# Supplementary material for: Consistent gene expression profiles in MexTAg transgenic mouse and wild type mouse asbestos-induced mesothelioma
Source: Springer Nature journal article supplement (doi:10.1186/s12885-015-1953-y), 2015-12-01
Supplement: MOESM2 [file 9745688]

| Gene       | logFC  | 2^       | adj_p_val | probeID      | genedesc                                                                                    |
|------------|--------|----------|-----------|--------------|---------------------------------------------------------------------------------------------|
| Fgf7       | -6.802 | 0.008962 | 0.00784   | 1422243_at   | fibroblast growth factor 7                                                                  |
| Postn      | -6.516 | 0.010927 | 0.0463    | 1423606_at   | periostin, osteoblast specific factor                                                       |
| Ogn        | -5.785 | 0.018136 | 0.0133    | 1419663_at   | osteoglycin                                                                                 |
| Thbs2      | -5.769 | 0.018338 | 0.0197    | 1450663_at   | thrombospondin 2                                                                            |
| Serpinf1   | -5.49  | 0.022251 | 0.0447    | 1453724_a_at | serine (or cysteine) peptidase inhibitor, clade F, member 1                                 |
| Succlg2    | -4.31  | 0.050415 | 0.0155    | 1427441_a_at | succinate-Coenzyme A ligase, GDP-forming, beta subunit                                      |
| Emb        | -4.218 | 0.053735 | 0.0448    | 1415857_at   | embigin                                                                                     |
| Ctsh       | -4.158 | 0.056017 | 0.0164    | 1418365_at   | cathepsin H                                                                                 |
| Ebf1       | -4.024 | 0.061469 | 0.0496    | 1416301_a_at | early B cell factor 1                                                                       |
| Lrrn4cl    | -3.46  | 0.090873 | 0.00591   | 1437771_at   | LRRN4 C-terminal like                                                                       |
| Loxl1      | -3.322 | 0.099995 | 0.0088    | 1451978_at   | lysyl oxidase-like 1                                                                        |
| Ckb        | -3.26  | 0.104386 | 0.0451    | 1455106_a_at | creatine kinase, brain                                                                      |
| S100a4     | -3.083 | 0.118012 | 0.0215    | 1424542_at   | S100 calcium binding protein A4                                                             |
| Leprel2    | -2.966 | 0.127981 | 0.0116    | 1449531_at   | leprecan-like 2                                                                             |
| Mn1        | -2.956 | 0.128871 | 0.0283    | 1454867_at   | meningioma 1                                                                                |
| Fmn12      | -2.869 | 0.136882 | 0.0453    | 1428579_at   | formin-like 2                                                                               |
| Pcdhb21    | -2.858 | 0.137929 | 0.0155    | 1420422_at   | protocadherin beta 21                                                                       |
| Trps1      | -2.854 | 0.138312 | 0.00585   | 1457445_at   | trichorhinophalangeal syndrome I (human)                                                    |
| Dnm3os     | -2.706 | 0.153254 | 0.0356    | 1427298_at   | dynamamin 3, opposite strand                                                                |
| AU042950   | -2.552 | 0.170518 | 0.0195    | 1458648_at   | expressed sequence AU042950                                                                 |
| Fam43a     | -2.503 | 0.176409 | 0.0157    | 1426734_at   | family with sequence similarity 43, member A                                                |
| Rgs3       | -2.401 | 0.189333 | 0.0273    | 1425701_a_at | regulator of G-protein signaling 3                                                          |
| Hic1       | -2.37  | 0.193446 | 0.0422    | 1449226_at   | hypermethylated in cancer 1                                                                 |
| Glis3      | -2.346 | 0.196691 | 0.00924   | 1430353_at   | GLIS family zinc finger 3                                                                   |
| 9030617003 | -2.192 | 0.218848 | 0.0191    | 1424226_at   | RIKEN cDNA 9030617003 gene                                                                  |
| Wdfy1      | -2.173 | 0.221749 | 0.0157    | 1435588_at   | WD repeat and FYVE domain containing 1                                                      |
| Zfp799     | -2.136 | 0.22751  | 0.0182    | 1437873_at   | zinc finger protein 799                                                                     |
| B230217C12 | -2.035 | 0.244008 | 0.014     | 1428568_at   | RIKEN cDNA B230217C12 gene                                                                  |
| Metti7a2   | -1.962 | 0.256672 | 0.0202    | 1434150_a_at | methyltransferase like 7A1 /// methyltransferase like 7A2                                   |
| Srpk2      | -1.961 | 0.25685  | 0.0294    | 1431372_at   | serine/arginine-rich protein specific kinase 2                                              |
| Ank3       | -1.948 | 0.259175 | 0.0148    | 1425202_a_at | ankyrin 3, epithelial                                                                       |
| Col1a2     | -1.94  | 0.260616 | 0.0362    | 1446326_at   | collagen, type I, alpha 2                                                                   |
| Sipa1l2    | -1.936 | 0.26134  | 0.0471    | 1434261_at   | signal-induced proliferation-associated 1 like 2                                            |
| Slc46a1    | -1.912 | 0.265724 | 0.0245    | 1426714_at   | solute carrier family 46, member 1                                                          |
| Cirbp      | -1.893 | 0.269247 | 0.0067    | 1416332_at   | cold inducible RNA binding protein                                                          |
| Ephx1      | -1.892 | 0.269433 | 0.016     | 1422438_at   | epoxide hydrolase 1, microsomal                                                             |
| Sgsh       | -1.867 | 0.274143 | 0.036     | 1438731_at   | N-sulfoglucosamine sulfohydrolase (sulfamidase)                                             |
| C430003N24 | -1.789 | 0.289373 | 0.0289    | 1457508_at   | RIKEN cDNA C430003N24 gene                                                                  |
| Asrgl1     | -1.749 | 0.297508 | 0.0274    | 1424396_a_at | asparaginase like 1                                                                         |
| Cyp20a1    | -1.749 | 0.297508 | 0.0343    | 1430452_at   | cytochrome P450, family 20, subfamily a, polypeptide 1                                      |
| Mark1      | -1.727 | 0.302079 | 0.0464    | 1449630_s_at | MAP/microtubule affinity-regulating kinase 1                                                |
| C130009A20 | -1.723 | 0.302918 | 0.00138   | 1444109_at   | RIKEN cDNA C130009A20 gene                                                                  |
| Btbd19     | -1.718 | 0.30397  | 0.0445    | 1429792_at   | BTB (POZ) domain containing 19                                                              |
| Gm11818    | -1.716 | 0.304392 | 0.0357    | 1440215_at   | predicted gene 11818                                                                        |
| Ccdc56     | -1.715 | 0.304603 | 0.00603   | 1423840_at   | coiled-coil domain containing 56                                                            |
| Kansl1     | -1.702 | 0.30736  | 0.0089    | 1457062_at   | KAT8 regulatory NSL complex subunit 1                                                       |
| Agxt2l2    | -1.681 | 0.311866 | 0.0168    | 1424745_at   | alanine-glyoxylate aminotransferase 2-like 2                                                |
| Mfsd3      | -1.675 | 0.313166 | 0.00293   | 1451433_at   | major facilitator superfamily domain containing 3                                           |
| Pttg1p     | -1.67  | 0.314253 | 0.00863   | 1420132_s_at | Pituitary tumor-transforming 1 interacting protein                                          |
| B4galt7    | -1.635 | 0.32197  | 0.00375   | 1426304_x_at | xylosylprotein beta1,4-galactosyltransferase, polypeptide 7 (galactosyltransferase I)       |
| MbtD1      | -1.628 | 0.323536 | 0.0302    | 1441100_at   | mbt domain containing 1                                                                     |
| Metti7a1   | -1.622 | 0.324885 | 0.0395    | 1434151_at   | methyltransferase like 7A1                                                                  |
| Orai3      | -1.614 | 0.326691 | 0.0294    | 1434064_at   | Orai calcium release-activated calcium modulator 3                                          |
| Tug1       | -1.601 | 0.329648 | 0.0402    | 1426771_at   | taurine upregulated gene 1                                                                  |
| Spnb2      | -1.575 | 0.335643 | 0.0328    | 1419255_at   | spectrin beta 2                                                                             |
| Tmem198b   | -1.572 | 0.336342 | 0.0212    | 1433820_a_at | transmembrane protein 198b                                                                  |
| GlrX       | -1.571 | 0.336575 | 0.0202    | 1416592_at   | glutaredoxin                                                                                |
| Rpl23      | -1.565 | 0.337978 | 0.00864   | 1422859_a_at | 60S ribosomal protein L23-like /// 60S ribosomal protein L23-like /// ribosomal protein L23 |
| Pten       | -1.554 | 0.340565 | 0.0179    | 1438454_at   | phosphatase and tensin homolog                                                              |

|             |        |          |         |              |                                                                                                   |
|-------------|--------|----------|---------|--------------|---------------------------------------------------------------------------------------------------|
| Tmem205     | -1.554 | 0.340565 | 0.028   | 1430421_a_at | transmembrane protein 205                                                                         |
| Scp2        | -1.546 | 0.342458 | 0.0238  | 1419975_at   | Sterol carrier protein 2, liver                                                                   |
| Kdm5b       | -1.522 | 0.348203 | 0.0237  | 1427142_s_at | lysine (K)-specific demethylase 5B                                                                |
| Strap       | -1.512 | 0.350625 | 0.0104  | 1419913_at   | Serine/threonine kinase receptor associated protein                                               |
| Zfp658      | -1.51  | 0.351111 | 0.0293  | 1439181_at   | zinc finger protein 658                                                                           |
| 4833412C15  | -1.501 | 0.353308 | 0.00929 | 1430360_at   | RIKEN cDNA 4833412C15 gene                                                                        |
| Tshz3       | -1.497 | 0.354289 | 0.0395  | 1435337_at   | teashirt zinc finger family member 3                                                              |
| Sco2        | -1.485 | 0.357249 | 0.0344  | 1432181_s_at | SCO cytochrome oxidase deficient homolog 2 (yeast)                                                |
| Lass6       | -1.48  | 0.358489 | 0.0272  | 1434418_at   | LAG1 homolog, ceramide synthase 6                                                                 |
| E430018J23f | -1.462 | 0.36299  | 0.0273  | 1425024_at   | RIKEN cDNA E430018J23 gene                                                                        |
| Dlx1        | -1.453 | 0.365261 | 0.0418  | 1449470_at   | distal-less homeobox 1                                                                            |
| Tpbp        | -1.445 | 0.367292 | 0.0311  | 1423312_at   | trophoblast glycoprotein                                                                          |
| A130012E19  | -1.435 | 0.369847 | 0.029   | 1440671_at   | RIKEN cDNA A130012E19 gene                                                                        |
| Cpsf6       | -1.434 | 0.370103 | 0.0273  | 1437372_at   | cleavage and polyadenylation specific factor 6                                                    |
| Gcxc        | -1.433 | 0.37036  | 0.0419  | 1423554_at   | gamma-glutamyl carboxylase                                                                        |
| Epm2aip1    | -1.424 | 0.372678 | 0.0493  | 1434105_at   | EPM2A (laforin) interacting protein 1                                                             |
| O610007C21  | -1.422 | 0.373195 | 0.0132  | 1428380_at   | RIKEN cDNA O610007C21 gene                                                                        |
| Jmjd1c      | -1.415 | 0.37501  | 0.00324 | 1439998_at   | jumonji domain containing 1C                                                                      |
| Hrsp12      | -1.414 | 0.37527  | 0.0332  | 1428326_s_at | heat-responsive protein 12                                                                        |
| Cwc25       | -1.394 | 0.380508 | 0.0253  | 1428759_s_at | CWC25 spliceosome-associated protein homolog (S. cerevisiae)                                      |
| D5Ert579e   | -1.394 | 0.380508 | 0.0318  | 1439691_at   | DNA segment, Chr 5, ERATO Doi 579, expressed                                                      |
| 2010003O02  | -1.393 | 0.380772 | 0.0444  | 1429115_at   | RIKEN cDNA 2010003O02 gene                                                                        |
| Dock7       | -1.382 | 0.383687 | 0.00391 | 1425315_at   | dedicator of cytokinesis 7                                                                        |
| Pccb        | -1.369 | 0.38716  | 0.0384  | 1450969_at   | propionyl Coenzyme A carboxylase, beta polypeptide                                                |
| Gpr137      | -1.367 | 0.387697 | 0.0109  | 1436377_at   | G protein-coupled receptor 137                                                                    |
| AA415038    | -1.356 | 0.390664 | 0.0273  | 1457111_at   | expressed sequence AA415038                                                                       |
| 5430416B10  | -1.339 | 0.395295 | 0.0472  | 1454558_at   | RIKEN cDNA 5430416B10 gene                                                                        |
| Prepl       | -1.325 | 0.399149 | 0.0314  | 1426345_at   | prolyl endopeptidase-like                                                                         |
| 6230409E13  | -1.321 | 0.400257 | 0.0395  | 1440934_at   | RIKEN cDNA 6230409E13 gene                                                                        |
| Rps3        | -1.313 | 0.402483 | 0.042   | 1455600_at   | ribosomal protein S3                                                                              |
| Zfr         | -1.304 | 0.405002 | 0.026   | 1443002_at   | zinc finger RNA binding protein                                                                   |
| Nus1        | -1.296 | 0.407254 | 0.0165  | 1419915_at   | Nuclear undecaprenyl pyrophosphate synthase 1 homolog (S. cerevisiae)                             |
| Pold4       | -1.295 | 0.407536 | 0.0155  | 1427885_at   | polymerase (DNA-directed), delta 4                                                                |
| Gns         | -1.292 | 0.408384 | 0.00636 | 1446861_at   | glucosamine (N-acetyl)-6-sulfatase                                                                |
| Npr13       | -1.289 | 0.409235 | 0.0343  | 1433548_at   | nitrogen permease regulator-like 3                                                                |
| Tmem80      | -1.27  | 0.41466  | 0.0311  | 1431726_a_at | transmembrane protein 80                                                                          |
| Rnf24       | -1.269 | 0.414947 | 0.0468  | 1436101_at   | ring finger protein 24                                                                            |
| Sdc4        | -1.268 | 0.415235 | 0.0356  | 1417654_at   | syndecan 4                                                                                        |
| Rnf41       | -1.263 | 0.416677 | 0.0292  | 1455763_at   | ring finger protein 41                                                                            |
| Nudt16      | -1.259 | 0.417833 | 0.00599 | 1439884_at   | nudix (nucleoside diphosphate linked moiety X)-type motif 16                                      |
| Nt5c        | -1.253 | 0.419575 | 0.00819 | 1417252_at   | 5',3'-nucleotidase, cytosolic                                                                     |
| Itm2c       | -1.239 | 0.423666 | 0.0271  | 1415961_at   | integral membrane protein 2C                                                                      |
| Snord47     | -1.232 | 0.425727 | 0.0384  | 1455904_at   | growth arrest specific 5 /// small nucleolar RNA, C/D box 47                                      |
| Pex12       | -1.229 | 0.426613 | 0.028   | 1416259_at   | peroxisomal biogenesis factor 12                                                                  |
| Gmcl1       | -1.225 | 0.427798 | 0.0273  | 1438888_at   | germ cell-less homolog 1 (Drosophila)                                                             |
| Acly        | -1.214 | 0.431072 | 0.00195 | 1439459_x_at | ATP citrate lyase                                                                                 |
| Rtn4        | -1.21  | 0.432269 | 0.00895 | 1435284_at   | reticulum 4                                                                                       |
| 2900053A13  | -1.207 | 0.433168 | 0.03    | 1453207_at   | RIKEN cDNA 2900053A13 gene                                                                        |
| Hdac2       | -1.189 | 0.438607 | 0.0289  | 1439704_at   | histone deacetylase 2                                                                             |
| Vps25       | -1.188 | 0.438911 | 0.0209  | 1428621_a_at | receptor (calcitonin) activity modifying protein 2 /// vacuolar protein sorting 25 (yeast)        |
| Rad1        | -1.187 | 0.439215 | 0.0109  | 1448414_at   | RAD1 homolog (S. pombe)                                                                           |
| Arfp2       | -1.183 | 0.440435 | 0.013   | 1435498_at   | ADP-ribosylation factor interacting protein 2                                                     |
| Zcchc7      | -1.163 | 0.446583 | 0.0179  | 1438580_at   | zinc finger, CCHC domain containing 7                                                             |
| Zfp719      | -1.162 | 0.446893 | 0.0272  | 1436594_at   | zinc finger protein 719                                                                           |
| LOC1008625  | -1.161 | 0.447202 | 0.0306  | 1429219_at   | IKBKB interacting protein /// inhibitor of nuclear factor kappa-B kinase-interacting protein-like |
| Laptm4b     | -1.154 | 0.449378 | 0.0363  | 1438365_x_at | lysosomal-associated protein transmembrane 4B                                                     |
| Slc38a10    | -1.15  | 0.450625 | 0.0196  | 1456241_a_at | solute carrier family 38, member 10                                                               |
| 1110032A03  | -1.124 | 0.45882  | 0.0421  | 1417211_a_at | RIKEN cDNA 1110032A03 gene                                                                        |
| Abhd14a     | -1.122 | 0.459456 | 0.0215  | 1441945_s_at | abhydrolase domain containing 14A                                                                 |
| Nudt8       | -1.114 | 0.462011 | 0.0195  | 1450111_a_at | nudix (nucleoside diphosphate linked moiety X)-type motif 8                                       |

|             |        |          |         |              |                                                                                                                                       |
|-------------|--------|----------|---------|--------------|---------------------------------------------------------------------------------------------------------------------------------------|
| Rbfox2      | -1.114 | 0.462011 | 0.0443  | 1418245_a_at | RNA binding protein, fox-1 homolog (C. elegans) 2                                                                                     |
| Arl2        | -1.112 | 0.462652 | 0.0276  | 1422549_at   | ADP-ribosylation factor-like 2                                                                                                        |
| Rdh5        | -1.11  | 0.463294 | 0.0071  | 1422614_s_at | biogenesis of lysosome-related organelles complex-1, subunit 1 /// retinol dehydrogenase 5                                            |
| Tmem19      | -1.11  | 0.463294 | 0.0384  | 1416261_at   | transmembrane protein 19                                                                                                              |
| Cst3        | -1.1   | 0.466516 | 0.0444  | 1426195_a_at | cystatin C                                                                                                                            |
| Tatdn1      | -1.094 | 0.468461 | 0.0357  | 1438513_at   | TatD DNase domain containing 1                                                                                                        |
| Tnfrsf10b   | -1.088 | 0.470413 | 0.0421  | 1422344_s_at | tumor necrosis factor receptor superfamily, member 10b                                                                                |
| Ubtd1       | -1.075 | 0.474671 | 0.0444  | 1424432_at   | ubiquitin domain containing 1                                                                                                         |
| Pdpr        | -1.075 | 0.474671 | 0.0493  | 1459869_x_at | pyruvate dehydrogenase phosphatase regulatory subunit                                                                                 |
| Insig1      | -1.07  | 0.476319 | 0.0178  | 1454671_at   | insulin induced gene 1                                                                                                                |
| 3110056003  | -1.066 | 0.477641 | 0.00621 | 1434658_at   | RIKEN cDNA 3110056003 gene                                                                                                            |
| Mir1931     | -1.063 | 0.478636 | 0.0149  | 1446130_at   | microRNA 1931                                                                                                                         |
| LOC1005050  | -1.063 | 0.478636 | 0.0262  | 1439005_x_at | uncharacterized LOC100505062                                                                                                          |
| Fasn        | -1.063 | 0.478636 | 0.03    | 1423828_at   | fatty acid synthase                                                                                                                   |
| Lamb1       | -1.062 | 0.478968 | 0.0247  | 1424114_s_at | laminin B1                                                                                                                            |
| Ppp1r12a    | -1.059 | 0.479965 | 0.0303  | 1429487_at   | protein phosphatase 1, regulatory (inhibitor) subunit 12A                                                                             |
| Rrp7a       | -1.059 | 0.479965 | 0.0303  | 1448141_at   | ribosomal RNA processing 7 homolog A (S. cerevisiae)                                                                                  |
| Glod4       | -1.057 | 0.48063  | 0.00143 | 1428421_a_at | glyoxalase domain containing 4                                                                                                        |
| Myh9        | -1.053 | 0.481965 | 0.0311  | 1420172_at   | Myosin, heavy polypeptide 9, non-muscle                                                                                               |
| Nudt19      | -1.038 | 0.487002 | 0.0306  | 1434216_a_at | nudix (nucleoside diphosphate linked moiety X)-type motif 19                                                                          |
| Pgpep1      | -1.038 | 0.487002 | 0.0327  | 1418329_at   | pyroglutamyl-peptidase I                                                                                                              |
| Arpc4       | -1.037 | 0.48734  | 0.0401  | 1423589_at   | actin related protein 2/3 complex, subunit 4                                                                                          |
| Tmed3       | -1.035 | 0.488016 | 0.0335  | 1416108_a_at | transmembrane emp24 domain containing 3                                                                                               |
| D11Wsu47e   | -1.034 | 0.488354 | 0.0273  | 1452805_at   | DNA segment, Chr 11, Wayne State University 47, expressed                                                                             |
| Erlec1      | -1.028 | 0.49039  | 0.0372  | 1451449_at   | endoplasmic reticulum lectin 1                                                                                                        |
| Znhit2      | -1.026 | 0.49107  | 0.0306  | 1416651_at   | zinc finger, HIT domain containing 2                                                                                                  |
| 1810009A15  | -1.023 | 0.492092 | 0.00138 | 1417886_at   | RIKEN cDNA 1810009A15 gene                                                                                                            |
| 8430408J09f | -1.017 | 0.494143 | 0.0476  | 1430196_at   | RIKEN cDNA 8430408J09 gene                                                                                                            |
| Stox2       | -1.014 | 0.495171 | 0.024   | 1457778_at   | storkhead box 2                                                                                                                       |
| Tspyl1      | -1.014 | 0.495171 | 0.0485  | 1415908_at   | testis-specific protein, Y-encoded-like 1                                                                                             |
| Tll1        | -1.007 | 0.49758  | 0.0332  | 1436833_x_at | tubulin tyrosine ligase-like 1                                                                                                        |
| Mbnl2       | -1.005 | 0.49827  | 0.026   | 1436858_at   | muscleblind-like 2                                                                                                                    |
| H13         | -1.002 | 0.499307 | 0.0421  | 1417287_at   | histocompatibility 13                                                                                                                 |
| Tada1       | -0.993 | 0.502432 | 0.0302  | 1424427_at   | transcriptional adaptor 1                                                                                                             |
| Sdf2        | -0.988 | 0.504176 | 0.0327  | 1416857_at   | stromal cell derived factor 2                                                                                                         |
| Thap4       | -0.984 | 0.505576 | 0.0153  | 1458185_at   | THAP domain containing 4                                                                                                              |
| Wdr6        | -0.983 | 0.505927 | 0.0176  | 1455940_x_at | WD repeat domain 6                                                                                                                    |
| Tm9sf3      | -0.98  | 0.50698  | 0.0456  | 1428412_at   | transmembrane 9 superfamily member 3                                                                                                  |
| Rpl14       | -0.962 | 0.513345 | 0.0493  | 1422128_at   | ribosomal protein L14                                                                                                                 |
| Hadha       | -0.957 | 0.515127 | 0.0478  | 1452173_at   | hydroxyacyl-Coenzyme A dehydrogenase/3-ketoacyl-Coenzyme A thiolase/enoyl-Coenzyme A hydratase (trifunctional protein), alpha subunit |
| Phb         | -0.956 | 0.515484 | 0.0476  | 1417053_at   | RIKEN cDNA 1700071K01 gene /// prohibitin                                                                                             |
| A230046K03  | -0.948 | 0.518351 | 0.016   | 1437719_x_at | RIKEN cDNA A230046K03 gene                                                                                                            |
| Stra13      | -0.948 | 0.518351 | 0.024   | 1416553_at   | stimulated by retinoic acid 13                                                                                                        |
| H2afy3      | -0.947 | 0.51871  | 0.0272  | 1450307_x_at | H2A histone family, member Y3                                                                                                         |
| Cnpy2       | -0.945 | 0.51943  | 0.0273  | 1437783_x_at | canopy 2 homolog (zebrafish)                                                                                                          |
| Mpdu1       | -0.942 | 0.520511 | 0.0463  | 1416104_at   | mannose-P-dolichol utilization defect 1                                                                                               |
| LOC1008617  | -0.931 | 0.524495 | 0.0357  | 1431328_at   | uncharacterized LOC100861758                                                                                                          |
| Map3k12     | -0.929 | 0.525222 | 0.0071  | 1438908_at   | mitogen-activated protein kinase kinase 12                                                                                            |
| Tbcd        | -0.926 | 0.526316 | 0.0237  | 1455801_x_at | tubulin-specific chaperone d                                                                                                          |
| Rpl37       | -0.907 | 0.533293 | 0.00138 | 1438291_x_at | predicted pseudogene 13826 /// ribosomal protein L37                                                                                  |
| Tspan31     | -0.907 | 0.533293 | 0.0049  | 1430029_a_at | tetraspanin 31                                                                                                                        |
| Noc3l       | -0.906 | 0.533663 | 0.0355  | 1437500_at   | nucleolar complex associated 3 homolog (S. cerevisiae)                                                                                |
| Tex264      | -0.905 | 0.534033 | 0.0104  | 1425068_a_at | testis expressed gene 264                                                                                                             |
| Stxbp4      | -0.897 | 0.537002 | 0.0419  | 1451063_at   | syntaxin binding protein 4                                                                                                            |
| Ywhaz       | -0.894 | 0.53812  | 0.0277  | 1436981_a_at | uncharacterized LOC100505062 /// tyrosine 3-monooxygenase/tryptophan 5-monooxygenase activation protein, zeta polypeptide             |
| 1200014J11f | -0.891 | 0.53924  | 0.0109  | 1439363_at   | RIKEN cDNA 1200014J11 gene                                                                                                            |
| Slc25a20    | -0.887 | 0.540737 | 0.0432  | 1423108_at   | solute carrier family 25 (mitochondrial carnitine/acylcarnitine translocase), member 20                                               |
| LOC1005049  | -0.881 | 0.542991 | 0.00827 | 1437844_x_at | component of oligomeric golgi complex 1 /// conserved oligomeric Golgi complex subunit 1-like                                         |
| BC003331    | -0.873 | 0.54601  | 0.0252  | 1426089_a_at | cDNA sequence BC003331                                                                                                                |
| Use1        | -0.854 | 0.553249 | 0.0367  | 1423817_s_at | unconventional SNARE in the ER 1 homolog (S. cerevisiae)                                                                              |

|             |        |          |         |              |                                                                                                                       |
|-------------|--------|----------|---------|--------------|-----------------------------------------------------------------------------------------------------------------------|
| Cnot2       | -0.852 | 0.554016 | 0.00398 | 1456576_x_at | CCR4-NOT transcription complex, subunit 2                                                                             |
| Dock1       | -0.845 | 0.556711 | 0.0057  | 1452220_at   | dedicator of cytokinesis 1                                                                                            |
| Ttc33       | -0.837 | 0.559806 | 0.0324  | 1423958_a_at | tetratricopeptide repeat domain 33                                                                                    |
| Slc29a3     | -0.837 | 0.559806 | 0.0473  | 1455731_at   | solute carrier family 29 (nucleoside transporters), member 3                                                          |
| 2310004I24f | -0.835 | 0.560583 | 0.0317  | 1450987_a_at | RIKEN cDNA 2310004I24 gene                                                                                            |
| 1110005A03  | -0.834 | 0.560972 | 0.0273  | 1451448_a_at | RIKEN cDNA 1110005A03 gene                                                                                            |
| Yipf3       | -0.833 | 0.561361 | 0.0384  | 1451284_at   | Yip1 domain family, member 3                                                                                          |
| Spag7       | -0.828 | 0.56331  | 0.0355  | 1433940_at   | sperm associated antigen 7                                                                                            |
| Comm5       | -0.816 | 0.568015 | 0.0497  | 1451369_at   | COMM domain containing 5                                                                                              |
| Cdk12       | -0.814 | 0.568803 | 0.0262  | 1455964_at   | cyclin-dependent kinase 12                                                                                            |
| Mrps34      | -0.812 | 0.569592 | 0.0164  | 1421971_a_at | mitochondrial ribosomal protein S34                                                                                   |
| Csnk1d      | -0.812 | 0.569592 | 0.0178  | 1437690_x_at | casein kinase 1, delta                                                                                                |
| Rps6kb1     | -0.809 | 0.570777 | 0.0293  | 1460705_at   | ribosomal protein S6 kinase, polypeptide 1                                                                            |
| Cdc40       | -0.803 | 0.573156 | 0.0242  | 1457366_at   | cell division cycle 40                                                                                                |
| Mpg         | -0.802 | 0.573554 | 0.0279  | 1417571_at   | N-methylpurine-DNA glycosylase                                                                                        |
| Cuedc2      | -0.799 | 0.574747 | 0.0475  | 1431145_a_at | CUE domain containing 2                                                                                               |
| Poldip2     | -0.798 | 0.575146 | 0.0487  | 1450727_a_at | polymerase (DNA-directed), delta interacting protein 2                                                                |
| Mrpl11      | -0.792 | 0.577543 | 0.0189  | 1437131_x_at | mitochondrial ribosomal protein L11                                                                                   |
| Taok1       | -0.779 | 0.582771 | 0.00195 | 1426358_at   | TAO kinase 1                                                                                                          |
| Sap30bp     | -0.773 | 0.585199 | 0.0155  | 1449295_at   | SAP30-binding protein-like /// SAP30 binding protein                                                                  |
| Gosr2       | -0.768 | 0.587231 | 0.0182  | 1419371_s_at | golgi SNAP receptor complex member 2                                                                                  |
| Ict1        | -0.767 | 0.587638 | 0.00618 | 1460308_a_at | immature colon carcinoma transcript 1                                                                                 |
| Cuedc1      | -0.765 | 0.588453 | 0.0353  | 1435358_at   | CUE domain containing 1                                                                                               |
| Lmf1        | -0.756 | 0.592136 | 0.0384  | 1424259_at   | lipase maturation factor 1                                                                                            |
| Tomm7       | -0.755 | 0.592546 | 0.0476  | 1434732_x_at | predicted gene 7226 /// translocase of outer mitochondrial membrane 7 homolog (yeast)                                 |
| Asb3        | -0.754 | 0.592957 | 0.0384  | 1417361_at   | ankyrin repeat and SOCS box-containing 3                                                                              |
| Ccdc91      | -0.746 | 0.596254 | 0.026   | 1449083_at   | coiled-coil domain containing 91                                                                                      |
| Chrac1      | -0.73  | 0.602904 | 0.0321  | 1459859_x_at | chromatin accessibility complex 1                                                                                     |
| Skp1a       | -0.711 | 0.610897 | 0.0109  | 1423149_at   | S-phase kinase-associated protein 1A                                                                                  |
| Tax1bp3     | -0.711 | 0.610897 | 0.0273  | 1455871_s_at | tax1-binding protein 3-like /// ribosomal protein L13 /// Tax1 (human T cell leukemia virus type I) binding protein 3 |
| Cttn        | -0.687 | 0.621144 | 0.0306  | 1433908_a_at | cortactin                                                                                                             |
| Srp68       | -0.687 | 0.621144 | 0.0443  | 1433708_at   | signal recognition particle 68                                                                                        |
| Rnfl139     | -0.683 | 0.622869 | 0.0251  | 1429425_at   | ring finger protein 139                                                                                               |
| Slc35e3     | -0.68  | 0.624165 | 0.0453  | 1428805_at   | solute carrier family 35, member E3                                                                                   |
| BC004004    | -0.674 | 0.626767 | 0.022   | 1416608_a_at | cDNA sequence BC004004                                                                                                |
| Txndc17     | -0.673 | 0.627201 | 0.0245  | 1439184_s_at | thioredoxin domain containing 17                                                                                      |
| Lrrc14      | -0.671 | 0.628071 | 0.0419  | 1424419_at   | leucine rich repeat containing 14                                                                                     |
| Idnk        | -0.666 | 0.630252 | 0.0395  | 1424496_at   | idnK gluconokinase homolog (E. coli)                                                                                  |
| Strada      | -0.663 | 0.631564 | 0.0468  | 1438591_at   | STE20-related kinase adaptor alpha                                                                                    |
| Csnk1g2     | -0.657 | 0.634196 | 0.0149  | 1423370_a_at | casein kinase 1, gamma 2                                                                                              |
| Eif3e       | -0.645 | 0.639493 | 0.0162  | 1439268_x_at | eukaryotic translation initiation factor 3, subunit E                                                                 |
| Srp72       | -0.642 | 0.640824 | 0.0309  | 1428876_at   | signal recognition particle 72                                                                                        |
| Eef1g       | -0.641 | 0.641268 | 0.0211  | 1417364_at   | eukaryotic translation elongation factor 1 gamma                                                                      |
| Eef1d       | -0.629 | 0.646624 | 0.0384  | 1449506_a_at | eukaryotic translation elongation factor 1 delta (guanine nucleotide exchange protein)                                |
| Gm19974     | -0.621 | 0.65022  | 0.0293  | 1420304_x_at | predicted gene, 19974                                                                                                 |
| Cct2        | -0.617 | 0.652025 | 0.0273  | 1433534_a_at | chaperonin containing Tcp1, subunit 2 (beta)                                                                          |
| Rptor       | -0.61  | 0.655197 | 0.0372  | 1434619_at   | regulatory associated protein of MTOR, complex 1                                                                      |
| Cltc        | -0.608 | 0.656106 | 0.0109  | 1454626_at   | clathrin, heavy polypeptide (Hc)                                                                                      |
| Ears2       | -0.6   | 0.659754 | 0.0434  | 1451471_at   | glutamyl-tRNA synthetase 2 (mitochondrial)(putative)                                                                  |
| Usp47       | -0.594 | 0.662504 | 0.0276  | 1426976_at   | ubiquitin specific peptidase 47                                                                                       |
| Sar1b       | -0.558 | 0.679243 | 0.0363  | 1428163_at   | SAR1 gene homolog B (S. cerevisiae)                                                                                   |
| Bloc1s3     | -0.551 | 0.682547 | 0.0493  | 1427390_at   | biogenesis of lysosome-related organelles complex-1, subunit 3                                                        |
| D10Wsu52e   | -0.535 | 0.690159 | 0.0253  | 1423880_at   | DNA segment, Chr 10, Wayne State University 52, expressed                                                             |
| Sharpin     | -0.509 | 0.702709 | 0.0478  | 1424165_a_at | SHANK-associated RH domain interacting protein                                                                        |
| Eef2        | -0.5   | 0.707107 | 0.0165  | 1424736_at   | eukaryotic translation elongation factor 2                                                                            |
| Tcf20       | -0.497 | 0.708579 | 0.0384  | 1421910_at   | transcription factor 20                                                                                               |
| Cand1       | -0.49  | 0.712025 | 0.0302  | 1428648_at   | cullin associated and neddylation disassociated 1                                                                     |
| Canx        | -0.488 | 0.713013 | 0.0321  | 1415692_s_at | calnexin                                                                                                              |
| Gm6607      | -0.45  | 0.732043 | 0.0335  | 1425238_at   | 40S ribosomal protein S20 pseudogene                                                                                  |
| Rpl13a      | -0.428 | 0.743291 | 0.0311  | 1455001_x_at | ribosomal protein L13A                                                                                                |

|            |        |          |         |              |                                                                                                                                                                                   |
|------------|--------|----------|---------|--------------|-----------------------------------------------------------------------------------------------------------------------------------------------------------------------------------|
| Naca       | -0.422 | 0.746389 | 0.0123  | 1416669_s_at | nascent polypeptide-associated complex alpha polypeptide                                                                                                                          |
| Ssr1       | -0.42  | 0.747425 | 0.0487  | 1417763_at   | signal sequence receptor, alpha                                                                                                                                                   |
| Rps9       | -0.412 | 0.751581 | 0.00631 | 1433689_s_at | ribosomal protein S9                                                                                                                                                              |
| Lmf2       | -0.4   | 0.757858 | 0.0376  | 1433100_at   | lipase maturation factor 2                                                                                                                                                        |
| Rpl38      | -0.373 | 0.772175 | 0.0241  | 1433472_x_at | ribosomal protein L38                                                                                                                                                             |
| Rps15a-ps5 | -0.322 | 0.79996  | 0.028   | 1453467_s_at | ribosomal protein S15A /// ribosomal protein S15A, pseudogene 5                                                                                                                   |
| LOC1008619 | 0.284  | 1.217566 | 0.0492  | 1439472_at   | GCN1 general control of amino-acid synthesis 1-like 1 (yeast) /// translational activator GCN1-like                                                                               |
| Sp4        | 0.316  | 1.244874 | 0.043   | 1421504_at   | trans-acting transcription factor 4                                                                                                                                               |
| Ing5       | 0.354  | 1.278099 | 0.0276  | 1431134_at   | inhibitor of growth family, member 5                                                                                                                                              |
| Zfp511     | 0.368  | 1.290562 | 0.0195  | 1434858_x_at | zinc finger protein 511                                                                                                                                                           |
| Tsc1       | 0.408  | 1.326845 | 0.0354  | 1422043_at   | tuberous sclerosis 1                                                                                                                                                              |
| Arid2      | 0.459  | 1.374589 | 0.0468  | 1432483_at   | AT rich interactive domain 2 (ARID, RFX-like)                                                                                                                                     |
| Gm6340     | 0.463  | 1.378405 | 0.0473  | 1416698_a_at | CDC28 protein kinase 1b /// predicted pseudogene 6340                                                                                                                             |
| Tor1a      | 0.476  | 1.390882 | 0.0153  | 1426515_a_at | torsin family 1, member A (torsin A)                                                                                                                                              |
| Ssna1      | 0.485  | 1.399586 | 0.0496  | 1448643_at   | Sjogren's syndrome nuclear autoantigen 1                                                                                                                                          |
| Rcan3      | 0.504  | 1.41814  | 0.00747 | 1450450_at   | regulator of calcineurin 3                                                                                                                                                        |
| Stard7     | 0.509  | 1.423063 | 0.0252  | 1449628_s_at | START domain containing 7                                                                                                                                                         |
| Zbtb2      | 0.51   | 1.42405  | 0.0228  | 1457037_at   | zinc finger and BTB domain containing 2                                                                                                                                           |
| Ankrd11    | 0.518  | 1.431969 | 0.026   | 1456110_at   | ankyrin repeat domain 11                                                                                                                                                          |
| Smad2      | 0.521  | 1.43495  | 0.0367  | 1420634_a_at | SMAD family member 2                                                                                                                                                              |
| Txn1       | 0.548  | 1.462057 | 0.0356  | 1436947_a_at | thioredoxin-like 1                                                                                                                                                                |
| Uck1       | 0.552  | 1.466117 | 0.0403  | 1424399_at   | uridine-cytidine kinase 1                                                                                                                                                         |
| Rad17      | 0.56   | 1.474269 | 0.0343  | 1448762_at   | RAD17 homolog (S. pombe)                                                                                                                                                          |
| Pabpn1     | 0.572  | 1.486583 | 0.0496  | 1422849_a_at | poly(A) binding protein, nuclear 1                                                                                                                                                |
| Dennd5b    | 0.575  | 1.489677 | 0.0293  | 1458146_at   | DENN/MADD domain containing 5B                                                                                                                                                    |
| Cops7b     | 0.582  | 1.496923 | 0.0195  | 1418721_at   | COP9 (constitutive photomorphogenic) homolog, subunit 7b (Arabidopsis thaliana)                                                                                                   |
| Ubap2l     | 0.582  | 1.496923 | 0.0272  | 1433541_a_at | ubiquitin associated protein 2-like                                                                                                                                               |
| Nt5c3      | 0.587  | 1.50212  | 0.0484  | 1451050_at   | 5'-nucleotidase, cytosolic III                                                                                                                                                    |
| Mef2d      | 0.588  | 1.503161 | 0.0354  | 1437300_at   | myocyte enhancer factor 2D                                                                                                                                                        |
| Rnf115     | 0.618  | 1.534746 | 0.0178  | 1423615_at   | ring finger protein 115                                                                                                                                                           |
| B4galt1    | 0.622  | 1.539007 | 0.0186  | 1418014_a_at | UDP-Gal:betaGlcNAc beta 1,4- galactosyltransferase, polypeptide 1                                                                                                                 |
| Snrpd1     | 0.622  | 1.539007 | 0.0315  | 1416336_s_at | predicted gene 14277 /// small nuclear ribonucleoprotein D1                                                                                                                       |
| Fbxw2      | 0.627  | 1.54435  | 0.0273  | 1432411_a_at | F-box and WD-40 domain protein 2                                                                                                                                                  |
| Pask       | 0.646  | 1.564824 | 0.0366  | 1450993_at   | PAS domain containing serine/threonine kinase                                                                                                                                     |
| Zc3hav1    | 0.653  | 1.572435 | 0.0311  | 1436183_at   | zinc finger CCCH type, antiviral 1                                                                                                                                                |
| Luc7l2     | 0.655  | 1.574616 | 0.028   | 1423251_at   | LUC7-like 2 (S. cerevisiae)                                                                                                                                                       |
| Pogz       | 0.667  | 1.587768 | 0.0325  | 1434650_at   | pogo transposable element with ZNF domain                                                                                                                                         |
| Fbxl14     | 0.675  | 1.596597 | 0.0187  | 1417407_at   | F-box and leucine-rich repeat protein 14                                                                                                                                          |
| Wrip1      | 0.677  | 1.598812 | 0.0419  | 1448376_at   | Werner helicase interacting protein 1                                                                                                                                             |
| Sfmbt1     | 0.683  | 1.605475 | 0.00328 | 1455412_at   | Scm-like with four mbt domains 1                                                                                                                                                  |
| Lrrc57     | 0.685  | 1.607702 | 0.0228  | 1430057_s_at | leucine rich repeat containing 57                                                                                                                                                 |
| Phf2       | 0.687  | 1.609932 | 0.0228  | 1421067_a_at | PHD finger protein 2                                                                                                                                                              |
| Zfp472     | 0.699  | 1.623379 | 0.0134  | 1425058_at   | zinc finger protein 472                                                                                                                                                           |
| Fam82a2    | 0.701  | 1.625631 | 0.0215  | 1452704_at   | family with sequence similarity 82, member A2                                                                                                                                     |
| Lrrc40     | 0.708  | 1.633538 | 0.0228  | 1448720_at   | leucine rich repeat containing 40                                                                                                                                                 |
| Map3k3     | 0.708  | 1.633538 | 0.0382  | 1436522_at   | mitogen-activated protein kinase kinase kinase 3                                                                                                                                  |
| Zfp653     | 0.709  | 1.634671 | 0.0425  | 1435481_at   | zinc finger protein 653                                                                                                                                                           |
| Ltn1       | 0.71   | 1.635804 | 0.0138  | 1427950_at   | listerin E3 ubiquitin protein ligase 1                                                                                                                                            |
| Ube2l3     | 0.71   | 1.635804 | 0.0165  | 1448880_at   | predicted gene 10015 /// predicted gene 10145 /// predicted gene 10705 /// predicted gene 5858 /// ubiquitin-conjugating enzyme E2 L3-like /// ubiquitin-conjugating enzyme E2L 3 |
| R3hdm1     | 0.711  | 1.636938 | 0.0464  | 1458539_at   | R3H domain 1 (binds single-stranded nucleic acids)                                                                                                                                |
| Clcn7      | 0.712  | 1.638073 | 0.0384  | 1450408_at   | chloride channel 7                                                                                                                                                                |
| Qk         | 0.714  | 1.640346 | 0.0113  | 1429318_a_at | quaking                                                                                                                                                                           |
| Mkln1      | 0.717  | 1.64376  | 0.0472  | 1436096_at   | muskelin 1, intracellular mediator containing kelch motifs                                                                                                                        |
| Opa1       | 0.722  | 1.649467 | 0.0071  | 1418768_at   | optic atrophy 1                                                                                                                                                                   |
| Ccdc14     | 0.728  | 1.656341 | 0.0351  | 1435654_at   | coiled-coil domain containing 14                                                                                                                                                  |
| Mapkapk5   | 0.731  | 1.659789 | 0.0471  | 1427790_at   | a disintegrin and metalloproteinase domain 1a /// MAP kinase-activated protein kinase 5                                                                                           |
| Rbm18      | 0.732  | 1.66094  | 0.00585 | 1420607_at   | RNA binding motif protein 18                                                                                                                                                      |
| Tnrc18     | 0.734  | 1.663244 | 0.0223  | 1427267_at   | trinucleotide repeat containing 18                                                                                                                                                |
| Cep192     | 0.746  | 1.677136 | 0.0468  | 1428727_at   | centrosomal protein 192                                                                                                                                                           |
| Actl6a     | 0.751  | 1.682959 | 0.0475  | 1416569_at   | actin-like 6A                                                                                                                                                                     |

|              |       |          |         |              |                                                                                              |
|--------------|-------|----------|---------|--------------|----------------------------------------------------------------------------------------------|
| Cept1        | 0.752 | 1.684126 | 0.0272  | 1416471_at   | choline/ethanolaminephosphotransferase 1                                                     |
| Uap1         | 0.759 | 1.692317 | 0.00611 | 1416743_at   | UDP-N-acetylglucosamine pyrophosphorylase 1                                                  |
| Coro7        | 0.766 | 1.700548 | 0.00141 | 1428148_s_at | coronin 7                                                                                    |
| Bcas2        | 0.77  | 1.70527  | 0.00872 | 1418234_s_at | breast carcinoma amplified sequence 2                                                        |
| Pggt1b       | 0.771 | 1.706452 | 0.0402  | 1429769_at   | protein geranylgeranyltransferase type I, beta subunit                                       |
| Exosc10      | 0.779 | 1.715941 | 0.0431  | 1431832_x_at | exosome component 10                                                                         |
| Hcfc1        | 0.787 | 1.725483 | 0.0273  | 1421972_s_at | host cell factor C1                                                                          |
| 2810408B13   | 0.79  | 1.729074 | 0.0397  | 1422172_x_at | RIKEN cDNA 2810408B13 gene                                                                   |
| C2cd2l       | 0.791 | 1.730273 | 0.0343  | 1428095_a_at | C2 calcium-dependent domain containing 2-like                                                |
| Gmeb2        | 0.793 | 1.732674 | 0.0478  | 1454818_at   | glucocorticoid modulatory element binding protein 2                                          |
| Dsn1         | 0.795 | 1.735077 | 0.0266  | 1417139_at   | DSN1, MIND kinetochore complex component, homolog (S. cerevisiae)                            |
| Dgcr2        | 0.801 | 1.742308 | 0.0092  | 1421809_at   | DiGeorge syndrome critical region gene 2                                                     |
| Mynn         | 0.801 | 1.742308 | 0.0272  | 1421333_a_at | myoneurin                                                                                    |
| Mapk14       | 0.803 | 1.744725 | 0.0338  | 1416704_at   | mitogen-activated protein kinase 14                                                          |
| Xpo4         | 0.804 | 1.745935 | 0.00871 | 1430797_at   | exportin 4                                                                                   |
| Hltf         | 0.804 | 1.745935 | 0.0314  | 1425996_a_at | helicase-like transcription factor                                                           |
| Agk          | 0.805 | 1.747146 | 0.0279  | 1431655_a_at | acylglycerol kinase                                                                          |
| Asx1l        | 0.807 | 1.74957  | 0.0343  | 1458380_at   | additional sex combs like 1                                                                  |
| Carhsp1      | 0.81  | 1.753211 | 0.0247  | 1415976_a_at | calcium regulated heat stable protein 1                                                      |
| Pcna         | 0.811 | 1.754427 | 0.00786 | 1417947_at   | proliferating cell nuclear antigen                                                           |
| Isca2        | 0.811 | 1.754427 | 0.0478  | 1424154_a_at | iron-sulfur cluster assembly 2 homolog (S. cerevisiae)                                       |
| Rnf8         | 0.813 | 1.756861 | 0.0189  | 1451082_at   | FtsJ methyltransferase domain containing 2 /// ring finger protein 8                         |
| Crkl         | 0.823 | 1.769081 | 0.0116  | 1421954_at   | v-crk sarcoma virus CT10 oncogene homolog (avian)-like                                       |
| Trappc8      | 0.831 | 1.778918 | 0.0057  | 1428969_at   | trafficking protein particle complex 8                                                       |
| Pygo2        | 0.832 | 1.780151 | 0.0415  | 1428249_at   | pygopus 2                                                                                    |
| Sp1          | 0.836 | 1.785094 | 0.0104  | 1448994_at   | trans-acting transcription factor 1                                                          |
| Paip2b       | 0.837 | 1.786332 | 0.0463  | 1451125_at   | poly(A) binding protein interacting protein 2B                                               |
| Arddc1       | 0.845 | 1.796265 | 0.0225  | 1424578_at   | arrestin domain containing 1                                                                 |
| Jund         | 0.847 | 1.798757 | 0.0315  | 1449117_at   | Jun proto-oncogene related gene d                                                            |
| Atxn7        | 0.85  | 1.802501 | 0.0168  | 1426287_at   | ataxin 7                                                                                     |
| Zfp131       | 0.852 | 1.805001 | 0.0344  | 1428616_at   | zinc finger protein 131                                                                      |
| Raver1-fdx1l | 0.853 | 1.806253 | 0.0278  | 1427111_s_at | ribonucleoprotein, PTB-binding 1 /// Raver1-Fdx1l readthrough                                |
| Mbd2         | 0.854 | 1.807505 | 0.0128  | 1425803_a_at | methyl-CpG binding domain protein 2                                                          |
| Cdkn2aipnl   | 0.854 | 1.807505 | 0.0408  | 1440715_s_at | CDKN2A interacting protein N-terminal like                                                   |
| Trmt2b       | 0.856 | 1.810013 | 0.0246  | 1433672_at   | TRM2 tRNA methyltransferase 2 homolog B (S. cerevisiae)                                      |
| Tpx2         | 0.857 | 1.811268 | 0.0429  | 1428104_at   | TPX2, microtubule-associated protein homolog (Xenopus laevis)                                |
| Stxbp3a      | 0.857 | 1.811268 | 0.0463  | 1416653_at   | syntaxin binding protein 3A                                                                  |
| Ttbk2        | 0.86  | 1.815038 | 0.0161  | 1440734_at   | tau tubulin kinase 2                                                                         |
| 6330564D18   | 0.862 | 1.817556 | 0.00895 | 1460624_at   | RIKEN cDNA 6330564D18 gene                                                                   |
| Naa38        | 0.867 | 1.823866 | 0.0297  | 1436107_at   | N(alpha)-acetyltransferase 38, NatC auxiliary subunit                                        |
| Ezh2         | 0.87  | 1.827663 | 0.028   | 1416544_at   | enhancer of zeste homolog 2 (Drosophila)                                                     |
| Arhgap11a    | 0.872 | 1.830198 | 0.0384  | 1438434_at   | Rho GTPase activating protein 11A                                                            |
| Zfp944       | 0.876 | 1.83528  | 0.03    | 1425085_at   | zinc finger protein 944                                                                      |
| Usp1         | 0.88  | 1.840375 | 0.0273  | 1451080_at   | ubiquitin specific peptidase 1                                                               |
| Pms1         | 0.88  | 1.840375 | 0.0302  | 1438071_at   | postmeiotic segregation increased 1 (S. cerevisiae)                                          |
| Arid1a       | 0.884 | 1.845485 | 0.0345  | 1448709_at   | AT rich interactive domain 1A (SWI-like)                                                     |
| Stag2        | 0.888 | 1.850609 | 0.0278  | 1450396_at   | stromal antigen 2                                                                            |
| Rnf168       | 0.891 | 1.854461 | 0.00784 | 1455585_at   | ring finger protein 168                                                                      |
| Wnk1         | 0.891 | 1.854461 | 0.0417  | 1437888_at   | WNK lysine deficient protein kinase 1                                                        |
| Trmt2a       | 0.893 | 1.857034 | 0.00143 | 1453995_a_at | TRM2 tRNA methyltransferase 2 homolog A (S. cerevisiae)                                      |
| Tmem189      | 0.895 | 1.85961  | 0.00784 | 1424411_at   | transmembrane protein 189                                                                    |
| Stk4         | 0.895 | 1.85961  | 0.0198  | 1421107_at   | serine/threonine kinase 4                                                                    |
| Ckap2l       | 0.896 | 1.860899 | 0.00811 | 1453769_at   | cytoskeleton associated protein 2-like                                                       |
| Atp11b       | 0.896 | 1.860899 | 0.0418  | 1451388_a_at | ATPase, class VI, type 11B                                                                   |
| Prdm2        | 0.899 | 1.864773 | 0.028   | 1453068_at   | PR domain containing 2, with ZNF domain                                                      |
| 3110001I22f  | 0.91  | 1.879045 | 0.0197  | 1429165_at   | RIKEN cDNA 3110001I22 gene                                                                   |
| Plekha8      | 0.91  | 1.879045 | 0.0377  | 1454819_at   | pleckstrin homology domain containing, family A (phosphoinositide binding specific) member 8 |
| Luzp1        | 0.912 | 1.881652 | 0.0456  | 1448352_at   | leucine zipper protein 1                                                                     |
| Ss18         | 0.918 | 1.889494 | 0.0463  | 1419361_at   | synovial sarcoma translocation, Chromosome 18                                                |
| Etnk1        | 0.922 | 1.89474  | 0.00863 | 1454633_at   | ethanolamine kinase 1                                                                        |

|            |       |          |         |              |                                                                                                |
|------------|-------|----------|---------|--------------|------------------------------------------------------------------------------------------------|
| 1700021K19 | 0.923 | 1.896054 | 0.0326  | 1428243_at   | RIKEN cDNA 1700021K19 gene                                                                     |
| Gon4l      | 0.928 | 1.902637 | 0.0197  | 1424385_at   | gon-4-like (C.elegans)                                                                         |
| Ankhd1     | 0.928 | 1.902637 | 0.0488  | 1448008_at   | ankyrin repeat and KH domain containing 1                                                      |
| Dhfr       | 0.93  | 1.905276 | 0.0476  | 1419172_at   | dihydrofolate reductase                                                                        |
| Cdc25c     | 0.941 | 1.919859 | 0.0488  | 1422252_a_at | cell division cycle 25C                                                                        |
| Ube2t      | 0.943 | 1.922522 | 0.0444  | 1422462_at   | ubiquitin-conjugating enzyme E2T (putative)                                                    |
| Zfand2a    | 0.943 | 1.922522 | 0.0455  | 1415940_at   | zinc finger, AN1-type domain 2A                                                                |
| Ankrd13c   | 0.945 | 1.925189 | 0.0134  | 1433521_at   | ankyrin repeat domain 13c                                                                      |
| Nup160     | 0.945 | 1.925189 | 0.0403  | 1418530_at   | nucleoporin 160                                                                                |
| Synj1      | 0.946 | 1.926524 | 0.0468  | 1436334_at   | synaptojanin 1                                                                                 |
| Zranb3     | 0.957 | 1.941269 | 0.0087  | 1453617_at   | zinc finger, RAN-binding domain containing 3                                                   |
| Hspa14     | 0.957 | 1.941269 | 0.0207  | 1448586_at   | heat shock protein 14                                                                          |
| Phip       | 0.957 | 1.941269 | 0.0296  | 1425721_at   | pleckstrin homology domain interacting protein                                                 |
| Sfswap     | 0.958 | 1.942615 | 0.0262  | 1454683_at   | splicing factor, suppressor of white-apricot homolog (Drosophila)                              |
| Pms2       | 0.958 | 1.942615 | 0.0262  | 1423539_at   | postmeiotic segregation increased 2 (S. cerevisiae)                                            |
| Arl13b     | 0.959 | 1.943962 | 0.0149  | 1437021_at   | ADP-ribosylation factor-like 13B                                                               |
| Trip6      | 0.965 | 1.952064 | 0.00682 | 1449041_a_at | thyroid hormone receptor interactor 6                                                          |
| Mtbp       | 0.965 | 1.952064 | 0.0367  | 1448638_at   | Mdm2, transformed 3T3 cell double minute p53 binding protein                                   |
| Prim1      | 0.966 | 1.953417 | 0.0247  | 1449061_a_at | DNA primase, p49 subunit                                                                       |
| 2700097O09 | 0.969 | 1.957483 | 0.00784 | 1428810_at   | RIKEN cDNA 2700097O09 gene                                                                     |
| Yy1        | 0.969 | 1.957483 | 0.0425  | 1422570_at   | YY1 transcription factor                                                                       |
| 2700099C18 | 0.976 | 1.967004 | 0.0327  | 1427141_at   | NDC80 homolog, kinetochore complex component pseudogene                                        |
| Kat2b      | 0.977 | 1.968368 | 0.0446  | 1434037_s_at | K(lysine) acetyltransferase 2B                                                                 |
| Rrm1       | 0.979 | 1.971099 | 0.0471  | 1448127_at   | ribonucleotide reductase M1                                                                    |
| C1galt1c1  | 0.982 | 1.975202 | 0.00929 | 1416655_at   | C1GALT1-specific chaperone 1                                                                   |
| Bcl2l13    | 0.983 | 1.976571 | 0.0178  | 1424406_at   | BCL2-like 13 (apoptosis facilitator)                                                           |
| Mllt4      | 0.984 | 1.977942 | 0.027   | 1436303_at   | myeloid/lymphoid or mixed-lineage leukemia (trithorax homolog, Drosophila); translocated to, 4 |
| Wdr5       | 0.984 | 1.977942 | 0.036   | 1448389_at   | WD repeat domain 5                                                                             |
| Pak4       | 0.985 | 1.979313 | 0.0444  | 1428548_at   | p21 protein (Cdc42/Rac)-activated kinase 4                                                     |
| Gtpbp2     | 0.986 | 1.980686 | 0.0317  | 1416690_at   | GTP binding protein 2                                                                          |
| Rod1       | 0.987 | 1.982059 | 0.0284  | 1424083_at   | ROD1 regulator of differentiation 1 (S. pombe)                                                 |
| Gm608      | 0.992 | 1.98894  | 0.0189  | 1428681_at   | predicted gene 608                                                                             |
| Wbp5       | 0.993 | 1.990319 | 0.0155  | 1451230_a_at | WW domain binding protein 5                                                                    |
| E2f1       | 0.999 | 1.998614 | 0.0149  | 1431875_a_at | E2F transcription factor 1                                                                     |
| Igsf8      | 0.999 | 1.998614 | 0.0228  | 1460675_at   | immunoglobulin superfamily, member 8                                                           |
| Mcl1       | 1.002 | 2.002775 | 0.0116  | 1416881_at   | myeloid cell leukemia sequence 1                                                               |
| LOC1000486 | 1.005 | 2.006943 | 0.0422  | 1459885_s_at | cytochrome c oxidase, subunit VIIc /// cytochrome c oxidase subunit 7C, mitochondrial-like     |
| Comm1d     | 1.009 | 2.012516 | 0.0247  | 1420852_a_at | UDP-GlcNAc:betaGal beta-1,3-N-acetylglucosaminyltransferase 2 /// COMM domain containing 1     |
| Ube2a      | 1.01  | 2.013911 | 0.0117  | 1417609_at   | ubiquitin-conjugating enzyme E2A                                                               |
| Map2k7     | 1.012 | 2.016705 | 0.0088  | 1425513_at   | mitogen-activated protein kinase kinase 7                                                      |
| Ints12     | 1.012 | 2.016705 | 0.0459  | 1428985_at   | integrator complex subunit 12                                                                  |
| Rph3al     | 1.014 | 2.019503 | 0.0317  | 1444409_at   | rabphilin 3A-like (without C2 domains)                                                         |
| Poc5       | 1.016 | 2.022304 | 0.0455  | 1419265_at   | POC5 centriolar protein homolog (Chlamydomonas)                                                |
| Arhgef11   | 1.016 | 2.022304 | 0.0488  | 1434926_at   | Rho guanine nucleotide exchange factor (GEF) 11                                                |
| Kntc1      | 1.019 | 2.026514 | 0.0178  | 1435575_at   | kinetochore associated 1                                                                       |
| Cep152     | 1.019 | 2.026514 | 0.0437  | 1427496_at   | centrosomal protein 152                                                                        |
| Pdpk1      | 1.02  | 2.027919 | 0.0164  | 1416501_at   | 3-phosphoinositide dependent protein kinase 1                                                  |
| Ncoa3      | 1.02  | 2.027919 | 0.0209  | 1422737_at   | nuclear receptor coactivator 3                                                                 |
| Habp4      | 1.021 | 2.029325 | 0.036   | 1430869_a_at | hyaluronic acid binding protein 4                                                              |
| Cicc1      | 1.024 | 2.033549 | 0.0149  | 1437511_x_at | chloride channel CLIC-like 1                                                                   |
| Lin52      | 1.025 | 2.034959 | 0.0456  | 1434161_at   | predicted gene 7020 /// lin-52 homolog (C. elegans)                                            |
| Prpf3      | 1.026 | 2.03637  | 0.0178  | 1424314_at   | PRP3 pre-mRNA processing factor 3 homolog (yeast)                                              |
| Thoc3      | 1.027 | 2.037782 | 0.0463  | 1423971_at   | THO complex 3                                                                                  |
| Wdr53      | 1.028 | 2.039195 | 0.00116 | 1428839_at   | WD repeat domain 53                                                                            |
| Rbm41      | 1.031 | 2.04344  | 0.0335  | 1456027_at   | RNA binding motif protein 41                                                                   |
| Pol1       | 1.032 | 2.044857 | 0.028   | 1448187_at   | polymerase (DNA directed), delta 1, catalytic subunit                                          |
| Rp9        | 1.033 | 2.046275 | 0.0272  | 1418277_at   | retinitis pigmentosa 9 (human)                                                                 |
| Prim2      | 1.035 | 2.049114 | 0.0115  | 1418036_at   | DNA primase, p58 subunit                                                                       |
| Nbn        | 1.035 | 2.049114 | 0.0343  | 1448746_at   | nibrin                                                                                         |
| Rad54b     | 1.036 | 2.050534 | 0.0165  | 1443318_at   | fibrinogen silencer binding protein /// RAD54 homolog B (S. cerevisiae)                        |

|            |       |          |          |              |                                                                                                                              |
|------------|-------|----------|----------|--------------|------------------------------------------------------------------------------------------------------------------------------|
| Zranb2     | 1.039 | 2.054803 | 0.00195  | 1454652_at   | zinc finger, RAN-binding domain containing 2                                                                                 |
| Atl2       | 1.039 | 2.054803 | 0.0115   | 1431197_at   | atlastin GTPase 2                                                                                                            |
| Sclt1      | 1.044 | 2.061937 | 0.046    | 1455608_at   | sodium channel and clathrin linker 1                                                                                         |
| Gm2036     | 1.048 | 2.067661 | 0.0327   | 1424365_at   | RIKEN cDNA 1810037I17 gene /// predicted gene 2036                                                                           |
| Wdr76      | 1.06  | 2.084932 | 0.0205   | 1455674_at   | WD repeat domain 76                                                                                                          |
| Gins2      | 1.062 | 2.087824 | 0.0382   | 1428713_s_at | GINS complex subunit 2 (Psf2 homolog)                                                                                        |
| Man1b1     | 1.062 | 2.087824 | 0.041    | 1452235_at   | mannosidase, alpha, class 1B, member 1                                                                                       |
| Hat1       | 1.064 | 2.09072  | 0.0272   | 1428061_at   | histone aminotransferase 1                                                                                                   |
| Adar       | 1.066 | 2.093621 | 0.016    | 1434268_at   | adenosine deaminase, RNA-specific                                                                                            |
| Brd3       | 1.066 | 2.093621 | 0.0296   | 1460328_at   | bromodomain containing 3                                                                                                     |
| E2f8       | 1.066 | 2.093621 | 0.0367   | 1444319_at   | E2F transcription factor 8                                                                                                   |
| Pik3cd     | 1.069 | 2.097979 | 0.016    | 1422992_s_at | phosphatidylinositol 3-kinase catalytic delta polypeptide                                                                    |
| Kdm5c      | 1.071 | 2.100889 | 0.0189   | 1426497_at   | lysine (K)-specific demethylase 5C                                                                                           |
| Chd1l      | 1.071 | 2.100889 | 0.0272   | 1449415_at   | chromodomain helicase DNA binding protein 1-like                                                                             |
| Ncoa2      | 1.072 | 2.102346 | 0.0463   | 1450458_at   | nuclear receptor coactivator 2                                                                                               |
| Magef1     | 1.073 | 2.103804 | 0.0397   | 1429479_at   | melanoma antigen family F, 1                                                                                                 |
| Ddx20      | 1.075 | 2.106722 | 0.0353   | 1416751_a_at | DEAD (Asp-Glu-Ala-Asp) box polypeptide 20                                                                                    |
| Mcm6       | 1.076 | 2.108183 | 0.0111   | 1416251_at   | minichromosome maintenance deficient 6 (MIS5 homolog, S. pombe) (S. cerevisiae)                                              |
| Gle1       | 1.077 | 2.109645 | 0.00895  | 1440720_s_at | GLE1 RNA export mediator (yeast)                                                                                             |
| 1600002H07 | 1.08  | 2.114036 | 0.0175   | 1428832_at   | RIKEN cDNA 1600002H07 gene                                                                                                   |
| Kidins220  | 1.08  | 2.114036 | 0.024    | 1430449_at   | kinase D-interacting substrate 220                                                                                           |
| Exo1       | 1.087 | 2.124318 | 0.0372   | 1430225_at   | exonuclease 1                                                                                                                |
| Strn       | 1.088 | 2.125791 | 0.0175   | 1422036_at   | striatin, calmodulin binding protein                                                                                         |
| 2310001A20 | 1.09  | 2.12874  | 0.00162  | 1452159_at   | RIKEN cDNA 2310001A20 gene                                                                                                   |
| Peli1      | 1.091 | 2.130216 | 0.0372   | 1431061_s_at | pellino 1                                                                                                                    |
| Zfp292     | 1.092 | 2.131693 | 0.0294   | 1430216_at   | zinc finger protein 292                                                                                                      |
| Chrd       | 1.093 | 2.133172 | 0.024    | 1417304_at   | chordin                                                                                                                      |
| Usp12      | 1.097 | 2.139094 | 0.046    | 1425805_a_at | ubiquitin specific peptidase 12                                                                                              |
| Setx       | 1.107 | 2.153973 | 0.000333 | 1458080_at   | senataxin                                                                                                                    |
| Lin7c      | 1.11  | 2.158456 | 0.0203   | 1449262_s_at | lin-7 homolog C (C. elegans)                                                                                                 |
| Cep76      | 1.111 | 2.159953 | 0.0306   | 1437254_at   | centrosomal protein 76                                                                                                       |
| Mis18bp1   | 1.116 | 2.167452 | 0.0162   | 1458374_at   | MIS18 binding protein 1                                                                                                      |
| Cdc42se1   | 1.116 | 2.167452 | 0.0409   | 1428131_a_at | CDC42 small effector 1                                                                                                       |
| Cbl        | 1.118 | 2.170459 | 0.0402   | 1450457_at   | Casitas B-lineage lymphoma                                                                                                   |
| Nusap1     | 1.119 | 2.171964 | 0.026    | 1416309_at   | nucleolar and spindle associated protein 1                                                                                   |
| Sap25      | 1.12  | 2.17347  | 0.00813  | 1424879_at   | predicted gene 20605 /// leucine-rich repeats and calponin homology (CH) domain containing 4 /// sin3 associated polypeptide |
| Taf3       | 1.121 | 2.174977 | 0.0253   | 1440187_at   | TAF3 RNA polymerase II, TATA box binding protein (TBP)-associated factor                                                     |
| Daxx       | 1.125 | 2.181015 | 0.00141  | 1419026_at   | Fas death domain-associated protein                                                                                          |
| Wdtk1      | 1.126 | 2.182528 | 0.0104   | 1434560_at   | WD and tetratricopeptide repeats 1                                                                                           |
| Mknk2      | 1.126 | 2.182528 | 0.0363   | 1449029_at   | MAP kinase-interacting serine/threonine kinase 2                                                                             |
| Zfp598     | 1.137 | 2.199232 | 0.0204   | 1460691_at   | zinc finger protein 598                                                                                                      |
| Tubb5      | 1.139 | 2.202283 | 0.0377   | 1455719_at   | tubulin, beta 5 class I                                                                                                      |
| Arfgef1    | 1.14  | 2.20381  | 0.0262   | 1437104_at   | ADP-ribosylation factor guanine nucleotide-exchange factor 1(brefeldin A-inhibited)                                          |
| 2310008H04 | 1.148 | 2.216065 | 0.0237   | 1451171_at   | RIKEN cDNA 2310008H04 gene                                                                                                   |
| Ankrd32    | 1.153 | 2.223758 | 0.00902  | 1423577_at   | ankyrin repeat domain 32                                                                                                     |
| Ing3       | 1.156 | 2.228387 | 0.0419   | 1450760_a_at | inhibitor of growth family, member 3                                                                                         |
| Tfeb       | 1.159 | 2.233026 | 0.00375  | 1422566_at   | transcription factor EB                                                                                                      |
| Tbc1d25    | 1.16  | 2.234574 | 0.0115   | 1456113_at   | TBC1 domain family, member 25                                                                                                |
| Ncaph2     | 1.166 | 2.243887 | 0.0197   | 1423699_at   | non-SMC condensin II complex, subunit H2                                                                                     |
| Yip6       | 1.166 | 2.243887 | 0.0476   | 1455111_at   | Yip1 domain family, member 6                                                                                                 |
| Ppp1r13l   | 1.168 | 2.247    | 0.0475   | 1439530_a_at | protein phosphatase 1, regulatory (inhibitor) subunit 13 like                                                                |
| Mphosph9   | 1.171 | 2.251677 | 0.0293   | 1431053_at   | M-phase phosphoprotein 9                                                                                                     |
| Zmynd19    | 1.173 | 2.254801 | 0.0278   | 1419522_at   | zinc finger, MYND domain containing 19                                                                                       |
| Lgmn       | 1.173 | 2.254801 | 0.0484   | 1448883_at   | legumain                                                                                                                     |
| Slc25a25   | 1.176 | 2.259494 | 0.014    | 1424735_at   | solute carrier family 25 (mitochondrial carrier, phosphate carrier), member 25                                               |
| Prkci      | 1.177 | 2.261061 | 0.00141  | 1448695_at   | protein kinase C, iota                                                                                                       |
| Tcerg1     | 1.179 | 2.264198 | 0.0317   | 1450100_a_at | transcription elongation regulator 1 (CA150)                                                                                 |
| Hmgb2      | 1.18  | 2.265768 | 0.024    | 1452534_a_at | high mobility group box 2                                                                                                    |
| Ect2       | 1.181 | 2.267339 | 0.0344   | 1419513_a_at | ect2 oncogene                                                                                                                |
| Ccdc77     | 1.184 | 2.272059 | 0.00964  | 1425734_a_at | coiled-coil domain containing 77                                                                                             |



|            |       |          |         |              |                                                                                               |
|------------|-------|----------|---------|--------------|-----------------------------------------------------------------------------------------------|
| Ncaph      | 1.187 | 2.276788 | 0.0133  | 1423920_at   | non-SMC condensin I complex, subunit H                                                        |
| Prune      | 1.188 | 2.278367 | 0.0178  | 1434138_at   | prune homolog (Drosophila)                                                                    |
| Iqgap3     | 1.191 | 2.283109 | 0.0195  | 1434850_at   | IQ motif containing GTPase activating protein 3                                               |
| Rttn       | 1.191 | 2.283109 | 0.0437  | 1436588_at   | rotatin                                                                                       |
| Mcm7       | 1.194 | 2.287862 | 0.0197  | 1416031_s_at | minichromosome maintenance deficient 7 (S. cerevisiae)                                        |
| Taf4a      | 1.198 | 2.294214 | 0.00592 | 1452438_s_at | TAF4A RNA polymerase II, TATA box binding protein (TBP)-associated factor                     |
| Odf2l      | 1.204 | 2.303775 | 0.0185  | 1431861_a_at | outer dense fiber of sperm tails 2-like                                                       |
| Gpsm2      | 1.204 | 2.303775 | 0.0291  | 1424895_at   | G-protein signalling modulator 2 (AGS3-like, C. elegans)                                      |
| E130303B06 | 1.205 | 2.305373 | 0.013   | 1434981_at   | RIKEN cDNA E130303B06 gene                                                                    |
| Haus5      | 1.205 | 2.305373 | 0.0272  | 1452715_at   | HAUS augmin-like complex, subunit 5                                                           |
| Ero1lb     | 1.207 | 2.308571 | 0.0484  | 1425705_a_at | ERO1-like beta (S. cerevisiae)                                                                |
| Ska1       | 1.208 | 2.310172 | 0.0115  | 1450496_a_at | spindle and kinetochore associated complex subunit 1                                          |
| Srgap2     | 1.208 | 2.310172 | 0.0273  | 1434407_at   | SLIT-ROBO Rho GTPase activating protein 2                                                     |
| 2700049A03 | 1.209 | 2.311773 | 0.0071  | 1437248_at   | RIKEN cDNA 2700049A03 gene                                                                    |
| Samhd1     | 1.212 | 2.316586 | 0.0188  | 1434438_at   | SAM domain and HD domain, 1                                                                   |
| Ttll7      | 1.212 | 2.316586 | 0.0296  | 1430615_at   | tubulin tyrosine ligase-like family, member 7                                                 |
| Cep350     | 1.214 | 2.319799 | 0.0182  | 1431102_at   | centrosomal protein 350                                                                       |
| Xpr1       | 1.215 | 2.321408 | 0.0421  | 1426053_a_at | xenotropic and polytropic retrovirus receptor 1                                               |
| 2610021K21 | 1.215 | 2.321408 | 0.0465  | 1431667_s_at | RIKEN cDNA 2610021K21 gene                                                                    |
| Pole2      | 1.219 | 2.327853 | 0.0484  | 1427094_at   | polymerase (DNA directed), epsilon 2 (p59 subunit)                                            |
| Casp2      | 1.223 | 2.334316 | 0.00265 | 1448165_at   | caspase 2                                                                                     |
| Elf4       | 1.228 | 2.34242  | 0.00375 | 1421337_at   | E74-like factor 4 (ets domain transcription factor)                                           |
| Foxp4      | 1.229 | 2.344045 | 0.0272  | 1431088_at   | forkhead box P4                                                                               |
| A830080D01 | 1.23  | 2.34567  | 0.0294  | 1434910_at   | RIKEN cDNA A830080D01 gene                                                                    |
| Zc3h15     | 1.231 | 2.347296 | 0.00075 | 1446512_at   | zinc finger CCCH-type containing 15                                                           |
| Dgkd       | 1.234 | 2.352183 | 0.0456  | 1454655_at   | diacylglycerol kinase, delta                                                                  |
| Crtc2      | 1.235 | 2.353813 | 0.00585 | 1429373_x_at | CREB regulated transcription coactivator 2                                                    |
| Dck        | 1.238 | 2.358713 | 0.03    | 1428838_a_at | deoxycytidine kinase                                                                          |
| Snx16      | 1.239 | 2.360349 | 0.0165  | 1438803_s_at | sorting nexin 16                                                                              |
| Ap1ar      | 1.244 | 2.368543 | 0.00138 | 1426234_s_at | adaptor-related protein complex 1 associated regulatory protein                               |
| Rbbp8      | 1.248 | 2.375119 | 0.0155  | 1427062_at   | retinoblastoma binding protein 8                                                              |
| Zdhhc18    | 1.256 | 2.388326 | 0.0464  | 1455518_at   | zinc finger, DHHC domain containing 18                                                        |
| Usp7       | 1.257 | 2.389982 | 0.00611 | 1437118_at   | ubiquitin specific peptidase 7                                                                |
| Rad51ap1   | 1.257 | 2.389982 | 0.0157  | 1417939_at   | RAD51 associated protein 1                                                                    |
| Timeless   | 1.257 | 2.389982 | 0.0462  | 1417586_at   | timeless homolog (Drosophila)                                                                 |
| Pkp4       | 1.259 | 2.393298 | 0.0199  | 1452209_at   | plakophilin 4                                                                                 |
| Nras       | 1.263 | 2.399943 | 0.00138 | 1454060_a_at | neuroblastoma ras oncogene                                                                    |
| Plk4       | 1.269 | 2.409945 | 0.0201  | 1419838_s_at | polo-like kinase 4                                                                            |
| Pip5k1a    | 1.271 | 2.413288 | 0.0216  | 1426009_a_at | phosphatidylinositol-4-phosphate 5-kinase, type 1 alpha                                       |
| Phka2      | 1.275 | 2.419988 | 0.0155  | 1434518_at   | phosphorylase kinase alpha 2                                                                  |
| Lmtk2      | 1.278 | 2.425026 | 0.00849 | 1455018_at   | lemur tyrosine kinase 2                                                                       |
| G2e3       | 1.285 | 2.436821 | 0.0451  | 1434700_at   | G2/M-phase specific E3 ubiquitin ligase                                                       |
| Mcm4       | 1.286 | 2.43851  | 0.00168 | 1416214_at   | minichromosome maintenance deficient 4 homolog (S. cerevisiae)                                |
| Arhgap5    | 1.286 | 2.43851  | 0.0335  | 1423194_at   | Rho GTPase activating protein 5                                                               |
| Lpcat4     | 1.294 | 2.45207  | 0.0268  | 1440207_at   | lysophosphatidylcholine acyltransferase 4                                                     |
| Fbxo45     | 1.296 | 2.455471 | 0.0197  | 1428742_at   | F-box protein 45                                                                              |
| Sgms2      | 1.296 | 2.455471 | 0.0262  | 1428663_at   | sphingomyelin synthase 2                                                                      |
| Hdac6      | 1.296 | 2.455471 | 0.0278  | 1448928_at   | histone deacetylase 6                                                                         |
| Trpm7      | 1.298 | 2.458878 | 0.038   | 1416801_at   | transient receptor potential cation channel, subfamily M, member 7                            |
| Larp7      | 1.299 | 2.460583 | 0.0164  | 1429558_a_at | La ribonucleoprotein domain family, member 7                                                  |
| 2610039C10 | 1.3   | 2.462289 | 0.00198 | 1453314_x_at | RIKEN cDNA 2610039C10 gene                                                                    |
| Nup205     | 1.301 | 2.463996 | 0.024   | 1430343_at   | nucleoporin 205                                                                               |
| Rp2h       | 1.304 | 2.469125 | 0.0311  | 1419585_at   | retinitis pigmentosa 2 homolog (human)                                                        |
| Numb       | 1.304 | 2.469125 | 0.0487  | 1425368_a_at | numb gene homolog (Drosophila)                                                                |
| Pebp1      | 1.31  | 2.479415 | 0.028   | 1453107_s_at | RIKEN cDNA 4933413G19 gene /// forkhead box M1 /// phosphatidylethanolamine binding protein 1 |
| Cdc45      | 1.312 | 2.482855 | 0.0245  | 1416575_at   | cell division cycle 45                                                                        |
| Rfc4       | 1.314 | 2.486299 | 0.00745 | 1424321_at   | replication factor C (activator 1) 4                                                          |
| Dclre1b    | 1.315 | 2.488023 | 0.0178  | 1440383_at   | DNA cross-link repair 1B, PSO2 homolog (S. cerevisiae)                                        |
| Homer1     | 1.32  | 2.496661 | 0.0225  | 1439662_at   | homer homolog 1 (Drosophila)                                                                  |
| BC055324   | 1.321 | 2.498392 | 0.028   | 1437186_at   | cDNA sequence BC055324                                                                        |

|            |       |          |          |              |                                                                                                      |
|------------|-------|----------|----------|--------------|------------------------------------------------------------------------------------------------------|
| Pkmyt1     | 1.331 | 2.51577  | 0.013    | 1418481_at   | protein kinase, membrane associated tyrosine/threonine 1                                             |
| Rfxap      | 1.334 | 2.521007 | 0.0386   | 1418859_at   | regulatory factor X-associated protein                                                               |
| Fam107b    | 1.337 | 2.526255 | 0.0435   | 1416893_at   | family with sequence similarity 107, member B                                                        |
| Aqr        | 1.343 | 2.536783 | 0.00116  | 1430971_a_at | aquarius                                                                                             |
| Enc1       | 1.347 | 2.543826 | 0.00929  | 1420964_at   | ectodermal-neural cortex 1                                                                           |
| Dgcr14     | 1.349 | 2.547355 | 0.00374  | 1416822_at   | DiGeorge syndrome critical region gene 14                                                            |
| Ppip5k1    | 1.354 | 2.556199 | 0.0273   | 1460584_at   | diphosphoinositol pentakisphosphate kinase 1                                                         |
| Nkap       | 1.366 | 2.577549 | 0.026    | 1419763_at   | NFKB activating protein                                                                              |
| Chaf1b     | 1.368 | 2.581125 | 0.00727  | 1423877_at   | chromatin assembly factor 1, subunit B (p60)                                                         |
| Depdc1a    | 1.368 | 2.581125 | 0.0447   | 1424292_at   | DEP domain containing 1a                                                                             |
| C2cd2      | 1.371 | 2.586498 | 0.0293   | 1437731_at   | C2 calcium-dependent domain containing 2                                                             |
| Ammecr1    | 1.373 | 2.590086 | 0.0329   | 1450546_at   | Alport syndrome, mental retardation, midface hypoplasia and elliptocytosis chromosomal region gene 1 |
| Cpox       | 1.376 | 2.595478 | 0.00624  | 1422492_at   | coproporphyrinogen oxidase                                                                           |
| 4930422G04 | 1.378 | 2.599078 | 0.0227   | 1453038_at   | RIKEN cDNA 4930422G04 gene                                                                           |
| Zfp518b    | 1.378 | 2.599078 | 0.0228   | 1441134_at   | zinc finger protein 518B                                                                             |
| Mms22l     | 1.379 | 2.60088  | 0.013    | 1427147_at   | MMS22-like, DNA repair protein                                                                       |
| Ccdc82     | 1.379 | 2.60088  | 0.0155   | 1421383_at   | coiled-coil domain containing 82                                                                     |
| Cep110     | 1.38  | 2.602684 | 0.00141  | 1421004_at   | centrosomal protein 110                                                                              |
| Chtf18     | 1.382 | 2.606294 | 0.0273   | 1452098_at   | CTF18, chromosome transmission fidelity factor 18                                                    |
| Lig1       | 1.385 | 2.61172  | 0.00585  | 1416641_at   | ligase I, DNA, ATP-dependent                                                                         |
| Setdb2     | 1.387 | 2.615343 | 0.00328  | 1436120_at   | SET domain, bifurcated 2                                                                             |
| Zfp367     | 1.387 | 2.615343 | 0.0344   | 1438772_at   | zinc finger protein 367                                                                              |
| Elf2       | 1.388 | 2.617156 | 0.00784  | 1428045_a_at | E74-like factor 2                                                                                    |
| A030009H04 | 1.39  | 2.620787 | 0.0278   | 1448952_at   | RIKEN cDNA A030009H04 gene                                                                           |
| Raver1     | 1.393 | 2.626242 | 0.0343   | 1427110_at   | ribonucleoprotein, PTB-binding 1                                                                     |
| Pde7a      | 1.398 | 2.63536  | 0.016    | 1451839_a_at | phosphodiesterase 7A                                                                                 |
| Lfng       | 1.402 | 2.642677 | 7.26E-05 | 1449943_at   | LFNG O-fucosylpeptide 3-beta-N-acetylglucosaminyltransferase                                         |
| Tcf19      | 1.405 | 2.648178 | 0.0444   | 1423809_at   | transcription factor 19                                                                              |
| Mcm2       | 1.407 | 2.651852 | 0.00195  | 1448777_at   | minichromosome maintenance deficient 2 mitotin ( <i>S. cerevisiae</i> )                              |
| Pde4dip    | 1.408 | 2.65369  | 0.0476   | 1460426_at   | phosphodiesterase 4D interacting protein (myomegalin)                                                |
| Cdk16      | 1.417 | 2.670297 | 0.0278   | 1460169_a_at | cyclin-dependent kinase 16                                                                           |
| Cdc25b     | 1.419 | 2.674001 | 0.0273   | 1421963_a_at | cell division cycle 25B                                                                              |
| Eif4g1     | 1.421 | 2.677711 | 0.0395   | 1438686_at   | eukaryotic translation initiation factor 4, gamma 1                                                  |
| Rel1       | 1.422 | 2.679567 | 0.00138  | 1427243_at   | RELT-like 1                                                                                          |
| Kifc1      | 1.424 | 2.683284 | 0.0477   | 1449877_s_at | kinesin family member C1                                                                             |
| Hdgf       | 1.435 | 2.703822 | 0.00819  | 1415888_at   | hepatoma-derived growth factor                                                                       |
| Nktr       | 1.437 | 2.707573 | 0.00141  | 1423249_at   | natural killer tumor recognition sequence                                                            |
| Cdt1       | 1.437 | 2.707573 | 0.0463   | 1424144_at   | chromatin licensing and DNA replication factor 1                                                     |
| Fanci      | 1.44  | 2.713209 | 0.00495  | 1425941_a_at | Fanconi anemia, complementation group I                                                              |
| Slc25a15   | 1.445 | 2.722628 | 0.0262   | 1420966_at   | solute carrier family 25 (mitochondrial carrier ornithine transporter), member 15                    |
| Mtmr1      | 1.446 | 2.724516 | 0.0332   | 1421879_at   | myotubularin related protein 1                                                                       |
| Senp2      | 1.449 | 2.730187 | 0.00871  | 1455327_at   | SUMO/sentrin specific peptidase 2                                                                    |
| Sgol1      | 1.451 | 2.733975 | 0.0203   | 1439510_at   | shugoshin-like 1 ( <i>S. pombe</i> )                                                                 |
| 4930534B04 | 1.458 | 2.747272 | 0.0344   | 1430815_at   | RIKEN cDNA 4930534B04 gene                                                                           |
| Dna2       | 1.461 | 2.752991 | 0.00784  | 1452210_at   | DNA replication helicase 2 homolog (yeast)                                                           |
| Pld1       | 1.468 | 2.766381 | 0.00138  | 1437112_at   | phospholipase D1                                                                                     |
| BC046331   | 1.469 | 2.768299 | 0.0156   | 1435156_at   | cDNA sequence BC046331                                                                               |
| Pnn        | 1.486 | 2.801113 | 0.0104   | 1423325_at   | pinin                                                                                                |
| Pla2g12a   | 1.487 | 2.803055 | 0.0157   | 1452026_a_at | phospholipase A2, group XIIA                                                                         |
| Pola1      | 1.497 | 2.822552 | 0.0463   | 1419397_at   | polymerase (DNA directed), alpha 1                                                                   |
| Rif        | 1.502 | 2.832351 | 0.0303   | 1439555_at   | rearranged L-myc fusion sequence                                                                     |
| Lmnb1      | 1.505 | 2.838247 | 0.0189   | 1423521_at   | lamin B1                                                                                             |
| Casc5      | 1.506 | 2.840215 | 0.00599  | 1438833_at   | cancer susceptibility candidate 5                                                                    |
| 1110007C09 | 1.509 | 2.846127 | 0.0357   | 1431359_a_at | RIKEN cDNA 1110007C09 gene                                                                           |
| Msh3       | 1.521 | 2.869899 | 0.00671  | 1422261_a_at | mutS homolog 3 ( <i>E. coli</i> )                                                                    |
| Smc4       | 1.522 | 2.871889 | 0.0162   | 1427276_at   | structural maintenance of chromosomes 4                                                              |
| Terf1      | 1.534 | 2.895876 | 0.0328   | 1431332_a_at | telomeric repeat binding factor 1                                                                    |
| Smpd4      | 1.54  | 2.907945 | 0.0146   | 1437024_at   | sphingomyelin phosphodiesterase 4                                                                    |
| Ppp1r15b   | 1.545 | 2.918041 | 0.0149   | 1436366_at   | protein phosphatase 1, regulatory (inhibitor) subunit 15b                                            |
| Abhd10     | 1.548 | 2.924115 | 0.0455   | 1427958_at   | abhydrolase domain containing 10                                                                     |

|            |       |          |          |              |                                                                                                        |
|------------|-------|----------|----------|--------------|--------------------------------------------------------------------------------------------------------|
| Ptar1      | 1.552 | 2.932234 | 0.0357   | 1432162_s_at | protein prenyltransferase alpha subunit repeat containing 1                                            |
| D330028D13 | 1.562 | 2.952629 | 0.0247   | 1434428_at   | RIKEN cDNA D330028D13 gene                                                                             |
| Usp49      | 1.565 | 2.958775 | 0.00301  | 1453037_at   | ubiquitin specific peptidase 49                                                                        |
| Rbl1       | 1.569 | 2.966999 | 0.00116  | 1424156_at   | retinoblastoma-like 1 (p107)                                                                           |
| Ccdc21     | 1.577 | 2.983488 | 0.0448   | 1451212_at   | coiled-coil domain containing 21                                                                       |
| Paqr4      | 1.578 | 2.985557 | 0.0485   | 1423101_at   | progesterone and adipoQ receptor family member IV                                                      |
| Glis2      | 1.585 | 3.000078 | 0.00245  | 1416599_at   | GLIS family zinc finger 2                                                                              |
| Tube1      | 1.587 | 3.00424  | 0.00964  | 1431873_a_at | epsilon-tubulin 1                                                                                      |
| Donson     | 1.595 | 3.020945 | 0.00116  | 1426739_at   | downstream neighbor of SON                                                                             |
| Zfp664     | 1.601 | 3.033535 | 0.0237   | 1437047_at   | zinc finger protein 664                                                                                |
| Mybl2      | 1.601 | 3.033535 | 0.0332   | 1454946_at   | myeloblastosis oncogene-like 2                                                                         |
| Fanca      | 1.605 | 3.041958 | 0.00853  | 1452513_a_at | Fanconi anemia, complementation group A                                                                |
| Nfkbiz     | 1.606 | 3.044067 | 0.0492   | 1417483_at   | nuclear factor of kappa light polypeptide gene enhancer in B cells inhibitor, zeta                     |
| Rad51c     | 1.608 | 3.04829  | 0.014    | 1423026_at   | RAD51 homolog c ( <i>S. cerevisiae</i> )                                                               |
| Baz1b      | 1.61  | 3.052518 | 0.0255   | 1450068_at   | bromodomain adjacent to zinc finger domain, 1B                                                         |
| Zfyve20    | 1.614 | 3.060994 | 0.0195   | 1429517_at   | zinc finger, FYVE domain containing 20                                                                 |
| Eif5a2     | 1.623 | 3.080149 | 0.0352   | 1434593_at   | eukaryotic translation initiation factor 5A2                                                           |
| Hjurf      | 1.626 | 3.08656  | 0.00142  | 1442202_at   | Holliday junction recognition protein                                                                  |
| Anp32a     | 1.632 | 3.099424 | 0.0195   | 1450407_a_at | acidic (leucine-rich) nuclear phosphoprotein 32 family, member A                                       |
| Arid5a     | 1.632 | 3.099424 | 0.03     | 1451340_at   | AT rich interactive domain 5A (MRF1-like)                                                              |
| Tonl       | 1.635 | 3.105876 | 0.00614  | 1428661_at   | tonsoku-like, DNA repair protein                                                                       |
| Gltp       | 1.646 | 3.129647 | 0.0163   | 1419027_s_at | glycolipid transfer protein                                                                            |
| Ar15b      | 1.652 | 3.14269  | 0.0339   | 1437884_at   | ADP-ribosylation factor-like 5B                                                                        |
| Ncapd3     | 1.653 | 3.144869 | 0.000657 | 1430782_at   | non-SMC condensin II complex, subunit D3                                                               |
| Cenpf      | 1.653 | 3.144869 | 0.00579  | 1458447_at   | centromere protein F                                                                                   |
| Kctd6      | 1.654 | 3.14705  | 0.0123   | 1428186_at   | potassium channel tetramerisation domain containing 6                                                  |
| Piga       | 1.654 | 3.14705  | 0.0289   | 1453497_a_at | phosphatidylinositol glycan anchor biosynthesis, class A                                               |
| Intu       | 1.663 | 3.166743 | 0.0202   | 1458595_at   | inturned planar cell polarity effector homolog ( <i>Drosophila</i> )                                   |
| Cyp39a1    | 1.673 | 3.18877  | 0.0421   | 1418780_at   | cytochrome P450, family 39, subfamily a, polypeptide 1                                                 |
| 2010317E24 | 1.686 | 3.217633 | 0.00521  | 1429404_at   | RIKEN cDNA 2010317E24 gene                                                                             |
| Elp4       | 1.686 | 3.217633 | 0.0162   | 1416987_at   | elongation protein 4 homolog ( <i>S. cerevisiae</i> )                                                  |
| Arhgap12   | 1.698 | 3.244509 | 0.0497   | 1431052_at   | Rho GTPase activating protein 12                                                                       |
| Trim59     | 1.708 | 3.267076 | 0.0202   | 1431430_s_at | tripartite motif-containing 59                                                                         |
| Prkx       | 1.712 | 3.276147 | 0.0264   | 1424287_at   | protein kinase, X-linked                                                                               |
| Bcl3       | 1.713 | 3.278418 | 0.00495  | 1418133_at   | B cell leukemia/lymphoma 3                                                                             |
| MLL1       | 1.727 | 3.310387 | 0.0317   | 1421060_at   | myeloid/lymphoid or mixed-lineage leukemia (trithorax homolog, <i>Drosophila</i> ); translocated to, 1 |
| Arnt       | 1.745 | 3.351949 | 0.0148   | 1421721_a_at | aryl hydrocarbon receptor nuclear translocator                                                         |
| Wdr47      | 1.747 | 3.356599 | 9.24E-07 | 1437257_at   | WD repeat domain 47                                                                                    |
| Ptpn21     | 1.752 | 3.368252 | 0.0385   | 1419054_a_at | protein tyrosine phosphatase, non-receptor type 21                                                     |
| Dusp8      | 1.757 | 3.379946 | 0.000798 | 1428864_at   | dual specificity phosphatase 8                                                                         |
| Comt       | 1.758 | 3.382289 | 0.00141  | 1418701_at   | catechol-O-methyltransferase                                                                           |
| Foxm1      | 1.762 | 3.39168  | 0.00683  | 1448833_at   | forkhead box M1                                                                                        |
| Parp12     | 1.794 | 3.46775  | 0.0354   | 1426774_at   | poly (ADP-ribose) polymerase family, member 12                                                         |
| Xiap       | 1.813 | 3.513722 | 0.00138  | 1421394_a_at | X-linked inhibitor of apoptosis                                                                        |
| Rif1       | 1.815 | 3.518596 | 0.000647 | 1442939_at   | Rap1 interacting factor 1 homolog ( <i>yeast</i> )                                                     |
| Mcm3       | 1.819 | 3.528365 | 0.0173   | 1426652_at   | minichromosome maintenance deficient 3 ( <i>S. cerevisiae</i> )                                        |
| Tnfrsf81   | 1.829 | 3.552907 | 0.0344   | 1449125_at   | tumor necrosis factor, alpha-induced protein 8-like 1                                                  |
| Setdb1     | 1.833 | 3.562772 | 0.00585  | 1416670_at   | SET domain, bifurcated 1                                                                               |
| Slc16a4    | 1.847 | 3.597513 | 0.0296   | 1456914_at   | Solute carrier family 16 (monocarboxylic acid transporters), member 4                                  |
| 2900054C01 | 1.848 | 3.600008 | 0.0249   | 1429625_at   | RIKEN cDNA 2900054C01 gene                                                                             |
| Ercc6l     | 1.882 | 3.685857 | 0.0133   | 1444024_at   | excision repair cross-complementing rodent repair deficiency complementation group 6 - like            |
| Zfx        | 1.901 | 3.73472  | 0.0227   | 1449512_a_at | zinc finger protein X-linked                                                                           |
| Celf4      | 1.924 | 3.794737 | 0.0319   | 1426930_at   | CUGBP, Elav-like family member 4                                                                       |
| Syt12      | 1.928 | 3.805273 | 0.0183   | 1422878_at   | synaptotagmin XII                                                                                      |
| Nup188     | 1.932 | 3.815838 | 0.0116   | 1442314_at   | nucleoporin 188                                                                                        |
| Dusp6      | 1.938 | 3.831741 | 0.0211   | 1415834_at   | dual specificity phosphatase 6                                                                         |
| Pfkfb      | 1.967 | 3.909543 | 0.00603  | 1430634_a_at | phosphofructokinase, platelet                                                                          |
| Rbmx2      | 1.967 | 3.909543 | 0.0189   | 1424705_at   | RNA binding motif protein, X-linked 2                                                                  |
| Cbx7       | 1.967 | 3.909543 | 0.0203   | 1433557_at   | chromobox 7                                                                                            |
| Smc1a      | 1.99  | 3.97237  | 0.00636  | 1417832_at   | structural maintenance of chromosomes 1A                                                               |

|            |       |          |          |              |                                                                                                                  |
|------------|-------|----------|----------|--------------|------------------------------------------------------------------------------------------------------------------|
| Mpp7       | 1.991 | 3.975124 | 0.00375  | 1432216_s_at | membrane protein, palmitoylated 7 (MAGUK p55 subfamily member 7)                                                 |
| Nrm        | 2     | 4        | 0.00593  | 1417971_at   | nurim (nuclear envelope membrane protein)                                                                        |
| Tnfaip3    | 2.012 | 4.03341  | 0.0285   | 1450829_at   | tumor necrosis factor, alpha-induced protein 3                                                                   |
| Rprd1a     | 2.019 | 4.053028 | 0.0228   | 1438065_at   | regulation of nuclear pre-mRNA domain containing 1A                                                              |
| Ccdc120    | 2.026 | 4.072741 | 0.0197   | 1428066_at   | coiled-coil domain containing 120                                                                                |
| Arrb2      | 2.029 | 4.081219 | 0.00195  | 1451987_at   | arrestin, beta 2                                                                                                 |
| BC006779   | 2.032 | 4.089714 | 0.0273   | 1435454_a_at | cDNA sequence BC006779                                                                                           |
| Rem1       | 2.09  | 4.257481 | 0.0403   | 1450158_at   | rad and gem related GTP binding protein 1                                                                        |
| Atp11c     | 2.102 | 4.293041 | 0.0196   | 1442367_at   | ATPase, class VI, type 11C                                                                                       |
| Taf1       | 2.132 | 4.383247 | 0.00473  | 1447417_at   | TAF1 RNA polymerase II, TATA box binding protein (TBP)-associated factor                                         |
| Rps6ka3    | 2.171 | 4.503354 | 0.00261  | 1452383_at   | ribosomal protein S6 kinase polypeptide 3                                                                        |
| Mir1199    | 2.196 | 4.582072 | 0.0228   | 1440194_at   | microRNA 1199                                                                                                    |
| Ptprk      | 2.264 | 4.803214 | 0.0273   | 1431680_a_at | protein tyrosine phosphatase, receptor type, K                                                                   |
| Bhlhe40    | 2.281 | 4.860147 | 0.0078   | 1418025_at   | basic helix-loop-helix family, member e40                                                                        |
| Herc6      | 2.29  | 4.890561 | 0.04     | 1432026_a_at | hect domain and RLD 6                                                                                            |
| Rpia       | 2.299 | 4.921165 | 0.0311   | 1418337_at   | ribose 5-phosphate isomerase A                                                                                   |
| Clic5      | 2.342 | 5.07005  | 0.0385   | 1439505_at   | chloride intracellular channel 5                                                                                 |
| Sema4a     | 2.377 | 5.194554 | 0.00871  | 1448110_at   | sema domain, immunoglobulin domain (Ig), transmembrane domain (TM) and short cytoplasmic domain, (semaphorin) 4A |
| Rbm38      | 2.455 | 5.483131 | 0.024    | 1421265_a_at | RNA binding motif protein 38                                                                                     |
| Gabpb2     | 2.459 | 5.498355 | 9.24E-07 | 1440868_at   | GA repeat binding protein, beta 2                                                                                |
| Stat1      | 2.474 | 5.555821 | 0.0449   | 1450033_a_at | signal transducer and activator of transcription 1                                                               |
| Tspan15    | 2.517 | 5.723906 | 0.00585  | 1424653_at   | tetraspanin 15                                                                                                   |
| BB182297   | 2.551 | 5.860403 | 0.00495  | 1436585_at   | expressed sequence BB182297                                                                                      |
| Agrn       | 2.559 | 5.892991 | 0.048    | 1426670_at   | agrin                                                                                                            |
| Dusp5      | 2.636 | 6.216058 | 0.0228   | 1437199_at   | dual specificity phosphatase 5                                                                                   |
| Aspm       | 2.67  | 6.364292 | 0.00138  | 1441520_at   | asp (abnormal spindle)-like, microcephaly associated (Drosophila)                                                |
| Slfn9      | 2.702 | 6.507034 | 0.014    | 1436472_at   | schlafen 9                                                                                                       |
| Syce2      | 2.827 | 7.09597  | 0.00863  | 1429270_a_at | synaptonemal complex central element protein 2                                                                   |
| Irf9       | 2.944 | 7.69542  | 0.00682  | 1421322_a_at | interferon regulatory factor 9                                                                                   |
| Gch1       | 3.026 | 8.145482 | 0.0209   | 1420499_at   | GTP cyclohydrolase 1                                                                                             |
| Igf2bp1    | 3.066 | 8.374482 | 0.0175   | 1418761_at   | insulin-like growth factor 2 mRNA binding protein 1                                                              |
| Gcnt2      | 3.085 | 8.485502 | 0.0149   | 1430826_s_at | glucosaminyl (N-acetyl) transferase 2, I-branching enzyme                                                        |
| Atf3       | 3.141 | 8.821353 | 0.0343   | 1449363_at   | activating transcription factor 3                                                                                |
| Bst2       | 3.288 | 9.767572 | 0.0459   | 1424921_at   | bone marrow stromal cell antigen 2                                                                               |
| Fgf18      | 3.34  | 10.12605 | 0.0216   | 1449545_at   | fibroblast growth factor 18                                                                                      |
| Ccl5       | 3.399 | 10.54875 | 0.0372   | 1418126_at   | chemokine (C-C motif) ligand 5                                                                                   |
| Ano1       | 3.411 | 10.63686 | 0.0493   | 1459713_s_at | anoctamin 1, calcium activated chloride channel                                                                  |
| 5730508B09 | 3.431 | 10.78534 | 0.000798 | 1429678_at   | RIKEN cDNA 5730508B09 gene                                                                                       |
| Gpr64      | 3.536 | 11.59957 | 0.0355   | 1438350_at   | G protein-coupled receptor 64                                                                                    |
| Gm20559    | 3.591 | 12.05032 | 0.0392   | 1436172_at   | predicted gene, 20559                                                                                            |
| 2210011C24 | 3.801 | 13.93847 | 0.0184   | 1429953_at   | RIKEN cDNA 2210011C24 gene                                                                                       |
| Ucp2       | 3.837 | 14.29065 | 0.0182   | 1448188_at   | uncoupling protein 2 (mitochondrial, proton carrier)                                                             |
| Cxcl10     | 3.962 | 15.58407 | 0.00141  | 1418930_at   | chemokine (C-X-C motif) ligand 10                                                                                |
| Oasl2      | 4.074 | 16.8421  | 0.0216   | 1453196_a_at | 2'-5' oligoadenylate synthetase-like 2                                                                           |
| Neurl1b    | 4.134 | 17.55731 | 0.00075  | 1435564_at   | neutralized homolog 1b (Drosophila)                                                                              |
| Isg15      | 4.3   | 19.69831 | 0.026    | 1431591_s_at | predicted gene 9706 /// ISG15 ubiquitin-like modifier                                                            |
| Oasl1      | 4.452 | 21.88696 | 0.0119   | 1424339_at   | 2'-5' oligoadenylate synthetase-like 1                                                                           |
| Rsad2      | 4.514 | 22.84806 | 0.0493   | 1436058_at   | radical S-adenosyl methionine domain containing 2                                                                |
| Oasl1a     | 4.531 | 23.11889 | 0.0368   | 1424775_at   | 2'-5' oligoadenylate synthetase 1A                                                                               |
| Rtp4       | 4.648 | 25.07191 | 0.0413   | 1418580_at   | receptor transporter protein 4                                                                                   |
| Ifit1      | 4.901 | 29.87776 | 0.0148   | 1450783_at   | interferon-induced protein with tetratricopeptide repeats 1                                                      |
| Cdkn2a     | 5.324 | 40.05749 | 0.00189  | 1450140_a_at | cyclin-dependent kinase inhibitor 2A                                                                             |
| Ifi2712a   | 5.508 | 45.50648 | 0.0289   | 1426278_at   | interferon, alpha-inducible protein 27 like 2A                                                                   |
| Usp18      | 5.762 | 54.26688 | 0.0215   | 1418191_at   | ubiquitin specific peptidase 18                                                                                  |
| Cdkn2b     | 6.321 | 79.94855 | 0.0367   | 1449152_at   | cyclin-dependent kinase inhibitor 2B (p15, inhibits CDK4)                                                        |
