# Supplementary material for: Consistent gene expression profiles in MexTAg transgenic mouse and wild type mouse asbestos-induced mesothelioma
Source: Springer Nature journal article supplement (doi:10.1186/s12885-015-1953-y), 2015-12-01
Supplement: MOESM3 [file 9745688]

| Gene ID  | Gene description                                                               | WTtu v WTn |           | hiTAgtu v WTn |           |
|----------|--------------------------------------------------------------------------------|------------|-----------|---------------|-----------|
|          |                                                                                | logFC      | adj_p_val | logFC         | adj_p_val |
| Acs13    | acyl-CoA synthetase long-chain family member 3                                 | 3.186      | 0.000407  | 3.022         | 0.00053   |
| Mki67    | antigen identified by monoclonal antibody Ki 67                                | 3.274      | 1.52E-05  | 3.662         | 2.72E-06  |
| Asf1b    | ASF1 anti-silencing function 1 homolog B ( <i>S. cerevisiae</i> )              | 3.111      | 0.0031    | 4.632         | 3.86E-05  |
| Aspm     | asp (abnormal spindle)-like, microcephaly associated ( <i>Drosophila</i> )     | 4.154      | 3.90E-08  | 4.895         | 3.25E-09  |
| Atad5    | ATPase family, AAA domain containing 5                                         | 3.581      | 1.68E-06  | 4.301         | 1.13E-07  |
| Aurka    | aurora kinase A                                                                | 3.117      | 0.00045   | 3.881         | 3.02E-05  |
| Aurkb    | aurora kinase B                                                                | 3.976      | 6.75E-07  | 4.58          | 8.13E-08  |
| Birc5    | baculoviral IAP repeat-containing 5                                            | 3.678      | 4.13E-06  | 3.624         | 3.28E-06  |
| Blm      | Bloom syndrome, RecQ helicase-like                                             | 3.118      | 0.000232  | 4.102         | 7.35E-06  |
| Brca1    | breast cancer 1                                                                | 3.435      | 3.13E-06  | 4.192         | 1.71E-07  |
| Bub1     | budding uninhibited by benzimidazoles 1 homolog ( <i>S. cerevisiae</i> )       | 3.686      | 2.21E-06  | 4.481         | 1.28E-07  |
| Bub1b    | budding uninhibited by benzimidazoles 1 homolog, beta ( <i>S. cerevisiae</i> ) | 3.856      | 3.73E-07  | 4.399         | 5.31E-08  |
| BC055324 | cDNA sequence BC055324                                                         | 3.65       | 1.38E-05  | 4.971         | 2.10E-07  |
| Cdc25c   | cell division cycle 25C                                                        | 4.198      | 8.48E-08  | 3.893         | 9.06E-06  |
| Cdc45    | cell division cycle 45                                                         | 3.808      | 4.99E-06  | 5.119         | 8.02E-08  |
| Cdc6     | cell division cycle 6                                                          | 4.181      | 2.59E-06  | 5.031         | 1.71E-07  |
| Cdca2    | cell division cycle associated 2                                               | 4.28       | 0.000223  | 4.48          | 9.92E-05  |
| Cdca3    | cell division cycle associated 3                                               | 3.556      | 5.99E-06  | 3.816         | 1.72E-06  |
| Cdca5    | cell division cycle associated 5                                               | 5.158      | 8.92E-08  | 5.128         | 7.67E-08  |
| Cdca7    | cell division cycle associated 7                                               | 4.073      | 6.19E-05  | 5.249         | 2.10E-06  |
| Cdca7l   | cell division cycle associated 7 like                                          | 3.421      | 8.18E-06  | 3.877         | 1.23E-06  |
| Cdca8    | cell division cycle associated 8                                               | 3.23       | 0.00028   | 4.034         | 1.68E-05  |
| Cenpa    | centromere protein A                                                           | 3.084      | 0.000168  | 3.686         | 1.61E-05  |
| Cenpe    | centromere protein E                                                           | 3.378      | 0.000106  | 4.118         | 7.70E-06  |
| Cenpf    | centromere protein F                                                           | 4.341      | 5.34E-06  | 5.158         | 4.17E-07  |
| Cenph    | centromere protein H                                                           | 3.156      | 5.56E-06  | 3.798         | 3.75E-07  |
| Cenpi    | centromere protein I                                                           | 4.038      | 0.000274  | 5.511         | 5.83E-06  |
| Cenpl    | centromere protein L                                                           | 3.075      | 4.62E-05  | 3.303         | 1.40E-05  |
| Cenpm    | centromere protein M                                                           | 3.374      | 0.0005    | 3.607         | 0.000189  |
| Cenpn    | centromere protein N                                                           | 3.866      | 5.49E-06  | 4.655         | 3.64E-07  |
| Cenpp    | centromere protein P                                                           | 3.947      | 3.73E-07  | 4.444         | 6.12E-08  |
| Cenpw    | centromere protein W                                                           | 3.09       | 0.00724   | 3.937         | 0.000652  |
| Cep55    | centrosomal protein 55                                                         | 3.77       | 4.31E-07  | 4.434         | 4.11E-08  |
| Chek1    | checkpoint kinase 1                                                            | 3.508      | 0.000195  | 4.475         | 8.83E-06  |
| Cdt1     | chromatin licensing and DNA replication factor 1                               | 3.219      | 4.62E-05  | 4.085         | 1.84E-06  |
| Cit      | citron                                                                         | 3.108      | 0.000324  | 4.214         | 7.50E-06  |
| Clspn    | claspin homolog ( <i>Xenopus laevis</i> )                                      | 4.293      | 8.26E-06  | 4.736         | 1.71E-06  |
| Chtf18   | CTF18, chromosome transmission fidelity factor 18                              | 3.265      | 7.56E-05  | 4.647         | 7.69E-07  |

|             |                                                                              |       |          |       |          |
|-------------|------------------------------------------------------------------------------|-------|----------|-------|----------|
| Ccna2       | cyclin A2                                                                    | 3.816 | 2.63E-06 | 4.674 | 1.39E-07 |
| Gm5593      | cyclin B1 /// predicted gene 5593                                            | 3.363 | 5.05E-06 | 4.224 | 1.98E-07 |
| Ccnb2       | cyclin B2                                                                    | 3.141 | 2.99E-05 | 3.504 | 5.78E-06 |
| Ccne2       | cyclin E2                                                                    | 3.049 | 7.55E-06 | 3.886 | 2.50E-07 |
| Ccnf        | cyclin F                                                                     | 3.535 | 0.000909 | 4.189 | 0.000118 |
| Dscc1       | defective in sister chromatid cohesion 1 homolog (S. cerevisiae)             | 4.579 | 2.56E-06 | 5.846 | 7.83E-08 |
| Dtl         | denticleless homolog (Drosophila)                                            | 3.414 | 7.69E-05 | 4.591 | 1.59E-06 |
| Dnmt1       | DNA methyltransferase (cytosine-5) 1                                         | 3.667 | 2.02E-05 | 4.45  | 1.34E-06 |
| Prim1       | DNA primase, p49 subunit                                                     | 3.678 | 1.45E-07 | 4.644 | 4.97E-09 |
| D17H6S56E-5 | DNA segment, Chr 17, human D6S56E 5                                          | 3.173 | 0.000555 | 3.874 | 4.75E-05 |
| D2Erd750e   | DNA segment, Chr 2, ERATO Doi 750, expressed                                 | 3.295 | 8.26E-06 | 3.952 | 6.10E-07 |
| E2f7        | E2F transcription factor 7                                                   | 4.257 | 9.90E-06 | 5.298 | 4.53E-07 |
| E2f8        | E2F transcription factor 8                                                   | 3.278 | 0.000432 | 4.665 | 5.96E-06 |
| Eme1        | essential meiotic endonuclease 1 homolog 1 (S. pombe)                        | 3.056 | 0.00815  | 3.472 | 0.00218  |
| Esco2       | establishment of cohesion 1 homolog 2 (S. cerevisiae)                        | 4.139 | 7.62E-05 | 4.695 | 1.25E-05 |
| Ercc6l      | excision repair cross-complementing rodent repair deficiency complementat    | 3.258 | 0.000348 | 4.287 | 1.16E-05 |
| Exo1        | exonuclease 1                                                                | 4.183 | 1.23E-05 | 4.785 | 1.64E-06 |
| Esp1        | extra spindle poles-like 1 (S. cerevisiae)                                   | 3.012 | 0.000939 | 4.024 | 3.16E-05 |
| Fam54a      | family with sequence similarity 54, member A                                 | 3.041 | 0.001    | 3.916 | 5.23E-05 |
| Fam64a      | family with sequence similarity 64, member A                                 | 4.488 | 6.49E-07 | 4.093 | 1.51E-06 |
| Fanca       | Fanconi anemia, complementation group A                                      | 3.037 | 6.29E-05 | 4.002 | 1.62E-06 |
| Fbxo5       | F-box protein 5                                                              | 3.555 | 5.49E-06 | 3.707 | 2.25E-06 |
| Fignl1      | fidgetin-like 1                                                              | 3.266 | 8.04E-06 | 4.248 | 2.11E-07 |
| Foxm1       | forkhead box M1                                                              | 4.26  | 1.54E-05 | 5.767 | 2.50E-07 |
| Gcat        | galanin receptor 3 /// glycine C-acetyltransferase (2-amino-3-ketobutyrate-c | 4.272 | 0.00166  | 3.652 | 0.00496  |
| Gsg2        | germ cell-specific gene 2                                                    | 3.822 | 0.000264 | 4.901 | 1.16E-05 |
| Gins1       | GIN5 complex subunit 1 (Psf1 homolog)                                        | 3.55  | 0.00012  | 4.179 | 1.34E-05 |
| Glpr1       | GLI pathogenesis-related 1 (glioma)                                          | 6.474 | 4.81E-08 | 5.301 | 5.04E-07 |
| Gatm        | glycine amidinotransferase (L-arginine:glycine amidinotransferase)           | 3.771 | 0.0182   | 4.914 | 0.00174  |
| Gas2l3      | growth arrest-specific 2 like 3                                              | 4.798 | 8.48E-08 | 5.405 | 1.38E-08 |
| Hells       | helicase, lymphoid specific                                                  | 4.127 | 4.52E-07 | 5.097 | 2.33E-08 |
| Hmmr        | hyaluronan mediated motility receptor (RHAMM)                                | 3.135 | 2.85E-05 | 3.62  | 3.54E-06 |
| Incenp      | inner centromere protein                                                     | 3.224 | 1.20E-07 | 3.395 | 4.99E-08 |
| Iqgap3      | IQ motif containing GTPase activating protein 3                              | 3.033 | 1.34E-05 | 4.224 | 1.55E-07 |
| Kif11       | kinesin family member 11                                                     | 4.867 | 6.74E-08 | 5.445 | 1.20E-08 |
| Kif18b      | kinesin family member 18B                                                    | 4.056 | 2.10E-06 | 4.843 | 1.54E-07 |
| Kif20a      | kinesin family member 20A                                                    | 3.382 | 9.09E-08 | 3.835 | 1.38E-08 |
| Kif20b      | kinesin family member 20B                                                    | 3.762 | 4.38E-07 | 4.37  | 4.98E-08 |
| Kif23       | kinesin family member 23                                                     | 5.403 | 2.40E-07 | 6.012 | 4.90E-08 |
| Kif2c       | kinesin family member 2C                                                     | 3.918 | 5.96E-06 | 4.319 | 1.25E-06 |

|               |                                                                                         |       |          |       |          |
|---------------|-----------------------------------------------------------------------------------------|-------|----------|-------|----------|
| Kif4          | kinesin family member 4                                                                 | 4.035 | 9.86E-05 | 5.204 | 3.54E-06 |
| Kntc1         | kinetochore associated 1                                                                | 3.163 | 8.98E-07 | 4.182 | 1.83E-08 |
| Ltbp1         | latent transforming growth factor beta binding protein 1                                | 4.963 | 0.00499  | 3.336 | 0.0444   |
| Lrr1          | leucine rich repeat protein 1                                                           | 4.09  | 0.000786 | 5.333 | 3.36E-05 |
| Melk          | maternal embryonic leucine zipper kinase                                                | 3.496 | 5.14E-05 | 4.321 | 2.94E-06 |
| Mastl         | microtubule associated serine/threonine kinase-like                                     | 3.789 | 1.49E-05 | 4.792 | 5.73E-07 |
| Mcm10         | minichromosome maintenance deficient 10 ( <i>S. cerevisiae</i> )                        | 4.174 | 5.88E-05 | 5.284 | 2.50E-06 |
| Mcm3          | minichromosome maintenance deficient 3 ( <i>S. cerevisiae</i> )                         | 3.628 | 0.000155 | 5.447 | 9.09E-07 |
| Mcm5          | minichromosome maintenance deficient 5, cell division cycle 46 ( <i>S. cerevisiae</i> ) | 3.307 | 5.32E-06 | 4.094 | 2.49E-07 |
| Mis18bp1      | MIS18 binding protein 1                                                                 | 3.291 | 3.91E-05 | 3.505 | 4.22E-07 |
| Mybl2         | myeloblastosis oncogene-like 2                                                          | 3.42  | 0.00395  | 5.001 | 6.70E-05 |
| Mlf1ip        | myeloid leukemia factor 1 interacting protein                                           | 3.251 | 0.000107 | 3.819 | 1.21E-05 |
| Ndc80         | NDC80 homolog, kinetochore complex component ( <i>S. cerevisiae</i> )                   | 3.345 | 4.67E-06 | 4.1   | 2.44E-07 |
| Nrp1          | neuropilin 1                                                                            | 4.019 | 0.00103  | 3.207 | 0.00572  |
| Nek2          | NIMA (never in mitosis gene a)-related expressed kinase 2                               | 3.36  | 7.56E-05 | 4.373 | 2.35E-06 |
| Ncapd2        | non-SMC condensin I complex, subunit D2                                                 | 3.444 | 4.33E-06 | 3.956 | 5.04E-07 |
| Ncapg         | non-SMC condensin I complex, subunit G                                                  | 3.858 | 3.14E-06 | 4.618 | 2.21E-07 |
| Ncaph         | non-SMC condensin I complex, subunit H                                                  | 3.005 | 2.76E-05 | 3.565 | 4.37E-07 |
| Nusap1        | nucleolar and spindle associated protein 1                                              | 3.128 | 8.67E-06 | 4.247 | 1.36E-07 |
| Nup43         | nucleoporin 43                                                                          | 3.233 | 2.48E-05 | 3.315 | 1.30E-05 |
| Nuf2          | NUF2, NDC80 kinetochore complex component, homolog ( <i>S. cerevisiae</i> )             | 3.882 | 7.10E-06 | 4.354 | 1.20E-06 |
| Pbk           | PDZ binding kinase                                                                      | 3.479 | 0.000389 | 3.964 | 6.98E-05 |
| Pde4d         | phosphodiesterase 4D, cAMP specific                                                     | 3.173 | 0.0314   | 3.533 | 0.0122   |
| Plk1          | polo-like kinase 1                                                                      | 3.362 | 0.000117 | 3.649 | 3.36E-05 |
| Pola1         | polymerase (DNA directed), alpha 1                                                      | 3.538 | 0.000259 | 5.035 | 3.23E-06 |
| Pole          | polymerase (DNA directed), epsilon                                                      | 3.126 | 4.06E-05 | 4.06  | 1.23E-06 |
| Racgap1       | Rac GTPase-activating protein 1                                                         | 3.637 | 1.03E-05 | 4.484 | 5.33E-07 |
| Rad51ap1      | RAD51 associated protein 1                                                              | 4.213 | 1.17E-07 | 5.285 | 4.22E-09 |
| Rad54b        | RAD54 homolog B ( <i>S. cerevisiae</i> )                                                | 3.531 | 0.000106 | 5.152 | 8.43E-07 |
| Rad54l        | RAD54 like ( <i>S. cerevisiae</i> )                                                     | 3.613 | 0.00119  | 4.193 | 0.000204 |
| Rfc5          | replication factor C (activator 1) 5                                                    | 3.052 | 5.59E-06 | 3.795 | 2.50E-07 |
| 1110012J17Rik | RIKEN cDNA 1110012J17 gene                                                              | 3.553 | 0.0157   | 5.213 | 0.000457 |
| 1200009I06Rik | RIKEN cDNA 1200009I06 gene                                                              | 3.758 | 0.0112   | 3.257 | 0.0223   |
| 2700038G22Rik | RIKEN cDNA 2700038G22 gene                                                              | 3.875 | 0.00101  | 4.155 | 0.000395 |
| 4930534B04Rik | RIKEN cDNA 4930534B04 gene                                                              | 3.083 | 0.0363   | 4.232 | 0.00298  |
| Pebp1         | RIKEN cDNA 4933413G19 gene /// forkhead box M1 /// phosphatidylethano                   | 4.092 | 3.17E-06 | 5.401 | 6.28E-08 |
| 5730590G19Rik | RIKEN cDNA 5730590G19 gene                                                              | 3.076 | 0.000962 | 3.858 | 6.76E-05 |
| A130088B03Rik | RIKEN cDNA A130088B03 gene                                                              | 3.265 | 0.000654 | 3.447 | 0.000295 |
| C330027C09Rik | RIKEN cDNA C330027C09 gene                                                              | 3.267 | 3.45E-05 | 4.359 | 7.34E-07 |
| E130306D19Rik | RIKEN cDNA E130306D19 gene                                                              | 3.078 | 0.00196  | 4.408 | 3.43E-05 |

|               |                                                                     |       |          |       |          |
|---------------|---------------------------------------------------------------------|-------|----------|-------|----------|
| F630043A04Rik | RIKEN cDNA F630043A04 gene                                          | 3.167 | 0.000228 | 3.812 | 2.05E-05 |
| Sep6          | septin 6                                                            | 3.606 | 0.0019   | 3.97  | 0.000586 |
| Shcbp1        | Shc SH2-domain binding protein 1                                    | 3.4   | 3.05E-05 | 4.015 | 2.95E-06 |
| Sgol1         | shugoshin-like 1 (S. pombe)                                         | 4.424 | 1.73E-06 | 5.875 | 3.18E-08 |
| Sgol2         | shugoshin-like 2 (S. pombe)                                         | 3.523 | 3.95E-08 | 4.161 | 3.25E-09 |
| Slc29a1       | solute carrier family 29 (nucleoside transporters), member 1        | 3.571 | 0.000957 | 4.991 | 1.91E-05 |
| Spc24         | SPC24, NDC80 kinetochore complex component, homolog (S. cerevisiae) | 3.461 | 0.0004   | 3.977 | 6.61E-05 |
| Spag5         | sperm associated antigen 5                                          | 4.387 | 4.14E-08 | 4.797 | 1.06E-08 |
| Ska1          | spindle and kinetochore associated complex subunit 1                | 4.333 | 4.07E-08 | 5.54  | 9.89E-10 |
| Sass6         | spindle assembly 6 homolog (C. elegans)                             | 3.251 | 0.000505 | 4.301 | 1.68E-05 |
| Suv39h1       | suppressor of variegation 3-9 homolog 1 (Drosophila)                | 3.334 | 0.00441  | 4.457 | 0.000212 |
| Suv39h2       | suppressor of variegation 3-9 homolog 2 (Drosophila)                | 3.237 | 0.0106   | 4.483 | 0.000472 |
| Tiam2         | T cell lymphoma invasion and metastasis 2                           | 3.823 | 0.000342 | 3.714 | 0.000351 |
| Tk1           | thymidine kinase 1                                                  | 4.323 | 4.65E-05 | 4.201 | 4.57E-05 |
| Timeless      | timeless homolog (Drosophila)                                       | 3.784 | 1.76E-05 | 5.041 | 3.49E-07 |
| Top2a         | topoisomerase (DNA) II alpha                                        | 5.786 | 2.51E-09 | 5.15  | 1.31E-08 |
| Tpx2          | TPX2, microtubule-associated protein homolog (Xenopus laevis)       | 4.127 | 4.37E-07 | 4.826 | 4.54E-08 |
| Tacc3         | transforming, acidic coiled-coil containing protein 3               | 3.651 | 2.43E-06 | 4.027 | 4.74E-07 |
| Troap         | trophinin associated protein                                        | 3.49  | 0.00712  | 4.489 | 0.000577 |
| Ttk           | Ttk protein kinase                                                  | 4.461 | 6.49E-07 | 5.071 | 9.24E-08 |
| Ube2t         | ubiquitin-conjugating enzyme E2T (putative)                         | 3.088 | 5.78E-06 | 4.031 | 1.44E-07 |
| Uhrf1         | ubiquitin-like, containing PHD and RING finger domains, 1           | 4.272 | 1.43E-07 | 5.072 | 1.19E-08 |
| Ung           | uracil DNA glycosylase                                              | 3.439 | 0.0395   | 4.929 | 0.0027   |
| Wdhd1         | WD repeat and HMG-box DNA binding protein 1                         | 3.502 | 0.000163 | 4.529 | 6.18E-06 |
| Zwilch        | Zwilch, kinetochore associated, homolog (Drosophila)                | 3.161 | 1.09E-05 | 3.267 | 5.19E-06 |
