# Supplementary material for: Consistent gene expression profiles in MexTAg transgenic mouse and wild type mouse asbestos-induced mesothelioma
Source: Springer Nature journal article supplement (doi:10.1186/s12885-015-1953-y), 2015-12-01
Supplement: MOESM4 [file 9745688]

| Gene        | logFC  | adj_p_val | probeID     | genedesc                                                                                                  |
|-------------|--------|-----------|-------------|-----------------------------------------------------------------------------------------------------------|
| MS12        | 2.869  | 1.50E-06  | 243010_at   | musashi homolog 2 (Drosophila)                                                                            |
| MAGOHB      | 1.055  | 3.78E-06  | 218894_s_at | mago-nashi homolog B (Drosophila)                                                                         |
| ARHGAP6     | -3.257 | 1.07E-05  | 206167_s_at | Rho GTPase activating protein 6                                                                           |
| DENN2C      | -2.117 | 3.29E-05  | 230769_at   | DENN/MADD domain containing 2C                                                                            |
| TSPAN8      | -5.49  | 0.00119   | 203824_at   | tetraspanin 8                                                                                             |
| PTGS2       | -5.064 | 0.00119   | 204748_at   | prostaglandin-endoperoxide synthase 2 (prostaglandin G/H synthase and cyclooxygenase)                     |
| EGR2        | -4.176 | 0.00119   | 205249_at   | early growth response 2                                                                                   |
| PKIG        | -1.593 | 0.00119   | 202732_at   | protein kinase (cAMP-dependent, catalytic) inhibitor gamma                                                |
| C4orf3      | -1.221 | 0.00119   | 224604_at   | chromosome 4 open reading frame 3                                                                         |
| CCT7        | 0.962  | 0.00119   | 200812_at   | chaperonin containing TCP1, subunit 7 (eta)                                                               |
| RUVBL1      | 1.51   | 0.00119   | 201614_s_at | RuvB-like 1 (E. coli)                                                                                     |
| SSR1        | 2.284  | 0.00119   | 200890_s_at | signal sequence receptor, alpha                                                                           |
| SLC4A11     | 3.677  | 0.00119   | 223748_at   | solute carrier family 4, sodium borate transporter, member 11                                             |
| DGKE        | -2.656 | 0.00153   | 238694_at   | diacylglycerol kinase, epsilon 64kDa                                                                      |
| PGM5        | -3.057 | 0.00154   | 226303_at   | phosphoglucomutase 5                                                                                      |
| DLG1        | 0.713  | 0.00154   | 202515_at   | discs, large homolog 1 (Drosophila)                                                                       |
| DDX41       | 0.728  | 0.00154   | 217840_at   | DEAD (Asp-Glu-Ala-Asp) box polypeptide 41                                                                 |
| CDC123      | 0.99   | 0.00154   | 201725_at   | cell division cycle 123 homolog (S. cerevisiae)                                                           |
| C20orf112   | 1.958  | 0.00154   | 230954_at   | chromosome 20 open reading frame 112                                                                      |
| LOC10050588 | 2.535  | 0.00154   | 240382_at   | uncharacterized LOC100505880                                                                              |
| C20orf160   | -2.81  | 0.00155   | 231991_at   | chromosome 20 open reading frame 160                                                                      |
| FANCD2      | 2.415  | 0.00166   | 242560_at   | Fanconi anemia, complementation group D2                                                                  |
| PPF1A1      | 1.521  | 0.0017    | 210236_at   | protein tyrosine phosphatase, receptor type, f polypeptide (PTPRF), interacting protein (liprin), alpha 1 |
| SETDB2      | -0.773 | 0.00172   | 235339_at   | SET domain, bifurcated 2                                                                                  |
| CALR        | 1.033  | 0.00172   | 200935_at   | calreticulin                                                                                              |
| ADAMTS1     | -3.47  | 0.00176   | 222162_s_at | ADAM metalloproteinase with thrombospondin type 1 motif, 1                                                |
| USP53       | -1.099 | 0.00177   | 231817_at   | ubiquitin specific peptidase 53                                                                           |
| ANKRD29     | -3.497 | 0.00179   | 238332_at   | ankyrin repeat domain 29                                                                                  |
| SOCS2       | -2.628 | 0.00179   | 203373_at   | suppressor of cytokine signaling 2                                                                        |
| GIPC2       | -2.577 | 0.00179   | 236548_at   | GIPC PDZ domain containing family, member 2                                                               |
| C10orf128   | -2.508 | 0.00179   | 228372_at   | chromosome 10 open reading frame 128                                                                      |
| MTF         | -2.016 | 0.00179   | 226066_at   | microphthalmia-associated transcription factor                                                            |
| CYB5R3      | -1.092 | 0.00179   | 201885_s_at | cytochrome b5 reductase 3                                                                                 |
| INPP4A      | -0.815 | 0.00179   | 227087_at   | inositol polyphosphate-4-phosphatase, type 1, 107kDa                                                      |
| TROVE2      | 0.467  | 0.00179   | 210438_x_at | TROVE domain family, member 2                                                                             |
| CEP41       | 0.744  | 0.00179   | 225484_at   | centrosomal protein 41kDa                                                                                 |
| EIF4G3      | 0.764  | 0.00179   | 201936_s_at | eukaryotic translation initiation factor 4 gamma, 3                                                       |
| VGLL4       | 0.775  | 0.00179   | 212399_s_at | vestigial like 4 (Drosophila)                                                                             |
| SLC30A5     | 0.879  | 0.00179   | 218989_x_at | solute carrier family 30 (zinc transporter), member 5                                                     |
| COP21       | 0.976  | 0.00179   | 217726_at   | coatamer protein complex, subunit zeta 1                                                                  |
| COX20       | 1.082  | 0.00179   | 224824_at   | COX20 Cox2 chaperone homolog (S. cerevisiae)                                                              |
| LONP2       | 1.108  | 0.00179   | 223098_s_at | lon peptidase 2, peroxisomal                                                                              |
| RPE         | 1.18   | 0.00179   | 221770_at   | rcRPE /// ribulose-5-phosphate-3-epimerase                                                                |
| PPP1R14B    | 1.365  | 0.00179   | 212680_x_at | protein phosphatase 1, regulatory (inhibitor) subunit 14B                                                 |
| STT3A       | 1.438  | 0.00179   | 202223_at   | STT3, subunit of the oligosaccharyltransferase complex, homolog A (S. cerevisiae)                         |
| SPTLC2      | 1.623  | 0.00179   | 203128_at   | serine palmitoyltransferase, long chain base subunit 2                                                    |
| ALDH18A1    | 1.856  | 0.00179   | 217791_s_at | aldehyde dehydrogenase 18 family, member A1                                                               |
| P4HA1       | 1.998  | 0.00179   | 207543_s_at | prolyl 4-hydroxylase, alpha polypeptide I                                                                 |
| TMOD3       | 2.477  | 0.00179   | 223078_s_at | tropomodulin 3 (ubiquitous)                                                                               |
| CALCRL      | -3.233 | 0.00183   | 234996_at   | calcitonin receptor-like                                                                                  |
| STARD9      | -2.849 | 0.00183   | 227108_at   | StAR-related lipid transfer (START) domain containing 9                                                   |
| EMCN        | -2.696 | 0.00183   | 222885_at   | endomucin                                                                                                 |
| SPARCL1     | -1.87  | 0.00183   | 200795_at   | SPARC-like 1 (hevin)                                                                                      |
| SIPA1L2     | -1.754 | 0.00183   | 233587_s_at | signal-induced proliferation-associated 1 like 2                                                          |
| TACC1       | -1.446 | 0.00183   | 200911_s_at | transforming, acidic coiled-coil containing protein 1                                                     |
| ASB13       | -1.042 | 0.00183   | 218862_at   | ankyrin repeat and SOCS box containing 13                                                                 |
| SKAP2       | -0.917 | 0.00183   | 225639_at   | src kinase associated phosphoprotein 2                                                                    |
| SETD4       | 0.732  | 0.00183   | 213989_x_at | SET domain containing 4                                                                                   |
| NME2        | 1.125  | 0.00183   | 201268_at   | NME1-NME2 readthrough /// NME/NM23 nucleoside diphosphate kinase 2                                        |
| TSPAN2      | -3.12  | 0.00185   | 227236_at   | tetraspanin 2                                                                                             |
| CSRP2       | -2.572 | 0.00193   | 207030_s_at | cysteine and glycine-rich protein 2                                                                       |
| ARHGAP24    | -2.114 | 0.00193   | 223422_s_at | Rho GTPase activating protein 24                                                                          |
| STOM        | -1.737 | 0.00193   | 201061_s_at | stomatin                                                                                                  |
| HECA        | -1.143 | 0.00193   | 218603_at   | headcase homolog (Drosophila)                                                                             |
| RILPL2      | -1.021 | 0.00193   | 227983_at   | Rab interacting lysosomal protein-like 2                                                                  |
| KLHL8       | -0.972 | 0.00193   | 242648_at   | kelch-like 8 (Drosophila)                                                                                 |
| NUFIP2      | 0.747  | 0.00193   | 224939_at   | nuclear fragile X mental retardation protein interacting protein 2                                        |
| NAA50       | 1.031  | 0.00193   | 222393_s_at | N(alpha)-acetyltransferase 50, NatE catalytic subunit                                                     |
| STAM        | 1.1    | 0.00193   | 203544_s_at | signal transducing adaptor molecule (SH3 domain and ITAM motif) 1                                         |
| PTS         | 1.525  | 0.00202   | 209694_at   | 6-pyruvoyltetrahydropterin synthase                                                                       |
| STAG3L4     | 1.877  | 0.00202   | 222801_s_at | stromal antigen 3-like 4                                                                                  |
| LOC10065313 | -3.826 | 0.00202   | 227404_s_at | uncharacterized LOC100653132                                                                              |
| HDAC9       | -1.985 | 0.00206   | 205659_at   | histone deacetylase 9                                                                                     |
| GNG7        | -0.974 | 0.00206   | 228831_s_at | guanine nucleotide binding protein (G protein), gamma 7                                                   |

|             |        |         |              |                                                                                                                                                                |
|-------------|--------|---------|--------------|----------------------------------------------------------------------------------------------------------------------------------------------------------------|
| REV3L       | -0.864 | 0.00206 | 208070_s_at  | REV3-like, polymerase (DNA directed), zeta, catalytic subunit                                                                                                  |
| CANX        | 1.271  | 0.00206 | 208852_s_at  | calnexin                                                                                                                                                       |
| ANTXR1      | 2.503  | 0.00206 | 220092_s_at  | anthrax toxin receptor 1                                                                                                                                       |
| LOC10065334 | 0.938  | 0.0021  | 214737_x_at  | heterogeneous nuclear ribonucleoprotein C (C1/C2) /// uncharacterized LOC100652761 /// uncharacterized LOC100653343                                            |
| PDIA6       | 0.815  | 0.00211 | 208638_at    | protein disulfide isomerase family A, member 6                                                                                                                 |
| MAOA        | -4.644 | 0.00211 | 212741_at    | monoamine oxidase A                                                                                                                                            |
| RGH         | -2.703 | 0.00211 | 210751_s_at  | regucalcin (senescence marker protein-30)                                                                                                                      |
| Mar-02      | -2.294 | 0.00211 | 221636_s_at  | mitochondrial amidoxime reducing component 2                                                                                                                   |
| DIP2A       | 1.123  | 0.00211 | 1555301_a_at | DIP2 disco-interacting protein 2 homolog A (Drosophila)                                                                                                        |
| CIAPIN1     | 1.144  | 0.00211 | 208424_s_at  | cytokine induced apoptosis inhibitor 1                                                                                                                         |
| EIF5        | 1.257  | 0.00211 | 208708_x_at  | eukaryotic translation initiation factor 5                                                                                                                     |
| PDIA4       | 1.9    | 0.00211 | 208658_at    | protein disulfide isomerase family A, member 4                                                                                                                 |
| SHC3        | -3.106 | 0.00212 | 229824_at    | SHC (Src homology 2 domain containing) transforming protein 3                                                                                                  |
| FILIP1      | -2.592 | 0.00212 | 1570515_a_at | filamin A interacting protein 1                                                                                                                                |
| DDX18       | 0.992  | 0.00212 | 208897_s_at  | DEAD (Asp-Glu-Ala-Asp) box polypeptide 18                                                                                                                      |
| SNRPG       | 1.064  | 0.00212 | 205644_s_at  | small nuclear ribonucleoprotein polypeptide G                                                                                                                  |
| TMX2        | 1.086  | 0.00212 | 201175_at    | thioredoxin-related transmembrane protein 2                                                                                                                    |
| SNURF       | 1.274  | 0.00212 | 206042_x_at  | paternally expressed transcript PAR-SN /// small nucleolar RNA, C/D box 107 /// small nuclear ribonucleoprotein polypeptide N /// SNRPN upstream reading frame |
| AP1G1       | 1.002  | 0.00212 | 203350_at    | adaptor-related protein complex 1, gamma 1 subunit                                                                                                             |
| TMPO1       | 1.079  | 0.00212 | 225765_at    | transportin 1                                                                                                                                                  |
| FBXO22      | 1.538  | 0.00212 | 225734_at    | F-box protein 22                                                                                                                                               |
| NUP54       | -0.555 | 0.00212 | 218256_s_at  | nucleoporin 54kDa                                                                                                                                              |
| STYX11      | 1.246  | 0.00214 | 232353_s_at  | serine/threonine/tyrosine interacting-like 1                                                                                                                   |
| NRSA2       | -3.719 | 0.00215 | 210174_at    | nuclear receptor subfamily 5, group A, member 2                                                                                                                |
| RUNX1T1     | -2.199 | 0.0022  | 228827_at    | runt-related transcription factor 1; translocated to, 1 (cyclin D-related)                                                                                     |
| UBFD1       | 1.766  | 0.00231 | 205687_at    | ubiquitin family domain containing 1                                                                                                                           |
| BCCIP       | 1.731  | 0.00235 | 227896_at    | BRCA2 and CDKN1A interacting protein                                                                                                                           |
| EGR3        | -5.281 | 0.00239 | 206115_at    | early growth response 3                                                                                                                                        |
| RASL12      | -2.426 | 0.00239 | 219167_at    | RAS-like, family 12                                                                                                                                            |
| PRELID1     | 1.36   | 0.00255 | 224232_s_at  | PREL1 domain containing 1                                                                                                                                      |
| LOC643733   | -1.996 | 0.00261 | 240890_at    | caspase 4, apoptosis-related cysteine peptidase pseudogene                                                                                                     |
| RUNDC3B     | -3.427 | 0.00261 | 241703_at    | RUN domain containing 3B                                                                                                                                       |
| ANXA4       | 1.425  | 0.00261 | 201301_s_at  | annexin A4                                                                                                                                                     |
| LAMA1       | 3.08   | 0.00261 | 227048_at    | laminin, alpha 1                                                                                                                                               |
| CDH4        | 3.855  | 0.00265 | 206866_at    | cadherin 4, type 1, R-cadherin (retinal)                                                                                                                       |
| UBE2H       | 0.913  | 0.00269 | 222420_s_at  | ubiquitin-conjugating enzyme E2H                                                                                                                               |
| GALNT10     | 1.845  | 0.00291 | 212256_at    | UDP-N-acetyl-alpha-D-galactosamine:polypeptide N-acetylgalactosaminyltransferase 10 (GalNAc-T10)                                                               |
| SUMF2       | 0.511  | 0.00292 | 225002_s_at  | sulfatase modifying factor 2                                                                                                                                   |
| B4GALT4     | 1.695  | 0.00293 | 212876_at    | UDP-Gal:betaGlcNAc beta 1,4- galactosyltransferase, polypeptide 4                                                                                              |
| GART        | 0.891  | 0.00299 | 212378_at    | phosphoribosylglycinamide formyltransferase, phosphoribosylglycinamide synthetase, phosphoribosylaminoimidazole synthetase                                     |
| PAWR        | 1.831  | 0.00299 | 204004_at    | PRKC, apoptosis, WT1, regulator                                                                                                                                |
| KANK3       | -2.343 | 0.00301 | 213715_s_at  | KN motif and ankyrin repeat domains 3                                                                                                                          |
| MANF        | 1.206  | 0.00301 | 202655_at    | mesencephalic astrocyte-derived neurotrophic factor                                                                                                            |
| MPDZ        | -1.673 | 0.0031  | 205079_s_at  | multiple PDZ domain protein                                                                                                                                    |
| FGD6        | 2.087  | 0.0031  | 1555137_a_at | FYVE, RhoGEF and PH domain containing 6                                                                                                                        |
| SND1-IT1    | 0.987  | 0.00311 | 210109_at    | SND1 intronic transcript 1 (non-protein coding)                                                                                                                |
| COQ7        | 1.048  | 0.00315 | 210820_x_at  | coenzyme Q7 homolog, ubiquinone (yeast)                                                                                                                        |
| PSMD2       | 0.783  | 0.00318 | 200830_at    | proteasome (prosome, macropain) 26S subunit, non-ATPase, 2                                                                                                     |
| MAGED1      | 0.934  | 0.00319 | 209014_at    | melanoma antigen family D, 1                                                                                                                                   |
| PREX2       | -2.748 | 0.00323 | 228692_at    | phosphatidylinositol-3,4,5-trisphosphate-dependent Rac exchange factor 2                                                                                       |
| EGR1        | -3.219 | 0.00324 | 201694_s_at  | early growth response 1                                                                                                                                        |
| TFEB        | -0.977 | 0.00324 | 50221_at     | transcription factor EB                                                                                                                                        |
| ATP5SL      | -0.542 | 0.00324 | 45828_at     | ATP5S-like                                                                                                                                                     |
| PSMD1       | 0.962  | 0.00324 | 201198_s_at  | proteasome (prosome, macropain) 26S subunit, non-ATPase, 1                                                                                                     |
| SEC13       | 1.096  | 0.00324 | 207707_s_at  | SEC13 homolog (S. cerevisiae)                                                                                                                                  |
| TIMM23      | 1.378  | 0.00324 | 218118_s_at  | translocase of inner mitochondrial membrane 23 homolog (yeast)                                                                                                 |
| PFN2        | 1.701  | 0.00324 | 204992_s_at  | profilin 2                                                                                                                                                     |
| TAPT1       | -1.103 | 0.00332 | 227407_at    | transmembrane anterior posterior transformation 1                                                                                                              |
| NPEPPS      | 0.75   | 0.00332 | 201454_s_at  | uncharacterized LOC100653042 /// aminopeptidase puromycin sensitive                                                                                            |
| PNPT1       | 1.15   | 0.00332 | 225291_at    | polyribonucleotide nucleotidyltransferase 1                                                                                                                    |
| MTDH        | 0.952  | 0.00336 | 212250_at    | metadherin                                                                                                                                                     |
| GTF2E1      | 0.718  | 0.00337 | 205930_at    | general transcription factor IIE, polypeptide 1, alpha 56kDa                                                                                                   |
| FAM162B     | -3.161 | 0.00341 | 228875_at    | family with sequence similarity 162, member B                                                                                                                  |
| CYR1        | -2.178 | 0.00341 | 228665_at    | cysteine/tyrosine-rich 1                                                                                                                                       |
| MID2        | -1.397 | 0.00341 | 209733_at    | midline 2                                                                                                                                                      |
| RHEB        | 0.845  | 0.00341 | 201453_x_at  | Ras homolog enriched in brain                                                                                                                                  |
| CD83        | -2.199 | 0.00344 | 204440_at    | CD83 molecule                                                                                                                                                  |
| CD1C        | -2.851 | 0.00344 | 205987_at    | CD1c molecule                                                                                                                                                  |
| NUDC        | 0.955  | 0.00344 | 210574_s_at  | nuclear distribution C homolog (A. nidulans)                                                                                                                   |
| ZNF273      | 1.778  | 0.00345 | 243661_at    | zinc finger protein 273                                                                                                                                        |
| CNIH4       | 1.195  | 0.00349 | 228437_at    | cornichon homolog 4 (Drosophila)                                                                                                                               |
| PARM1       | -2.905 | 0.00365 | 225809_at    | prostate androgen-regulated mucin-like protein 1                                                                                                               |
| FAM13C      | -2.676 | 0.00365 | 1554547_at   | family with sequence similarity 13, member C                                                                                                                   |
| NF1         | 0.602  | 0.00365 | 212676_at    | neurofibromin 1                                                                                                                                                |
| CKAP2       | 1.513  | 0.00365 | 218252_at    | cytoskeleton associated protein 2                                                                                                                              |

|             |        |         |             |                                                                       |
|-------------|--------|---------|-------------|-----------------------------------------------------------------------|
| HTT         | -1.165 | 0.0037  | 202390_s_at | huntingtin                                                            |
| DYNC112     | 0.305  | 0.00375 | 211684_s_at | dynein, cytoplasmic 1, intermediate chain 2                           |
| SNX19       | 0.879  | 0.00375 | 202359_s_at | sorting nexin 19                                                      |
| RGS5        | -2.138 | 0.00378 | 218353_at   | regulator of G-protein signaling 5                                    |
| SLC25A13    | 0.9    | 0.0038  | 203775_at   | solute carrier family 25 (aspartate/glutamate carrier), member 13     |
| DCAKD       | 0.675  | 0.00386 | 224522_s_at | dephospho-CoA kinase domain containing                                |
| ADCY4       | -2.049 | 0.00387 | 230800_at   | adenylate cyclase 4                                                   |
| UGGT1       | 0.945  | 0.00391 | 222569_at   | UDP-glucose glycoprotein glucosyltransferase 1                        |
| CSorf43     | 0.81   | 0.00401 | 224740_at   | chromosome 5 open reading frame 43                                    |
| PRTFDC1     | -1.443 | 0.00407 | 222803_at   | phosphoribosyl transferase domain containing 1                        |
| RAPH1       | -1.401 | 0.00407 | 225189_s_at | Ras association (RalGDS/AF-6) and pleckstrin homology domains 1       |
| PLD1        | -1.747 | 0.00415 | 226636_at   | phospholipase D1, phosphatidylcholine-specific                        |
| MRPL3       | 1.115  | 0.00424 | 208787_at   | mitochondrial ribosomal protein L3                                    |
| PMP22       | -1.285 | 0.00425 | 210139_s_at | peripheral myelin protein 22                                          |
| TMEM209     | 1.004  | 0.00432 | 235158_at   | transmembrane protein 209                                             |
| FCER1A      | -3.059 | 0.00439 | 211734_s_at | Fc fragment of IgE, high affinity I, receptor for; alpha polypeptide  |
| ECSCR       | -2.433 | 0.00439 | 227780_s_at | endothelial cell surface expressed chemotaxis and apoptosis regulator |
| HOXA5       | -2.282 | 0.00439 | 213844_at   | homeobox A5                                                           |
| LOC10050565 | -2.155 | 0.00439 | 230381_at   | chromosome 1 open reading frame 186 /// uncharacterized LOC100505650  |
| NCALD       | -1.954 | 0.00439 | 211685_s_at | neurocalcin delta                                                     |
| AHR         | -1.833 | 0.00439 | 202820_at   | aryl hydrocarbon receptor                                             |
| ZDHHC5      | 0.737  | 0.00439 | 224858_at   | zinc finger, DHHC-type containing 5                                   |
| MIR3652     | 0.919  | 0.00439 | 200598_s_at | heat shock protein 90kDa beta (Grp94), member 1 /// microRNA 3652     |
| PSPH        | 1.426  | 0.00439 | 205194_at   | phosphoserine phosphatase                                             |
| DOCK1       | 1.857  | 0.00439 | 241708_at   | dedicator of cytokinesis 1                                            |
| DTNA        | -2.169 | 0.00439 | 227084_at   | dystrobrevin, alpha                                                   |
| CCDC99      | 1.25   | 0.00439 | 221685_s_at | coiled-coil domain containing 99                                      |
| DOCK5       | 1.652  | 0.00439 | 230263_s_at | dedicator of cytokinesis 5                                            |
| CCT5        | 1.717  | 0.00439 | 208696_at   | chaperonin containing TCP1, subunit 5 (epsilon)                       |
| F8          | -2.313 | 0.00439 | 205756_s_at | coagulation factor VIII, procoagulant component                       |
| KIAA1377    | -1.874 | 0.00439 | 235956_at   | KIAA1377                                                              |
| FANCF       | 1.125  | 0.00439 | 218689_at   | Fanconi anemia, complementation group F                               |
| KCTD4       | 2.582  | 0.00439 | 240512_x_at | potassium channel tetramerisation domain containing 4                 |
| PRKG1       | -2.339 | 0.00441 | 228396_at   | protein kinase, cGMP-dependent, type 1                                |
| TIMM17A     | 0.794  | 0.00441 | 215171_s_at | translocase of inner mitochondrial membrane 17 homolog A (yeast)      |
| FICD        | 1.542  | 0.00441 | 219910_at   | FIC domain containing                                                 |
| KITLG       | -1.786 | 0.00443 | 226534_at   | KIT ligand                                                            |
| TEAD1       | 0.877  | 0.00443 | 224955_at   | TEA domain family member 1 (SV40 transcriptional enhancer factor)     |
| TXNL4A      | 0.973  | 0.00443 | 202836_s_at | thioredoxin-like 4A                                                   |
| PARPBP      | 1.141  | 0.00443 | 220060_s_at | PARP1 binding protein                                                 |
| PPAPDC1B    | 1.536  | 0.00448 | 223569_at   | phosphatidic acid phosphatase type 2 domain containing 1B             |
| PELI2       | -3.008 | 0.00449 | 219132_at   | pellino E3 ubiquitin protein ligase family member 2                   |
| ITGA8       | -2.939 | 0.00449 | 214265_at   | integrin, alpha 8                                                     |
| LDB2        | -2.483 | 0.00449 | 206481_s_at | LIM domain binding 2                                                  |
| FNIP2       | -1.909 | 0.00449 | 225922_at   | folliculin interacting protein 2                                      |
| PECAM1      | -1.79  | 0.00449 | 208982_at   | platelet/endothelial cell adhesion molecule 1                         |
| CCT8        | 0.435  | 0.00449 | 200873_s_at | chaperonin containing TCP1, subunit 8 (theta)                         |
| YIF1A       | 1.144  | 0.00449 | 202418_at   | Yip1 interacting factor homolog A (S. cerevisiae)                     |
| EGFR        | 1.177  | 0.00449 | 201983_s_at | epidermal growth factor receptor                                      |
| SCCPDH      | 1.867  | 0.00449 | 201826_s_at | saccharopine dehydrogenase (putative)                                 |
| PDE5A       | -2.268 | 0.00451 | 227088_at   | phosphodiesterase 5A, cGMP-specific                                   |
| PLVAP       | -1.836 | 0.00451 | 221529_s_at | plasmalemma vesicle associated protein                                |
| MGST2       | -1.023 | 0.00454 | 204168_at   | microsomal glutathione S-transferase 2                                |
| YME1L1      | 0.945  | 0.00454 | 201351_s_at | YME1-like 1 (S. cerevisiae)                                           |
| OGFOD1      | 1.045  | 0.00454 | 225106_s_at | 2-oxoglutarate and iron-dependent oxygenase domain containing 1       |
| CENPC1      | -1.114 | 0.00459 | 204739_at   | centromere protein C 1                                                |
| REM1        | -1.587 | 0.00461 | 210300_at   | RAS (RAD and GEM)-like GTP-binding 1                                  |
| GMNN        | 1.239  | 0.00461 | 218350_s_at | geminin, DNA replication inhibitor                                    |
| SRPRB       | 1.572  | 0.00466 | 227737_at   | signal recognition particle receptor, B subunit                       |
| DLC1        | -2.198 | 0.00475 | 224822_at   | deleted in liver cancer 1                                             |
| SARM1       | 2.837  | 0.00477 | 213259_s_at | sterile alpha and TIR motif containing 1                              |
| ZNF204P     | -2.305 | 0.00479 | 214823_at   | zinc finger protein 204, pseudogene                                   |
| DYNLRB1     | 0.639  | 0.00479 | 217918_at   | dynein, light chain, roadblock-type 1                                 |
| ZNF608      | -2.014 | 0.00487 | 229817_at   | zinc finger protein 608                                               |
| NUDT5       | 1.169  | 0.00492 | 223100_s_at | nudix (nucleoside diphosphate linked moiety X)-type motif 5           |
| CCDC69      | -2.384 | 0.00492 | 212886_at   | coiled-coil domain containing 69                                      |
| A2M         | -1.81  | 0.00499 | 217757_at   | alpha-2-macroglobulin                                                 |
| ZWILCH      | 1.32   | 0.00499 | 222606_at   | Zwilch, kinetochore associated, homolog (Drosophila)                  |
| WDR4        | 0.897  | 0.005   | 241937_s_at | WD repeat domain 4                                                    |
| PIIB        | 1.511  | 0.005   | 200968_s_at | peptidylprolyl isomerase B (cyclophilin B)                            |
| SLITRK4     | 2.705  | 0.005   | 230680_at   | SLIT and NTRK-like family, member 4                                   |
| SOS1        | -0.773 | 0.00501 | 212780_at   | son of sevenless homolog 1 (Drosophila)                               |
| LINC00312   | -2.777 | 0.00504 | 220244_at   | long intergenic non-protein coding RNA 312                            |
| IL1RAP      | 1.79   | 0.00506 | 205227_at   | interleukin 1 receptor accessory protein                              |
| SYNPO2      | -2.267 | 0.00508 | 225720_at   | synaptopodin 2                                                        |

|          |        |         |              |                                                                                                |
|----------|--------|---------|--------------|------------------------------------------------------------------------------------------------|
| MANSC1   | -1.682 | 0.00514 | 220945_x_at  | MANSC domain containing 1                                                                      |
| PDE4A    | -1.304 | 0.00514 | 204735_at    | phosphodiesterase 4A, cAMP-specific                                                            |
| PTPN14   | 1.4    | 0.00514 | 244533_at    | protein tyrosine phosphatase, non-receptor type 14                                             |
| RGS2     | -3.135 | 0.00516 | 202388_at    | regulator of G-protein signaling 2, 24kDa                                                      |
| ERG      | -2.636 | 0.00516 | 213541_s_at  | v-vets erythroblastosis virus E26 oncogene homolog (avian)                                     |
| NACC2    | 1.217  | 0.00524 | 212993_at    | NACC family member 2, BEN and BTB (POZ) domain containing                                      |
| FMO3     | -3.168 | 0.00524 | 40665_at     | flavin containing monooxygenase 3                                                              |
| GTPBP4   | 0.709  | 0.00524 | 218239_s_at  | GTP binding protein 4                                                                          |
| TMED2    | 0.807  | 0.00524 | 200087_s_at  | transmembrane emp24 domain trafficking protein 2                                               |
| STRBP    | 1.348  | 0.00524 | 233252_s_at  | spermatid perinuclear RNA binding protein                                                      |
| RSPO3    | -3.724 | 0.00525 | 228186_s_at  | R-spondin 3                                                                                    |
| SPRY1    | -2.914 | 0.00525 | 212558_at    | sprouty homolog 1, antagonist of FGF signaling (Drosophila)                                    |
| SH3BGR2  | -2.056 | 0.00525 | 225354_s_at  | SH3 domain binding glutamic acid-rich protein like 2                                           |
| PTDSS2   | 0.696  | 0.00525 | 221005_s_at  | phosphatidylserine synthase 2                                                                  |
| MPHOSPH9 | 1.117  | 0.00525 | 1558369_at   | M-phase phosphoprotein 9                                                                       |
| ZKSCAN1  | 1.159  | 0.00525 | 1557953_at   | zinc finger with KRAB and SCAN domains 1                                                       |
| ILF2     | 0.961  | 0.00527 | 200052_s_at  | interleukin enhancer binding factor 2, 45kDa                                                   |
| SNRPC    | 0.901  | 0.00528 | 201342_at    | small nuclear ribonucleoprotein polypeptide C                                                  |
| CPED1    | -2.079 | 0.0053  | 228728_at    | cadherin-like and PC-esterase domain containing 1                                              |
| FLJ35934 | 2.228  | 0.00536 | 1564383_s_at | FLJ35934                                                                                       |
| PLA2G4C  | -2.291 | 0.00541 | 209785_s_at  | phospholipase A2, group IVC (cytosolic, calcium-independent)                                   |
| MTUS1    | -1.544 | 0.00541 | 212095_s_at  | microtubule associated tumor suppressor 1                                                      |
| HSPA4L   | 1.733  | 0.00541 | 205543_at    | heat shock 70kDa protein 4-like                                                                |
| CSE1L    | 1.152  | 0.00545 | 201111_at    | CSE1 chromosome segregation 1-like (yeast)                                                     |
| RFC4     | 1.578  | 0.00547 | 204023_at    | replication factor C (activator 1) 4, 37kDa                                                    |
| C19orf21 | 2.136  | 0.00547 | 212925_at    | chromosome 19 open reading frame 21                                                            |
| FXID6    | -2.554 | 0.0056  | 217897_at    | FXID domain containing ion transport regulator 6                                               |
| ZNF148   | 0.8    | 0.0056  | 203319_s_at  | zinc finger protein 148                                                                        |
| CCT3     | 0.972  | 0.0056  | 200910_at    | chaperonin containing TCP1, subunit 3 (gamma)                                                  |
| C16orf54 | -2.398 | 0.00567 | 1559584_a_at | chromosome 16 open reading frame 54                                                            |
| P5MD7    | 0.456  | 0.00567 | 201705_at    | proteasome (prosome, macropain) 26S subunit, non-ATPase, 7                                     |
| DTYMK    | 0.778  | 0.00567 | 203270_at    | deoxythymidylate kinase (thymidylate kinase)                                                   |
| NFB      | -1.558 | 0.00573 | 209290_s_at  | nuclear factor I/B                                                                             |
| WDR12    | 0.837  | 0.00573 | 218512_at    | WD repeat domain 12                                                                            |
| BMP2     | -3.63  | 0.00574 | 205289_at    | bone morphogenetic protein 2                                                                   |
| LRRC70   | -2.564 | 0.00574 | 238488_at    | importin 11 /// leucine rich repeat containing 70                                              |
| SHANK3   | -2.262 | 0.00574 | 227923_at    | SH3 and multiple ankyrin repeat domains 3                                                      |
| HSPA12B  | -2.177 | 0.00574 | 229172_at    | heat shock 70kD protein 12B                                                                    |
| GNG11    | -2.151 | 0.00574 | 204115_at    | guanine nucleotide binding protein (G protein), gamma 11                                       |
| RBMS3    | -1.785 | 0.00574 | 235570_at    | RNA binding motif, single stranded interacting protein 3                                       |
| TCF4     | -1.292 | 0.00574 | 228837_at    | transcription factor 4                                                                         |
| INPP5A   | -1.248 | 0.00574 | 203006_at    | inositol polyphosphate-5-phosphatase, 40kDa                                                    |
| RC3H1    | -0.806 | 0.00574 | 225893_at    | ring finger and CCHH-type domains 1                                                            |
| SEC22A   | 0.51   | 0.00574 | 218703_at    | SEC22 vesicle trafficking protein homolog A (S. cerevisiae)                                    |
| NSMCE1   | 0.772  | 0.00574 | 224666_at    | non-SMC element 1 homolog (S. cerevisiae)                                                      |
| AGGF1    | 0.8    | 0.00574 | 218534_s_at  | angiogenic factor with G patch and FHA domains 1                                               |
| GTF2A2   | 0.943  | 0.0058  | 202678_at    | general transcription factor IIA, 2, 12kDa                                                     |
| RPL26L1  | 1.025  | 0.00585 | 218830_at    | ribosomal protein L26-like 1                                                                   |
| CCT2     | 0.771  | 0.00586 | 201947_s_at  | chaperonin containing TCP1, subunit 2 (beta)                                                   |
| NUP37    | 1.074  | 0.00593 | 218622_at    | nucleoporin 37kDa                                                                              |
| C4orf32  | -2.11  | 0.00593 | 227856_at    | chromosome 4 open reading frame 32                                                             |
| PDIA3    | 1.192  | 0.00593 | 208612_at    | protein disulfide isomerase family A, member 3                                                 |
| GTF2H2   | 1.976  | 0.00593 | 223758_s_at  | general transcription factor IIH, polypeptide 2, 44kDa                                         |
| DSP      | 3.108  | 0.00593 | 200606_at    | desmoplakin                                                                                    |
| RBM14    | 0.396  | 0.00595 | 204178_s_at  | RNA binding motif protein 14                                                                   |
| SCARF1   | -1.803 | 0.00598 | 206995_x_at  | scavenger receptor class F, member 1                                                           |
| CDK2AP1  | 0.625  | 0.00598 | 201938_at    | cyclin-dependent kinase 2 associated protein 1                                                 |
| GATA2    | -2.293 | 0.00599 | 209710_at    | GATA binding protein 2                                                                         |
| IGSF10   | -3.474 | 0.00604 | 230670_at    | immunoglobulin superfamily, member 10                                                          |
| ELTD1    | -2.179 | 0.00605 | 219134_at    | EGF, latrophilin and seven transmembrane domain containing 1                                   |
| NSUN2    | 0.815  | 0.00606 | 223076_s_at  | NOP2/Sun RNA methyltransferase family, member 2                                                |
| MLLT7    | -0.939 | 0.00609 | 224784_at    | myeloid/lymphoid or mixed-lineage leukemia (trithorax homolog, Drosophila); translocated to, 6 |
| PGM5-AS1 | -3.308 | 0.00617 | 230595_at    | uncharacterized LOC100653336 /// PGM5 antisense RNA 1 (non-protein coding)                     |
| SNORA28  | -1.262 | 0.00617 | 241843_at    | eukaryotic translation initiation factor 5 /// small nucleolar RNA, H/ACA box 28               |
| KIAA1217 | 1.547  | 0.00617 | 1554438_at   | KIAA1217                                                                                       |
| GGPS1    | 0.689  | 0.00623 | 202322_s_at  | geranylgeranyl diphosphate synthase 1                                                          |
| WDR41    | 1.282  | 0.00623 | 222503_s_at  | WD repeat domain 41                                                                            |
| KCNJ8    | -1.662 | 0.00625 | 205304_s_at  | potassium inwardly-rectifying channel, subfamily J, member 8                                   |
| CC2D2A   | -1.287 | 0.00625 | 234936_s_at  | coiled-coil and C2 domain containing 2A                                                        |
| CNOT1    | 0.511  | 0.00629 | 200860_s_at  | CCR4-NOT transcription complex, subunit 1                                                      |
| CACYBP   | 1.083  | 0.00629 | 210691_s_at  | calyculin binding protein                                                                      |
| TNPO3    | 0.665  | 0.00632 | 212318_at    | transportin 3                                                                                  |
| MYCBP    | 1.089  | 0.00635 | 203360_s_at  | gap junction protein, alpha 9, 59kDa /// GJA9-MYCBP readthrough /// c-myc binding protein      |
| GLI2     | 1.505  | 0.00635 | 228537_at    | GLI family zinc finger 2                                                                       |
| LMOD1    | -2.966 | 0.00664 | 203766_s_at  | leiomodin 1 (smooth muscle)                                                                    |

|           |        |         |               |                                                                                |
|-----------|--------|---------|---------------|--------------------------------------------------------------------------------|
| ZFP36     | -3.253 | 0.00672 | 201531_at     | zinc finger protein 36, C3H type, homolog (mouse)                              |
| KLF9      | -1.72  | 0.00674 | 230636_s_at   | Kruppel-like factor 9                                                          |
| TMEM9     | 1.66   | 0.00675 | 222987_s_at   | transmembrane protein 9                                                        |
| S100A4    | -1.738 | 0.00678 | 203186_s_at   | S100 calcium binding protein A4                                                |
| MEMO1     | 0.749  | 0.00682 | 219065_s_at   | dpy-30 homolog (C. elegans) /// mediator of cell motility 1                    |
| FUT1      | -2.302 | 0.00683 | 206109_at     | fucosyltransferase 1 (galactoside 2-alpha-L-fucosyltransferase, H blood group) |
| COG5      | 0.581  | 0.00683 | 203629_s_at   | component of oligomeric golgi complex 5                                        |
| NUDT15    | 0.76   | 0.00689 | 219347_at     | nudix (nucleoside diphosphate linked moiety X)-type motif 15                   |
| NHP2      | 1.044  | 0.00669 | 209104_s_at   | NHP2 ribonucleoprotein homolog (yeast)                                         |
| LSM7      | 1.081  | 0.00669 | 204559_s_at   | LSM7 homolog, U6 small nuclear RNA associated (S. cerevisiae)                  |
| FAM136A   | 0.686  | 0.00669 | 215947_s_at   | family with sequence similarity 136, member A                                  |
| HN1L      | 1.039  | 0.00694 | 212109_at     | hematological and neurological expressed 1-like                                |
| LINC00341 | -2.275 | 0.00698 | 219563_at     | long intergenic non-protein coding RNA 341                                     |
| B3GAT3    | 0.777  | 0.00698 | 35179_at      | beta-1,3-glucuronyltransferase 3 (glucuronosyltransferase I)                   |
| GPR116    | -2.623 | 0.00699 | 212950_at     | G protein-coupled receptor 116                                                 |
| TNS1      | -1.831 | 0.00699 | 221748_s_at   | tensin 1                                                                       |
| FRAT1     | -0.991 | 0.00699 | 219889_at     | frequently rearranged in advanced T-cell lymphomas                             |
| PHB       | 1.089  | 0.00699 | 200658_s_at   | prohibitin                                                                     |
| MECOM     | -2.921 | 0.00703 | 226420_at     | MDS1 and EVI1 complex locus                                                    |
| RASIP1    | -2.66  | 0.00706 | 220027_s_at   | Ras interacting protein 1                                                      |
| PIGB      | 0.85   | 0.00706 | 242760_x_x_at | phosphatidylinositol glycan anchor biosynthesis, class B                       |
| LMNB2     | 1.668  | 0.00714 | 216952_s_at   | lamin B2                                                                       |
| CYGB      | -1.963 | 0.00719 | 226632_at     | cytoglobin                                                                     |
| NME1      | 1.752  | 0.00723 | 201577_at     | NME/NM23 nucleoside diphosphate kinase 1                                       |
| POGK      | 0.6    | 0.00728 | 218229_s_at   | pogo transposable element with KRAB domain                                     |
| HCCS      | 0.557  | 0.00739 | 203745_at     | holocytochrome c synthase                                                      |
| UHMK1     | 1.095  | 0.0074  | 235003_at     | U2AF homology motif (UHM) kinase 1                                             |
| PHLDA1    | -2.504 | 0.00743 | 217996_at     | pleckstrin homology-like domain, family A, member 1                            |
| HHEX      | -1.934 | 0.00743 | 204689_at     | hematopoietically expressed homeobox                                           |
| CYSLTR1   | -1.614 | 0.00743 | 230866_at     | cysteiny leukotriene receptor 1                                                |
| PWP1      | 0.702  | 0.00743 | 201608_s_at   | PWP1 homolog (S. cerevisiae)                                                   |
| TRIM27    | 0.754  | 0.00743 | 212116_at     | tripartite motif containing 27                                                 |
| TIMELESS  | 1.358  | 0.00743 | 203046_s_at   | timeless homolog (Drosophila)                                                  |
| ZNF738    | 1.716  | 0.00743 | 229700_at     | zinc finger protein 738                                                        |
| COBLL1    | 1.825  | 0.00743 | 203642_s_at   | COBL-like 1                                                                    |
| PDPN      | 2.246  | 0.00743 | 226658_at     | podoplanin                                                                     |
| ARID5B    | -1.52  | 0.00747 | 212614_at     | AT rich interactive domain 5B (MRF1-like)                                      |
| GEM       | -2.295 | 0.0075  | 204472_at     | GTP binding protein overexpressed in skeletal muscle                           |
| ORC5      | 0.806  | 0.00751 | 211212_s_at   | origin recognition complex, subunit 5                                          |
| JAM2      | -2.302 | 0.00753 | 219213_at     | junctional adhesion molecule 2                                                 |
| ZNF79     | 0.447  | 0.00753 | 216486_x_x_at | zinc finger protein 79                                                         |
| PFDN6     | 0.957  | 0.00754 | 233588_x_x_at | prefoldin subunit 6                                                            |
| RBBP4     | 0.82   | 0.00762 | 217301_x_x_at | retinoblastoma binding protein 4                                               |
| RCAN2     | -2.506 | 0.00763 | 203498_at     | regulator of calcineurin 2                                                     |
| ING2      | -0.791 | 0.00765 | 205981_s_at   | inhibitor of growth family, member 2                                           |
| TSC22D3   | -1.714 | 0.00767 | 208763_s_at   | TSC22 domain family, member 3                                                  |
| COL21A1   | -2.605 | 0.00775 | 208096_s_at   | collagen, type XXI, alpha 1                                                    |
| UMPS      | 0.705  | 0.00775 | 202706_s_at   | uridine monophosphate synthetase                                               |
| AATF      | 0.775  | 0.00777 | 209165_at     | apoptosis antagonizing transcription factor                                    |
| SLC35A2   | 1.146  | 0.00778 | 209326_at     | solute carrier family 35 (UDP-galactose transporter), member A2                |
| SLC30A6   | 0.684  | 0.00779 | 243643_x_x_at | solute carrier family 30 (zinc transporter), member 6                          |
| RNF180    | -2.638 | 0.0078  | 242033_at     | ring finger protein 180                                                        |
| RER1      | 0.802  | 0.0078  | 202297_s_at   | RER1 retention in endoplasmic reticulum 1 homolog (S. cerevisiae)              |
| LSM12     | 0.989  | 0.0078  | 212532_s_at   | LSM12 homolog (S. cerevisiae)                                                  |
| COPB2     | 0.907  | 0.00782 | 201098_at     | coatomer protein complex, subunit beta 2 (beta prime)                          |
| CKAP5     | 0.752  | 0.00784 | 212832_s_at   | cytoskeleton associated protein 5                                              |
| TMEM135   | 0.853  | 0.00784 | 208810_at     | DnaJ (Hsp40) homolog, subfamily B, member 6 /// transmembrane protein 135      |
| EI24      | 0.623  | 0.00792 | 216396_s_at   | etoposide induced 2.4 mRNA                                                     |
| RRM1      | 0.727  | 0.00792 | 201477_s_at   | ribonucleotide reductase M1                                                    |
| MAGI3     | -1.932 | 0.00794 | 226770_at     | membrane associated guanylate kinase, WW and PDZ domain containing 3           |
| AP3M1     | 0.63   | 0.00796 | 222516_at     | adaptor-related protein complex 3, mu 1 subunit                                |
| HPGD      | -4.167 | 0.008   | 203914_x_x_at | hydroxyprostaglandin dehydrogenase 15-(NAD)                                    |
| P2RY14    | -2.691 | 0.008   | 206637_at     | purinergic receptor P2Y, G-protein coupled, 14                                 |
| IL33      | -2.65  | 0.008   | 209821_at     | interleukin 33                                                                 |
| PER3      | -2.243 | 0.008   | 221045_s_at   | period homolog 3 (Drosophila)                                                  |
| ZNF704    | -1.912 | 0.008   | 223366_at     | zinc finger protein 704                                                        |
| CBX7      | -1.474 | 0.008   | 212914_at     | chromobox homolog 7                                                            |
| NR3C1     | -0.721 | 0.008   | 201865_x_x_at | nuclear receptor subfamily 3, group C, member 1 (glucocorticoid receptor)      |
| AP3D1     | 0.627  | 0.008   | 206592_s_at   | adaptor-related protein complex 3, delta 1 subunit                             |
| CY5B5     | 0.781  | 0.008   | 201634_s_at   | cytochrome b5 type B (outer mitochondrial membrane)                            |
| MRPL17    | 0.873  | 0.008   | 222216_s_at   | mitochondrial ribosomal protein L17                                            |
| TMEM48    | 0.893  | 0.008   | 234672_s_at   | transmembrane protein 48                                                       |
| MEA1      | 0.922  | 0.008   | 218061_at     | male-enhanced antigen 1                                                        |
| RPS27L    | 1.104  | 0.008   | 222487_s_at   | ribosomal protein S27-like                                                     |
| MESDC2    | 1.107  | 0.008   | 224679_at     | mesoderm development candidate 2                                               |

|             |        |         |              |                                                                                                                                                                                                                                                  |
|-------------|--------|---------|--------------|--------------------------------------------------------------------------------------------------------------------------------------------------------------------------------------------------------------------------------------------------|
| LMBR1       | 1.25   | 0.008   | 224410_s_at  | limb region 1 homolog (mouse)                                                                                                                                                                                                                    |
| UCK2        | 1.318  | 0.008   | 209825_s_at  | microRNA 3658 /// uridine-cytidine kinase 2                                                                                                                                                                                                      |
| RAN         | 1.456  | 0.008   | 200750_s_at  | RAN, member RAS oncogene family                                                                                                                                                                                                                  |
| NUP155      | 1.542  | 0.008   | 206550_s_at  | nucleoporin 155kDa                                                                                                                                                                                                                               |
| OIP5        | 1.93   | 0.008   | 213599_at    | Opa interacting protein 5                                                                                                                                                                                                                        |
| SH3RF2      | 3.465  | 0.008   | 228892_at    | SH3 domain containing ring finger 2                                                                                                                                                                                                              |
| COPG1       | 0.919  | 0.008   | 217749_at    | coatamer protein complex, subunit gamma 1                                                                                                                                                                                                        |
| SEC61A1     | 1.258  | 0.00804 | 217716_s_at  | Sec61 alpha 1 subunit (S. cerevisiae)                                                                                                                                                                                                            |
| CENPN       | 2.784  | 0.0081  | 219555_s_at  | centromere protein N                                                                                                                                                                                                                             |
| SMC2        | 0.977  | 0.00814 | 213253_at    | structural maintenance of chromosomes 2                                                                                                                                                                                                          |
| CD109       | -2.036 | 0.00823 | 226545_at    | CD109 molecule                                                                                                                                                                                                                                   |
| BTG1        | -1.11  | 0.00828 | 200921_s_at  | B-cell translocation gene 1, anti-proliferative                                                                                                                                                                                                  |
| NTMT1       | 1.233  | 0.0083  | 223369_at    | N-terminal Xaa-Pro-Lys N-methyltransferase 1                                                                                                                                                                                                     |
| FILIP1L     | -2.017 | 0.00831 | 204135_at    | filamin A interacting protein 1-like                                                                                                                                                                                                             |
| SLC10A7     | -0.692 | 0.00831 | 235143_at    | solute carrier family 10 (sodium/bile acid cotransporter family), member 7                                                                                                                                                                       |
| PTPRO       | -1.156 | 0.00837 | 211600_at    | protein tyrosine phosphatase, receptor type, O                                                                                                                                                                                                   |
| SLCGA16     | -1.557 | 0.00838 | 1569940_at   | Solute carrier family 6, member 16                                                                                                                                                                                                               |
| FANCA       | 1.689  | 0.00839 | 236976_at    | Fanconi anemia, complementation group A                                                                                                                                                                                                          |
| ACSL5       | -1.667 | 0.00846 | 218322_s_at  | acyl-CoA synthetase long-chain family member 5                                                                                                                                                                                                   |
| TMEM199     | 0.613  | 0.00846 | 225374_at    | microRNA 4723 /// transmembrane protein 199                                                                                                                                                                                                      |
| TMPO        | 1.713  | 0.00846 | 203432_at    | thymopoietin                                                                                                                                                                                                                                     |
| SNAPC5      | 0.799  | 0.00846 | 213203_at    | small nuclear RNA activating complex, polypeptide 5, 19kDa                                                                                                                                                                                       |
| TFAP2A      | 4.614  | 0.00847 | 204653_at    | transcription factor AP-2 alpha (activating enhancer binding protein 2 alpha)                                                                                                                                                                    |
| FARSA       | 1.09   | 0.00857 | 202159_at    | phenylalanyl-tRNA synthetase, alpha subunit                                                                                                                                                                                                      |
| G3BP1       | 1.148  | 0.00857 | 201514_s_at  | GTPase activating protein (SH3 domain) binding protein 1                                                                                                                                                                                         |
| OIP5-AS1    | 1.305  | 0.00857 | 231808_at    | OIP5 antisense RNA 1 (non-protein coding)                                                                                                                                                                                                        |
| NTAN1       | -0.974 | 0.00857 | 213061_s_at  | N-terminal asparagine amidase                                                                                                                                                                                                                    |
| ILF3        | 1.05   | 0.00857 | 217805_at    | interleukin enhancer binding factor 3, 90kDa                                                                                                                                                                                                     |
| CALLU       | 1.454  | 0.00857 | 200755_s_at  | calumenin                                                                                                                                                                                                                                        |
| ZMYM4       | 0.461  | 0.00862 | 202049_s_at  | zinc finger, MYM-type 4                                                                                                                                                                                                                          |
| KHNYN       | -0.923 | 0.00864 | 212356_at    | KH and NYN domain containing                                                                                                                                                                                                                     |
| FHL5        | -3.202 | 0.00866 | 220170_at    | four and a half LIM domains 5                                                                                                                                                                                                                    |
| EFM2A       | -1.21  | 0.00872 | 205231_s_at  | epilepsy, progressive myoclonus type 2A, Lafora disease (laforin)                                                                                                                                                                                |
| GALM        | -1.135 | 0.00874 | 234974_at    | galactose mutarotase (aldose 1-epimerase)                                                                                                                                                                                                        |
| IPP         | 1.275  | 0.00877 | 1554740_a_at | intracisternal A particle-promoted polypeptide                                                                                                                                                                                                   |
| PHF17       | -0.98  | 0.0088  | 225816_at    | PHD finger protein 17                                                                                                                                                                                                                            |
| THRB        | -2.541 | 0.00884 | 228716_at    | thyroid hormone receptor, beta                                                                                                                                                                                                                   |
| LOC10050581 | -1.432 | 0.00885 | 242521_at    | uncharacterized LOC100505812                                                                                                                                                                                                                     |
| GCN1L1      | 0.968  | 0.00885 | 216232_s_at  | GCN1 general control of amino-acid synthesis 1-like 1 (yeast)                                                                                                                                                                                    |
| AIMP2       | 0.749  | 0.00889 | 202138_x_at  | aminoacyl tRNA synthetase complex-interacting multifunctional protein 2                                                                                                                                                                          |
| DNALI1      | -2.049 | 0.00889 | 227081_at    | dynein, axonemal, light intermediate chain 1                                                                                                                                                                                                     |
| DCAF13      | 0.896  | 0.00891 | 225676_s_at  | DDB1 and CUL4 associated factor 13                                                                                                                                                                                                               |
| RREB1       | -0.834 | 0.00892 | 228487_s_at  | Ras responsive element binding protein 1                                                                                                                                                                                                         |
| NCBP2       | 1.325  | 0.00892 | 201521_s_at  | nuclear cap binding protein subunit 2, 20kDa                                                                                                                                                                                                     |
| MNF1        | 1.37   | 0.00892 | 224448_s_at  | mitochondrial nucleoid factor 1                                                                                                                                                                                                                  |
| PRKC1       | 1.407  | 0.00894 | 213518_at    | protein kinase C, iota                                                                                                                                                                                                                           |
| PPM1F       | -1.128 | 0.00895 | 203063_at    | protein phosphatase, Mg2+/Mn2+ dependent, 1F                                                                                                                                                                                                     |
| FAM126A     | -1.547 | 0.00903 | 227239_at    | family with sequence similarity 126, member A                                                                                                                                                                                                    |
| CNRIP1      | -1.804 | 0.00905 | 226751_at    | cannabinoid receptor interacting protein 1                                                                                                                                                                                                       |
| SCAMP3      | 0.821  | 0.00906 | 201771_at    | secretory carrier membrane protein 3                                                                                                                                                                                                             |
| PRDM1       | -1.771 | 0.00909 | 228964_at    | PR domain containing 1, with ZNF domain                                                                                                                                                                                                          |
| C9orf72     | -1.435 | 0.00909 | 225919_s_at  | chromosome 9 open reading frame 72                                                                                                                                                                                                               |
| SAMD13      | -1.032 | 0.00909 | 229402_at    | sterile alpha motif domain containing 13                                                                                                                                                                                                         |
| IQSEC1      | -0.935 | 0.00909 | 203906_at    | IQ motif and Sec7 domain 1                                                                                                                                                                                                                       |
| AAGAB       | 1.094  | 0.00909 | 202852_s_at  | alpha- and gamma-adaptin binding protein                                                                                                                                                                                                         |
| TMEM100     | -3.266 | 0.00913 | 219230_at    | transmembrane protein 100                                                                                                                                                                                                                        |
| C5orf51     | 0.844  | 0.00919 | 226159_at    | chromosome 5 open reading frame 51                                                                                                                                                                                                               |
| WDR5B       | 0.968  | 0.00919 | 219538_at    | WD repeat domain 5B                                                                                                                                                                                                                              |
| PID1        | -2.534 | 0.00921 | 219093_at    | phosphotyrosine interaction domain containing 1                                                                                                                                                                                                  |
| LSM5        | 0.855  | 0.00933 | 211747_s_at  | LSM5 homolog, U6 small nuclear RNA associated (S. cerevisiae)                                                                                                                                                                                    |
| WNT3        | 1.945  | 0.00935 | 229103_at    | wingless-type MMTV integration site family, member 3                                                                                                                                                                                             |
| MYCT1       | -2.429 | 0.00942 | 231947_at    | myc target 1                                                                                                                                                                                                                                     |
| TMCO1       | 0.719  | 0.00943 | 208716_s_at  | transmembrane and coiled-coil domains 1                                                                                                                                                                                                          |
| TPSB2       | -2.818 | 0.00952 | 216474_x_at  | tryptase alpha/beta 1 /// tryptase beta 2 (gene/pseudogene)                                                                                                                                                                                      |
| GORASP2     | 0.402  | 0.00952 | 208843_s_at  | golgi reassembly stacking protein 2, 55kDa                                                                                                                                                                                                       |
| SLC39A6     | 0.779  | 0.00952 | 202088_at    | solute carrier family 39 (zinc transporter), member 6                                                                                                                                                                                            |
| LRCH1       | -1.46  | 0.00956 | 226795_at    | leucine-rich repeats and calponin homology (CH) domain containing 1                                                                                                                                                                              |
| MCM4        | 1.523  | 0.00957 | 222036_s_at  | minichromosome maintenance complex component 4                                                                                                                                                                                                   |
| TPTE2P2     | -1.555 | 0.00958 | 219477_s_at  | mitochondrial ribosomal protein S31 pseudogene 3 /// thrombospondin, type 1, domain containing 1 /// thrombospondin, type 1, domain containing 1 pseudogene 1 /// transmembrane phosphoinositide 3-phosphatase and tensin homolog 2 pseudogene 2 |
| HNMT        | -1.518 | 0.00958 | 228772_at    | histamine N-methyltransferase                                                                                                                                                                                                                    |
| C11orf48    | 0.549  | 0.0096  | 221637_s_at  | chromosome 11 open reading frame 48                                                                                                                                                                                                              |
| PRKAR1A     | 1.406  | 0.00961 | 200604_s_at  | protein kinase, cAMP-dependent, regulatory, type 1, alpha (tissue specific extinguisher 1)                                                                                                                                                       |
| ADORA3      | 1.912  | 0.00961 | 206171_at    | adenosine A3 receptor                                                                                                                                                                                                                            |
| PRCP        | -1.33  | 0.00964 | 201494_at    | prolylcarboxypeptidase (angiotensinase C)                                                                                                                                                                                                        |
| PSMA7       | 0.931  | 0.00964 | 216088_s_at  | proteasome (prosome, macropain) subunit, alpha type, 7                                                                                                                                                                                           |

|             |        |         |              |                                                                                                                                                                                                                                                                                                                                                                                                                                                                                                                                                                                                                                                                                                                                                                                                                                                                                                                                                                                                                                                                                                                                                                                                                                                                                                                                                                                                                                                                                                                                                                                                                                                                                                                                                                                                                                                                                                                                                                                                                                                                                                                                                                                                                                                                                                                                                                                                                                                                                                                                                                                                                                                                                                                                                                                                                                                                                                                                                                                                                                                                                                                                                                                                                                                                                                                                                                                                                                                                                                                                                                                                                                                                                                                                                                                                                                                                                                                                                                                                                                                                                                                                                                                                                                                                                                                                                                                                                                                                                                                                                                                                                                                                                                                                                                                                                                                                                                                                                                                                                                                                                                                                                                                                                                                                                                                                                                                                                                                                                                                                                                                                                                                                                                                                                                                                                                                                                                                                                                                                                                                                                                                                                                                                                                                                                                                                                                                                                                                                                                                                                                                                                                                                                                                                                                                                                                                                                                                                                                                                                                                                                                                                                                                                                                                                                                                                                                                                                                                                                                                                                                                                                                                                                                                                                                                                                                                                                                                                                                                                                                                                                                                                                                                                                                                                                                                                                                                                                                                                                                                                                                                                                                                                                                                                                                                                                                                                                                                                                                                                                                                                                                                                                                                                                                                                                                                                                                                                                                                                                                                                                                                                                                                                                                                                                                                                                                                                                                                                                                                                                                                                                                                                                                                                                                                                                                                                                                                                                                                                                                                                                                                                                                                                                                                                                                                                                                                                                                                                                                                                                                                                                                                                                                                                                                                                                                                                                                                                                                                                                                                                                                                                                                                                                                                                                                                                                                                                                                                                                                                                                                                                                                                                                                                                                                                                                                                                                                                                                                                                                                                                                                                                                                                                                                                                                                                                                                                                                                                                                                                                                                                                                                                                                                                                                                                                                                                                                                                                                                                                                                                                                                                                                                                                                                                                                                                                                                                                                                                                                                                                                                                                                                                                                                                                                                                                                                                                                                                                                                                                                                                                                                                                                                                                                                                                                                                                                                                                                                                                                                                                                                                                                                                                                                                                                                                                                                                                                                                                                                                                                                                                                                                                                                                                                                                                                                                                                                                                                                                                                                                                                                                                                                                                                                                                                                                                                                                                                                                                                                                                                                                                                                                                                                                                                                                                                                                                                                                                                                                                                                                                                                                                                                                                                                                                                                                                                                                                                                                                                                                                                                                                                                                                                                                                                                                                                                                                                                                                                                                                                                                                                                                                                                                                                                                                                                                                                                                                                                                                                                                                                                                                                                                                                                                                                                                                                                                                                                                                                                                                                                                                                                                                                                                                                                                                                                                                                                                                                                                                                                                                                                                                                                                                                                                                                                                                                                                                                                                                                                                                                                                                                                                                                                                                                                                                                                                                                                                                                                                                                                                                                                                                                                                                                                                                                                                                                                               |
|-------------|--------|---------|--------------|-------------------------------------------------------------------------------------------------------------------------------------------------------------------------------------------------------------------------------------------------------------------------------------------------------------------------------------------------------------------------------------------------------------------------------------------------------------------------------------------------------------------------------------------------------------------------------------------------------------------------------------------------------------------------------------------------------------------------------------------------------------------------------------------------------------------------------------------------------------------------------------------------------------------------------------------------------------------------------------------------------------------------------------------------------------------------------------------------------------------------------------------------------------------------------------------------------------------------------------------------------------------------------------------------------------------------------------------------------------------------------------------------------------------------------------------------------------------------------------------------------------------------------------------------------------------------------------------------------------------------------------------------------------------------------------------------------------------------------------------------------------------------------------------------------------------------------------------------------------------------------------------------------------------------------------------------------------------------------------------------------------------------------------------------------------------------------------------------------------------------------------------------------------------------------------------------------------------------------------------------------------------------------------------------------------------------------------------------------------------------------------------------------------------------------------------------------------------------------------------------------------------------------------------------------------------------------------------------------------------------------------------------------------------------------------------------------------------------------------------------------------------------------------------------------------------------------------------------------------------------------------------------------------------------------------------------------------------------------------------------------------------------------------------------------------------------------------------------------------------------------------------------------------------------------------------------------------------------------------------------------------------------------------------------------------------------------------------------------------------------------------------------------------------------------------------------------------------------------------------------------------------------------------------------------------------------------------------------------------------------------------------------------------------------------------------------------------------------------------------------------------------------------------------------------------------------------------------------------------------------------------------------------------------------------------------------------------------------------------------------------------------------------------------------------------------------------------------------------------------------------------------------------------------------------------------------------------------------------------------------------------------------------------------------------------------------------------------------------------------------------------------------------------------------------------------------------------------------------------------------------------------------------------------------------------------------------------------------------------------------------------------------------------------------------------------------------------------------------------------------------------------------------------------------------------------------------------------------------------------------------------------------------------------------------------------------------------------------------------------------------------------------------------------------------------------------------------------------------------------------------------------------------------------------------------------------------------------------------------------------------------------------------------------------------------------------------------------------------------------------------------------------------------------------------------------------------------------------------------------------------------------------------------------------------------------------------------------------------------------------------------------------------------------------------------------------------------------------------------------------------------------------------------------------------------------------------------------------------------------------------------------------------------------------------------------------------------------------------------------------------------------------------------------------------------------------------------------------------------------------------------------------------------------------------------------------------------------------------------------------------------------------------------------------------------------------------------------------------------------------------------------------------------------------------------------------------------------------------------------------------------------------------------------------------------------------------------------------------------------------------------------------------------------------------------------------------------------------------------------------------------------------------------------------------------------------------------------------------------------------------------------------------------------------------------------------------------------------------------------------------------------------------------------------------------------------------------------------------------------------------------------------------------------------------------------------------------------------------------------------------------------------------------------------------------------------------------------------------------------------------------------------------------------------------------------------------------------------------------------------------------------------------------------------------------------------------------------------------------------------------------------------------------------------------------------------------------------------------------------------------------------------------------------------------------------------------------------------------------------------------------------------------------------------------------------------------------------------------------------------------------------------------------------------------------------------------------------------------------------------------------------------------------------------------------------------------------------------------------------------------------------------------------------------------------------------------------------------------------------------------------------------------------------------------------------------------------------------------------------------------------------------------------------------------------------------------------------------------------------------------------------------------------------------------------------------------------------------------------------------------------------------------------------------------------------------------------------------------------------------------------------------------------------------------------------------------------------------------------------------------------------------------------------------------------------------------------------------------------------------------------------------------------------------------------------------------------------------------------------------------------------------------------------------------------------------------------------------------------------------------------------------------------------------------------------------------------------------------------------------------------------------------------------------------------------------------------------------------------------------------------------------------------------------------------------------------------------------------------------------------------------------------------------------------------------------------------------------------------------------------------------------------------------------------------------------------------------------------------------------------------------------------------------------------------------------------------------------------------------------------------------------------------------------------------------------------------------------------------------------------------------------------------------------------------------------------------------------------------------------------------------------------------------------------------------------------------------------------------------------------------------------------------------------------------------------------------------------------------------------------------------------------------------------------------------------------------------------------------------------------------------------------------------------------------------------------------------------------------------------------------------------------------------------------------------------------------------------------------------------------------------------------------------------------------------------------------------------------------------------------------------------------------------------------------------------------------------------------------------------------------------------------------------------------------------------------------------------------------------------------------------------------------------------------------------------------------------------------------------------------------------------------------------------------------------------------------------------------------------------------------------------------------------------------------------------------------------------------------------------------------------------------------------------------------------------------------------------------------------------------------------------------------------------------------------------------------------------------------------------------------------------------------------------------------------------------------------------------------------------------------------------------------------------------------------------------------------------------------------------------------------------------------------------------------------------------------------------------------------------------------------------------------------------------------------------------------------------------------------------------------------------------------------------------------------------------------------------------------------------------------------------------------------------------------------------------------------------------------------------------------------------------------------------------------------------------------------------------------------------------------------------------------------------------------------------------------------------------------------------------------------------------------------------------------------------------------------------------------------------------------------------------------------------------------------------------------------------------------------------------------------------------------------------------------------------------------------------------------------------------------------------------------------------------------------------------------------------------------------------------------------------------------------------------------------------------------------------------------------------------------------------------------------------------------------------------------------------------------------------------------------------------------------------------------------------------------------------------------------------------------------------------------------------------------------------------------------------------------------------------------------------------------------------------------------------------------------------------------------------------------------------------------------------------------------------------------------------------------------------------------------------------------------------------------------------------------------------------------------------------------------------------------------------------------------------------------------------------------------------------------------------------------------------------------------------------------------------------------------------------------------------------------------------------------------------------------------------------------------------------------------------------------------------------------------------------------------------------------------------------------------------------------------------------------------------------------------------------------------------------------------------------------------------------------------------------------------------------------------------------------------------------------------------------------------------------------------------------------------------------------------------------------------------------------------------------------------------------------------------------------------------------------------------------------------------------------------------------------------------------------------------------------------------------------------------------------------------------------------------------------------------------------------------------------------------------------------------------------------------------------------------------------------------------------------------------------------------------------------------------------------------------------------------------------------------------------------------------------------------------------------------------------------------------------------------------------------------------------------------------------------------------------------------------------------------------------------------------------------------------------------------------------------------------------------------------------------------------------------------------------------------------------------------------------------------------------------------------------------------------------------------------------------------------------------------------------------------------------------------------------------------------------------------------------------------------------------------------------------------------------------------------------------------------------------------------------------------------------------------------------------------------------------------------------------------------------------------------------------------------------------------------------------------------------------------------------------------------------------------------------------------------------------------------------------------------------------------------------------------------------------------------------------------------------------------------------------------------------------------------------------------------------------------------------------------------------------------------------------------------------------------------------------------------------------------------------------------------------------------------------------------------------------------------------------------------------------------------------------------------------------------------------------------------------------------------------------------------------------------------------------------------------------------------------------------------------------------------------------------------------------------------------------------------------------------------------------------------------------------------------------------------------------------------------------------------------------------------------------------------------------------------------------------------------------------------------------------------------------------------------------------------------------------------------------------------------------------------------------------------------------------------------------------------------------------------------------------------------------------------------------------------------------------------------------------------------------------------------------------------------------------------------------------------------------------------------------------------------------------------------------------------------------------------------------------------------------------------------------------------------------------------------------------------------------------------------------------------------------------------------------------------------------------------------------------------------------------------------------------------------------------------------------------------------------------------------------------------------------------------------------------------------------------------------------------------------------------------------------------------------------------------------------------------------------------------------------------------------------------------------------------------------------------------------------------------------------------------------------------------------------------------------------------------------------------------------------------------------------------------------------------------------------------------------------------------------------------------------------------------------------------------------------------------------------------------------------------------------------------------------------------------------------------------------------------------------------------------------------------------------------------------------------------------------------------------------------------------------------------------------------------------------------------------------------------------------------------------------------------------------------------------------------------------------------------------------------------------------------------------------------------------------------------------------------------------------------------------------------------------------------------------|
| LIN7A       | -2.193 | 0.00972 | 227929_at    | lin-7 homolog A (C. elegans)                                                                                                                                                                                                                                                                                                                                                                                                                                                                                                                                                                                                                                                                                                                                                                                                                                                                                                                                                                                                                                                                                                                                                                                                                                                                                                                                                                                                                                                                                                                                                                                                                                                                                                                                                                                                                                                                                                                                                                                                                                                                                                                                                                                                                                                                                                                                                                                                                                                                                                                                                                                                                                                                                                                                                                                                                                                                                                                                                                                                                                                                                                                                                                                                                                                                                                                                                                                                                                                                                                                                                                                                                                                                                                                                                                                                                                                                                                                                                                                                                                                                                                                                                                                                                                                                                                                                                                                                                                                                                                                                                                                                                                                                                                                                                                                                                                                                                                                                                                                                                                                                                                                                                                                                                                                                                                                                                                                                                                                                                                                                                                                                                                                                                                                                                                                                                                                                                                                                                                                                                                                                                                                                                                                                                                                                                                                                                                                                                                                                                                                                                                                                                                                                                                                                                                                                                                                                                                                                                                                                                                                                                                                                                                                                                                                                                                                                                                                                                                                                                                                                                                                                                                                                                                                                                                                                                                                                                                                                                                                                                                                                                                                                                                                                                                                                                                                                                                                                                                                                                                                                                                                                                                                                                                                                                                                                                                                                                                                                                                                                                                                                                                                                                                                                                                                                                                                                                                                                                                                                                                                                                                                                                                                                                                                                                                                                                                                                                                                                                                                                                                                                                                                                                                                                                                                                                                                                                                                                                                                                                                                                                                                                                                                                                                                                                                                                                                                                                                                                                                                                                                                                                                                                                                                                                                                                                                                                                                                                                                                                                                                                                                                                                                                                                                                                                                                                                                                                                                                                                                                                                                                                                                                                                                                                                                                                                                                                                                                                                                                                                                                                                                                                                                                                                                                                                                                                                                                                                                                                                                                                                                                                                                                                                                                                                                                                                                                                                                                                                                                                                                                                                                                                                                                                                                                                                                                                                                                                                                                                                                                                                                                                                                                                                                                                                                                                                                                                                                                                                                                                                                                                                                                                                                                                                                                                                                                                                                                                                                                                                                                                                                                                                                                                                                                                                                                                                                                                                                                                                                                                                                                                                                                                                                                                                                                                                                                                                                                                                                                                                                                                                                                                                                                                                                                                                                                                                                                                                                                                                                                                                                                                                                                                                                                                                                                                                                                                                                                                                                                                                                                                                                                                                                                                                                                                                                                                                                                                                                                                                                                                                                                                                                                                                                                                                                                                                                                                                                                                                                                                                                                                                                                                                                                                                                                                                                                                                                                                                                                                                                                                                                                                                                                                                                                                                                                                                                                                                                                                                                                                                                                                                                                                                                                                                                                                                                                                                                                                                                                                                                                                                                                                                                                                                                                                                                                                                                                                                                                                                                                                                                                                                                                                                                                                                                                                                                                                                                                                                                                                                                                                                                                                                                                                                                                                                                                                                  |
| LYST        | -1.582 | 0.00972 | 203518_at    | lysosomal trafficking regulator                                                                                                                                                                                                                                                                                                                                                                                                                                                                                                                                                                                                                                                                                                                                                                                                                                                                                                                                                                                                                                                                                                                                                                                                                                                                                                                                                                                                                                                                                                                                                                                                                                                                                                                                                                                                                                                                                                                                                                                                                                                                                                                                                                                                                                                                                                                                                                                                                                                                                                                                                                                                                                                                                                                                                                                                                                                                                                                                                                                                                                                                                                                                                                                                                                                                                                                                                                                                                                                                                                                                                                                                                                                                                                                                                                                                                                                                                                                                                                                                                                                                                                                                                                                                                                                                                                                                                                                                                                                                                                                                                                                                                                                                                                                                                                                                                                                                                                                                                                                                                                                                                                                                                                                                                                                                                                                                                                                                                                                                                                                                                                                                                                                                                                                                                                                                                                                                                                                                                                                                                                                                                                                                                                                                                                                                                                                                                                                                                                                                                                                                                                                                                                                                                                                                                                                                                                                                                                                                                                                                                                                                                                                                                                                                                                                                                                                                                                                                                                                                                                                                                                                                                                                                                                                                                                                                                                                                                                                                                                                                                                                                                                                                                                                                                                                                                                                                                                                                                                                                                                                                                                                                                                                                                                                                                                                                                                                                                                                                                                                                                                                                                                                                                                                                                                                                                                                                                                                                                                                                                                                                                                                                                                                                                                                                                                                                                                                                                                                                                                                                                                                                                                                                                                                                                                                                                                                                                                                                                                                                                                                                                                                                                                                                                                                                                                                                                                                                                                                                                                                                                                                                                                                                                                                                                                                                                                                                                                                                                                                                                                                                                                                                                                                                                                                                                                                                                                                                                                                                                                                                                                                                                                                                                                                                                                                                                                                                                                                                                                                                                                                                                                                                                                                                                                                                                                                                                                                                                                                                                                                                                                                                                                                                                                                                                                                                                                                                                                                                                                                                                                                                                                                                                                                                                                                                                                                                                                                                                                                                                                                                                                                                                                                                                                                                                                                                                                                                                                                                                                                                                                                                                                                                                                                                                                                                                                                                                                                                                                                                                                                                                                                                                                                                                                                                                                                                                                                                                                                                                                                                                                                                                                                                                                                                                                                                                                                                                                                                                                                                                                                                                                                                                                                                                                                                                                                                                                                                                                                                                                                                                                                                                                                                                                                                                                                                                                                                                                                                                                                                                                                                                                                                                                                                                                                                                                                                                                                                                                                                                                                                                                                                                                                                                                                                                                                                                                                                                                                                                                                                                                                                                                                                                                                                                                                                                                                                                                                                                                                                                                                                                                                                                                                                                                                                                                                                                                                                                                                                                                                                                                                                                                                                                                                                                                                                                                                                                                                                                                                                                                                                                                                                                                                                                                                                                                                                                                                                                                                                                                                                                                                                                                                                                                                                                                                                                                                                                                                                                                                                                                                                                                                                                                                                                                                                                                                                               |
| DDX23       | 0.355  | 0.00972 | 40465_at     | DEAD (Asp-Glu-Ala-Asp) box polypeptide 23                                                                                                                                                                                                                                                                                                                                                                                                                                                                                                                                                                                                                                                                                                                                                                                                                                                                                                                                                                                                                                                                                                                                                                                                                                                                                                                                                                                                                                                                                                                                                                                                                                                                                                                                                                                                                                                                                                                                                                                                                                                                                                                                                                                                                                                                                                                                                                                                                                                                                                                                                                                                                                                                                                                                                                                                                                                                                                                                                                                                                                                                                                                                                                                                                                                                                                                                                                                                                                                                                                                                                                                                                                                                                                                                                                                                                                                                                                                                                                                                                                                                                                                                                                                                                                                                                                                                                                                                                                                                                                                                                                                                                                                                                                                                                                                                                                                                                                                                                                                                                                                                                                                                                                                                                                                                                                                                                                                                                                                                                                                                                                                                                                                                                                                                                                                                                                                                                                                                                                                                                                                                                                                                                                                                                                                                                                                                                                                                                                                                                                                                                                                                                                                                                                                                                                                                                                                                                                                                                                                                                                                                                                                                                                                                                                                                                                                                                                                                                                                                                                                                                                                                                                                                                                                                                                                                                                                                                                                                                                                                                                                                                                                                                                                                                                                                                                                                                                                                                                                                                                                                                                                                                                                                                                                                                                                                                                                                                                                                                                                                                                                                                                                                                                                                                                                                                                                                                                                                                                                                                                                                                                                                                                                                                                                                                                                                                                                                                                                                                                                                                                                                                                                                                                                                                                                                                                                                                                                                                                                                                                                                                                                                                                                                                                                                                                                                                                                                                                                                                                                                                                                                                                                                                                                                                                                                                                                                                                                                                                                                                                                                                                                                                                                                                                                                                                                                                                                                                                                                                                                                                                                                                                                                                                                                                                                                                                                                                                                                                                                                                                                                                                                                                                                                                                                                                                                                                                                                                                                                                                                                                                                                                                                                                                                                                                                                                                                                                                                                                                                                                                                                                                                                                                                                                                                                                                                                                                                                                                                                                                                                                                                                                                                                                                                                                                                                                                                                                                                                                                                                                                                                                                                                                                                                                                                                                                                                                                                                                                                                                                                                                                                                                                                                                                                                                                                                                                                                                                                                                                                                                                                                                                                                                                                                                                                                                                                                                                                                                                                                                                                                                                                                                                                                                                                                                                                                                                                                                                                                                                                                                                                                                                                                                                                                                                                                                                                                                                                                                                                                                                                                                                                                                                                                                                                                                                                                                                                                                                                                                                                                                                                                                                                                                                                                                                                                                                                                                                                                                                                                                                                                                                                                                                                                                                                                                                                                                                                                                                                                                                                                                                                                                                                                                                                                                                                                                                                                                                                                                                                                                                                                                                                                                                                                                                                                                                                                                                                                                                                                                                                                                                                                                                                                                                                                                                                                                                                                                                                                                                                                                                                                                                                                                                                                                                                                                                                                                                                                                                                                                                                                                                                                                                                                                                                                                                                                     |
| TTC30B      | 0.781  | 0.00972 | 243413_at    | tetratricopeptide repeat domain 30B                                                                                                                                                                                                                                                                                                                                                                                                                                                                                                                                                                                                                                                                                                                                                                                                                                                                                                                                                                                                                                                                                                                                                                                                                                                                                                                                                                                                                                                                                                                                                                                                                                                                                                                                                                                                                                                                                                                                                                                                                                                                                                                                                                                                                                                                                                                                                                                                                                                                                                                                                                                                                                                                                                                                                                                                                                                                                                                                                                                                                                                                                                                                                                                                                                                                                                                                                                                                                                                                                                                                                                                                                                                                                                                                                                                                                                                                                                                                                                                                                                                                                                                                                                                                                                                                                                                                                                                                                                                                                                                                                                                                                                                                                                                                                                                                                                                                                                                                                                                                                                                                                                                                                                                                                                                                                                                                                                                                                                                                                                                                                                                                                                                                                                                                                                                                                                                                                                                                                                                                                                                                                                                                                                                                                                                                                                                                                                                                                                                                                                                                                                                                                                                                                                                                                                                                                                                                                                                                                                                                                                                                                                                                                                                                                                                                                                                                                                                                                                                                                                                                                                                                                                                                                                                                                                                                                                                                                                                                                                                                                                                                                                                                                                                                                                                                                                                                                                                                                                                                                                                                                                                                                                                                                                                                                                                                                                                                                                                                                                                                                                                                                                                                                                                                                                                                                                                                                                                                                                                                                                                                                                                                                                                                                                                                                                                                                                                                                                                                                                                                                                                                                                                                                                                                                                                                                                                                                                                                                                                                                                                                                                                                                                                                                                                                                                                                                                                                                                                                                                                                                                                                                                                                                                                                                                                                                                                                                                                                                                                                                                                                                                                                                                                                                                                                                                                                                                                                                                                                                                                                                                                                                                                                                                                                                                                                                                                                                                                                                                                                                                                                                                                                                                                                                                                                                                                                                                                                                                                                                                                                                                                                                                                                                                                                                                                                                                                                                                                                                                                                                                                                                                                                                                                                                                                                                                                                                                                                                                                                                                                                                                                                                                                                                                                                                                                                                                                                                                                                                                                                                                                                                                                                                                                                                                                                                                                                                                                                                                                                                                                                                                                                                                                                                                                                                                                                                                                                                                                                                                                                                                                                                                                                                                                                                                                                                                                                                                                                                                                                                                                                                                                                                                                                                                                                                                                                                                                                                                                                                                                                                                                                                                                                                                                                                                                                                                                                                                                                                                                                                                                                                                                                                                                                                                                                                                                                                                                                                                                                                                                                                                                                                                                                                                                                                                                                                                                                                                                                                                                                                                                                                                                                                                                                                                                                                                                                                                                                                                                                                                                                                                                                                                                                                                                                                                                                                                                                                                                                                                                                                                                                                                                                                                                                                                                                                                                                                                                                                                                                                                                                                                                                                                                                                                                                                                                                                                                                                                                                                                                                                                                                                                                                                                                                                                                                                                                                                                                                                                                                                                                                                                                                                                                                                                                                                                                                           |
| PGK1        | 0.901  | 0.00972 | 200738_s_at  | uncharacterized LOC100652805 /// uncharacterized LOC100653302 /// phosphoglycerate kinase 1                                                                                                                                                                                                                                                                                                                                                                                                                                                                                                                                                                                                                                                                                                                                                                                                                                                                                                                                                                                                                                                                                                                                                                                                                                                                                                                                                                                                                                                                                                                                                                                                                                                                                                                                                                                                                                                                                                                                                                                                                                                                                                                                                                                                                                                                                                                                                                                                                                                                                                                                                                                                                                                                                                                                                                                                                                                                                                                                                                                                                                                                                                                                                                                                                                                                                                                                                                                                                                                                                                                                                                                                                                                                                                                                                                                                                                                                                                                                                                                                                                                                                                                                                                                                                                                                                                                                                                                                                                                                                                                                                                                                                                                                                                                                                                                                                                                                                                                                                                                                                                                                                                                                                                                                                                                                                                                                                                                                                                                                                                                                                                                                                                                                                                                                                                                                                                                                                                                                                                                                                                                                                                                                                                                                                                                                                                                                                                                                                                                                                                                                                                                                                                                                                                                                                                                                                                                                                                                                                                                                                                                                                                                                                                                                                                                                                                                                                                                                                                                                                                                                                                                                                                                                                                                                                                                                                                                                                                                                                                                                                                                                                                                                                                                                                                                                                                                                                                                                                                                                                                                                                                                                                                                                                                                                                                                                                                                                                                                                                                                                                                                                                                                                                                                                                                                                                                                                                                                                                                                                                                                                                                                                                                                                                                                                                                                                                                                                                                                                                                                                                                                                                                                                                                                                                                                                                                                                                                                                                                                                                                                                                                                                                                                                                                                                                                                                                                                                                                                                                                                                                                                                                                                                                                                                                                                                                                                                                                                                                                                                                                                                                                                                                                                                                                                                                                                                                                                                                                                                                                                                                                                                                                                                                                                                                                                                                                                                                                                                                                                                                                                                                                                                                                                                                                                                                                                                                                                                                                                                                                                                                                                                                                                                                                                                                                                                                                                                                                                                                                                                                                                                                                                                                                                                                                                                                                                                                                                                                                                                                                                                                                                                                                                                                                                                                                                                                                                                                                                                                                                                                                                                                                                                                                                                                                                                                                                                                                                                                                                                                                                                                                                                                                                                                                                                                                                                                                                                                                                                                                                                                                                                                                                                                                                                                                                                                                                                                                                                                                                                                                                                                                                                                                                                                                                                                                                                                                                                                                                                                                                                                                                                                                                                                                                                                                                                                                                                                                                                                                                                                                                                                                                                                                                                                                                                                                                                                                                                                                                                                                                                                                                                                                                                                                                                                                                                                                                                                                                                                                                                                                                                                                                                                                                                                                                                                                                                                                                                                                                                                                                                                                                                                                                                                                                                                                                                                                                                                                                                                                                                                                                                                                                                                                                                                                                                                                                                                                                                                                                                                                                                                                                                                                                                                                                                                                                                                                                                                                                                                                                                                                                                                                                                                                                                                                                                                                                                                                                                                                                                                                                                                                                                                                                                                                                                                   |
| AKIP1       | 1.059  | 0.00972 | 219953_s_at  | A kinase (PRKA) interacting protein 1                                                                                                                                                                                                                                                                                                                                                                                                                                                                                                                                                                                                                                                                                                                                                                                                                                                                                                                                                                                                                                                                                                                                                                                                                                                                                                                                                                                                                                                                                                                                                                                                                                                                                                                                                                                                                                                                                                                                                                                                                                                                                                                                                                                                                                                                                                                                                                                                                                                                                                                                                                                                                                                                                                                                                                                                                                                                                                                                                                                                                                                                                                                                                                                                                                                                                                                                                                                                                                                                                                                                                                                                                                                                                                                                                                                                                                                                                                                                                                                                                                                                                                                                                                                                                                                                                                                                                                                                                                                                                                                                                                                                                                                                                                                                                                                                                                                                                                                                                                                                                                                                                                                                                                                                                                                                                                                                                                                                                                                                                                                                                                                                                                                                                                                                                                                                                                                                                                                                                                                                                                                                                                                                                                                                                                                                                                                                                                                                                                                                                                                                                                                                                                                                                                                                                                                                                                                                                                                                                                                                                                                                                                                                                                                                                                                                                                                                                                                                                                                                                                                                                                                                                                                                                                                                                                                                                                                                                                                                                                                                                                                                                                                                                                                                                                                                                                                                                                                                                                                                                                                                                                                                                                                                                                                                                                                                                                                                                                                                                                                                                                                                                                                                                                                                                                                                                                                                                                                                                                                                                                                                                                                                                                                                                                                                                                                                                                                                                                                                                                                                                                                                                                                                                                                                                                                                                                                                                                                                                                                                                                                                                                                                                                                                                                                                                                                                                                                                                                                                                                                                                                                                                                                                                                                                                                                                                                                                                                                                                                                                                                                                                                                                                                                                                                                                                                                                                                                                                                                                                                                                                                                                                                                                                                                                                                                                                                                                                                                                                                                                                                                                                                                                                                                                                                                                                                                                                                                                                                                                                                                                                                                                                                                                                                                                                                                                                                                                                                                                                                                                                                                                                                                                                                                                                                                                                                                                                                                                                                                                                                                                                                                                                                                                                                                                                                                                                                                                                                                                                                                                                                                                                                                                                                                                                                                                                                                                                                                                                                                                                                                                                                                                                                                                                                                                                                                                                                                                                                                                                                                                                                                                                                                                                                                                                                                                                                                                                                                                                                                                                                                                                                                                                                                                                                                                                                                                                                                                                                                                                                                                                                                                                                                                                                                                                                                                                                                                                                                                                                                                                                                                                                                                                                                                                                                                                                                                                                                                                                                                                                                                                                                                                                                                                                                                                                                                                                                                                                                                                                                                                                                                                                                                                                                                                                                                                                                                                                                                                                                                                                                                                                                                                                                                                                                                                                                                                                                                                                                                                                                                                                                                                                                                                                                                                                                                                                                                                                                                                                                                                                                                                                                                                                                                                                                                                                                                                                                                                                                                                                                                                                                                                                                                                                                                                                                                                                                                                                                                                                                                                                                                                                                                                                                                                                                                                                                                         |
| ANK2        | -3.238 | 0.00978 | 202920_at    | ankyrin 2, neuronal                                                                                                                                                                                                                                                                                                                                                                                                                                                                                                                                                                                                                                                                                                                                                                                                                                                                                                                                                                                                                                                                                                                                                                                                                                                                                                                                                                                                                                                                                                                                                                                                                                                                                                                                                                                                                                                                                                                                                                                                                                                                                                                                                                                                                                                                                                                                                                                                                                                                                                                                                                                                                                                                                                                                                                                                                                                                                                                                                                                                                                                                                                                                                                                                                                                                                                                                                                                                                                                                                                                                                                                                                                                                                                                                                                                                                                                                                                                                                                                                                                                                                                                                                                                                                                                                                                                                                                                                                                                                                                                                                                                                                                                                                                                                                                                                                                                                                                                                                                                                                                                                                                                                                                                                                                                                                                                                                                                                                                                                                                                                                                                                                                                                                                                                                                                                                                                                                                                                                                                                                                                                                                                                                                                                                                                                                                                                                                                                                                                                                                                                                                                                                                                                                                                                                                                                                                                                                                                                                                                                                                                                                                                                                                                                                                                                                                                                                                                                                                                                                                                                                                                                                                                                                                                                                                                                                                                                                                                                                                                                                                                                                                                                                                                                                                                                                                                                                                                                                                                                                                                                                                                                                                                                                                                                                                                                                                                                                                                                                                                                                                                                                                                                                                                                                                                                                                                                                                                                                                                                                                                                                                                                                                                                                                                                                                                                                                                                                                                                                                                                                                                                                                                                                                                                                                                                                                                                                                                                                                                                                                                                                                                                                                                                                                                                                                                                                                                                                                                                                                                                                                                                                                                                                                                                                                                                                                                                                                                                                                                                                                                                                                                                                                                                                                                                                                                                                                                                                                                                                                                                                                                                                                                                                                                                                                                                                                                                                                                                                                                                                                                                                                                                                                                                                                                                                                                                                                                                                                                                                                                                                                                                                                                                                                                                                                                                                                                                                                                                                                                                                                                                                                                                                                                                                                                                                                                                                                                                                                                                                                                                                                                                                                                                                                                                                                                                                                                                                                                                                                                                                                                                                                                                                                                                                                                                                                                                                                                                                                                                                                                                                                                                                                                                                                                                                                                                                                                                                                                                                                                                                                                                                                                                                                                                                                                                                                                                                                                                                                                                                                                                                                                                                                                                                                                                                                                                                                                                                                                                                                                                                                                                                                                                                                                                                                                                                                                                                                                                                                                                                                                                                                                                                                                                                                                                                                                                                                                                                                                                                                                                                                                                                                                                                                                                                                                                                                                                                                                                                                                                                                                                                                                                                                                                                                                                                                                                                                                                                                                                                                                                                                                                                                                                                                                                                                                                                                                                                                                                                                                                                                                                                                                                                                                                                                                                                                                                                                                                                                                                                                                                                                                                                                                                                                                                                                                                                                                                                                                                                                                                                                                                                                                                                                                                                                                                                                                                                                                                                                                                                                                                                                                                                                                                                                                                                                                                                           |
| CDK11B      | -0.561 | 0.00978 | 212401_s_at  | cyclin-dependent kinase 11A /// cyclin-dependent kinase 11B                                                                                                                                                                                                                                                                                                                                                                                                                                                                                                                                                                                                                                                                                                                                                                                                                                                                                                                                                                                                                                                                                                                                                                                                                                                                                                                                                                                                                                                                                                                                                                                                                                                                                                                                                                                                                                                                                                                                                                                                                                                                                                                                                                                                                                                                                                                                                                                                                                                                                                                                                                                                                                                                                                                                                                                                                                                                                                                                                                                                                                                                                                                                                                                                                                                                                                                                                                                                                                                                                                                                                                                                                                                                                                                                                                                                                                                                                                                                                                                                                                                                                                                                                                                                                                                                                                                                                                                                                                                                                                                                                                                                                                                                                                                                                                                                                                                                                                                                                                                                                                                                                                                                                                                                                                                                                                                                                                                                                                                                                                                                                                                                                                                                                                                                                                                                                                                                                                                                                                                                                                                                                                                                                                                                                                                                                                                                                                                                                                                                                                                                                                                                                                                                                                                                                                                                                                                                                                                                                                                                                                                                                                                                                                                                                                                                                                                                                                                                                                                                                                                                                                                                                                                                                                                                                                                                                                                                                                                                                                                                                                                                                                                                                                                                                                                                                                                                                                                                                                                                                                                                                                                                                                                                                                                                                                                                                                                                                                                                                                                                                                                                                                                                                                                                                                                                                                                                                                                                                                                                                                                                                                                                                                                                                                                                                                                                                                                                                                                                                                                                                                                                                                                                                                                                                                                                                                                                                                                                                                                                                                                                                                                                                                                                                                                                                                                                                                                                                                                                                                                                                                                                                                                                                                                                                                                                                                                                                                                                                                                                                                                                                                                                                                                                                                                                                                                                                                                                                                                                                                                                                                                                                                                                                                                                                                                                                                                                                                                                                                                                                                                                                                                                                                                                                                                                                                                                                                                                                                                                                                                                                                                                                                                                                                                                                                                                                                                                                                                                                                                                                                                                                                                                                                                                                                                                                                                                                                                                                                                                                                                                                                                                                                                                                                                                                                                                                                                                                                                                                                                                                                                                                                                                                                                                                                                                                                                                                                                                                                                                                                                                                                                                                                                                                                                                                                                                                                                                                                                                                                                                                                                                                                                                                                                                                                                                                                                                                                                                                                                                                                                                                                                                                                                                                                                                                                                                                                                                                                                                                                                                                                                                                                                                                                                                                                                                                                                                                                                                                                                                                                                                                                                                                                                                                                                                                                                                                                                                                                                                                                                                                                                                                                                                                                                                                                                                                                                                                                                                                                                                                                                                                                                                                                                                                                                                                                                                                                                                                                                                                                                                                                                                                                                                                                                                                                                                                                                                                                                                                                                                                                                                                                                                                                                                                                                                                                                                                                                                                                                                                                                                                                                                                                                                                                                                                                                                                                                                                                                                                                                                                                                                                                                                                                                                                                                                                                                                                                                                                                                                                                                                                                                                                                                                                                                                                                                   |
| ZNF138      | 0.909  | 0.00978 | 244743_x_at  | zinc finger protein 138                                                                                                                                                                                                                                                                                                                                                                                                                                                                                                                                                                                                                                                                                                                                                                                                                                                                                                                                                                                                                                                                                                                                                                                                                                                                                                                                                                                                                                                                                                                                                                                                                                                                                                                                                                                                                                                                                                                                                                                                                                                                                                                                                                                                                                                                                                                                                                                                                                                                                                                                                                                                                                                                                                                                                                                                                                                                                                                                                                                                                                                                                                                                                                                                                                                                                                                                                                                                                                                                                                                                                                                                                                                                                                                                                                                                                                                                                                                                                                                                                                                                                                                                                                                                                                                                                                                                                                                                                                                                                                                                                                                                                                                                                                                                                                                                                                                                                                                                                                                                                                                                                                                                                                                                                                                                                                                                                                                                                                                                                                                                                                                                                                                                                                                                                                                                                                                                                                                                                                                                                                                                                                                                                                                                                                                                                                                                                                                                                                                                                                                                                                                                                                                                                                                                                                                                                                                                                                                                                                                                                                                                                                                                                                                                                                                                                                                                                                                                                                                                                                                                                                                                                                                                                                                                                                                                                                                                                                                                                                                                                                                                                                                                                                                                                                                                                                                                                                                                                                                                                                                                                                                                                                                                                                                                                                                                                                                                                                                                                                                                                                                                                                                                                                                                                                                                                                                                                                                                                                                                                                                                                                                                                                                                                                                                                                                                                                                                                                                                                                                                                                                                                                                                                                                                                                                                                                                                                                                                                                                                                                                                                                                                                                                                                                                                                                                                                                                                                                                                                                                                                                                                                                                                                                                                                                                                                                                                                                                                                                                                                                                                                                                                                                                                                                                                                                                                                                                                                                                                                                                                                                                                                                                                                                                                                                                                                                                                                                                                                                                                                                                                                                                                                                                                                                                                                                                                                                                                                                                                                                                                                                                                                                                                                                                                                                                                                                                                                                                                                                                                                                                                                                                                                                                                                                                                                                                                                                                                                                                                                                                                                                                                                                                                                                                                                                                                                                                                                                                                                                                                                                                                                                                                                                                                                                                                                                                                                                                                                                                                                                                                                                                                                                                                                                                                                                                                                                                                                                                                                                                                                                                                                                                                                                                                                                                                                                                                                                                                                                                                                                                                                                                                                                                                                                                                                                                                                                                                                                                                                                                                                                                                                                                                                                                                                                                                                                                                                                                                                                                                                                                                                                                                                                                                                                                                                                                                                                                                                                                                                                                                                                                                                                                                                                                                                                                                                                                                                                                                                                                                                                                                                                                                                                                                                                                                                                                                                                                                                                                                                                                                                                                                                                                                                                                                                                                                                                                                                                                                                                                                                                                                                                                                                                                                                                                                                                                                                                                                                                                                                                                                                                                                                                                                                                                                                                                                                                                                                                                                                                                                                                                                                                                                                                                                                                                                                                                                                                                                                                                                                                                                                                                                                                                                                                                                                                                                                       |
| FAM149B1    | 1.242  | 0.00979 | 213896_x_at  | family with sequence similarity 149, member B1                                                                                                                                                                                                                                                                                                                                                                                                                                                                                                                                                                                                                                                                                                                                                                                                                                                                                                                                                                                                                                                                                                                                                                                                                                                                                                                                                                                                                                                                                                                                                                                                                                                                                                                                                                                                                                                                                                                                                                                                                                                                                                                                                                                                                                                                                                                                                                                                                                                                                                                                                                                                                                                                                                                                                                                                                                                                                                                                                                                                                                                                                                                                                                                                                                                                                                                                                                                                                                                                                                                                                                                                                                                                                                                                                                                                                                                                                                                                                                                                                                                                                                                                                                                                                                                                                                                                                                                                                                                                                                                                                                                                                                                                                                                                                                                                                                                                                                                                                                                                                                                                                                                                                                                                                                                                                                                                                                                                                                                                                                                                                                                                                                                                                                                                                                                                                                                                                                                                                                                                                                                                                                                                                                                                                                                                                                                                                                                                                                                                                                                                                                                                                                                                                                                                                                                                                                                                                                                                                                                                                                                                                                                                                                                                                                                                                                                                                                                                                                                                                                                                                                                                                                                                                                                                                                                                                                                                                                                                                                                                                                                                                                                                                                                                                                                                                                                                                                                                                                                                                                                                                                                                                                                                                                                                                                                                                                                                                                                                                                                                                                                                                                                                                                                                                                                                                                                                                                                                                                                                                                                                                                                                                                                                                                                                                                                                                                                                                                                                                                                                                                                                                                                                                                                                                                                                                                                                                                                                                                                                                                                                                                                                                                                                                                                                                                                                                                                                                                                                                                                                                                                                                                                                                                                                                                                                                                                                                                                                                                                                                                                                                                                                                                                                                                                                                                                                                                                                                                                                                                                                                                                                                                                                                                                                                                                                                                                                                                                                                                                                                                                                                                                                                                                                                                                                                                                                                                                                                                                                                                                                                                                                                                                                                                                                                                                                                                                                                                                                                                                                                                                                                                                                                                                                                                                                                                                                                                                                                                                                                                                                                                                                                                                                                                                                                                                                                                                                                                                                                                                                                                                                                                                                                                                                                                                                                                                                                                                                                                                                                                                                                                                                                                                                                                                                                                                                                                                                                                                                                                                                                                                                                                                                                                                                                                                                                                                                                                                                                                                                                                                                                                                                                                                                                                                                                                                                                                                                                                                                                                                                                                                                                                                                                                                                                                                                                                                                                                                                                                                                                                                                                                                                                                                                                                                                                                                                                                                                                                                                                                                                                                                                                                                                                                                                                                                                                                                                                                                                                                                                                                                                                                                                                                                                                                                                                                                                                                                                                                                                                                                                                                                                                                                                                                                                                                                                                                                                                                                                                                                                                                                                                                                                                                                                                                                                                                                                                                                                                                                                                                                                                                                                                                                                                                                                                                                                                                                                                                                                                                                                                                                                                                                                                                                                                                                                                                                                                                                                                                                                                                                                                                                                                                                                                                                                                                                                |
| ADAMTS9-AS1 | -2.268 | 0.00983 | 1556364_at   | ADAMTS9 antisense RNA 2 (non-protein coding)                                                                                                                                                                                                                                                                                                                                                                                                                                                                                                                                                                                                                                                                                                                                                                                                                                                                                                                                                                                                                                                                                                                                                                                                                                                                                                                                                                                                                                                                                                                                                                                                                                                                                                                                                                                                                                                                                                                                                                                                                                                                                                                                                                                                                                                                                                                                                                                                                                                                                                                                                                                                                                                                                                                                                                                                                                                                                                                                                                                                                                                                                                                                                                                                                                                                                                                                                                                                                                                                                                                                                                                                                                                                                                                                                                                                                                                                                                                                                                                                                                                                                                                                                                                                                                                                                                                                                                                                                                                                                                                                                                                                                                                                                                                                                                                                                                                                                                                                                                                                                                                                                                                                                                                                                                                                                                                                                                                                                                                                                                                                                                                                                                                                                                                                                                                                                                                                                                                                                                                                                                                                                                                                                                                                                                                                                                                                                                                                                                                                                                                                                                                                                                                                                                                                                                                                                                                                                                                                                                                                                                                                                                                                                                                                                                                                                                                                                                                                                                                                                                                                                                                                                                                                                                                                                                                                                                                                                                                                                                                                                                                                                                                                                                                                                                                                                                                                                                                                                                                                                                                                                                                                                                                                                                                                                                                                                                                                                                                                                                                                                                                                                                                                                                                                                                                                                                                                                                                                                                                                                                                                                                                                                                                                                                                                                                                                                                                                                                                                                                                                                                                                                                                                                                                                                                                                                                                                                                                                                                                                                                                                                                                                                                                                                                                                                                                                                                                                                                                                                                                                                                                                                                                                                                                                                                                                                                                                                                                                                                                                                                                                                                                                                                                                                                                                                                                                                                                                                                                                                                                                                                                                                                                                                                                                                                                                                                                                                                                                                                                                                                                                                                                                                                                                                                                                                                                                                                                                                                                                                                                                                                                                                                                                                                                                                                                                                                                                                                                                                                                                                                                                                                                                                                                                                                                                                                                                                                                                                                                                                                                                                                                                                                                                                                                                                                                                                                                                                                                                                                                                                                                                                                                                                                                                                                                                                                                                                                                                                                                                                                                                                                                                                                                                                                                                                                                                                                                                                                                                                                                                                                                                                                                                                                                                                                                                                                                                                                                                                                                                                                                                                                                                                                                                                                                                                                                                                                                                                                                                                                                                                                                                                                                                                                                                                                                                                                                                                                                                                                                                                                                                                                                                                                                                                                                                                                                                                                                                                                                                                                                                                                                                                                                                                                                                                                                                                                                                                                                                                                                                                                                                                                                                                                                                                                                                                                                                                                                                                                                                                                                                                                                                                                                                                                                                                                                                                                                                                                                                                                                                                                                                                                                                                                                                                                                                                                                                                                                                                                                                                                                                                                                                                                                                                                                                                                                                                                                                                                                                                                                                                                                                                                                                                                                                                                                                                                                                                                                                                                                                                                                                                                                                                                                                                                                                                                                                  |
| MKL2        | -1.494 | 0.00983 | 218259_at    | MKL/myocardin-like 2                                                                                                                                                                                                                                                                                                                                                                                                                                                                                                                                                                                                                                                                                                                                                                                                                                                                                                                                                                                                                                                                                                                                                                                                                                                                                                                                                                                                                                                                                                                                                                                                                                                                                                                                                                                                                                                                                                                                                                                                                                                                                                                                                                                                                                                                                                                                                                                                                                                                                                                                                                                                                                                                                                                                                                                                                                                                                                                                                                                                                                                                                                                                                                                                                                                                                                                                                                                                                                                                                                                                                                                                                                                                                                                                                                                                                                                                                                                                                                                                                                                                                                                                                                                                                                                                                                                                                                                                                                                                                                                                                                                                                                                                                                                                                                                                                                                                                                                                                                                                                                                                                                                                                                                                                                                                                                                                                                                                                                                                                                                                                                                                                                                                                                                                                                                                                                                                                                                                                                                                                                                                                                                                                                                                                                                                                                                                                                                                                                                                                                                                                                                                                                                                                                                                                                                                                                                                                                                                                                                                                                                                                                                                                                                                                                                                                                                                                                                                                                                                                                                                                                                                                                                                                                                                                                                                                                                                                                                                                                                                                                                                                                                                                                                                                                                                                                                                                                                                                                                                                                                                                                                                                                                                                                                                                                                                                                                                                                                                                                                                                                                                                                                                                                                                                                                                                                                                                                                                                                                                                                                                                                                                                                                                                                                                                                                                                                                                                                                                                                                                                                                                                                                                                                                                                                                                                                                                                                                                                                                                                                                                                                                                                                                                                                                                                                                                                                                                                                                                                                                                                                                                                                                                                                                                                                                                                                                                                                                                                                                                                                                                                                                                                                                                                                                                                                                                                                                                                                                                                                                                                                                                                                                                                                                                                                                                                                                                                                                                                                                                                                                                                                                                                                                                                                                                                                                                                                                                                                                                                                                                                                                                                                                                                                                                                                                                                                                                                                                                                                                                                                                                                                                                                                                                                                                                                                                                                                                                                                                                                                                                                                                                                                                                                                                                                                                                                                                                                                                                                                                                                                                                                                                                                                                                                                                                                                                                                                                                                                                                                                                                                                                                                                                                                                                                                                                                                                                                                                                                                                                                                                                                                                                                                                                                                                                                                                                                                                                                                                                                                                                                                                                                                                                                                                                                                                                                                                                                                                                                                                                                                                                                                                                                                                                                                                                                                                                                                                                                                                                                                                                                                                                                                                                                                                                                                                                                                                                                                                                                                                                                                                                                                                                                                                                                                                                                                                                                                                                                                                                                                                                                                                                                                                                                                                                                                                                                                                                                                                                                                                                                                                                                                                                                                                                                                                                                                                                                                                                                                                                                                                                                                                                                                                                                                                                                                                                                                                                                                                                                                                                                                                                                                                                                                                                                                                                                                                                                                                                                                                                                                                                                                                                                                                                                                                                                                                                                                                                                                                                                                                                                                                                                                                                                                                                                                                                                                          |
| NMT1        | 0.926  | 0.00983 | 201157_s_at  | N-myristoyltransferase 1                                                                                                                                                                                                                                                                                                                                                                                                                                                                                                                                                                                                                                                                                                                                                                                                                                                                                                                                                                                                                                                                                                                                                                                                                                                                                                                                                                                                                                                                                                                                                                                                                                                                                                                                                                                                                                                                                                                                                                                                                                                                                                                                                                                                                                                                                                                                                                                                                                                                                                                                                                                                                                                                                                                                                                                                                                                                                                                                                                                                                                                                                                                                                                                                                                                                                                                                                                                                                                                                                                                                                                                                                                                                                                                                                                                                                                                                                                                                                                                                                                                                                                                                                                                                                                                                                                                                                                                                                                                                                                                                                                                                                                                                                                                                                                                                                                                                                                                                                                                                                                                                                                                                                                                                                                                                                                                                                                                                                                                                                                                                                                                                                                                                                                                                                                                                                                                                                                                                                                                                                                                                                                                                                                                                                                                                                                                                                                                                                                                                                                                                                                                                                                                                                                                                                                                                                                                                                                                                                                                                                                                                                                                                                                                                                                                                                                                                                                                                                                                                                                                                                                                                                                                                                                                                                                                                                                                                                                                                                                                                                                                                                                                                                                                                                                                                                                                                                                                                                                                                                                                                                                                                                                                                                                                                                                                                                                                                                                                                                                                                                                                                                                                                                                                                                                                                                                                                                                                                                                                                                                                                                                                                                                                                                                                                                                                                                                                                                                                                                                                                                                                                                                                                                                                                                                                                                                                                                                                                                                                                                                                                                                                                                                                                                                                                                                                                                                                                                                                                                                                                                                                                                                                                                                                                                                                                                                                                                                                                                                                                                                                                                                                                                                                                                                                                                                                                                                                                                                                                                                                                                                                                                                                                                                                                                                                                                                                                                                                                                                                                                                                                                                                                                                                                                                                                                                                                                                                                                                                                                                                                                                                                                                                                                                                                                                                                                                                                                                                                                                                                                                                                                                                                                                                                                                                                                                                                                                                                                                                                                                                                                                                                                                                                                                                                                                                                                                                                                                                                                                                                                                                                                                                                                                                                                                                                                                                                                                                                                                                                                                                                                                                                                                                                                                                                                                                                                                                                                                                                                                                                                                                                                                                                                                                                                                                                                                                                                                                                                                                                                                                                                                                                                                                                                                                                                                                                                                                                                                                                                                                                                                                                                                                                                                                                                                                                                                                                                                                                                                                                                                                                                                                                                                                                                                                                                                                                                                                                                                                                                                                                                                                                                                                                                                                                                                                                                                                                                                                                                                                                                                                                                                                                                                                                                                                                                                                                                                                                                                                                                                                                                                                                                                                                                                                                                                                                                                                                                                                                                                                                                                                                                                                                                                                                                                                                                                                                                                                                                                                                                                                                                                                                                                                                                                                                                                                                                                                                                                                                                                                                                                                                                                                                                                                                                                                                                                                                                                                                                                                                                                                                                                                                                                                                                                                                                                                                                      |
| SSR3        | 1.262  | 0.00983 | 222411_s_at  | signal sequence receptor, gamma (translocon-associated protein gamma)                                                                                                                                                                                                                                                                                                                                                                                                                                                                                                                                                                                                                                                                                                                                                                                                                                                                                                                                                                                                                                                                                                                                                                                                                                                                                                                                                                                                                                                                                                                                                                                                                                                                                                                                                                                                                                                                                                                                                                                                                                                                                                                                                                                                                                                                                                                                                                                                                                                                                                                                                                                                                                                                                                                                                                                                                                                                                                                                                                                                                                                                                                                                                                                                                                                                                                                                                                                                                                                                                                                                                                                                                                                                                                                                                                                                                                                                                                                                                                                                                                                                                                                                                                                                                                                                                                                                                                                                                                                                                                                                                                                                                                                                                                                                                                                                                                                                                                                                                                                                                                                                                                                                                                                                                                                                                                                                                                                                                                                                                                                                                                                                                                                                                                                                                                                                                                                                                                                                                                                                                                                                                                                                                                                                                                                                                                                                                                                                                                                                                                                                                                                                                                                                                                                                                                                                                                                                                                                                                                                                                                                                                                                                                                                                                                                                                                                                                                                                                                                                                                                                                                                                                                                                                                                                                                                                                                                                                                                                                                                                                                                                                                                                                                                                                                                                                                                                                                                                                                                                                                                                                                                                                                                                                                                                                                                                                                                                                                                                                                                                                                                                                                                                                                                                                                                                                                                                                                                                                                                                                                                                                                                                                                                                                                                                                                                                                                                                                                                                                                                                                                                                                                                                                                                                                                                                                                                                                                                                                                                                                                                                                                                                                                                                                                                                                                                                                                                                                                                                                                                                                                                                                                                                                                                                                                                                                                                                                                                                                                                                                                                                                                                                                                                                                                                                                                                                                                                                                                                                                                                                                                                                                                                                                                                                                                                                                                                                                                                                                                                                                                                                                                                                                                                                                                                                                                                                                                                                                                                                                                                                                                                                                                                                                                                                                                                                                                                                                                                                                                                                                                                                                                                                                                                                                                                                                                                                                                                                                                                                                                                                                                                                                                                                                                                                                                                                                                                                                                                                                                                                                                                                                                                                                                                                                                                                                                                                                                                                                                                                                                                                                                                                                                                                                                                                                                                                                                                                                                                                                                                                                                                                                                                                                                                                                                                                                                                                                                                                                                                                                                                                                                                                                                                                                                                                                                                                                                                                                                                                                                                                                                                                                                                                                                                                                                                                                                                                                                                                                                                                                                                                                                                                                                                                                                                                                                                                                                                                                                                                                                                                                                                                                                                                                                                                                                                                                                                                                                                                                                                                                                                                                                                                                                                                                                                                                                                                                                                                                                                                                                                                                                                                                                                                                                                                                                                                                                                                                                                                                                                                                                                                                                                                                                                                                                                                                                                                                                                                                                                                                                                                                                                                                                                                                                                                                                                                                                                                                                                                                                                                                                                                                                                                                                                                                                                                                                                                                                                                                                                                                                                                                                                                                                                                                                                                                                         |
| AKT3        | -1.656 | 0.00991 | 212607_at    | v-akt murine thymoma viral oncogene homolog 3 (protein kinase B, gamma)                                                                                                                                                                                                                                                                                                                                                                                                                                                                                                                                                                                                                                                                                                                                                                                                                                                                                                                                                                                                                                                                                                                                                                                                                                                                                                                                                                                                                                                                                                                                                                                                                                                                                                                                                                                                                                                                                                                                                                                                                                                                                                                                                                                                                                                                                                                                                                                                                                                                                                                                                                                                                                                                                                                                                                                                                                                                                                                                                                                                                                                                                                                                                                                                                                                                                                                                                                                                                                                                                                                                                                                                                                                                                                                                                                                                                                                                                                                                                                                                                                                                                                                                                                                                                                                                                                                                                                                                                                                                                                                                                                                                                                                                                                                                                                                                                                                                                                                                                                                                                                                                                                                                                                                                                                                                                                                                                                                                                                                                                                                                                                                                                                                                                                                                                                                                                                                                                                                                                                                                                                                                                                                                                                                                                                                                                                                                                                                                                                                                                                                                                                                                                                                                                                                                                                                                                                                                                                                                                                                                                                                                                                                                                                                                                                                                                                                                                                                                                                                                                                                                                                                                                                                                                                                                                                                                                                                                                                                                                                                                                                                                                                                                                                                                                                                                                                                                                                                                                                                                                                                                                                                                                                                                                                                                                                                                                                                                                                                                                                                                                                                                                                                                                                                                                                                                                                                                                                                                                                                                                                                                                                                                                                                                                                                                                                                                                                                                                                                                                                                                                                                                                                                                                                                                                                                                                                                                                                                                                                                                                                                                                                                                                                                                                                                                                                                                                                                                                                                                                                                                                                                                                                                                                                                                                                                                                                                                                                                                                                                                                                                                                                                                                                                                                                                                                                                                                                                                                                                                                                                                                                                                                                                                                                                                                                                                                                                                                                                                                                                                                                                                                                                                                                                                                                                                                                                                                                                                                                                                                                                                                                                                                                                                                                                                                                                                                                                                                                                                                                                                                                                                                                                                                                                                                                                                                                                                                                                                                                                                                                                                                                                                                                                                                                                                                                                                                                                                                                                                                                                                                                                                                                                                                                                                                                                                                                                                                                                                                                                                                                                                                                                                                                                                                                                                                                                                                                                                                                                                                                                                                                                                                                                                                                                                                                                                                                                                                                                                                                                                                                                                                                                                                                                                                                                                                                                                                                                                                                                                                                                                                                                                                                                                                                                                                                                                                                                                                                                                                                                                                                                                                                                                                                                                                                                                                                                                                                                                                                                                                                                                                                                                                                                                                                                                                                                                                                                                                                                                                                                                                                                                                                                                                                                                                                                                                                                                                                                                                                                                                                                                                                                                                                                                                                                                                                                                                                                                                                                                                                                                                                                                                                                                                                                                                                                                                                                                                                                                                                                                                                                                                                                                                                                                                                                                                                                                                                                                                                                                                                                                                                                                                                                                                                                                                                                                                                                                                                                                                                                                                                                                                                                                                                                                                                                                                                       |
| PTGES       | 2.777  | 0.00991 | 210367_s_at  | prostaglandin E synthase                                                                                                                                                                                                                                                                                                                                                                                                                                                                                                                                                                                                                                                                                                                                                                                                                                                                                                                                                                                                                                                                                                                                                                                                                                                                                                                                                                                                                                                                                                                                                                                                                                                                                                                                                                                                                                                                                                                                                                                                                                                                                                                                                                                                                                                                                                                                                                                                                                                                                                                                                                                                                                                                                                                                                                                                                                                                                                                                                                                                                                                                                                                                                                                                                                                                                                                                                                                                                                                                                                                                                                                                                                                                                                                                                                                                                                                                                                                                                                                                                                                                                                                                                                                                                                                                                                                                                                                                                                                                                                                                                                                                                                                                                                                                                                                                                                                                                                                                                                                                                                                                                                                                                                                                                                                                                                                                                                                                                                                                                                                                                                                                                                                                                                                                                                                                                                                                                                                                                                                                                                                                                                                                                                                                                                                                                                                                                                                                                                                                                                                                                                                                                                                                                                                                                                                                                                                                                                                                                                                                                                                                                                                                                                                                                                                                                                                                                                                                                                                                                                                                                                                                                                                                                                                                                                                                                                                                                                                                                                                                                                                                                                                                                                                                                                                                                                                                                                                                                                                                                                                                                                                                                                                                                                                                                                                                                                                                                                                                                                                                                                                                                                                                                                                                                                                                                                                                                                                                                                                                                                                                                                                                                                                                                                                                                                                                                                                                                                                                                                                                                                                                                                                                                                                                                                                                                                                                                                                                                                                                                                                                                                                                                                                                                                                                                                                                                                                                                                                                                                                                                                                                                                                                                                                                                                                                                                                                                                                                                                                                                                                                                                                                                                                                                                                                                                                                                                                                                                                                                                                                                                                                                                                                                                                                                                                                                                                                                                                                                                                                                                                                                                                                                                                                                                                                                                                                                                                                                                                                                                                                                                                                                                                                                                                                                                                                                                                                                                                                                                                                                                                                                                                                                                                                                                                                                                                                                                                                                                                                                                                                                                                                                                                                                                                                                                                                                                                                                                                                                                                                                                                                                                                                                                                                                                                                                                                                                                                                                                                                                                                                                                                                                                                                                                                                                                                                                                                                                                                                                                                                                                                                                                                                                                                                                                                                                                                                                                                                                                                                                                                                                                                                                                                                                                                                                                                                                                                                                                                                                                                                                                                                                                                                                                                                                                                                                                                                                                                                                                                                                                                                                                                                                                                                                                                                                                                                                                                                                                                                                                                                                                                                                                                                                                                                                                                                                                                                                                                                                                                                                                                                                                                                                                                                                                                                                                                                                                                                                                                                                                                                                                                                                                                                                                                                                                                                                                                                                                                                                                                                                                                                                                                                                                                                                                                                                                                                                                                                                                                                                                                                                                                                                                                                                                                                                                                                                                                                                                                                                                                                                                                                                                                                                                                                                                                                                                                                                                                                                                                                                                                                                                                                                                                                                                                                                                                                                      |
| ANGPT1      | -3     | 0.00991 | 205609_at    | angiotensinogen 1                                                                                                                                                                                                                                                                                                                                                                                                                                                                                                                                                                                                                                                                                                                                                                                                                                                                                                                                                                                                                                                                                                                                                                                                                                                                                                                                                                                                                                                                                                                                                                                                                                                                                                                                                                                                                                                                                                                                                                                                                                                                                                                                                                                                                                                                                                                                                                                                                                                                                                                                                                                                                                                                                                                                                                                                                                                                                                                                                                                                                                                                                                                                                                                                                                                                                                                                                                                                                                                                                                                                                                                                                                                                                                                                                                                                                                                                                                                                                                                                                                                                                                                                                                                                                                                                                                                                                                                                                                                                                                                                                                                                                                                                                                                                                                                                                                                                                                                                                                                                                                                                                                                                                                                                                                                                                                                                                                                                                                                                                                                                                                                                                                                                                                                                                                                                                                                                                                                                                                                                                                                                                                                                                                                                                                                                                                                                                                                                                                                                                                                                                                                                                                                                                                                                                                                                                                                                                                                                                                                                                                                                                                                                                                                                                                                                                                                                                                                                                                                                                                                                                                                                                                                                                                                                                                                                                                                                                                                                                                                                                                                                                                                                                                                                                                                                                                                                                                                                                                                                                                                                                                                                                                                                                                                                                                                                                                                                                                                                                                                                                                                                                                                                                                                                                                                                                                                                                                                                                                                                                                                                                                                                                                                                                                                                                                                                                                                                                                                                                                                                                                                                                                                                                                                                                                                                                                                                                                                                                                                                                                                                                                                                                                                                                                                                                                                                                                                                                                                                                                                                                                                                                                                                                                                                                                                                                                                                                                                                                                                                                                                                                                                                                                                                                                                                                                                                                                                                                                                                                                                                                                                                                                                                                                                                                                                                                                                                                                                                                                                                                                                                                                                                                                                                                                                                                                                                                                                                                                                                                                                                                                                                                                                                                                                                                                                                                                                                                                                                                                                                                                                                                                                                                                                                                                                                                                                                                                                                                                                                                                                                                                                                                                                                                                                                                                                                                                                                                                                                                                                                                                                                                                                                                                                                                                                                                                                                                                                                                                                                                                                                                                                                                                                                                                                                                                                                                                                                                                                                                                                                                                                                                                                                                                                                                                                                                                                                                                                                                                                                                                                                                                                                                                                                                                                                                                                                                                                                                                                                                                                                                                                                                                                                                                                                                                                                                                                                                                                                                                                                                                                                                                                                                                                                                                                                                                                                                                                                                                                                                                                                                                                                                                                                                                                                                                                                                                                                                                                                                                                                                                                                                                                                                                                                                                                                                                                                                                                                                                                                                                                                                                                                                                                                                                                                                                                                                                                                                                                                                                                                                                                                                                                                                                                                                                                                                                                                                                                                                                                                                                                                                                                                                                                                                                                                                                                                                                                                                                                                                                                                                                                                                                                                                                                                                                                                                                                                                                                                                                                                                                                                                                                                                                                                                                                                                                                                                             |
| DNAJC9      | 1.18   | 0.00997 | 213088_s_at  | DnaJ (Hsp40) homolog, subfamily C, member 9                                                                                                                                                                                                                                                                                                                                                                                                                                                                                                                                                                                                                                                                                                                                                                                                                                                                                                                                                                                                                                                                                                                                                                                                                                                                                                                                                                                                                                                                                                                                                                                                                                                                                                                                                                                                                                                                                                                                                                                                                                                                                                                                                                                                                                                                                                                                                                                                                                                                                                                                                                                                                                                                                                                                                                                                                                                                                                                                                                                                                                                                                                                                                                                                                                                                                                                                                                                                                                                                                                                                                                                                                                                                                                                                                                                                                                                                                                                                                                                                                                                                                                                                                                                                                                                                                                                                                                                                                                                                                                                                                                                                                                                                                                                                                                                                                                                                                                                                                                                                                                                                                                                                                                                                                                                                                                                                                                                                                                                                                                                                                                                                                                                                                                                                                                                                                                                                                                                                                                                                                                                                                                                                                                                                                                                                                                                                                                                                                                                                                                                                                                                                                                                                                                                                                                                                                                                                                                                                                                                                                                                                                                                                                                                                                                                                                                                                                                                                                                                                                                                                                                                                                                                                                                                                                                                                                                                                                                                                                                                                                                                                                                                                                                                                                                                                                                                                                                                                                                                                                                                                                                                                                                                                                                                                                                                                                                                                                                                                                                                                                                                                                                                                                                                                                                                                                                                                                                                                                                                                                                                                                                                                                                                                                                                                                                                                                                                                                                                                                                                                                                                                                                                                                                                                                                                                                                                                                                                                                                                                                                                                                                                                                                                                                                                                                                                                                                                                                                                                                                                                                                                                                                                                                                                                                                                                                                                                                                                                                                                                                                                                                                                                                                                                                                                                                                                                                                                                                                                                                                                                                                                                                                                                                                                                                                                                                                                                                                                                                                                                                                                                                                                                                                                                                                                                                                                                                                                                                                                                                                                                                                                                                                                                                                                                                                                                                                                                                                                                                                                                                                                                                                                                                                                                                                                                                                                                                                                                                                                                                                                                                                                                                                                                                                                                                                                                                                                                                                                                                                                                                                                                                                                                                                                                                                                                                                                                                                                                                                                                                                                                                                                                                                                                                                                                                                                                                                                                                                                                                                                                                                                                                                                                                                                                                                                                                                                                                                                                                                                                                                                                                                                                                                                                                                                                                                                                                                                                                                                                                                                                                                                                                                                                                                                                                                                                                                                                                                                                                                                                                                                                                                                                                                                                                                                                                                                                                                                                                                                                                                                                                                                                                                                                                                                                                                                                                                                                                                                                                                                                                                                                                                                                                                                                                                                                                                                                                                                                                                                                                                                                                                                                                                                                                                                                                                                                                                                                                                                                                                                                                                                                                                                                                                                                                                                                                                                                                                                                                                                                                                                                                                                                                                                                                                                                                                                                                                                                                                                                                                                                                                                                                                                                                                                                                                                                                                                                                                                                                                                                                                                                                                                                                                                                                                                                                                                                   |
| PER1        | -2.127 | 0.00999 | 202861_at    | period homolog 1 (Drosophila)                                                                                                                                                                                                                                                                                                                                                                                                                                                                                                                                                                                                                                                                                                                                                                                                                                                                                                                                                                                                                                                                                                                                                                                                                                                                                                                                                                                                                                                                                                                                                                                                                                                                                                                                                                                                                                                                                                                                                                                                                                                                                                                                                                                                                                                                                                                                                                                                                                                                                                                                                                                                                                                                                                                                                                                                                                                                                                                                                                                                                                                                                                                                                                                                                                                                                                                                                                                                                                                                                                                                                                                                                                                                                                                                                                                                                                                                                                                                                                                                                                                                                                                                                                                                                                                                                                                                                                                                                                                                                                                                                                                                                                                                                                                                                                                                                                                                                                                                                                                                                                                                                                                                                                                                                                                                                                                                                                                                                                                                                                                                                                                                                                                                                                                                                                                                                                                                                                                                                                                                                                                                                                                                                                                                                                                                                                                                                                                                                                                                                                                                                                                                                                                                                                                                                                                                                                                                                                                                                                                                                                                                                                                                                                                                                                                                                                                                                                                                                                                                                                                                                                                                                                                                                                                                                                                                                                                                                                                                                                                                                                                                                                                                                                                                                                                                                                                                                                                                                                                                                                                                                                                                                                                                                                                                                                                                                                                                                                                                                                                                                                                                                                                                                                                                                                                                                                                                                                                                                                                                                                                                                                                                                                                                                                                                                                                                                                                                                                                                                                                                                                                                                                                                                                                                                                                                                                                                                                                                                                                                                                                                                                                                                                                                                                                                                                                                                                                                                                                                                                                                                                                                                                                                                                                                                                                                                                                                                                                                                                                                                                                                                                                                                                                                                                                                                                                                                                                                                                                                                                                                                                                                                                                                                                                                                                                                                                                                                                                                                                                                                                                                                                                                                                                                                                                                                                                                                                                                                                                                                                                                                                                                                                                                                                                                                                                                                                                                                                                                                                                                                                                                                                                                                                                                                                                                                                                                                                                                                                                                                                                                                                                                                                                                                                                                                                                                                                                                                                                                                                                                                                                                                                                                                                                                                                                                                                                                                                                                                                                                                                                                                                                                                                                                                                                                                                                                                                                                                                                                                                                                                                                                                                                                                                                                                                                                                                                                                                                                                                                                                                                                                                                                                                                                                                                                                                                                                                                                                                                                                                                                                                                                                                                                                                                                                                                                                                                                                                                                                                                                                                                                                                                                                                                                                                                                                                                                                                                                                                                                                                                                                                                                                                                                                                                                                                                                                                                                                                                                                                                                                                                                                                                                                                                                                                                                                                                                                                                                                                                                                                                                                                                                                                                                                                                                                                                                                                                                                                                                                                                                                                                                                                                                                                                                                                                                                                                                                                                                                                                                                                                                                                                                                                                                                                                                                                                                                                                                                                                                                                                                                                                                                                                                                                                                                                                                                                                                                                                                                                                                                                                                                                                                                                                                                                                                                                                                                 |
| SETD1B      | -0.524 | 0.0101  | 213153_at    | SET domain containing 1B                                                                                                                                                                                                                                                                                                                                                                                                                                                                                                                                                                                                                                                                                                                                                                                                                                                                                                                                                                                                                                                                                                                                                                                                                                                                                                                                                                                                                                                                                                                                                                                                                                                                                                                                                                                                                                                                                                                                                                                                                                                                                                                                                                                                                                                                                                                                                                                                                                                                                                                                                                                                                                                                                                                                                                                                                                                                                                                                                                                                                                                                                                                                                                                                                                                                                                                                                                                                                                                                                                                                                                                                                                                                                                                                                                                                                                                                                                                                                                                                                                                                                                                                                                                                                                                                                                                                                                                                                                                                                                                                                                                                                                                                                                                                                                                                                                                                                                                                                                                                                                                                                                                                                                                                                                                                                                                                                                                                                                                                                                                                                                                                                                                                                                                                                                                                                                                                                                                                                                                                                                                                                                                                                                                                                                                                                                                                                                                                                                                                                                                                                                                                                                                                                                                                                                                                                                                                                                                                                                                                                                                                                                                                                                                                                                                                                                                                                                                                                                                                                                                                                                                                                                                                                                                                                                                                                                                                                                                                                                                                                                                                                                                                                                                                                                                                                                                                                                                                                                                                                                                                                                                                                                                                                                                                                                                                                                                                                                                                                                                                                                                                                                                                                                                                                                                                                                                                                                                                                                                                                                                                                                                                                                                                                                                                                                                                                                                                                                                                                                                                                                                                                                                                                                                                                                                                                                                                                                                                                                                                                                                                                                                                                                                                                                                                                                                                                                                                                                                                                                                                                                                                                                                                                                                                                                                                                                                                                                                                                                                                                                                                                                                                                                                                                                                                                                                                                                                                                                                                                                                                                                                                                                                                                                                                                                                                                                                                                                                                                                                                                                                                                                                                                                                                                                                                                                                                                                                                                                                                                                                                                                                                                                                                                                                                                                                                                                                                                                                                                                                                                                                                                                                                                                                                                                                                                                                                                                                                                                                                                                                                                                                                                                                                                                                                                                                                                                                                                                                                                                                                                                                                                                                                                                                                                                                                                                                                                                                                                                                                                                                                                                                                                                                                                                                                                                                                                                                                                                                                                                                                                                                                                                                                                                                                                                                                                                                                                                                                                                                                                                                                                                                                                                                                                                                                                                                                                                                                                                                                                                                                                                                                                                                                                                                                                                                                                                                                                                                                                                                                                                                                                                                                                                                                                                                                                                                                                                                                                                                                                                                                                                                                                                                                                                                                                                                                                                                                                                                                                                                                                                                                                                                                                                                                                                                                                                                                                                                                                                                                                                                                                                                                                                                                                                                                                                                                                                                                                                                                                                                                                                                                                                                                                                                                                                                                                                                                                                                                                                                                                                                                                                                                                                                                                                                                                                                                                                                                                                                                                                                                                                                                                                                                                                                                                                                                                                                                                                                                                                                                                                                                                                                                                                                                                                                                                                                                                      |
| ALDH4A1     | -2.948 | 0.0101  | 212224_at    | aldehyde dehydrogenase 1 family, member A1                                                                                                                                                                                                                                                                                                                                                                                                                                                                                                                                                                                                                                                                                                                                                                                                                                                                                                                                                                                                                                                                                                                                                                                                                                                                                                                                                                                                                                                                                                                                                                                                                                                                                                                                                                                                                                                                                                                                                                                                                                                                                                                                                                                                                                                                                                                                                                                                                                                                                                                                                                                                                                                                                                                                                                                                                                                                                                                                                                                                                                                                                                                                                                                                                                                                                                                                                                                                                                                                                                                                                                                                                                                                                                                                                                                                                                                                                                                                                                                                                                                                                                                                                                                                                                                                                                                                                                                                                                                                                                                                                                                                                                                                                                                                                                                                                                                                                                                                                                                                                                                                                                                                                                                                                                                                                                                                                                                                                                                                                                                                                                                                                                                                                                                                                                                                                                                                                                                                                                                                                                                                                                                                                                                                                                                                                                                                                                                                                                                                                                                                                                                                                                                                                                                                                                                                                                                                                                                                                                                                                                                                                                                                                                                                                                                                                                                                                                                                                                                                                                                                                                                                                                                                                                                                                                                                                                                                                                                                                                                                                                                                                                                                                                                                                                                                                                                                                                                                                                                                                                                                                                                                                                                                                                                                                                                                                                                                                                                                                                                                                                                                                                                                                                                                                                                                                                                                                                                                                                                                                                                                                                                                                                                                                                                                                                                                                                                                                                                                                                                                                                                                                                                                                                                                                                                                                                                                                                                                                                                                                                                                                                                                                                                                                                                                                                                                                                                                                                                                                                                                                                                                                                                                                                                                                                                                                                                                                                                                                                                                                                                                                                                                                                                                                                                                                                                                                                                                                                                                                                                                                                                                                                                                                                                                                                                                                                                                                                                                                                                                                                                                                                                                                                                                                                                                                                                                                                                                                                                                                                                                                                                                                                                                                                                                                                                                                                                                                                                                                                                                                                                                                                                                                                                                                                                                                                                                                                                                                                                                                                                                                                                                                                                                                                                                                                                                                                                                                                                                                                                                                                                                                                                                                                                                                                                                                                                                                                                                                                                                                                                                                                                                                                                                                                                                                                                                                                                                                                                                                                                                                                                                                                                                                                                                                                                                                                                                                                                                                                                                                                                                                                                                                                                                                                                                                                                                                                                                                                                                                                                                                                                                                                                                                                                                                                                                                                                                                                                                                                                                                                                                                                                                                                                                                                                                                                                                                                                                                                                                                                                                                                                                                                                                                                                                                                                                                                                                                                                                                                                                                                                                                                                                                                                                                                                                                                                                                                                                                                                                                                                                                                                                                                                                                                                                                                                                                                                                                                                                                                                                                                                                                                                                                                                                                                                                                                                                                                                                                                                                                                                                                                                                                                                                                                                                                                                                                                                                                                                                                                                                                                                                                                                                                                                                                                                                                                                                                                                                                                                                                                                                                                                                                                                                                                                                                                                                    |
| C18orf34    | -3.022 | 0.0101  | 1558820_a_at | chromosome 18 open reading frame 34                                                                                                                                                                                                                                                                                                                                                                                                                                                                                                                                                                                                                                                                                                                                                                                                                                                                                                                                                                                                                                                                                                                                                                                                                                                                                                                                                                                                                                                                                                                                                                                                                                                                                                                                                                                                                                                                                                                                                                                                                                                                                                                                                                                                                                                                                                                                                                                                                                                                                                                                                                                                                                                                                                                                                                                                                                                                                                                                                                                                                                                                                                                                                                                                                                                                                                                                                                                                                                                                                                                                                                                                                                                                                                                                                                                                                                                                                                                                                                                                                                                                                                                                                                                                                                                                                                                                                                                                                                                                                                                                                                                                                                                                                                                                                                                                                                                                                                                                                                                                                                                                                                                                                                                                                                                                                                                                                                                                                                                                                                                                                                                                                                                                                                                                                                                                                                                                                                                                                                                                                                                                                                                                                                                                                                                                                                                                                                                                                                                                                                                                                                                                                                                                                                                                                                                                                                                                                                                                                                                                                                                                                                                                                                                                                                                                                                                                                                                                                                                                                                                                                                                                                                                                                                                                                                                                                                                                                                                                                                                                                                                                                                                                                                                                                                                                                                                                                                                                                                                                                                                                                                                                                                                                                                                                                                                                                                                                                                                                                                                                                                                                                                                                                                                                                                                                                                                                                                                                                                                                                                                                                                                                                                                                                                                                                                                                                                                                                                                                                                                                                                                                                                                                                                                                                                                                                                                                                                                                                                                                                                                                                                                                                                                                                                                                                                                                                                                                                                                                                                                                                                                                                                                                                                                                                                                                                                                                                                                                                                                                                                                                                                                                                                                                                                                                                                                                                                                                                                                                                                                                                                                                                                                                                                                                                                                                                                                                                                                                                                                                                                                                                                                                                                                                                                                                                                                                                                                                                                                                                                                                                                                                                                                                                                                                                                                                                                                                                                                                                                                                                                                                                                                                                                                                                                                                                                                                                                                                                                                                                                                                                                                                                                                                                                                                                                                                                                                                                                                                                                                                                                                                                                                                                                                                                                                                                                                                                                                                                                                                                                                                                                                                                                                                                                                                                                                                                                                                                                                                                                                                                                                                                                                                                                                                                                                                                                                                                                                                                                                                                                                                                                                                                                                                                                                                                                                                                                                                                                                                                                                                                                                                                                                                                                                                                                                                                                                                                                                                                                                                                                                                                                                                                                                                                                                                                                                                                                                                                                                                                                                                                                                                                                                                                                                                                                                                                                                                                                                                                                                                                                                                                                                                                                                                                                                                                                                                                                                                                                                                                                                                                                                                                                                                                                                                                                                                                                                                                                                                                                                                                                                                                                                                                                                                                                                                                                                                                                                                                                                                                                                                                                                                                                                                                                                                                                                                                                                                                                                                                                                                                                                                                                                                                                                                                                                                                                                                                                                                                                                                                                                                                                                                                                                                                                                                                                                                           |
| ECE1        | -1.241 | 0.0102  | 201749_at    | endothelin converting enzyme 1                                                                                                                                                                                                                                                                                                                                                                                                                                                                                                                                                                                                                                                                                                                                                                                                                                                                                                                                                                                                                                                                                                                                                                                                                                                                                                                                                                                                                                                                                                                                                                                                                                                                                                                                                                                                                                                                                                                                                                                                                                                                                                                                                                                                                                                                                                                                                                                                                                                                                                                                                                                                                                                                                                                                                                                                                                                                                                                                                                                                                                                                                                                                                                                                                                                                                                                                                                                                                                                                                                                                                                                                                                                                                                                                                                                                                                                                                                                                                                                                                                                                                                                                                                                                                                                                                                                                                                                                                                                                                                                                                                                                                                                                                                                                                                                                                                                                                                                                                                                                                                                                                                                                                                                                                                                                                                                                                                                                                                                                                                                                                                                                                                                                                                                                                                                                                                                                                                                                                                                                                                                                                                                                                                                                                                                                                                                                                                                                                                                                                                                                                                                                                                                                                                                                                                                                                                                                                                                                                                                                                                                                                                                                                                                                                                                                                                                                                                                                                                                                                                                                                                                                                                                                                                                                                                                                                                                                                                                                                                                                                                                                                                                                                                                                                                                                                                                                                                                                                                                                                                                                                                                                                                                                                                                                                                                                                                                                                                                                                                                                                                                                                                                                                                                                                                                                                                                                                                                                                                                                                                                                                                                                                                                                                                                                                                                                                                                                                                                                                                                                                                                                                                                                                                                                                                                                                                                                                                                                                                                                                                                                                                                                                                                                                                                                                                                                                                                                                                                                                                                                                                                                                                                                                                                                                                                                                                                                                                                                                                                                                                                                                                                                                                                                                                                                                                                                                                                                                                                                                                                                                                                                                                                                                                                                                                                                                                                                                                                                                                                                                                                                                                                                                                                                                                                                                                                                                                                                                                                                                                                                                                                                                                                                                                                                                                                                                                                                                                                                                                                                                                                                                                                                                                                                                                                                                                                                                                                                                                                                                                                                                                                                                                                                                                                                                                                                                                                                                                                                                                                                                                                                                                                                                                                                                                                                                                                                                                                                                                                                                                                                                                                                                                                                                                                                                                                                                                                                                                                                                                                                                                                                                                                                                                                                                                                                                                                                                                                                                                                                                                                                                                                                                                                                                                                                                                                                                                                                                                                                                                                                                                                                                                                                                                                                                                                                                                                                                                                                                                                                                                                                                                                                                                                                                                                                                                                                                                                                                                                                                                                                                                                                                                                                                                                                                                                                                                                                                                                                                                                                                                                                                                                                                                                                                                                                                                                                                                                                                                                                                                                                                                                                                                                                                                                                                                                                                                                                                                                                                                                                                                                                                                                                                                                                                                                                                                                                                                                                                                                                                                                                                                                                                                                                                                                                                                                                                                                                                                                                                                                                                                                                                                                                                                                                                                                                                                                                                                                                                                                                                                                                                                                                                                                                                                                                                                                                                |
| RPP38       | 0.838  | 0.0102  | 205562_at    | ribonuclease P/MRP 38kDa subunit                                                                                                                                                                                                                                                                                                                                                                                                                                                                                                                                                                                                                                                                                                                                                                                                                                                                                                                                                                                                                                                                                                                                                                                                                                                                                                                                                                                                                                                                                                                                                                                                                                                                                                                                                                                                                                                                                                                                                                                                                                                                                                                                                                                                                                                                                                                                                                                                                                                                                                                                                                                                                                                                                                                                                                                                                                                                                                                                                                                                                                                                                                                                                                                                                                                                                                                                                                                                                                                                                                                                                                                                                                                                                                                                                                                                                                                                                                                                                                                                                                                                                                                                                                                                                                                                                                                                                                                                                                                                                                                                                                                                                                                                                                                                                                                                                                                                                                                                                                                                                                                                                                                                                                                                                                                                                                                                                                                                                                                                                                                                                                                                                                                                                                                                                                                                                                                                                                                                                                                                                                                                                                                                                                                                                                                                                                                                                                                                                                                                                                                                                                                                                                                                                                                                                                                                                                                                                                                                                                                                                                                                                                                                                                                                                                                                                                                                                                                                                                                                                                                                                                                                                                                                                                                                                                                                                                                                                                                                                                                                                                                                                                                                                                                                                                                                                                                                                                                                                                                                                                                                                                                                                                                                                                                                                                                                                                                                                                                                                                                                                                                                                                                                                                                                                                                                                                                                                                                                                                                                                                                                                                                                                                                                                                                                                                                                                                                                                                                                                                                                                                                                                                                                                                                                                                                                                                                                                                                                                                                                                                                                                                                                                                                                                                                                                                                                                                                                                                                                                                                                                                                                                                                                                                                                                                                                                                                                                                                                                                                                                                                                                                                                                                                                                                                                                                                                                                                                                                                                                                                                                                                                                                                                                                                                                                                                                                                                                                                                                                                                                                                                                                                                                                                                                                                                                                                                                                                                                                                                                                                                                                                                                                                                                                                                                                                                                                                                                                                                                                                                                                                                                                                                                                                                                                                                                                                                                                                                                                                                                                                                                                                                                                                                                                                                                                                                                                                                                                                                                                                                                                                                                                                                                                                                                                                                                                                                                                                                                                                                                                                                                                                                                                                                                                                                                                                                                                                                                                                                                                                                                                                                                                                                                                                                                                                                                                                                                                                                                                                                                                                                                                                                                                                                                                                                                                                                                                                                                                                                                                                                                                                                                                                                                                                                                                                                                                                                                                                                                                                                                                                                                                                                                                                                                                                                                                                                                                                                                                                                                                                                                                                                                                                                                                                                                                                                                                                                                                                                                                                                                                                                                                                                                                                                                                                                                                                                                                                                                                                                                                                                                                                                                                                                                                                                                                                                                                                                                                                                                                                                                                                                                                                                                                                                                                                                                                                                                                                                                                                                                                                                                                                                                                                                                                                                                                                                                                                                                                                                                                                                                                                                                                                                                                                                                                                                                                                                                                                                                                                                                                                                                                                                                                                                                                                                                                                                              |
| MCM2        | 1.681  | 0.0102  | 202107_s_at  | minichromosome maintenance complex component 2                                                                                                                                                                                                                                                                                                                                                                                                                                                                                                                                                                                                                                                                                                                                                                                                                                                                                                                                                                                                                                                                                                                                                                                                                                                                                                                                                                                                                                                                                                                                                                                                                                                                                                                                                                                                                                                                                                                                                                                                                                                                                                                                                                                                                                                                                                                                                                                                                                                                                                                                                                                                                                                                                                                                                                                                                                                                                                                                                                                                                                                                                                                                                                                                                                                                                                                                                                                                                                                                                                                                                                                                                                                                                                                                                                                                                                                                                                                                                                                                                                                                                                                                                                                                                                                                                                                                                                                                                                                                                                                                                                                                                                                                                                                                                                                                                                                                                                                                                                                                                                                                                                                                                                                                                                                                                                                                                                                                                                                                                                                                                                                                                                                                                                                                                                                                                                                                                                                                                                                                                                                                                                                                                                                                                                                                                                                                                                                                                                                                                                                                                                                                                                                                                                                                                                                                                                                                                                                                                                                                                                                                                                                                                                                                                                                                                                                                                                                                                                                                                                                                                                                                                                                                                                                                                                                                                                                                                                                                                                                                                                                                                                                                                                                                                                                                                                                                                                                                                                                                                                                                                                                                                                                                                                                                                                                                                                                                                                                                                                                                                                                                                                                                                                                                                                                                                                                                                                                                                                                                                                                                                                                                                                                                                                                                                                                                                                                                                                                                                                                                                                                                                                                                                                                                                                                                                                                                                                                                                                                                                                                                                                                                                                                                                                                                                                                                                                                                                                                                                                                                                                                                                                                                                                                                                                                                                                                                                                                                                                                                                                                                                                                                                                                                                                                                                                                                                                                                                                                                                                                                                                                                                                                                                                                                                                                                                                                                                                                                                                                                                                                                                                                                                                                                                                                                                                                                                                                                                                                                                                                                                                                                                                                                                                                                                                                                                                                                                                                                                                                                                                                                                                                                                                                                                                                                                                                                                                                                                                                                                                                                                                                                                                                                                                                                                                                                                                                                                                                                                                                                                                                                                                                                                                                                                                                                                                                                                                                                                                                                                                                                                                                                                                                                                                                                                                                                                                                                                                                                                                                                                                                                                                                                                                                                                                                                                                                                                                                                                                                                                                                                                                                                                                                                                                                                                                                                                                                                                                                                                                                                                                                                                                                                                                                                                                                                                                                                                                                                                                                                                                                                                                                                                                                                                                                                                                                                                                                                                                                                                                                                                                                                                                                                                                                                                                                                                                                                                                                                                                                                                                                                                                                                                                                                                                                                                                                                                                                                                                                                                                                                                                                                                                                                                                                                                                                                                                                                                                                                                                                                                                                                                                                                                                                                                                                                                                                                                                                                                                                                                                                                                                                                                                                                                                                                                                                                                                                                                                                                                                                                                                                                                                                                                                                                                                                                                                                                                                                                                                                                                                                                                                                                                                                                                                                                                                                                |
| CD34        | -2.408 | 0.0102  | 209543_s_at  | CD34 molecule                                                                                                                                                                                                                                                                                                                                                                                                                                                                                                                                                                                                                                                                                                                                                                                                                                                                                                                                                                                                                                                                                                                                                                                                                                                                                                                                                                                                                                                                                                                                                                                                                                                                                                                                                                                                                                                                                                                                                                                                                                                                                                                                                                                                                                                                                                                                                                                                                                                                                                                                                                                                                                                                                                                                                                                                                                                                                                                                                                                                                                                                                                                                                                                                                                                                                                                                                                                                                                                                                                                                                                                                                                                                                                                                                                                                                                                                                                                                                                                                                                                                                                                                                                                                                                                                                                                                                                                                                                                                                                                                                                                                                                                                                                                                                                                                                                                                                                                                                                                                                                                                                                                                                                                                                                                                                                                                                                                                                                                                                                                                                                                                                                                                                                                                                                                                                                                                                                                                                                                                                                                                                                                                                                                                                                                                                                                                                                                                                                                                                                                                                                                                                                                                                                                                                                                                                                                                                                                                                                                                                                                                                                                                                                                                                                                                                                                                                                                                                                                                                                                                                                                                                                                                                                                                                                                                                                                                                                                                                                                                                                                                                                                                                                                                                                                                                                                                                                                                                                                                                                                                                                                                                                                                                                                                                                                                                                                                                                                                                                                                                                                                                                                                                                                                                                                                                                                                                                                                                                                                                                                                                                                                                                                                                                                                                                                                                                                                                                                                                                                                                                                                                                                                                                                                                                                                                                                                                                                                                                                                                                                                                                                                                                                                                                                                                                                                                                                                                                                                                                                                                                                                                                                                                                                                                                                                                                                                                                                                                                                                                                                                                                                                                                                                                                                                                                                                                                                                                                                                                                                                                                                                                                                                                                                                                                                                                                                                                                                                                                                                                                                                                                                                                                                                                                                                                                                                                                                                                                                                                                                                                                                                                                                                                                                                                                                                                                                                                                                                                                                                                                                                                                                                                                                                                                                                                                                                                                                                                                                                                                                                                                                                                                                                                                                                                                                                                                                                                                                                                                                                                                                                                                                                                                                                                                                                                                                                                                                                                                                                                                                                                                                                                                                                                                                                                                                                                                                                                                                                                                                                                                                                                                                                                                                                                                                                                                                                                                                                                                                                                                                                                                                                                                                                                                                                                                                                                                                                                                                                                                                                                                                                                                                                                                                                                                                                                                                                                                                                                                                                                                                                                                                                                                                                                                                                                                                                                                                                                                                                                                                                                                                                                                                                                                                                                                                                                                                                                                                                                                                                                                                                                                                                                                                                                                                                                                                                                                                                                                                                                                                                                                                                                                                                                                                                                                                                                                                                                                                                                                                                                                                                                                                                                                                                                                                                                                                                                                                                                                                                                                                                                                                                                                                                                                                                                                                                                                                                                                                                                                                                                                                                                                                                                                                                                                                                                                                                                                                                                                                                                                                                                                                                                                                                                                                                                                                                                                 |
| GIN51       | 2.074  | 0.0102  | 206102_at    | GIN5 complex subunit 1 (Psf1 homolog)                                                                                                                                                                                                                                                                                                                                                                                                                                                                                                                                                                                                                                                                                                                                                                                                                                                                                                                                                                                                                                                                                                                                                                                                                                                                                                                                                                                                                                                                                                                                                                                                                                                                                                                                                                                                                                                                                                                                                                                                                                                                                                                                                                                                                                                                                                                                                                                                                                                                                                                                                                                                                                                                                                                                                                                                                                                                                                                                                                                                                                                                                                                                                                                                                                                                                                                                                                                                                                                                                                                                                                                                                                                                                                                                                                                                                                                                                                                                                                                                                                                                                                                                                                                                                                                                                                                                                                                                                                                                                                                                                                                                                                                                                                                                                                                                                                                                                                                                                                                                                                                                                                                                                                                                                                                                                                                                                                                                                                                                                                                                                                                                                                                                                                                                                                                                                                                                                                                                                                                                                                                                                                                                                                                                                                                                                                                                                                                                                                                                                                                                                                                                                                                                                                                                                                                                                                                                                                                                                                                                                                                                                                                                                                                                                                                                                                                                                                                                                                                                                                                                                                                                                                                                                                                                                                                                                                                                                                                                                                                                                                                                                                                                                                                                                                                                                                                                                                                                                                                                                                                                                                                                                                                                                                                                                                                                                                                                                                                                                                                                                                                                                                                                                                                                                                                                                                                                                                                                                                                                                                                                                                                                                                                                                                                                                                                                                                                                                                                                                                                                                                                                                                                                                                                                                                                                                                                                                                                                                                                                                                                                                                                                                                                                                                                                                                                                                                                                                                                                                                                                                                                                                                                                                                                                                                                                                                                                                                                                                                                                                                                                                                                                                                                                                                                                                                                                                                                                                                                                                                                                                                                                                                                                                                                                                                                                                                                                                                                                                                                                                                                                                                                                                                                                                                                                                                                                                                                                                                                                                                                                                                                                                                                                                                                                                                                                                                                                                                                                                                                                                                                                                                                                                                                                                                                                                                                                                                                                                                                                                                                                                                                                                                                                                                                                                                                                                                                                                                                                                                                                                                                                                                                                                                                                                                                                                                                                                                                                                                                                                                                                                                                                                                                                                                                                                                                                                                                                                                                                                                                                                                                                                                                                                                                                                                                                                                                                                                                                                                                                                                                                                                                                                                                                                                                                                                                                                                                                                                                                                                                                                                                                                                                                                                                                                                                                                                                                                                                                                                                                                                                                                                                                                                                                                                                                                                                                                                                                                                                                                                                                                                                                                                                                                                                                                                                                                                                                                                                                                                                                                                                                                                                                                                                                                                                                                                                                                                                                                                                                                                                                                                                                                                                                                                                                                                                                                                                                                                                                                                                                                                                                                                                                                                                                                                                                                                                                                                                                                                                                                                                                                                                                                                                                                                                                                                                                                                                                                                                                                                                                                                                                                                                                                                                                                                                                                                                                                                                                                                                                                                                                                                                                                                                                                                                                                                                                         |
| STIL        | 1.687  | 0.0102  | 205339_at    | SCL/TAL1 interrupting locus                                                                                                                                                                                                                                                                                                                                                                                                                                                                                                                                                                                                                                                                                                                                                                                                                                                                                                                                                                                                                                                                                                                                                                                                                                                                                                                                                                                                                                                                                                                                                                                                                                                                                                                                                                                                                                                                                                                                                                                                                                                                                                                                                                                                                                                                                                                                                                                                                                                                                                                                                                                                                                                                                                                                                                                                                                                                                                                                                                                                                                                                                                                                                                                                                                                                                                                                                                                                                                                                                                                                                                                                                                                                                                                                                                                                                                                                                                                                                                                                                                                                                                                                                                                                                                                                                                                                                                                                                                                                                                                                                                                                                                                                                                                                                                                                                                                                                                                                                                                                                                                                                                                                                                                                                                                                                                                                                                                                                                                                                                                                                                                                                                                                                                                                                                                                                                                                                                                                                                                                                                                                                                                                                                                                                                                                                                                                                                                                                                                                                                                                                                                                                                                                                                                                                                                                                                                                                                                                                                                                                                                                                                                                                                                                                                                                                                                                                                                                                                                                                                                                                                                                                                                                                                                                                                                                                                                                                                                                                                                                                                                                                                                                                                                                                                                                                                                                                                                                                                                                                                                                                                                                                                                                                                                                                                                                                                                                                                                                                                                                                                                                                                                                                                                                                                                                                                                                                                                                                                                                                                                                                                                                                                                                                                                                                                                                                                                                                                                                                                                                                                                                                                                                                                                                                                                                                                                                                                                                                                                                                                                                                                                                                                                                                                                                                                                                                                                                                                                                                                                                                                                                                                                                                                                                                                                                                                                                                                                                                                                                                                                                                                                                                                                                                                                                                                                                                                                                                                                                                                                                                                                                                                                                                                                                                                                                                                                                                                                                                                                                                                                                                                                                                                                                                                                                                                                                                                                                                                                                                                                                                                                                                                                                                                                                                                                                                                                                                                                                                                                                                                                                                                                                                                                                                                                                                                                                                                                                                                                                                                                                                                                                                                                                                                                                                                                                                                                                                                                                                                                                                                                                                                                                                                                                                                                                                                                                                                                                                                                                                                                                                                                                                                                                                                                                                                                                                                                                                                                                                                                                                                                                                                                                                                                                                                                                                                                                                                                                                                                                                                                                                                                                                                                                                                                                                                                                                                                                                                                                                                                                                                                                                                                                                                                                                                                                                                                                                                                                                                                                                                                                                                                                                                                                                                                                                                                                                                                                                                                                                                                                                                                                                                                                                                                                                                                                                                                                                                                                                                                                                                                                                                                                                                                                                                                                                                                                                                                                                                                                                                                                                                                                                                                                                                                                                                                                                                                                                                                                                                                                                                                                                                                                                                                                                                                                                                                                                                                                                                                                                                                                                                                                                                                                                                                                                                                                                                                                                                                                                                                                                                                                                                                                                                                                                                                                                                                                                                                                                                                                                                                                                                                                                                                                                                                                                                                                                   |
| MTA3        | 0.925  | 0.0103  | 223311_s_at  | metastasis associated 1 family, member 3                                                                                                                                                                                                                                                                                                                                                                                                                                                                                                                                                                                                                                                                                                                                                                                                                                                                                                                                                                                                                                                                                                                                                                                                                                                                                                                                                                                                                                                                                                                                                                                                                                                                                                                                                                                                                                                                                                                                                                                                                                                                                                                                                                                                                                                                                                                                                                                                                                                                                                                                                                                                                                                                                                                                                                                                                                                                                                                                                                                                                                                                                                                                                                                                                                                                                                                                                                                                                                                                                                                                                                                                                                                                                                                                                                                                                                                                                                                                                                                                                                                                                                                                                                                                                                                                                                                                                                                                                                                                                                                                                                                                                                                                                                                                                                                                                                                                                                                                                                                                                                                                                                                                                                                                                                                                                                                                                                                                                                                                                                                                                                                                                                                                                                                                                                                                                                                                                                                                                                                                                                                                                                                                                                                                                                                                                                                                                                                                                                                                                                                                                                                                                                                                                                                                                                                                                                                                                                                                                                                                                                                                                                                                                                                                                                                                                                                                                                                                                                                                                                                                                                                                                                                                                                                                                                                                                                                                                                                                                                                                                                                                                                                                                                                                                                                                                                                                                                                                                                                                                                                                                                                                                                                                                                                                                                                                                                                                                                                                                                                                                                                                                                                                                                                                                                                                                                                                                                                                                                                                                                                                                                                                                                                                                                                                                                                                                                                                                                                                                                                                                                                                                                                                                                                                                                                                                                                                                                                                                                                                                                                                                                                                                                                                                                                                                                                                                                                                                                                                                                                                                                                                                                                                                                                                                                                                                                                                                                                                                                                                                                                                                                                                                                                                                                                                                                                                                                                                                                                                                                                                                                                                                                                                                                                                                                                                                                                                                                                                                                                                                                                                                                                                                                                                                                                                                                                                                                                                                                                                                                                                                                                                                                                                                                                                                                                                                                                                                                                                                                                                                                                                                                                                                                                                                                                                                                                                                                                                                                                                                                                                                                                                                                                                                                                                                                                                                                                                                                                                                                                                                                                                                                                                                                                                                                                                                                                                                                                                                                                                                                                                                                                                                                                                                                                                                                                                                                                                                                                                                                                                                                                                                                                                                                                                                                                                                                                                                                                                                                                                                                                                                                                                                                                                                                                                                                                                                                                                                                                                                                                                                                                                                                                                                                                                                                                                                                                                                                                                                                                                                                                                                                                                                                                                                                                                                                                                                                                                                                                                                                                                                                                                                                                                                                                                                                                                                                                                                                                                                                                                                                                                                                                                                                                                                                                                                                                                                                                                                                                                                                                                                                                                                                                                                                                                                                                                                                                                                                                                                                                                                                                                                                                                                                                                                                                                                                                                                                                                                                                                                                                                                                                                                                                                                                                                                                                                                                                                                                                                                                                                                                                                                                                                                                                                                                                                                                                                                                                                                                                                                                                                                                                                                                                                                                                                                                                                      |
| LRRC1       | 2.357  | 0.0104  | 218816_at    | leucine rich repeat containing 1                                                                                                                                                                                                                                                                                                                                                                                                                                                                                                                                                                                                                                                                                                                                                                                                                                                                                                                                                                                                                                                                                                                                                                                                                                                                                                                                                                                                                                                                                                                                                                                                                                                                                                                                                                                                                                                                                                                                                                                                                                                                                                                                                                                                                                                                                                                                                                                                                                                                                                                                                                                                                                                                                                                                                                                                                                                                                                                                                                                                                                                                                                                                                                                                                                                                                                                                                                                                                                                                                                                                                                                                                                                                                                                                                                                                                                                                                                                                                                                                                                                                                                                                                                                                                                                                                                                                                                                                                                                                                                                                                                                                                                                                                                                                                                                                                                                                                                                                                                                                                                                                                                                                                                                                                                                                                                                                                                                                                                                                                                                                                                                                                                                                                                                                                                                                                                                                                                                                                                                                                                                                                                                                                                                                                                                                                                                                                                                                                                                                                                                                                                                                                                                                                                                                                                                                                                                                                                                                                                                                                                                                                                                                                                                                                                                                                                                                                                                                                                                                                                                                                                                                                                                                                                                                                                                                                                                                                                                                                                                                                                                                                                                                                                                                                                                                                                                                                                                                                                                                                                                                                                                                                                                                                                                                                                                                                                                                                                                                                                                                                                                                                                                                                                                                                                                                                                                                                                                                                                                                                                                                                                                                                                                                                                                                                                                                                                                                                                                                                                                                                                                                                                                                                                                                                                                                                                                                                                                                                                                                                                                                                                                                                                                                                                                                                                                                                                                                                                                                                                                                                                                                                                                                                                                                                                                                                                                                                                                                                                                                                                                                                                                                                                                                                                                                                                                                                                                                                                                                                                                                                                                                                                                                                                                                                                                                                                                                                                                                                                                                                                                                                                                                                                                                                                                                                                                                                                                                                                                                                                                                                                                                                                                                                                                                                                                                                                                                                                                                                                                                                                                                                                                                                                                                                                                                                                                                                                                                                                                                                                                                                                                                                                                                                                                                                                                                                                                                                                                                                                                                                                                                                                                                                                                                                                                                                                                                                                                                                                                                                                                                                                                                                                                                                                                                                                                                                                                                                                                                                                                                                                                                                                                                                                                                                                                                                                                                                                                                                                                                                                                                                                                                                                                                                                                                                                                                                                                                                                                                                                                                                                                                                                                                                                                                                                                                                                                                                                                                                                                                                                                                                                                                                                                                                                                                                                                                                                                                                                                                                                                                                                                                                                                                                                                                                                                                                                                                                                                                                                                                                                                                                                                                                                                                                                                                                                                                                                                                                                                                                                                                                                                                                                                                                                                                                                                                                                                                                                                                                                                                                                                                                                                                                                                                                                                                                                                                                                                                                                                                                                                                                                                                                                                                                                                                                                                                                                                                                                                                                                                                                                                                                                                                                                                                                                                                                                                                                                                                                                                                                                                                                                                                                                                                                                                                                                                                              |
| CBS         | 1.637  | 0.0104  | 1553972_a_at | cystathionine-beta-synthase                                                                                                                                                                                                                                                                                                                                                                                                                                                                                                                                                                                                                                                                                                                                                                                                                                                                                                                                                                                                                                                                                                                                                                                                                                                                                                                                                                                                                                                                                                                                                                                                                                                                                                                                                                                                                                                                                                                                                                                                                                                                                                                                                                                                                                                                                                                                                                                                                                                                                                                                                                                                                                                                                                                                                                                                                                                                                                                                                                                                                                                                                                                                                                                                                                                                                                                                                                                                                                                                                                                                                                                                                                                                                                                                                                                                                                                                                                                                                                                                                                                                                                                                                                                                                                                                                                                                                                                                                                                                                                                                                                                                                                                                                                                                                                                                                                                                                                                                                                                                                                                                                                                                                                                                                                                                                                                                                                                                                                                                                                                                                                                                                                                                                                                                                                                                                                                                                                                                                                                                                                                                                                                                                                                                                                                                                                                                                                                                                                                                                                                                                                                                                                                                                                                                                                                                                                                                                                                                                                                                                                                                                                                                                                                                                                                                                                                                                                                                                                                                                                                                                                                                                                                                                                                                                                                                                                                                                                                                                                                                                                                                                                                                                                                                                                                                                                                                                                                                                                                                                                                                                                                                                                                                                                                                                                                                                                                                                                                                                                                                                                                                                                                                                                                                                                                                                                                                                                                                                                                                                                                                                                                                                                                                                                                                                                                                                                                                                                                                                                                                                                                                                                                                                                                                                                                                                                                                                                                                                                                                                                                                                                                                                                                                                                                                                                                                                                                                                                                                                                                                                                                                                                                                                                                                                                                                                                                                                                                                                                                                                                                                                                                                                                                                                                                                                                                                                                                                                                                                                                                                                                                                                                                                                                                                                                                                                                                                                                                                                                                                                                                                                                                                                                                                                                                                                                                                                                                                                                                                                                                                                                                                                                                                                                                                                                                                                                                                                                                                                                                                                                                                                                                                                                                                                                                                                                                                                                                                                                                                                                                                                                                                                                                                                                                                                                                                                                                                                                                                                                                                                                                                                                                                                                                                                                                                                                                                                                                                                                                                                                                                                                                                                                                                                                                                                                                                                                                                                                                                                                                                                                                                                                                                                                                                                                                                                                                                                                                                                                                                                                                                                                                                                                                                                                                                                                                                                                                                                                                                                                                                                                                                                                                                                                                                                                                                                                                                                                                                                                                                                                                                                                                                                                                                                                                                                                                                                                                                                                                                                                                                                                                                                                                                                                                                                                                                                                                                                                                                                                                                                                                                                                                                                                                                                                                                                                                                                                                                                                                                                                                                                                                                                                                                                                                                                                                                                                                                                                                                                                                                                                                                                                                                                                                                                                                                                                                                                                                                                                                                                                                                                                                                                                                                                                                                                                                                                                                                                                                                                                                                                                                                                                                                                                                                                                                                                                                                                                                                                                                                                                                                                                                                                                                                                                                                                                                                                   |
| RNF125      | -2.006 | 0.0106  | 235199_at    | ring finger protein 125, E3 ubiquitin protein ligase                                                                                                                                                                                                                                                                                                                                                                                                                                                                                                                                                                                                                                                                                                                                                                                                                                                                                                                                                                                                                                                                                                                                                                                                                                                                                                                                                                                                                                                                                                                                                                                                                                                                                                                                                                                                                                                                                                                                                                                                                                                                                                                                                                                                                                                                                                                                                                                                                                                                                                                                                                                                                                                                                                                                                                                                                                                                                                                                                                                                                                                                                                                                                                                                                                                                                                                                                                                                                                                                                                                                                                                                                                                                                                                                                                                                                                                                                                                                                                                                                                                                                                                                                                                                                                                                                                                                                                                                                                                                                                                                                                                                                                                                                                                                                                                                                                                                                                                                                                                                                                                                                                                                                                                                                                                                                                                                                                                                                                                                                                                                                                                                                                                                                                                                                                                                                                                                                                                                                                                                                                                                                                                                                                                                                                                                                                                                                                                                                                                                                                                                                                                                                                                                                                                                                                                                                                                                                                                                                                                                                                                                                                                                                                                                                                                                                                                                                                                                                                                                                                                                                                                                                                                                                                                                                                                                                                                                                                                                                                                                                                                                                                                                                                                                                                                                                                                                                                                                                                                                                                                                                                                                                                                                                                                                                                                                                                                                                                                                                                                                                                                                                                                                                                                                                                                                                                                                                                                                                                                                                                                                                                                                                                                                                                                                                                                                                                                                                                                                                                                                                                                                                                                                                                                                                                                                                                                                                                                                                                                                                                                                                                                                                                                                                                                                                                                                                                                                                                                                                                                                                                                                                                                                                                                                                                                                                                                                                                                                                                                                                                                                                                                                                                                                                                                                                                                                                                                                                                                                                                                                                                                                                                                                                                                                                                                                                                                                                                                                                                                                                                                                                                                                                                                                                                                                                                                                                                                                                                                                                                                                                                                                                                                                                                                                                                                                                                                                                                                                                                                                                                                                                                                                                                                                                                                                                                                                                                                                                                                                                                                                                                                                                                                                                                                                                                                                                                                                                                                                                                                                                                                                                                                                                                                                                                                                                                                                                                                                                                                                                                                                                                                                                                                                                                                                                                                                                                                                                                                                                                                                                                                                                                                                                                                                                                                                                                                                                                                                                                                                                                                                                                                                                                                                                                                                                                                                                                                                                                                                                                                                                                                                                                                                                                                                                                                                                                                                                                                                                                                                                                                                                                                                                                                                                                                                                                                                                                                                                                                                                                                                                                                                                                                                                                                                                                                                                                                                                                                                                                                                                                                                                                                                                                                                                                                                                                                                                                                                                                                                                                                                                                                                                                                                                                                                                                                                                                                                                                                                                                                                                                                                                                                                                                                                                                                                                                                                                                                                                                                                                                                                                                                                                                                                                                                                                                                                                                                                                                                                                                                                                                                                                                                                                                                                                                                                                                                                                                                                                                                                                                                                                                                                                                                                                                                                                                                          |
| UBL5        | 0.993  | 0.0106  | 218011_at    | ubiquitin-like 5                                                                                                                                                                                                                                                                                                                                                                                                                                                                                                                                                                                                                                                                                                                                                                                                                                                                                                                                                                                                                                                                                                                                                                                                                                                                                                                                                                                                                                                                                                                                                                                                                                                                                                                                                                                                                                                                                                                                                                                                                                                                                                                                                                                                                                                                                                                                                                                                                                                                                                                                                                                                                                                                                                                                                                                                                                                                                                                                                                                                                                                                                                                                                                                                                                                                                                                                                                                                                                                                                                                                                                                                                                                                                                                                                                                                                                                                                                                                                                                                                                                                                                                                                                                                                                                                                                                                                                                                                                                                                                                                                                                                                                                                                                                                                                                                                                                                                                                                                                                                                                                                                                                                                                                                                                                                                                                                                                                                                                                                                                                                                                                                                                                                                                                                                                                                                                                                                                                                                                                                                                                                                                                                                                                                                                                                                                                                                                                                                                                                                                                                                                                                                                                                                                                                                                                                                                                                                                                                                                                                                                                                                                                                                                                                                                                                                                                                                                                                                                                                                                                                                                                                                                                                                                                                                                                                                                                                                                                                                                                                                                                                                                                                                                                                                                                                                                                                                                                                                                                                                                                                                                                                                                                                                                                                                                                                                                                                                                                                                                                                                                                                                                                                                                                                                                                                                                                                                                                                                                                                                                                                                                                                                                                                                                                                                                                                                                                                                                                                                                                                                                                                                                                                                                                                                                                                                                                                                                                                                                                                                                                                                                                                                                                                                                                                                                                                                                                                                                                                                                                                                                                                                                                                                                                                                                                                                                                                                                                                                                                                                                                                                                                                                                                                                                                                                                                                                                                                                                                                                                                                                                                                                                                                                                                                                                                                                                                                                                                                                                                                                                                                                                                                                                                                                                                                                                                                                                                                                                                                                                                                                                                                                                                                                                                                                                                                                                                                                                                                                                                                                                                                                                                                                                                                                                                                                                                                                                                                                                                                                                                                                                                                                                                                                                                                                                                                                                                                                                                                                                                                                                                                                                                                                                                                                                                                                                                                                                                                                                                                                                                                                                                                                                                                                                                                                                                                                                                                                                                                                                                                                                                                                                                                                                                                                                                                                                                                                                                                                                                                                                                                                                                                                                                                                                                                                                                                                                                                                                                                                                                                                                                                                                                                                                                                                                                                                                                                                                                                                                                                                                                                                                                                                                                                                                                                                                                                                                                                                                                                                                                                                                                                                                                                                                                                                                                                                                                                                                                                                                                                                                                                                                                                                                                                                                                                                                                                                                                                                                                                                                                                                                                                                                                                                                                                                                                                                                                                                                                                                                                                                                                                                                                                                                                                                                                                                                                                                                                                                                                                                                                                                                                                                                                                                                                                                                                                                                                                                                                                                                                                                                                                                                                                                                                                                                                                                                                                                                                                                                                                                                                                                                                                                                                                                                                                                                                                                              |
| NDIFP2      | 1.908  | 0.0107  | 224799_at    | Nedd4 family interacting protein 2                                                                                                                                                                                                                                                                                                                                                                                                                                                                                                                                                                                                                                                                                                                                                                                                                                                                                                                                                                                                                                                                                                                                                                                                                                                                                                                                                                                                                                                                                                                                                                                                                                                                                                                                                                                                                                                                                                                                                                                                                                                                                                                                                                                                                                                                                                                                                                                                                                                                                                                                                                                                                                                                                                                                                                                                                                                                                                                                                                                                                                                                                                                                                                                                                                                                                                                                                                                                                                                                                                                                                                                                                                                                                                                                                                                                                                                                                                                                                                                                                                                                                                                                                                                                                                                                                                                                                                                                                                                                                                                                                                                                                                                                                                                                                                                                                                                                                                                                                                                                                                                                                                                                                                                                                                                                                                                                                                                                                                                                                                                                                                                                                                                                                                                                                                                                                                                                                                                                                                                                                                                                                                                                                                                                                                                                                                                                                                                                                                                                                                                                                                                                                                                                                                                                                                                                                                                                                                                                                                                                                                                                                                                                                                                                                                                                                                                                                                                                                                                                                                                                                                                                                                                                                                                                                                                                                                                                                                                                                                                                                                                                                                                                                                                                                                                                                                                                                                                                                                                                                                                                                                                                                                                                                                                                                                                                                                                                                                                                                                                                                                                                                                                                                                                                                                                                                                                                                                                                                                                                                                                                                                                                                                                                                                                                                                                                                                                                                                                                                                                                                                                                                                                                                                                                                                                                                                                                                                                                                                                                                                                                                                                                                                                                                                                                                                                                                                                                                                                                                                                                                                                                                                                                                                                                                                                                                                                                                                                                                                                                                                                                                                                                                                                                                                                                                                                                                                                                                                                                                                                                                                                                                                                                                                                                                                                                                                                                                                                                                                                                                                                                                                                                                                                                                                                                                                                                                                                                                                                                                                                                                                                                                                                                                                                                                                                                                                                                                                                                                                                                                                                                                                                                                                                                                                                                                                                                                                                                                                                                                                                                                                                                                                                                                                                                                                                                                                                                                                                                                                                                                                                                                                                                                                                                                                                                                                                                                                                                                                                                                                                                                                                                                                                                                                                                                                                                                                                                                                                                                                                                                                                                                                                                                                                                                                                                                                                                                                                                                                                                                                                                                                                                                                                                                                                                                                                                                                                                                                                                                                                                                                                                                                                                                                                                                                                                                                                                                                                                                                                                                                                                                                                                                                                                                                                                                                                                                                                                                                                                                                                                                                                                                                                                                                                                                                                                                                                                                                                                                                                                                                                                                                                                                                                                                                                                                                                                                                                                                                                                                                                                                                                                                                                                                                                                                                                                                                                                                                                                                                                                                                                                                                                                                                                                                                                                                                                                                                                                                                                                                                                                                                                                                                                                                                                                                                                                                                                                                                                                                                                                                                                                                                                                                                                                                                                                                                                                                                                                                                                                                                                                                                                                                                                                                                                                                                                                            |
| EIF3J       | 0.531  | 0.0107  | 208985_s_at  | eukaryotic translation initiation factor 3, subunit J                                                                                                                                                                                                                                                                                                                                                                                                                                                                                                                                                                                                                                                                                                                                                                                                                                                                                                                                                                                                                                                                                                                                                                                                                                                                                                                                                                                                                                                                                                                                                                                                                                                                                                                                                                                                                                                                                                                                                                                                                                                                                                                                                                                                                                                                                                                                                                                                                                                                                                                                                                                                                                                                                                                                                                                                                                                                                                                                                                                                                                                                                                                                                                                                                                                                                                                                                                                                                                                                                                                                                                                                                                                                                                                                                                                                                                                                                                                                                                                                                                                                                                                                                                                                                                                                                                                                                                                                                                                                                                                                                                                                                                                                                                                                                                                                                                                                                                                                                                                                                                                                                                                                                                                                                                                                                                                                                                                                                                                                                                                                                                                                                                                                                                                                                                                                                                                                                                                                                                                                                                                                                                                                                                                                                                                                                                                                                                                                                                                                                                                                                                                                                                                                                                                                                                                                                                                                                                                                                                                                                                                                                                                                                                                                                                                                                                                                                                                                                                                                                                                                                                                                                                                                                                                                                                                                                                                                                                                                                                                                                                                                                                                                                                                                                                                                                                                                                                                                                                                                                                                                                                                                                                                                                                                                                                                                                                                                                                                                                                                                                                                                                                                                                                                                                                                                                                                                                                                                                                                                                                                                                                                                                                                                                                                                                                                                                                                                                                                                                                                                                                                                                                                                                                                                                                                                                                                                                                                                                                                                                                                                                                                                                                                                                                                                                                                                                                                                                                                                                                                                                                                                                                                                                                                                                                                                                                                                                                                                                                                                                                                                                                                                                                                                                                                                                                                                                                                                                                                                                                                                                                                                                                                                                                                                                                                                                                                                                                                                                                                                                                                                                                                                                                                                                                                                                                                                                                                                                                                                                                                                                                                                                                                                                                                                                                                                                                                                                                                                                                                                                                                                                                                                                                                                                                                                                                                                                                                                                                                                                                                                                                                                                                                                                                                                                                                                                                                                                                                                                                                                                                                                                                                                                                                                                                                                                                                                                                                                                                                                                                                                                                                                                                                                                                                                                                                                                                                                                                                                                                                                                                                                                                                                                                                                                                                                                                                                                                                                                                                                                                                                                                                                                                                                                                                                                                                                                                                                                                                                                                                                                                                                                                                                                                                                                                                                                                                                                                                                                                                                                                                                                                                                                                                                                                                                                                                                                                                                                                                                                                                                                                                                                                                                                                                                                                                                                                                                                                                                                                                                                                                                                                                                                                                                                                                                                                                                                                                                                                                                                                                                                                                                                                                                                                                                                                                                                                                                                                                                                                                                                                                                                                                                                                                                                                                                                                                                                                                                                                                                                                                                                                                                                                                                                                                                                                                                                                                                                                                                                                                                                                                                                                                                                                                                                                                                                                                                                                                                                                                                                                                                                                                                                                                                                                                                                                                         |
| FEN1        | 1.548  | 0.0108  | 204767_s_at  | flap structure-specific endonuclease 1                                                                                                                                                                                                                                                                                                                                                                                                                                                                                                                                                                                                                                                                                                                                                                                                                                                                                                                                                                                                                                                                                                                                                                                                                                                                                                                                                                                                                                                                                                                                                                                                                                                                                                                                                                                                                                                                                                                                                                                                                                                                                                                                                                                                                                                                                                                                                                                                                                                                                                                                                                                                                                                                                                                                                                                                                                                                                                                                                                                                                                                                                                                                                                                                                                                                                                                                                                                                                                                                                                                                                                                                                                                                                                                                                                                                                                                                                                                                                                                                                                                                                                                                                                                                                                                                                                                                                                                                                                                                                                                                                                                                                                                                                                                                                                                                                                                                                                                                                                                                                                                                                                                                                                                                                                                                                                                                                                                                                                                                                                                                                                                                                                                                                                                                                                                                                                                                                                                                                                                                                                                                                                                                                                                                                                                                                                                                                                                                                                                                                                                                                                                                                                                                                                                                                                                                                                                                                                                                                                                                                                                                                                                                                                                                                                                                                                                                                                                                                                                                                                                                                                                                                                                                                                                                                                                                                                                                                                                                                                                                                                                                                                                                                                                                                                                                                                                                                                                                                                                                                                                                                                                                                                                                                                                                                                                                                                                                                                                                                                                                                                                                                                                                                                                                                                                                                                                                                                                                                                                                                                                                                                                                                                                                                                                                                                                                                                                                                                                                                                                                                                                                                                                                                                                                                                                                                                                                                                                                                                                                                                                                                                                                                                                                                                                                                                                                                                                                                                                                                                                                                                                                                                                                                                                                                                                                                                                                                                                                                                                                                                                                                                                                                                                                                                                                                                                                                                                                                                                                                                                                                                                                                                                                                                                                                                                                                                                                                                                                                                                                                                                                                                                                                                                                                                                                                                                                                                                                                                                                                                                                                                                                                                                                                                                                                                                                                                                                                                                                                                                                                                                                                                                                                                                                                                                                                                                                                                                                                                                                                                                                                                                                                                                                                                                                                                                                                                                                                                                                                                                                                                                                                                                                                                                                                                                                                                                                                                                                                                                                                                                                                                                                                                                                                                                                                                                                                                                                                                                                                                                                                                                                                                                                                                                                                                                                                                                                                                                                                                                                                                                                                                                                                                                                                                                                                                                                                                                                                                                                                                                                                                                                                                                                                                                                                                                                                                                                                                                                                                                                                                                                                                                                                                                                                                                                                                                                                                                                                                                                                                                                                                                                                                                                                                                                                                                                                                                                                                                                                                                                                                                                                                                                                                                                                                                                                                                                                                                                                                                                                                                                                                                                                                                                                                                                                                                                                                                                                                                                                                                                                                                                                                                                                                                                                                                                                                                                                                                                                                                                                                                                                                                                                                                                                                                                                                                                                                                                                                                                                                                                                                                                                                                                                                                                                                                                                                                                                                                                                                                                                                                                                                                                                                                                                                                                                                                                        |
| YIPF5       | 0.668  | 0.0109  | 224953_at    | Yip1 domain family, member 5                                                                                                                                                                                                                                                                                                                                                                                                                                                                                                                                                                                                                                                                                                                                                                                                                                                                                                                                                                                                                                                                                                                                                                                                                                                                                                                                                                                                                                                                                                                                                                                                                                                                                                                                                                                                                                                                                                                                                                                                                                                                                                                                                                                                                                                                                                                                                                                                                                                                                                                                                                                                                                                                                                                                                                                                                                                                                                                                                                                                                                                                                                                                                                                                                                                                                                                                                                                                                                                                                                                                                                                                                                                                                                                                                                                                                                                                                                                                                                                                                                                                                                                                                                                                                                                                                                                                                                                                                                                                                                                                                                                                                                                                                                                                                                                                                                                                                                                                                                                                                                                                                                                                                                                                                                                                                                                                                                                                                                                                                                                                                                                                                                                                                                                                                                                                                                                                                                                                                                                                                                                                                                                                                                                                                                                                                                                                                                                                                                                                                                                                                                                                                                                                                                                                                                                                                                                                                                                                                                                                                                                                                                                                                                                                                                                                                                                                                                                                                                                                                                                                                                                                                                                                                                                                                                                                                                                                                                                                                                                                                                                                                                                                                                                                                                                                                                                                                                                                                                                                                                                                                                                                                                                                                                                                                                                                                                                                                                                                                                                                                                                                                                                                                                                                                                                                                                                                                                                                                                                                                                                                                                                                                                                                                                                                                                                                                                                                                                                                                                                                                                                                                                                                                                                                                                                                                                                                                                                                                                                                                                                                                                                                                                                                                                                                                                                                                                                                                                                                                                                                                                                                                                                                                                                                                                                                                                                                                                                                                                                                                                                                                                                                                                                                                                                                                                                                                                                                                                                                                                                                                                                                                                                                                                                                                                                                                                                                                                                                                                                                                                                                                                                                                                                                                                                                                                                                                                                                                                                                                                                                                                                                                                                                                                                                                                                                                                                                                                                                                                                                                                                                                                                                                                                                                                                                                                                                                                                                                                                                                                                                                                                                                                                                                                                                                                                                                                                                                                                                                                                                                                                                                                                                                                                                                                                                                                                                                                                                                                                                                                                                                                                                                                                                                                                                                                                                                                                                                                                                                                                                                                                                                                                                                                                                                                                                                                                                                                                                                                                                                                                                                                                                                                                                                                                                                                                                                                                                                                                                                                                                                                                                                                                                                                                                                                                                                                                                                                                                                                                                                                                                                                                                                                                                                                                                                                                                                                                                                                                                                                                                                                                                                                                                                                                                                                                                                                                                                                                                                                                                                                                                                                                                                                                                                                                                                                                                                                                                                                                                                                                                                                                                                                                                                                                                                                                                                                                                                                                                                                                                                                                                                                                                                                                                                                                                                                                                                                                                                                                                                                                                                                                                                                                                                                                                                                                                                                                                                                                                                                                                                                                                                                                                                                                                                                                                                                                                                                                                                                                                                                                                                                                                                                                                                                                                                                                                                  |
| RAMP3       | -2.521 | 0.0109  | 205326_at    | receptor (G protein-coupled) activity modifying protein 3                                                                                                                                                                                                                                                                                                                                                                                                                                                                                                                                                                                                                                                                                                                                                                                                                                                                                                                                                                                                                                                                                                                                                                                                                                                                                                                                                                                                                                                                                                                                                                                                                                                                                                                                                                                                                                                                                                                                                                                                                                                                                                                                                                                                                                                                                                                                                                                                                                                                                                                                                                                                                                                                                                                                                                                                                                                                                                                                                                                                                                                                                                                                                                                                                                                                                                                                                                                                                                                                                                                                                                                                                                                                                                                                                                                                                                                                                                                                                                                                                                                                                                                                                                                                                                                                                                                                                                                                                                                                                                                                                                                                                                                                                                                                                                                                                                                                                                                                                                                                                                                                                                                                                                                                                                                                                                                                                                                                                                                                                                                                                                                                                                                                                                                                                                                                                                                                                                                                                                                                                                                                                                                                                                                                                                                                                                                                                                                                                                                                                                                                                                                                                                                                                                                                                                                                                                                                                                                                                                                                                                                                                                                                                                                                                                                                                                                                                                                                                                                                                                                                                                                                                                                                                                                                                                                                                                                                                                                                                                                                                                                                                                                                                                                                                                                                                                                                                                                                                                                                                                                                                                                                                                                                                                                                                                                                                                                                                                                                                                                                                                                                                                                                                                                                                                                                                                                                                                                                                                                                                                                                                                                                                                                                                                                                                                                                                                                                                                                                                                                                                                                                                                                                                                                                                                                                                                                                                                                                                                                                                                                                                                                                                                                                                                                                                                                                                                                                                                                                                                                                                                                                                                                                                                                                                                                                                                                                                                                                                                                                                                                                                                                                                                                                                                                                                                                                                                                                                                                                                                                                                                                                                                                                                                                                                                                                                                                                                                                                                                                                                                                                                                                                                                                                                                                                                                                                                                                                                                                                                                                                                                                                                                                                                                                                                                                                                                                                                                                                                                                                                                                                                                                                                                                                                                                                                                                                                                                                                                                                                                                                                                                                                                                                                                                                                                                                                                                                                                                                                                                                                                                                                                                                                                                                                                                                                                                                                                                                                                                                                                                                                                                                                                                                                                                                                                                                                                                                                                                                                                                                                                                                                                                                                                                                                                                                                                                                                                                                                                                                                                                                                                                                                                                                                                                                                                                                                                                                                                                                                                                                                                                                                                                                                                                                                                                                                                                                                                                                                                                                                                                                                                                                                                                                                                                                                                                                                                                                                                                                                                                                                                                                                                                                                                                                                                                                                                                                                                                                                                                                                                                                                                                                                                                                                                                                                                                                                                                                                                                                                                                                                                                                                                                                                                                                                                                                                                                                                                                                                                                                                                                                                                                                                                                                                                                                                                                                                                                                                                                                                                                                                                                                                                                                                                                                                                                                                                                                                                                                                                                                                                                                                                                                                                                                                                                                                                                                                                                                                                                                                                                                                                                                                                                                                                                                                                                     |
| RFK         | 0.483  | 0.0109  | 203224_at    | riboflavin kinase                                                                                                                                                                                                                                                                                                                                                                                                                                                                                                                                                                                                                                                                                                                                                                                                                                                                                                                                                                                                                                                                                                                                                                                                                                                                                                                                                                                                                                                                                                                                                                                                                                                                                                                                                                                                                                                                                                                                                                                                                                                                                                                                                                                                                                                                                                                                                                                                                                                                                                                                                                                                                                                                                                                                                                                                                                                                                                                                                                                                                                                                                                                                                                                                                                                                                                                                                                                                                                                                                                                                                                                                                                                                                                                                                                                                                                                                                                                                                                                                                                                                                                                                                                                                                                                                                                                                                                                                                                                                                                                                                                                                                                                                                                                                                                                                                                                                                                                                                                                                                                                                                                                                                                                                                                                                                                                                                                                                                                                                                                                                                                                                                                                                                                                                                                                                                                                                                                                                                                                                                                                                                                                                                                                                                                                                                                                                                                                                                                                                                                                                                                                                                                                                                                                                                                                                                                                                                                                                                                                                                                                                                                                                                                                                                                                                                                                                                                                                                                                                                                                                                                                                                                                                                                                                                                                                                                                                                                                                                                                                                                                                                                                                                                                                                                                                                                                                                                                                                                                                                                                                                                                                                                                                                                                                                                                                                                                                                                                                                                                                                                                                                                                                                                                                                                                                                                                                                                                                                                                                                                                                                                                                                                                                                                                                                                                                                                                                                                                                                                                                                                                                                                                                                                                                                                                                                                                                                                                                                                                                                                                                                                                                                                                                                                                                                                                                                                                                                                                                                                                                                                                                                                                                                                                                                                                                                                                                                                                                                                                                                                                                                                                                                                                                                                                                                                                                                                                                                                                                                                                                                                                                                                                                                                                                                                                                                                                                                                                                                                                                                                                                                                                                                                                                                                                                                                                                                                                                                                                                                                                                                                                                                                                                                                                                                                                                                                                                                                                                                                                                                                                                                                                                                                                                                                                                                                                                                                                                                                                                                                                                                                                                                                                                                                                                                                                                                                                                                                                                                                                                                                                                                                                                                                                                                                                                                                                                                                                                                                                                                                                                                                                                                                                                                                                                                                                                                                                                                                                                                                                                                                                                                                                                                                                                                                                                                                                                                                                                                                                                                                                                                                                                                                                                                                                                                                                                                                                                                                                                                                                                                                                                                                                                                                                                                                                                                                                                                                                                                                                                                                                                                                                                                                                                                                                                                                                                                                                                                                                                                                                                                                                                                                                                                                                                                                                                                                                                                                                                                                                                                                                                                                                                                                                                                                                                                                                                                                                                                                                                                                                                                                                                                                                                                                                                                                                                                                                                                                                                                                                                                                                                                                                                                                                                                                                                                                                                                                                                                                                                                                                                                                                                                                                                                                                                                                                                                                                                                                                                                                                                                                                                                                                                                                                                                                                                                                                                                                                                                                                                                                                                                                                                                                                                                                                                                                                                                             |
| MEIS1       | -2.07  | 0.011   | 1559477_s_at | Meis homeobox 1                                                                                                                                                                                                                                                                                                                                                                                                                                                                                                                                                                                                                                                                                                                                                                                                                                                                                                                                                                                                                                                                                                                                                                                                                                                                                                                                                                                                                                                                                                                                                                                                                                                                                                                                                                                                                                                                                                                                                                                                                                                                                                                                                                                                                                                                                                                                                                                                                                                                                                                                                                                                                                                                                                                                                                                                                                                                                                                                                                                                                                                                                                                                                                                                                                                                                                                                                                                                                                                                                                                                                                                                                                                                                                                                                                                                                                                                                                                                                                                                                                                                                                                                                                                                                                                                                                                                                                                                                                                                                                                                                                                                                                                                                                                                                                                                                                                                                                                                                                                                                                                                                                                                                                                                                                                                                                                                                                                                                                                                                                                                                                                                                                                                                                                                                                                                                                                                                                                                                                                                                                                                                                                                                                                                                                                                                                                                                                                                                                                                                                                                                                                                                                                                                                                                                                                                                                                                                                                                                                                                                                                                                                                                                                                                                                                                                                                                                                                                                                                                                                                                                                                                                                                                                                                                                                                                                                                                                                                                                                                                                                                                                                                                                                                                                                                                                                                                                                                                                                                                                                                                                                                                                                                                                                                                                                                                                                                                                                                                                                                                                                                                                                                                                                                                                                                                                                                                                                                                                                                                                                                                                                                                                                                                                                                                                                                                                                                                                                                                                                                                                                                                                                                                                                                                                                                                                                                                                                                                                                                                                                                                                                                                                                                                                                                                                                                                                                                                                                                                                                                                                                                                                                                                                                                                                                                                                                                                                                                                                                                                                                                                                                                                                                                                                                                                                                                                                                                                                                                                                                                                                                                                                                                                                                                                                                                                                                                                                                                                                                                                                                                                                                                                                                                                                                                                                                                                                                                                                                                                                                                                                                                                                                                                                                                                                                                                                                                                                                                                                                                                                                                                                                                                                                                                                                                                                                                                                                                                                                                                                                                                                                                                                                                                                                                                                                                                                                                                                                                                                                                                                                                                                                                                                                                                                                                                                                                                                                                                                                                                                                                                                                                                                                                                                                                                                                                                                                                                                                                                                                                                                                                                                                                                                                                                                                                                                                                                                                                                                                                                                                                                                                                                                                                                                                                                                                                                                                                                                                                                                                                                                                                                                                                                                                                                                                                                                                                                                                                                                                                                                                                                                                                                                                                                                                                                                                                                                                                                                                                                                                                                                                                                                                                                                                                                                                                                                                                                                                                                                                                                                                                                                                                                                                                                                                                                                                                                                                                                                                                                                                                                                                                                                                                                                                                                                                                                                                                                                                                                                                                                                                                                                                                                                                                                                                                                                                                                                                                                                                                                                                                                                                                                                                                                                                                                                                                                                                                                                                                                                                                                                                                                                                                                                                                                                                                                                                                                                                                                                                                                                                                                                                                                                                                                                                                                                                                                                               |
| JTB         | 0.571  | 0.011   | 200048_s_at  | jumping translocation breakpoint                                                                                                                                                                                                                                                                                                                                                                                                                                                                                                                                                                                                                                                                                                                                                                                                                                                                                                                                                                                                                                                                                                                                                                                                                                                                                                                                                                                                                                                                                                                                                                                                                                                                                                                                                                                                                                                                                                                                                                                                                                                                                                                                                                                                                                                                                                                                                                                                                                                                                                                                                                                                                                                                                                                                                                                                                                                                                                                                                                                                                                                                                                                                                                                                                                                                                                                                                                                                                                                                                                                                                                                                                                                                                                                                                                                                                                                                                                                                                                                                                                                                                                                                                                                                                                                                                                                                                                                                                                                                                                                                                                                                                                                                                                                                                                                                                                                                                                                                                                                                                                                                                                                                                                                                                                                                                                                                                                                                                                                                                                                                                                                                                                                                                                                                                                                                                                                                                                                                                                                                                                                                                                                                                                                                                                                                                                                                                                                                                                                                                                                                                                                                                                                                                                                                                                                                                                                                                                                                                                                                                                                                                                                                                                                                                                                                                                                                                                                                                                                                                                                                                                                                                                                                                                                                                                                                                                                                                                                                                                                                                                                                                                                                                                                                                                                                                                                                                                                                                                                                                                                                                                                                                                                                                                                                                                                                                                                                                                                                                                                                                                                                                                                                                                                                                                                                                                                                                                                                                                                                                                                                                                                                                                                                                                                                                                                                                                                                                                                                                                                                                                                                                                                                                                                                                                                                                                                                                                                                                                                                                                                                                                                                                                                                                                                                                                                                                                                                                                                                                                                                                                                                                                                                                                                                                                                                                                                                                                                                                                                                                                                                                                                                                                                                                                                                                                                                                                                                                                                                                                                                                                                                                                                                                                                                                                                                                                                                                                                                                                                                                                                                                                                                                                                                                                                                                                                                                                                                                                                                                                                                                                                                                                                                                                                                                                                                                                                                                                                                                                                                                                                                                                                                                                                                                                                                                                                                                                                                                                                                                                                                                                                                                                                                                                                                                                                                                                                                                                                                                                                                                                                                                                                                                                                                                                                                                                                                                                                                                                                                                                                                                                                                                                                                                                                                                                                                                                                                                                                                                                                                                                                                                                                                                                                                                                                                                                                                                                                                                                                                                                                                                                                                                                                                                                                                                                                                                                                                                                                                                                                                                                                                                                                                                                                                                                                                                                                                                                                                                                                                                                                                                                                                                                                                                                                                                                                                                                                                                                                                                                                                                                                                                                                                                                                                                                                                                                                                                                                                                                                                                                                                                                                                                                                                                                                                                                                                                                                                                                                                                                                                                                                                                                                                                                                                                                                                                                                                                                                                                                                                                                                                                                                                                                                                                                                                                                                                                                                                                                                                                                                                                                                                                                                                                                                                                                                                                                                                                                                                                                                                                                                                                                                                                                                                                                                                                                                                                                                                                                                                                                                                                                                                                                                                                                                                                                                                              |
| RSRC1       | 1.098  | 0.011   | 1555501_s_at | arginine/serine-rich coiled-coil 1                                                                                                                                                                                                                                                                                                                                                                                                                                                                                                                                                                                                                                                                                                                                                                                                                                                                                                                                                                                                                                                                                                                                                                                                                                                                                                                                                                                                                                                                                                                                                                                                                                                                                                                                                                                                                                                                                                                                                                                                                                                                                                                                                                                                                                                                                                                                                                                                                                                                                                                                                                                                                                                                                                                                                                                                                                                                                                                                                                                                                                                                                                                                                                                                                                                                                                                                                                                                                                                                                                                                                                                                                                                                                                                                                                                                                                                                                                                                                                                                                                                                                                                                                                                                                                                                                                                                                                                                                                                                                                                                                                                                                                                                                                                                                                                                                                                                                                                                                                                                                                                                                                                                                                                                                                                                                                                                                                                                                                                                                                                                                                                                                                                                                                                                                                                                                                                                                                                                                                                                                                                                                                                                                                                                                                                                                                                                                                                                                                                                                                                                                                                                                                                                                                                                                                                                                                                                                                                                                                                                                                                                                                                                                                                                                                                                                                                                                                                                                                                                                                                                                                                                                                                                                                                                                                                                                                                                                                                                                                                                                                                                                                                                                                                                                                                                                                                                                                                                                                                                                                                                                                                                                                                                                                                                                                                                                                                                                                                                                                                                                                                                                                                                                                                                                                                                                                                                                                                                                                                                                                                                                                                                                                                                                                                                                                                                                                                                                                                                                                                                                                                                                                                                                                                                                                                                                                                                                                                                                                                                                                                                                                                                                                                                                                                                                                                                                                                                                                                                                                                                                                                                                                                                                                                                                                                                                                                                                                                                                                                                                                                                                                                                                                                                                                                                                                                                                                                                                                                                                                                                                                                                                                                                                                                                                                                                                                                                                                                                                                                                                                                                                                                                                                                                                                                                                                                                                                                                                                                                                                                                                                                                                                                                                                                                                                                                                                                                                                                                                                                                                                                                                                                                                                                                                                                                                                                                                                                                                                                                                                                                                                                                                                                                                                                                                                                                                                                                                                                                                                                                                                                                                                                                                                                                                                                                                                                                                                                                                                                                                                                                                                                                                                                                                                                                                                                                                                                                                                                                                                                                                                                                                                                                                                                                                                                                                                                                                                                                                                                                                                                                                                                                                                                                                                                                                                                                                                                                                                                                                                                                                                                                                                                                                                                                                                                                                                                                                                                                                                                                                                                                                                                                                                                                                                                                                                                                                                                                                                                                                                                                                                                                                                                                                                                                                                                                                                                                                                                                                                                                                                                                                                                                                                                                                                                                                                                                                                                                                                                                                                                                                                                                                                                                                                                                                                                                                                                                                                                                                                                                                                                                                                                                                                                                                                                                                                                                                                                                                                                                                                                                                                                                                                                                                                                                                                                                                                                                                                                                                                                                                                                                                                                                                                                                                                                                                                                                                                                                                                                                                                                                                                                                                                                                                                                                                                                                            |
| TBL2        | 0.851  | 0.011   | 212685_s_at  | transducin (beta)-like 2                                                                                                                                                                                                                                                                                                                                                                                                                                                                                                                                                                                                                                                                                                                                                                                                                                                                                                                                                                                                                                                                                                                                                                                                                                                                                                                                                                                                                                                                                                                                                                                                                                                                                                                                                                                                                                                                                                                                                                                                                                                                                                                                                                                                                                                                                                                                                                                                                                                                                                                                                                                                                                                                                                                                                                                                                                                                                                                                                                                                                                                                                                                                                                                                                                                                                                                                                                                                                                                                                                                                                                                                                                                                                                                                                                                                                                                                                                                                                                                                                                                                                                                                                                                                                                                                                                                                                                                                                                                                                                                                                                                                                                                                                                                                                                                                                                                                                                                                                                                                                                                                                                                                                                                                                                                                                                                                                                                                                                                                                                                                                                                                                                                                                                                                                                                                                                                                                                                                                                                                                                                                                                                                                                                                                                                                                                                                                                                                                                                                                                                                                                                                                                                                                                                                                                                                                                                                                                                                                                                                                                                                                                                                                                                                                                                                                                                                                                                                                                                                                                                                                                                                                                                                                                                                                                                                                                                                                                                                                                                                                                                                                                                                                                                                                                                                                                                                                                                                                                                                                                                                                                                                                                                                                                                                                                                                                                                                                                                                                                                                                                                                                                                                                                                                                                                                                                                                                                                                                                                                                                                                                                                                                                                                                                                                                                                                                                                                                                                                                                                                                                                                                                                                                                                                                                                                                                                                                                                                                                                                                                                                                                                                                                                                                                                                                                                                                                                                                                                                                                                                                                                                                                                                                                                                                                                                                                                                                                                                                                                                                                                                                                                                                                                                                                                                                                                                                                                                                                                                                                                                                                                                                                                                                                                                                                                                                                                                                                                                                                                                                                                                                                                                                                                                                                                                                                                                                                                                                                                                                                                                                                                                                                                                                                                                                                                                                                                                                                                                                                                                                                                                                                                                                                                                                                                                                                                                                                                                                                                                                                                                                                                                                                                                                                                                                                                                                                                                                                                                                                                                                                                                                                                                                                                                                                                                                                                                                                                                                                                                                                                                                                                                                                                                                                                                                                                                                                                                                                                                                                                                                                                                                                                                                                                                                                                                                                                                                                                                                                                                                                                                                                                                                                                                                                                                                                                                                                                                                                                                                                                                                                                                                                                                                                                                                                                                                                                                                                                                                                                                                                                                                                                                                                                                                                                                                                                                                                                                                                                                                                                                                                                                                                                                                                                                                                                                                                                                                                                                                                                                                                                                                                                                                                                                                                                                                                                                                                                                                                                                                                                                                                                                                                                                                                                                                                                                                                                                                                                                                                                                                                                                                                                                                                                                                                                                                                                                                                                                                                                                                                                                                                                                                                                                                                                                                                                                                                                                                                                                                                                                                                                                                                                                                                                                                                                                                                                                                                                                                                                                                                                                                                                                                                                                                                                                                                                                                      |
| CXCL2       | -4.114 | 0.011   | 209774_x_at  | chemokine (C-X-C motif) ligand 2                                                                                                                                                                                                                                                                                                                                                                                                                                                                                                                                                                                                                                                                                                                                                                                                                                                                                                                                                                                                                                                                                                                                                                                                                                                                                                                                                                                                                                                                                                                                                                                                                                                                                                                                                                                                                                                                                                                                                                                                                                                                                                                                                                                                                                                                                                                                                                                                                                                                                                                                                                                                                                                                                                                                                                                                                                                                                                                                                                                                                                                                                                                                                                                                                                                                                                                                                                                                                                                                                                                                                                                                                                                                                                                                                                                                                                                                                                                                                                                                                                                                                                                                                                                                                                                                                                                                                                                                                                                                                                                                                                                                                                                                                                                                                                                                                                                                                                                                                                                                                                                                                                                                                                                                                                                                                                                                                                                                                                                                                                                                                                                                                                                                                                                                                                                                                                                                                                                                                                                                                                                                                                                                                                                                                                                                                                                                                                                                                                                                                                                                                                                                                                                                                                                                                                                                                                                                                                                                                                                                                                                                                                                                                                                                                                                                                                                                                                                                                                                                                                                                                                                                                                                                                                                                                                                                                                                                                                                                                                                                                                                                                                                                                                                                                                                                                                                                                                                                                                                                                                                                                                                                                                                                                                                                                                                                                                                                                                                                                                                                                                                                                                                                                                                                                                                                                                                                                                                                                                                                                                                                                                                                                                                                                                                                                                                                                                                                                                                                                                                                                                                                                                                                                                                                                                                                                                                                                                                                                                                                                                                                                                                                                                                                                                                                                                                                                                                                                                                                                                                                                                                                                                                                                                                                                                                                                                                                                                                                                                                                                                                                                                                                                                                                                                                                                                                                                                                                                                                                                                                                                                                                                                                                                                                                                                                                                                                                                                                                                                                                                                                                                                                                                                                                                                                                                                                                                                                                                                                                                                                                                                                                                                                                                                                                                                                                                                                                                                                                                                                                                                                                                                                                                                                                                                                                                                                                                                                                                                                                                                                                                                                                                                                                                                                                                                                                                                                                                                                                                                                                                                                                                                                                                                                                                                                                                                                                                                                                                                                                                                                                                                                                                                                                                                                                                                                                                                                                                                                                                                                                                                                                                                                                                                                                                                                                                                                                                                                                                                                                                                                                                                                                                                                                                                                                                                                                                                                                                                                                                                                                                                                                                                                                                                                                                                                                                                                                                                                                                                                                                                                                                                                                                                                                                                                                                                                                                                                                                                                                                                                                                                                                                                                                                                                                                                                                                                                                                                                                                                                                                                                                                                                                                                                                                                                                                                                                                                                                                                                                                                                                                                                                                                                                                                                                                                                                                                                                                                                                                                                                                                                                                                                                                                                                                                                                                                                                                                                                                                                                                                                                                                                                                                                                                                                                                                                                                                                                                                                                                                                                                                                                                                                                                                                                                                                                                                                                                                                                                                                                                                                                                                                                                                                                                                                                                                                                              |
| TTC14       | 0.659  | 0.011   | 225178_at    | tetratricopeptide repeat domain 14                                                                                                                                                                                                                                                                                                                                                                                                                                                                                                                                                                                                                                                                                                                                                                                                                                                                                                                                                                                                                                                                                                                                                                                                                                                                                                                                                                                                                                                                                                                                                                                                                                                                                                                                                                                                                                                                                                                                                                                                                                                                                                                                                                                                                                                                                                                                                                                                                                                                                                                                                                                                                                                                                                                                                                                                                                                                                                                                                                                                                                                                                                                                                                                                                                                                                                                                                                                                                                                                                                                                                                                                                                                                                                                                                                                                                                                                                                                                                                                                                                                                                                                                                                                                                                                                                                                                                                                                                                                                                                                                                                                                                                                                                                                                                                                                                                                                                                                                                                                                                                                                                                                                                                                                                                                                                                                                                                                                                                                                                                                                                                                                                                                                                                                                                                                                                                                                                                                                                                                                                                                                                                                                                                                                                                                                                                                                                                                                                                                                                                                                                                                                                                                                                                                                                                                                                                                                                                                                                                                                                                                                                                                                                                                                                                                                                                                                                                                                                                                                                                                                                                                                                                                                                                                                                                                                                                                                                                                                                                                                                                                                                                                                                                                                                                                                                                                                                                                                                                                                                                                                                                                                                                                                                                                                                                                                                                                                                                                                                                                                                                                                                                                                                                                                                                                                                                                                                                                                                                                                                                                                                                                                                                                                                                                                                                                                                                                                                                                                                                                                                                                                                                                                                                                                                                                                                                                                                                                                                                                                                                                                                                                                                                                                                                                                                                                                                                                                                                                                                                                                                                                                                                                                                                                                                                                                                                                                                                                                                                                                                                                                                                                                                                                                                                                                                                                                                                                                                                                                                                                                                                                                                                                                                                                                                                                                                                                                                                                                                                                                                                                                                                                                                                                                                                                                                                                                                                                                                                                                                                                                                                                                                                                                                                                                                                                                                                                                                                                                                                                                                                                                                                                                                                                                                                                                                                                                                                                                                                                                                                                                                                                                                                                                                                                                                                                                                                                                                                                                                                                                                                                                                                                                                                                                                                                                                                                                                                                                                                                                                                                                                                                                                                                                                                                                                                                                                                                                                                                                                                                                                                                                                                                                                                                                                                                                                                                                                                                                                                                                                                                                                                                                                                                                                                                                                                                                                                                                                                                                                                                                                                                                                                                                                                                                                                                                                                                                                                                                                                                                                                                                                                                                                                                                                                                                                                                                                                                                                                                                                                                                                                                                                                                                                                                                                                                                                                                                                                                                                                                                                                                                                                                                                                                                                                                                                                                                                                                                                                                                                                                                                                                                                                                                                                                                                                                                                                                                                                                                                                                                                                                                                                                                                                                                                                                                                                                                                                                                                                                                                                                                                                                                                                                                                                                                                                                                                                                                                                                                                                                                                                                                                                                                                                                                                                                                                                                                                                                                                                                                                                                                                                                                                                                                                                                                                                                                            |
| SIPAL1L     | 1.065  | 0.011   | 202255_s_at  | signal-induced proliferation-associated 1 like 1                                                                                                                                                                                                                                                                                                                                                                                                                                                                                                                                                                                                                                                                                                                                                                                                                                                                                                                                                                                                                                                                                                                                                                                                                                                                                                                                                                                                                                                                                                                                                                                                                                                                                                                                                                                                                                                                                                                                                                                                                                                                                                                                                                                                                                                                                                                                                                                                                                                                                                                                                                                                                                                                                                                                                                                                                                                                                                                                                                                                                                                                                                                                                                                                                                                                                                                                                                                                                                                                                                                                                                                                                                                                                                                                                                                                                                                                                                                                                                                                                                                                                                                                                                                                                                                                                                                                                                                                                                                                                                                                                                                                                                                                                                                                                                                                                                                                                                                                                                                                                                                                                                                                                                                                                                                                                                                                                                                                                                                                                                                                                                                                                                                                                                                                                                                                                                                                                                                                                                                                                                                                                                                                                                                                                                                                                                                                                                                                                                                                                                                                                                                                                                                                                                                                                                                                                                                                                                                                                                                                                                                                                                                                                                                                                                                                                                                                                                                                                                                                                                                                                                                                                                                                                                                                                                                                                                                                                                                                                                                                                                                                                                                                                                                                                                                                                                                                                                                                                                                                                                                                                                                                                                                                                                                                                                                                                                                                                                                                                                                                                                                                                                                                                                                                                                                                                                                                                                                                                                                                                                                                                                                                                                                                                                                                                                                                                                                                                                                                                                                                                                                                                                                                                                                                                                                                                                                                                                                                                                                                                                                                                                                                                                                                                                                                                                                                                                                                                                                                                                                                                                                                                                                                                                                                                                                                                                                                                                                                                                                                                                                                                                                                                                                                                                                                                                                                                                                                                                                                                                                                                                                                                                                                                                                                                                                                                                                                                                                                                                                                                                                                                                                                                                                                                                                                                                                                                                                                                                                                                                                                                                                                                                                                                                                                                                                                                                                                                                                                                                                                                                                                                                                                                                                                                                                                                                                                                                                                                                                                                                                                                                                                                                                                                                                                                                                                                                                                                                                                                                                                                                                                                                                                                                                                                                                                                                                                                                                                                                                                                                                                                                                                                                                                                                                                                                                                                                                                                                                                                                                                                                                                                                                                                                                                                                                                                                                                                                                                                                                                                                                                                                                                                                                                                                                                                                                                                                                                                                                                                                                                                                                                                                                                                                                                                                                                                                                                                                                                                                                                                                                                                                                                                                                                                                                                                                                                                                                                                                                                                                                                                                                                                                                                                                                                                                                                                                                                                                                                                                                                                                                                                                                                                                                                                                                                                                                                                                                                                                                                                                                                                                                                                                                                                                                                                                                                                                                                                                                                                                                                                                                                                                                                                                                                                                                                                                                                                                                                                                                                                                                                                                                                                                                                                                                                                                                                                                                                                                                                                                                                                                                                                                                                                                                                                                                                                                                                                                                                                                                                                                                                                                                                                                                                                                                                                                                              |
| E2F7        | 2.341  | 0.011   | 228033_at    | E2F transcription factor 7                                                                                                                                                                                                                                                                                                                                                                                                                                                                                                                                                                                                                                                                                                                                                                                                                                                                                                                                                                                                                                                                                                                                                                                                                                                                                                                                                                                                                                                                                                                                                                                                                                                                                                                                                                                                                                                                                                                                                                                                                                                                                                                                                                                                                                                                                                                                                                                                                                                                                                                                                                                                                                                                                                                                                                                                                                                                                                                                                                                                                                                                                                                                                                                                                                                                                                                                                                                                                                                                                                                                                                                                                                                                                                                                                                                                                                                                                                                                                                                                                                                                                                                                                                                                                                                                                                                                                                                                                                                                                                                                                                                                                                                                                                                                                                                                                                                                                                                                                                                                                                                                                                                                                                                                                                                                                                                                                                                                                                                                                                                                                                                                                                                                                                                                                                                                                                                                                                                                                                                                                                                                                                                                                                                                                                                                                                                                                                                                                                                                                                                                                                                                                                                                                                                                                                                                                                                                                                                                                                                                                                                                                                                                                                                                                                                                                                                                                                                                                                                                                                                                                                                                                                                                                                                                                                                                                                                                                                                                                                                                                                                                                                                                                                                                                                                                                                                                                                                                                                                                                                                                                                                                                                                                                                                                                                                                                                                                                                                                                                                                                                                                                                                                                                                                                                                                                                                                                                                                                                                                                                                                                                                                                                                                                                                                                                                                                                                                                                                                                                                                                                                                                                                                                                                                                                                                                                                                                                                                                                                                                                                                                                                                                                                                                                                                                                                                                                                                                                                                                                                                                                                                                                                                                                                                                                                                                                                                                                                                                                                                                                                                                                                                                                                                                                                                                                                                                                                                                                                                                                                                                                                                                                                                                                                                                                                                                                                                                                                                                                                                                                                                                                                                                                                                                                                                                                                                                                                                                                                                                                                                                                                                                                                                                                                                                                                                                                                                                                                                                                                                                                                                                                                                                                                                                                                                                                                                                                                                                                                                                                                                                                                                                                                                                                                                                                                                                                                                                                                                                                                                                                                                                                                                                                                                                                                                                                                                                                                                                                                                                                                                                                                                                                                                                                                                                                                                                                                                                                                                                                                                                                                                                                                                                                                                                                                                                                                                                                                                                                                                                                                                                                                                                                                                                                                                                                                                                                                                                                                                                                                                                                                                                                                                                                                                                                                                                                                                                                                                                                                                                                                                                                                                                                                                                                                                                                                                                                                                                                                                                                                                                                                                                                                                                                                                                                                                                                                                                                                                                                                                                                                                                                                                                                                                                                                                                                                                                                                                                                                                                                                                                                                                                                                                                                                                                                                                                                                                                                                                                                                                                                                                                                                                                                                                                                                                                                                                                                                                                                                                                                                                                                                                                                                                                                                                                                                                                                                                                                                                                                                                                                                                                                                                                                                                                                                                                                                                                                                                                                                                                                                                                                                                                                                                                                                                                                                                                    |
| CCDC146     | -1.154 | 0.011   | 227091_at    | coiled-coil domain containing 146                                                                                                                                                                                                                                                                                                                                                                                                                                                                                                                                                                                                                                                                                                                                                                                                                                                                                                                                                                                                                                                                                                                                                                                                                                                                                                                                                                                                                                                                                                                                                                                                                                                                                                                                                                                                                                                                                                                                                                                                                                                                                                                                                                                                                                                                                                                                                                                                                                                                                                                                                                                                                                                                                                                                                                                                                                                                                                                                                                                                                                                                                                                                                                                                                                                                                                                                                                                                                                                                                                                                                                                                                                                                                                                                                                                                                                                                                                                                                                                                                                                                                                                                                                                                                                                                                                                                                                                                                                                                                                                                                                                                                                                                                                                                                                                                                                                                                                                                                                                                                                                                                                                                                                                                                                                                                                                                                                                                                                                                                                                                                                                                                                                                                                                                                                                                                                                                                                                                                                                                                                                                                                                                                                                                                                                                                                                                                                                                                                                                                                                                                                                                                                                                                                                                                                                                                                                                                                                                                                                                                                                                                                                                                                                                                                                                                                                                                                                                                                                                                                                                                                                                                                                                                                                                                                                                                                                                                                                                                                                                                                                                                                                                                                                                                                                                                                                                                                                                                                                                                                                                                                                                                                                                                                                                                                                                                                                                                                                                                                                                                                                                                                                                                                                                                                                                                                                                                                                                                                                                                                                                                                                                                                                                                                                                                                                                                                                                                                                                                                                                                                                                                                                                                                                                                                                                                                                                                                                                                                                                                                                                                                                                                                                                                                                                                                                                                                                                                                                                                                                                                                                                                                                                                                                                                                                                                                                                                                                                                                                                                                                                                                                                                                                                                                                                                                                                                                                                                                                                                                                                                                                                                                                                                                                                                                                                                                                                                                                                                                                                                                                                                                                                                                                                                                                                                                                                                                                                                                                                                                                                                                                                                                                                                                                                                                                                                                                                                                                                                                                                                                                                                                                                                                                                                                                                                                                                                                                                                                                                                                                                                                                                                                                                                                                                                                                                                                                                                                                                                                                                                                                                                                                                                                                                                                                                                                                                                                                                                                                                                                                                                                                                                                                                                                                                                                                                                                                                                                                                                                                                                                                                                                                                                                                                                                                                                                                                                                                                                                                                                                                                                                                                                                                                                                                                                                                                                                                                                                                                                                                                                                                                                                                                                                                                                                                                                                                                                                                                                                                                                                                                                                                                                                                                                                                                                                                                                                                                                                                                                                                                                                                                                                                                                                                                                                                                                                                                                                                                                                                                                                                                                                                                                                                                                                                                                                                                                                                                                                                                                                                                                                                                                                                                                                                                                                                                                                                                                                                                                                                                                                                                                                                                                                                                                                                                                                                                                                                                                                                                                                                                                                                                                                                                                                                                                                                                                                                                                                                                                                                                                                                                                                                                                                                                                                                                                                                                                                                                                                                                                                                                                                                                                                                                                                                                                                                                             |
| SSBP1       | 0.833  | 0.0111  | 202591_s_at  | microRNA 5096 /// single-stranded DNA binding protein 1, mitochondrial                                                                                                                                                                                                                                                                                                                                                                                                                                                                                                                                                                                                                                                                                                                                                                                                                                                                                                                                                                                                                                                                                                                                                                                                                                                                                                                                                                                                                                                                                                                                                                                                                                                                                                                                                                                                                                                                                                                                                                                                                                                                                                                                                                                                                                                                                                                                                                                                                                                                                                                                                                                                                                                                                                                                                                                                                                                                                                                                                                                                                                                                                                                                                                                                                                                                                                                                                                                                                                                                                                                                                                                                                                                                                                                                                                                                                                                                                                                                                                                                                                                                                                                                                                                                                                                                                                                                                                                                                                                                                                                                                                                                                                                                                                                                                                                                                                                                                                                                                                                                                                                                                                                                                                                                                                                                                                                                                                                                                                                                                                                                                                                                                                                                                                                                                                                                                                                                                                                                                                                                                                                                                                                                                                                                                                                                                                                                                                                                                                                                                                                                                                                                                                                                                                                                                                                                                                                                                                                                                                                                                                                                                                                                                                                                                                                                                                                                                                                                                                                                                                                                                                                                                                                                                                                                                                                                                                                                                                                                                                                                                                                                                                                                                                                                                                                                                                                                                                                                                                                                                                                                                                                                                                                                                                                                                                                                                                                                                                                                                                                                                                                                                                                                                                                                                                                                                                                                                                                                                                                                                                                                                                                                                                                                                                                                                                                                                                                                                                                                                                                                                                                                                                                                                                                                                                                                                                                                                                                                                                                                                                                                                                                                                                                                                                                                                                                                                                                                                                                                                                                                                                                                                                                                                                                                                                                                                                                                                                                                                                                                                                                                                                                                                                                                                                                                                                                                                                                                                                                                                                                                                                                                                                                                                                                                                                                                                                                                                                                                                                                                                                                                                                                                                                                                                                                                                                                                                                                                                                                                                                                                                                                                                                                                                                                                                                                                                                                                                                                                                                                                                                                                                                                                                                                                                                                                                                                                                                                                                                                                                                                                                                                                                                                                                                                                                                                                                                                                                                                                                                                                                                                                                                                                                                                                                                                                                                                                                                                                                                                                                                                                                                                                                                                                                                                                                                                                                                                                                                                                                                                                                                                                                                                                                                                                                                                                                                                                                                                                                                                                                                                                                                                                                                                                                                                                                                                                                                                                                                                                                                                                                                                                                                                                                                                                                                                                                                                                                                                                                                                                                                                                                                                                                                                                                                                                                                                                                                                                                                                                                                                                                                                                                                                                                                                                                                                                                                                                                                                                                                                                                                                                                                                                                                                                                                                                                                                                                                                                                                                                                                                                                                                                                                                                                                                                                                                                                                                                                                                                                                                                                                                                                                                                                                                                                                                                                                                                                                                                                                                                                                                                                                                                                                                                                                                                                                                                                                                                                                                                                                                                                                                                                                                                                                                                                                                                                                                                                                                                                                                                                                                                                                                                                                                                                                                                                                        |
| CNPY2       | 0.89   | 0.0111  | 202857_at    | canopy 2 homolog (zebrafish)                                                                                                                                                                                                                                                                                                                                                                                                                                                                                                                                                                                                                                                                                                                                                                                                                                                                                                                                                                                                                                                                                                                                                                                                                                                                                                                                                                                                                                                                                                                                                                                                                                                                                                                                                                                                                                                                                                                                                                                                                                                                                                                                                                                                                                                                                                                                                                                                                                                                                                                                                                                                                                                                                                                                                                                                                                                                                                                                                                                                                                                                                                                                                                                                                                                                                                                                                                                                                                                                                                                                                                                                                                                                                                                                                                                                                                                                                                                                                                                                                                                                                                                                                                                                                                                                                                                                                                                                                                                                                                                                                                                                                                                                                                                                                                                                                                                                                                                                                                                                                                                                                                                                                                                                                                                                                                                                                                                                                                                                                                                                                                                                                                                                                                                                                                                                                                                                                                                                                                                                                                                                                                                                                                                                                                                                                                                                                                                                                                                                                                                                                                                                                                                                                                                                                                                                                                                                                                                                                                                                                                                                                                                                                                                                                                                                                                                                                                                                                                                                                                                                                                                                                                                                                                                                                                                                                                                                                                                                                                                                                                                                                                                                                                                                                                                                                                                                                                                                                                                                                                                                                                                                                                                                                                                                                                                                                                                                                                                                                                                                                                                                                                                                                                                                                                                                                                                                                                                                                                                                                                                                                                                                                                                                                                                                                                                                                                                                                                                                                                                                                                                                                                                                                                                                                                                                                                                                                                                                                                                                                                                                                                                                                                                                                                                                                                                                                                                                                                                                                                                                                                                                                                                                                                                                                                                                                                                                                                                                                                                                                                                                                                                                                                                                                                                                                                                                                                                                                                                                                                                                                                                                                                                                                                                                                                                                                                                                                                                                                                                                                                                                                                                                                                                                                                                                                                                                                                                                                                                                                                                                                                                                                                                                                                                                                                                                                                                                                                                                                                                                                                                                                                                                                                                                                                                                                                                                                                                                                                                                                                                                                                                                                                                                                                                                                                                                                                                                                                                                                                                                                                                                                                                                                                                                                                                                                                                                                                                                                                                                                                                                                                                                                                                                                                                                                                                                                                                                                                                                                                                                                                                                                                                                                                                                                                                                                                                                                                                                                                                                                                                                                                                                                                                                                                                                                                                                                                                                                                                                                                                                                                                                                                                                                                                                                                                                                                                                                                                                                                                                                                                                                                                                                                                                                                                                                                                                                                                                                                                                                                                                                                                                                                                                                                                                                                                                                                                                                                                                                                                                                                                                                                                                                                                                                                                                                                                                                                                                                                                                                                                                                                                                                                                                                                                                                                                                                                                                                                                                                                                                                                                                                                                                                                                                                                                                                                                                                                                                                                                                                                                                                                                                                                                                                                                                                                                                                                                                                                                                                                                                                                                                                                                                                                                                                                                                                                                                                                                                                                                                                                                                                                                                                                                                                                                                                                                                                  |
| C16orf87    | 1.214  | 0.0111  | 226608_at    | chromosome 16 open reading frame 87                                                                                                                                                                                                                                                                                                                                                                                                                                                                                                                                                                                                                                                                                                                                                                                                                                                                                                                                                                                                                                                                                                                                                                                                                                                                                                                                                                                                                                                                                                                                                                                                                                                                                                                                                                                                                                                                                                                                                                                                                                                                                                                                                                                                                                                                                                                                                                                                                                                                                                                                                                                                                                                                                                                                                                                                                                                                                                                                                                                                                                                                                                                                                                                                                                                                                                                                                                                                                                                                                                                                                                                                                                                                                                                                                                                                                                                                                                                                                                                                                                                                                                                                                                                                                                                                                                                                                                                                                                                                                                                                                                                                                                                                                                                                                                                                                                                                                                                                                                                                                                                                                                                                                                                                                                                                                                                                                                                                                                                                                                                                                                                                                                                                                                                                                                                                                                                                                                                                                                                                                                                                                                                                                                                                                                                                                                                                                                                                                                                                                                                                                                                                                                                                                                                                                                                                                                                                                                                                                                                                                                                                                                                                                                                                                                                                                                                                                                                                                                                                                                                                                                                                                                                                                                                                                                                                                                                                                                                                                                                                                                                                                                                                                                                                                                                                                                                                                                                                                                                                                                                                                                                                                                                                                                                                                                                                                                                                                                                                                                                                                                                                                                                                                                                                                                                                                                                                                                                                                                                                                                                                                                                                                                                                                                                                                                                                                                                                                                                                                                                                                                                                                                                                                                                                                                                                                                                                                                                                                                                                                                                                                                                                                                                                                                                                                                                                                                                                                                                                                                                                                                                                                                                                                                                                                                                                                                                                                                                                                                                                                                                                                                                                                                                                                                                                                                                                                                                                                                                                                                                                                                                                                                                                                                                                                                                                                                                                                                                                                                                                                                                                                                                                                                                                                                                                                                                                                                                                                                                                                                                                                                                                                                                                                                                                                                                                                                                                                                                                                                                                                                                                                                                                                                                                                                                                                                                                                                                                                                                                                                                                                                                                                                                                                                                                                                                                                                                                                                                                                                                                                                                                                                                                                                                                                                                                                                                                                                                                                                                                                                                                                                                                                                                                                                                                                                                                                                                                                                                                                                                                                                                                                                                                                                                                                                                                                                                                                                                                                                                                                                                                                                                                                                                                                                                                                                                                                                                                                                                                                                                                                                                                                                                                                                                                                                                                                                                                                                                                                                                                                                                                                                                                                                                                                                                                                                                                                                                                                                                                                                                                                                                                                                                                                                                                                                                                                                                                                                                                                                                                                                                                                                                                                                                                                                                                                                                                                                                                                                                                                                                                                                                                                                                                                                                                                                                                                                                                                                                                                                                                                                                                                                                                                                                                                                                                                                                                                                                                                                                                                                                                                                                                                                                                                                                                                                                                                                                                                                                                                                                                                                                                                                                                                                                                                                                                                                                                                                                                                                                                                                                                                                                                                                                                                                                                                                                                           |
| KIAA0146    | 1.031  | 0.0112  | 212523_s_at  | KIAA0146                                                                                                                                                                                                                                                                                                                                                                                                                                                                                                                                                                                                                                                                                                                                                                                                                                                                                                                                                                                                                                                                                                                                                                                                                                                                                                                                                                                                                                                                                                                                                                                                                                                                                                                                                                                                                                                                                                                                                                                                                                                                                                                                                                                                                                                                                                                                                                                                                                                                                                                                                                                                                                                                                                                                                                                                                                                                                                                                                                                                                                                                                                                                                                                                                                                                                                                                                                                                                                                                                                                                                                                                                                                                                                                                                                                                                                                                                                                                                                                                                                                                                                                                                                                                                                                                                                                                                                                                                                                                                                                                                                                                                                                                                                                                                                                                                                                                                                                                                                                                                                                                                                                                                                                                                                                                                                                                                                                                                                                                                                                                                                                                                                                                                                                                                                                                                                                                                                                                                                                                                                                                                                                                                                                                                                                                                                                                                                                                                                                                                                                                                                                                                                                                                                                                                                                                                                                                                                                                                                                                                                                                                                                                                                                                                                                                                                                                                                                                                                                                                                                                                                                                                                                                                                                                                                                                                                                                                                                                                                                                                                                                                                                                                                                                                                                                                                                                                                                                                                                                                                                                                                                                                                                                                                                                                                                                                                                                                                                                                                                                                                                                                                                                                                                                                                                                                                                                                                                                                                                                                                                                                                                                                                                                                                                                                                                                                                                                                                                                                                                                                                                                                                                                                                                                                                                                                                                                                                                                                                                                                                                                                                                                                                                                                                                                                                                                                                                                                                                                                                                                                                                                                                                                                                                                                                                                                                                                                                                                                                                                                                                                                                                                                                                                                                                                                                                                                                                                                                                                                                                                                                                                                                                                                                                                                                                                                                                                                                                                                                                                                                                                                                                                                                                                                                                                                                                                                                                                                                                                                                                                                                                                                                                                                                                                                                                                                                                                                                                                                                                                                                                                                                                                                                                                                                                                                                                                                                                                                                                                                                                                                                                                                                                                                                                                                                                                                                                                                                                                                                                                                                                                                                                                                                                                                                                                                                                                                                                                                                                                                                                                                                                                                                                                                                                                                                                                                                                                                                                                                                                                                                                                                                                                                                                                                                                                                                                                                                                                                                                                                                                                                                                                                                                                                                                                                                                                                                                                                                                                                                                                                                                                                                                                                                                                                                                                                                                                                                                                                                                                                                                                                                                                                                                                                                                                                                                                                                                                                                                                                                                                                                                                                                                                                                                                                                                                                                                                                                                                                                                                                                                                                                                                                                                                                                                                                                                                                                                                                                                                                                                                                                                                                                                                                                                                                                                                                                                                                                                                                                                                                                                                                                                                                                                                                                                                                                                                                                                                                                                                                                                                                                                                                                                                                                                                                                                                                                                                                                                                                                                                                                                                                                                                                                                                                                                                                                                                                                                                                                                                                                                                                                                                                                                                                                                                                                                                                                      |
| MALL        | -2.787 | 0.0113  | 209373_at    | mal, T-cell differentiation protein-like                                                                                                                                                                                                                                                                                                                                                                                                                                                                                                                                                                                                                                                                                                                                                                                                                                                                                                                                                                                                                                                                                                                                                                                                                                                                                                                                                                                                                                                                                                                                                                                                                                                                                                                                                                                                                                                                                                                                                                                                                                                                                                                                                                                                                                                                                                                                                                                                                                                                                                                                                                                                                                                                                                                                                                                                                                                                                                                                                                                                                                                                                                                                                                                                                                                                                                                                                                                                                                                                                                                                                                                                                                                                                                                                                                                                                                                                                                                                                                                                                                                                                                                                                                                                                                                                                                                                                                                                                                                                                                                                                                                                                                                                                                                                                                                                                                                                                                                                                                                                                                                                                                                                                                                                                                                                                                                                                                                                                                                                                                                                                                                                                                                                                                                                                                                                                                                                                                                                                                                                                                                                                                                                                                                                                                                                                                                                                                                                                                                                                                                                                                                                                                                                                                                                                                                                                                                                                                                                                                                                                                                                                                                                                                                                                                                                                                                                                                                                                                                                                                                                                                                                                                                                                                                                                                                                                                                                                                                                                                                                                                                                                                                                                                                                                                                                                                                                                                                                                                                                                                                                                                                                                                                                                                                                                                                                                                                                                                                                                                                                                                                                                                                                                                                                                                                                                                                                                                                                                                                                                                                                                                                                                                                                                                                                                                                                                                                                                                                                                                                                                                                                                                                                                                                                                                                                                                                                                                                                                                                                                                                                                                                                                                                                                                                                                                                                                                                                                                                                                                                                                                                                                                                                                                                                                                                                                                                                                                                                                                                                                                                                                                                                                                                                                                                                                                                                                                                                                                                                                                                                                                                                                                                                                                                                                                                                                                                                                                                                                                                                                                                                                                                                                                                                                                                                                                                                                                                                                                                                                                                                                                                                                                                                                                                                                                                                                                                                                                                                                                                                                                                                                                                                                                                                                                                                                                                                                                                                                                                                                                                                                                                                                                                                                                                                                                                                                                                                                                                                                                                                                                                                                                                                                                                                                                                                                                                                                                                                                                                                                                                                                                                                                                                                                                                                                                                                                                                                                                                                                                                                                                                                                                                                                                                                                                                                                                                                                                                                                                                                                                                                                                                                                                                                                                                                                                                                                                                                                                                                                                                                                                                                                                                                                                                                                                                                                                                                                                                                                                                                                                                                                                                                                                                                                                                                                                                                                                                                                                                                                                                                                                                                                                                                                                                                                                                                                                                                                                                                                                                                                                                                                                                                                                                                                                                                                                                                                                                                                                                                                                                                                                                                                                                                                                                                                                                                                                                                                                                                                                                                                                                                                                                                                                                                                                                                                                                                                                                                                                                                                                                                                                                                                                                                                                                                                                                                                                                                                                                                                                                                                                                                                                                                                                                                                                                                                                                                                                                                                                                                                                                                                                                                                                                                                                                                                                                                      |
| TSG101      | 0.447  | 0.0113  | 201758_at    | tumor susceptibility gene 101                                                                                                                                                                                                                                                                                                                                                                                                                                                                                                                                                                                                                                                                                                                                                                                                                                                                                                                                                                                                                                                                                                                                                                                                                                                                                                                                                                                                                                                                                                                                                                                                                                                                                                                                                                                                                                                                                                                                                                                                                                                                                                                                                                                                                                                                                                                                                                                                                                                                                                                                                                                                                                                                                                                                                                                                                                                                                                                                                                                                                                                                                                                                                                                                                                                                                                                                                                                                                                                                                                                                                                                                                                                                                                                                                                                                                                                                                                                                                                                                                                                                                                                                                                                                                                                                                                                                                                                                                                                                                                                                                                                                                                                                                                                                                                                                                                                                                                                                                                                                                                                                                                                                                                                                                                                                                                                                                                                                                                                                                                                                                                                                                                                                                                                                                                                                                                                                                                                                                                                                                                                                                                                                                                                                                                                                                                                                                                                                                                                                                                                                                                                                                                                                                                                                                                                                                                                                                                                                                                                                                                                                                                                                                                                                                                                                                                                                                                                                                                                                                                                                                                                                                                                                                                                                                                                                                                                                                                                                                                                                                                                                                                                                                                                                                                                                                                                                                                                                                                                                                                                                                                                                                                                                                                                                                                                                                                                                                                                                                                                                                                                                                                                                                                                                                                                                                                                                                                                                                                                                                                                                                                                                                                                                                                                                                                                                                                                                                                                                                                                                                                                                                                                                                                                                                                                                                                                                                                                                                                                                                                                                                                                                                                                                                                                                                                                                                                                                                                                                                                                                                                                                                                                                                                                                                                                                                                                                                                                                                                                                                                                                                                                                                                                                                                                                                                                                                                                                                                                                                                                                                                                                                                                                                                                                                                                                                                                                                                                                                                                                                                                                                                                                                                                                                                                                                                                                                                                                                                                                                                                                                                                                                                                                                                                                                                                                                                                                                                                                                                                                                                                                                                                                                                                                                                                                                                                                                                                                                                                                                                                                                                                                                                                                                                                                                                                                                                                                                                                                                                                                                                                                                                                                                                                                                                                                                                                                                                                                                                                                                                                                                                                                                                                                                                                                                                                                                                                                                                                                                                                                                                                                                                                                                                                                                                                                                                                                                                                                                                                                                                                                                                                                                                                                                                                                                                                                                                                                                                                                                                                                                                                                                                                                                                                                                                                                                                                                                                                                                                                                                                                                                                                                                                                                                                                                                                                                                                                                                                                                                                                                                                                                                                                                                                                                                                                                                                                                                                                                                                                                                                                                                                                                                                                                                                                                                                                                                                                                                                                                                                                                                                                                                                                                                                                                                                                                                                                                                                                                                                                                                                                                                                                                                                                                                                                                                                                                                                                                                                                                                                                                                                                                                                                                                                                                                                                                                                                                                                                                                                                                                                                                                                                                                                                                                                                                                                                                                                                                                                                                                                                                                                                                                                                                                                                                                                                                                 |
| SOX7        | -2.784 | 0.0113  | 228698_at    | SRY (sex determining region Y)-box 7                                                                                                                                                                                                                                                                                                                                                                                                                                                                                                                                                                                                                                                                                                                                                                                                                                                                                                                                                                                                                                                                                                                                                                                                                                                                                                                                                                                                                                                                                                                                                                                                                                                                                                                                                                                                                                                                                                                                                                                                                                                                                                                                                                                                                                                                                                                                                                                                                                                                                                                                                                                                                                                                                                                                                                                                                                                                                                                                                                                                                                                                                                                                                                                                                                                                                                                                                                                                                                                                                                                                                                                                                                                                                                                                                                                                                                                                                                                                                                                                                                                                                                                                                                                                                                                                                                                                                                                                                                                                                                                                                                                                                                                                                                                                                                                                                                                                                                                                                                                                                                                                                                                                                                                                                                                                                                                                                                                                                                                                                                                                                                                                                                                                                                                                                                                                                                                                                                                                                                                                                                                                                                                                                                                                                                                                                                                                                                                                                                                                                                                                                                                                                                                                                                                                                                                                                                                                                                                                                                                                                                                                                                                                                                                                                                                                                                                                                                                                                                                                                                                                                                                                                                                                                                                                                                                                                                                                                                                                                                                                                                                                                                                                                                                                                                                                                                                                                                                                                                                                                                                                                                                                                                                                                                                                                                                                                                                                                                                                                                                                                                                                                                                                                                                                                                                                                                                                                                                                                                                                                                                                                                                                                                                                                                                                                                                                                                                                                                                                                                                                                                                                                                                                                                                                                                                                                                                                                                                                                                                                                                                                                                                                                                                                                                                                                                                                                                                                                                                                                                                                                                                                                                                                                                                                                                                                                                                                                                                                                                                                                                                                                                                                                                                                                                                                                                                                                                                                                                                                                                                                                                                                                                                                                                                                                                                                                                                                                                                                                                                                                                                                                                                                                                                                                                                                                                                                                                                                                                                                                                                                                                                                                                                                                                                                                                                                                                                                                                                                                                                                                                                                                                                                                                                                                                                                                                                                                                                                                                                                                                                                                                                                                                                                                                                                                                                                                                                                                                                                                                                                                                                                                                                                                                                                                                                                                                                                                                                                                                                                                                                                                                                                                                                                                                                                                                                                                                                                                                                                                                                                                                                                                                                                                                                                                                                                                                                                                                                                                                                                                                                                                                                                                                                                                                                                                                                                                                                                                                                                                                                                                                                                                                                                                                                                                                                                                                                                                                                                                                                                                                                                                                                                                                                                                                                                                                                                                                                                                                                                                                                                                                                                                                                                                                                                                                                                                                                                                                                                                                                                                                                                                                                                                                                                                                                                                                                                                                                                                                                                                                                                                                                                                                                                                                                                                                                                                                                                                                                                                                                                                                                                                                                                                                                                                                                                                                                                                                                                                                                                                                                                                                                                                                                                                                                                                                                                                                                                                                                                                                                                                                                                                                                                                                                                                                                                                                                                                                                                                                                                                                                                                                                                                                                                                                                                                                                                          |
| ZEB2        | -1.31  | 0.0113  | 228333_at    | zinc finger E-box binding homeobox 2                                                                                                                                                                                                                                                                                                                                                                                                                                                                                                                                                                                                                                                                                                                                                                                                                                                                                                                                                                                                                                                                                                                                                                                                                                                                                                                                                                                                                                                                                                                                                                                                                                                                                                                                                                                                                                                                                                                                                                                                                                                                                                                                                                                                                                                                                                                                                                                                                                                                                                                                                                                                                                                                                                                                                                                                                                                                                                                                                                                                                                                                                                                                                                                                                                                                                                                                                                                                                                                                                                                                                                                                                                                                                                                                                                                                                                                                                                                                                                                                                                                                                                                                                                                                                                                                                                                                                                                                                                                                                                                                                                                                                                                                                                                                                                                                                                                                                                                                                                                                                                                                                                                                                                                                                                                                                                                                                                                                                                                                                                                                                                                                                                                                                                                                                                                                                                                                                                                                                                                                                                                                                                                                                                                                                                                                                                                                                                                                                                                                                                                                                                                                                                                                                                                                                                                                                                                                                                                                                                                                                                                                                                                                                                                                                                                                                                                                                                                                                                                                                                                                                                                                                                                                                                                                                                                                                                                                                                                                                                                                                                                                                                                                                                                                                                                                                                                                                                                                                                                                                                                                                                                                                                                                                                                                                                                                                                                                                                                                                                                                                                                                                                                                                                                                                                                                                                                                                                                                                                                                                                                                                                                                                                                                                                                                                                                                                                                                                                                                                                                                                                                                                                                                                                                                                                                                                                                                                                                                                                                                                                                                                                                                                                                                                                                                                                                                                                                                                                                                                                                                                                                                                                                                                                                                                                                                                                                                                                                                                                                                                                                                                                                                                                                                                                                                                                                                                                                                                                                                                                                                                                                                                                                                                                                                                                                                                                                                                                                                                                                                                                                                                                                                                                                                                                                                                                                                                                                                                                                                                                                                                                                                                                                                                                                                                                                                                                                                                                                                                                                                                                                                                                                                                                                                                                                                                                                                                                                                                                                                                                                                                                                                                                                                                                                                                                                                                                                                                                                                                                                                                                                                                                                                                                                                                                                                                                                                                                                                                                                                                                                                                                                                                                                                                                                                                                                                                                                                                                                                                                                                                                                                                                                                                                                                                                                                                                                                                                                                                                                                                                                                                                                                                                                                                                                                                                                                                                                                                                                                                                                                                                                                                                                                                                                                                                                                                                                                                                                                                                                                                                                                                                                                                                                                                                                                                                                                                                                                                                                                                                                                                                                                                                                                                                                                                                                                                                                                                                                                                                                                                                                                                                                                                                                                                                                                                                                                                                                                                                                                                                                                                                                                                                                                                                                                                                                                                                                                                                                                                                                                                                                                                                                                                                                                                                                                                                                                                                                                                                                                                                                                                                                                                                                                                                                                                                                                                                                                                                                                                                                                                                                                                                                                                                                                                                                                                                                                                                                                                                                                                                                                                                                                                                                                                                                                                                                                          |
| PTPRB       | -2.801 | 0.0113  | 230250_at    | protein tyrosine phosphatase, receptor type, B                                                                                                                                                                                                                                                                                                                                                                                                                                                                                                                                                                                                                                                                                                                                                                                                                                                                                                                                                                                                                                                                                                                                                                                                                                                                                                                                                                                                                                                                                                                                                                                                                                                                                                                                                                                                                                                                                                                                                                                                                                                                                                                                                                                                                                                                                                                                                                                                                                                                                                                                                                                                                                                                                                                                                                                                                                                                                                                                                                                                                                                                                                                                                                                                                                                                                                                                                                                                                                                                                                                                                                                                                                                                                                                                                                                                                                                                                                                                                                                                                                                                                                                                                                                                                                                                                                                                                                                                                                                                                                                                                                                                                                                                                                                                                                                                                                                                                                                                                                                                                                                                                                                                                                                                                                                                                                                                                                                                                                                                                                                                                                                                                                                                                                                                                                                                                                                                                                                                                                                                                                                                                                                                                                                                                                                                                                                                                                                                                                                                                                                                                                                                                                                                                                                                                                                                                                                                                                                                                                                                                                                                                                                                                                                                                                                                                                                                                                                                                                                                                                                                                                                                                                                                                                                                                                                                                                                                                                                                                                                                                                                                                                                                                                                                                                                                                                                                                                                                                                                                                                                                                                                                                                                                                                                                                                                                                                                                                                                                                                                                                                                                                                                                                                                                                                                                                                                                                                                                                                                                                                                                                                                                                                                                                                                                                                                                                                                                                                                                                                                                                                                                                                                                                                                                                                                                                                                                                                                                                                                                                                                                                                                                                                                                                                                                                                                                                                                                                                                                                                                                                                                                                                                                                                                                                                                                                                                                                                                                                                                                                                                                                                                                                                                                                                                                                                                                                                                                                                                                                                                                                                                                                                                                                                                                                                                                                                                                                                                                                                                                                                                                                                                                                                                                                                                                                                                                                                                                                                                                                                                                                                                                                                                                                                                                                                                                                                                                                                                                                                                                                                                                                                                                                                                                                                                                                                                                                                                                                                                                                                                                                                                                                                                                                                                                                                                                                                                                                                                                                                                                                                                                                                                                                                                                                                                                                                                                                                                                                                                                                                                                                                                                                                                                                                                                                                                                                                                                                                                                                                                                                                                                                                                                                                                                                                                                                                                                                                                                                                                                                                                                                                                                                                                                                                                                                                                                                                                                                                                                                                                                                                                                                                                                                                                                                                                                                                                                                                                                                                                                                                                                                                                                                                                                                                                                                                                                                                                                                                                                                                                                                                                                                                                                                                                                                                                                                                                                                                                                                                                                                                                                                                                                                                                                                                                                                                                                                                                                                                                                                                                                                                                                                                                                                                                                                                                                                                                                                                                                                                                                                                                                                                                                                                                                                                                                                                                                                                                                                                                                                                                                                                                                                                                                                                                                                                                                                                                                                                                                                                                                                                                                                                                                                                                                                                                                                                                                                                                                                                                                                                                                                                                                                                                                                                                                                                                                |
| ANGPTL1     | -2.943 | 0.0113  | 231773_at    | angiotensinogen-like 1                                                                                                                                                                                                                                                                                                                                                                                                                                                                                                                                                                                                                                                                                                                                                                                                                                                                                                                                                                                                                                                                                                                                                                                                                                                                                                                                                                                                                                                                                                                                                                                                                                                                                                                                                                                                                                                                                                                                                                                                                                                                                                                                                                                                                                                                                                                                                                                                                                                                                                                                                                                                                                                                                                                                                                                                                                                                                                                                                                                                                                                                                                                                                                                                                                                                                                                                                                                                                                                                                                                                                                                                                                                                                                                                                                                                                                                                                                                                                                                                                                                                                                                                                                                                                                                                                                                                                                                                                                                                                                                                                                                                                                                                                                                                                                                                                                                                                                                                                                                                                                                                                                                                                                                                                                                                                                                                                                                                                                                                                                                                                                                                                                                                                                                                                                                                                                                                                                                                                                                                                                                                                                                                                                                                                                                                                                                                                                                                                                                                                                                                                                                                                                                                                                                                                                                                                                                                                                                                                                                                                                                                                                                                                                                                                                                                                                                                                                                                                                                                                                                                                                                                                                                                                                                                                                                                                                                                                                                                                                                                                                                                                                                                                                                                                                                                                                                                                                                                                                                                                                                                                                                                                                                                                                                                                                                                                                                                                                                                                                                                                                                                                                                                                                                                                                                                                                                                                                                                                                                                                                                                                                                                                                                                                                                                                                                                                                                                                                                                                                                                                                                                                                                                                                                                                                                                                                                                                                                                                                                                                                                                                                                                                                                                                                                                                                                                                                                                                                                                                                                                                                                                                                                                                                                                                                                                                                                                                                                                                                                                                                                                                                                                                                                                                                                                                                                                                                                                                                                                                                                                                                                                                                                                                                                                                                                                                                                                                                                                                                                                                                                                                                                                                                                                                                                                                                                                                                                                                                                                                                                                                                                                                                                                                                                                                                                                                                                                                                                                                                                                                                                                                                                                                                                                                                                                                                                                                                                                                                                                                                                                                                                                                                                                                                                                                                                                                                                                                                                                                                                                                                                                                                                                                                                                                                                                                                                                                                                                                                                                                                                                                                                                                                                                                                                                                                                                                                                                                                                                                                                                                                                                                                                                                                                                                                                                                                                                                                                                                                                                                                                                                                                                                                                                                                                                                                                                                                                                                                                                                                                                                                                                                                                                                                                                                                                                                                                                                                                                                                                                                                                                                                                                                                                                                                                                                                                                                                                                                                                                                                                                                                                                                                                                                                                                                                                                                                                                                                                                                                                                                                                                                                                                                                                                                                                                                                                                                                                                                                                                                                                                                                                                                                                                                                                                                                                                                                                                                                                                                                                                                                                                                                                                                                                                                                                                                                                                                                                                                                                                                                                                                                                                                                                                                                                                                                                                                                                                                                                                                                                                                                                                                                                                                                                                                                                                                                                                                                                                                                                                                                                                                                                                                                                                                                                                                                                                                        |
| C1orf115    | -2.75  | 0.0114  | 218546_at    | chromosome 1 open reading frame 115                                                                                                                                                                                                                                                                                                                                                                                                                                                                                                                                                                                                                                                                                                                                                                                                                                                                                                                                                                                                                                                                                                                                                                                                                                                                                                                                                                                                                                                                                                                                                                                                                                                                                                                                                                                                                                                                                                                                                                                                                                                                                                                                                                                                                                                                                                                                                                                                                                                                                                                                                                                                                                                                                                                                                                                                                                                                                                                                                                                                                                                                                                                                                                                                                                                                                                                                                                                                                                                                                                                                                                                                                                                                                                                                                                                                                                                                                                                                                                                                                                                                                                                                                                                                                                                                                                                                                                                                                                                                                                                                                                                                                                                                                                                                                                                                                                                                                                                                                                                                                                                                                                                                                                                                                                                                                                                                                                                                                                                                                                                                                                                                                                                                                                                                                                                                                                                                                                                                                                                                                                                                                                                                                                                                                                                                                                                                                                                                                                                                                                                                                                                                                                                                                                                                                                                                                                                                                                                                                                                                                                                                                                                                                                                                                                                                                                                                                                                                                                                                                                                                                                                                                                                                                                                                                                                                                                                                                                                                                                                                                                                                                                                                                                                                                                                                                                                                                                                                                                                                                                                                                                                                                                                                                                                                                                                                                                                                                                                                                                                                                                                                                                                                                                                                                                                                                                                                                                                                                                                                                                                                                                                                                                                                                                                                                                                                                                                                                                                                                                                                                                                                                                                                                                                                                                                                                                                                                                                                                                                                                                                                                                                                                                                                                                                                                                                                                                                                                                                                                                                                                                                                                                                                                                                                                                                                                                                                                                                                                                                                                                                                                                                                                                                                                                                                                                                                                                                                                                                                                                                                                                                                                                                                                                                                                                                                                                                                                                                                                                                                                                                                                                                                                                                                                                                                                                                                                                                                                                                                                                                                                                                                                                                                                                                                                                                                                                                                                                                                                                                                                                                                                                                                                                                                                                                                                                                                                                                                                                                                                                                                                                                                                                                                                                                                                                                                                                                                                                                                                                                                                                                                                                                                                                                                                                                                                                                                                                                                                                                                                                                                                                                                                                                                                                                                                                                                                                                                                                                                                                                                                                                                                                                                                                                                                                                                                                                                                                                                                                                                                                                                                                                                                                                                                                                                                                                                                                                                                                                                                                                                                                                                                                                                                                                                                                                                                                                                                                                                                                                                                                                                                                                                                                                                                                                                                                                                                                                                                                                                                                                                                                                                                                                                                                                                                                                                                                                                                                                                                                                                                                                                                                                                                                                                                                                                                                                                                                                                                                                                                                                                                                                                                                                                                                                                                                                                                                                                                                                                                                                                                                                                                                                                                                                                                                                                                                                                                                                                                                                                                                                                                                                                                                                                                                                                                                                                                                                                                                                                                                                                                                                                                                                                                                                                                                                                                                                                                                                                                                                                                                                                                                                                                                                                                                                                                                                                           |
| SNRNP27     | 0.956  | 0.0115  | 212438_at    | small nuclear ribonucleoprotein 27kDa (U4/U6.U5)                                                                                                                                                                                                                                                                                                                                                                                                                                                                                                                                                                                                                                                                                                                                                                                                                                                                                                                                                                                                                                                                                                                                                                                                                                                                                                                                                                                                                                                                                                                                                                                                                                                                                                                                                                                                                                                                                                                                                                                                                                                                                                                                                                                                                                                                                                                                                                                                                                                                                                                                                                                                                                                                                                                                                                                                                                                                                                                                                                                                                                                                                                                                                                                                                                                                                                                                                                                                                                                                                                                                                                                                                                                                                                                                                                                                                                                                                                                                                                                                                                                                                                                                                                                                                                                                                                                                                                                                                                                                                                                                                                                                                                                                                                                                                                                                                                                                                                                                                                                                                                                                                                                                                                                                                                                                                                                                                                                                                                                                                                                                                                                                                                                                                                                                                                                                                                                                                                                                                                                                                                                                                                                                                                                                                                                                                                                                                                                                                                                                                                                                                                                                                                                                                                                                                                                                                                                                                                                                                                                                                                                                                                                                                                                                                                                                                                                                                                                                                                                                                                                                                                                                                                                                                                                                                                                                                                                                                                                                                                                                                                                                                                                                                                                                                                                                                                                                                                                                                                                                                                                                                                                                                                                                                                                                                                                                                                                                                                                                                                                                                                                                                                                                                                                                                                                                                                                                                                                                                                                                                                                                                                                                                                                                                                                                                                                                                                                                                                                                                                                                                                                                                                                                                                                                                                                                                                                                                                                                                                                                                                                                                                                                                                                                                                                                                                                                                                                                                                                                                                                                                                                                                                                                                                                                                                                                                                                                                                                                                                                                                                                                                                                                                                                                                                                                                                                                                                                                                                                                                                                                                                                                                                                                                                                                                                                                                                                                                                                                                                                                                                                                                                                                                                                                                                                                                                                                                                                                                                                                                                                                                                                                                                                                                                                                                                                                                                                                                                                                                                                                                                                                                                                                                                                                                                                                                                                                                                                                                                                                                                                                                                                                                                                                                                                                                                                                                                                                                                                                                                                                                                                                                                                                                                                                                                                                                                                                                                                                                                                                                                                                                                                                                                                                                                                                                                                                                                                                                                                                                                                                                                                                                                                                                                                                                                                                                                                                                                                                                                                                                                                                                                                                                                                                                                                                                                                                                                                                                                                                                                                                                                                                                                                                                                                                                                                                                                                                                                                                                                                                                                                                                                                                                                                                                                                                                                                                                                                                                                                                                                                                                                                                                                                                                                                                                                                                                                                                                                                                                                                                                                                                                                                                                                                                                                                                                                                                                                                                                                                                                                                                                                                                                                                                                                                                                                                                                                                                                                                                                                                                                                                                                                                                                                                                                                                                                                                                                                                                                                                                                                                                                                                                                                                                                                                                                                                                                                                                                                                                                                                                                                                                                                                                                                                                                                                                                                                                                                                                                                                                                                                                                                                                                                                                                                                                                                                              |
| NACC1       | 0.678  | 0.0118  | 227651_at    | nucleus accumbens associated 1, BEN and BTB (POZ) domain containing                                                                                                                                                                                                                                                                                                                                                                                                                                                                                                                                                                                                                                                                                                                                                                                                                                                                                                                                                                                                                                                                                                                                                                                                                                                                                                                                                                                                                                                                                                                                                                                                                                                                                                                                                                                                                                                                                                                                                                                                                                                                                                                                                                                                                                                                                                                                                                                                                                                                                                                                                                                                                                                                                                                                                                                                                                                                                                                                                                                                                                                                                                                                                                                                                                                                                                                                                                                                                                                                                                                                                                                                                                                                                                                                                                                                                                                                                                                                                                                                                                                                                                                                                                                                                                                                                                                                                                                                                                                                                                                                                                                                                                                                                                                                                                                                                                                                                                                                                                                                                                                                                                                                                                                                                                                                                                                                                                                                                                                                                                                                                                                                                                                                                                                                                                                                                                                                                                                                                                                                                                                                                                                                                                                                                                                                                                                                                                                                                                                                                                                                                                                                                                                                                                                                                                                                                                                                                                                                                                                                                                                                                                                                                                                                                                                                                                                                                                                                                                                                                                                                                                                                                                                                                                                                                                                                                                                                                                                                                                                                                                                                                                                                                                                                                                                                                                                                                                                                                                                                                                                                                                                                                                                                                                                                                                                                                                                                                                                                                                                                                                                                                                                                                                                                                                                                                                                                                                                                                                                                                                                                                                                                                                                                                                                                                                                                                                                                                                                                                                                                                                                                                                                                                                                                                                                                                                                                                                                                                                                                                                                                                                                                                                                                                                                                                                                                                                                                                                                                                                                                                                                                                                                                                                                                                                                                                                                                                                                                                                                                                                                                                                                                                                                                                                                                                                                                                                                                                                                                                                                                                                                                                                                                                                                                                                                                                                                                                                                                                                                                                                                                                                                                                                                                                                                                                                                                                                                                                                                                                                                                                                                                                                                                                                                                                                                                                                                                                                                                                                                                                                                                                                                                                                                                                                                                                                                                                                                                                                                                                                                                                                                                                                                                                                                                                                                                                                                                                                                                                                                                                                                                                                                                                                                                                                                                                                                                                                                                                                                                                                                                                                                                                                                                                                                                                                                                                                                                                                                                                                                                                                                                                                                                                                                                                                                                                                                                                                                                                                                                                                                                                                                                                                                                                                                                                                                                                                                                                                                                                                                                                                                                                                                                                                                                                                                                                                                                                                                                                                                                                                                                                                                                                                                                                                                                                                                                                                                                                                                                                                                                                                                                                                                                                                                                                                                                                                                                                                                                                                                                                                                                                                                                                                                                                                                                                                                                                                                                                                                                                                                                                                                                                                                                                                                                                                                                                                                                                                                                                                                                                                                                                                                                                                                                                                                                                                                                                                                                                                                                                                                                                                                                                                                                                                                                                                                                                                                                                                                                                                                                                                                                                                                                                                                                                                                                                                                                                                                                                                                                                                                                                                                                                                                                                                                                                                           |
| TUBB        | 0.794  | 0.0118  | 212320_at    | tubulin, beta class I                                                                                                                                                                                                                                                                                                                                                                                                                                                                                                                                                                                                                                                                                                                                                                                                                                                                                                                                                                                                                                                                                                                                                                                                                                                                                                                                                                                                                                                                                                                                                                                                                                                                                                                                                                                                                                                                                                                                                                                                                                                                                                                                                                                                                                                                                                                                                                                                                                                                                                                                                                                                                                                                                                                                                                                                                                                                                                                                                                                                                                                                                                                                                                                                                                                                                                                                                                                                                                                                                                                                                                                                                                                                                                                                                                                                                                                                                                                                                                                                                                                                                                                                                                                                                                                                                                                                                                                                                                                                                                                                                                                                                                                                                                                                                                                                                                                                                                                                                                                                                                                                                                                                                                                                                                                                                                                                                                                                                                                                                                                                                                                                                                                                                                                                                                                                                                                                                                                                                                                                                                                                                                                                                                                                                                                                                                                                                                                                                                                                                                                                                                                                                                                                                                                                                                                                                                                                                                                                                                                                                                                                                                                                                                                                                                                                                                                                                                                                                                                                                                                                                                                                                                                                                                                                                                                                                                                                                                                                                                                                                                                                                                                                                                                                                                                                                                                                                                                                                                                                                                                                                                                                                                                                                                                                                                                                                                                                                                                                                                                                                                                                                                                                                                                                                                                                                                                                                                                                                                                                                                                                                                                                                                                                                                                                                                                                                                                                                                                                                                                                                                                                                                                                                                                                                                                                                                                                                                                                                                                                                                                                                                                                                                                                                                                                                                                                                                                                                                                                                                                                                                                                                                                                                                                                                                                                                                                                                                                                                                                                                                                                                                                                                                                                                                                                                                                                                                                                                                                                                                                                                                                                                                                                                                                                                                                                                                                                                                                                                                                                                                                                                                                                                                                                                                                                                                                                                                                                                                                                                                                                                                                                                                                                                                                                                                                                                                                                                                                                                                                                                                                                                                                                                                                                                                                                                                                                                                                                                                                                                                                                                                                                                                                                                                                                                                                                                                                                                                                                                                                                                                                                                                                                                                                                                                                                                                                                                                                                                                                                                                                                                                                                                                                                                                                                                                                                                                                                                                                                                                                                                                                                                                                                                                                                                                                                                                                                                                                                                                                                                                                                                                                                                                                                                                                                                                                                                                                                                                                                                                                                                                                                                                                                                                                                                                                                                                                                                                                                                                                                                                                                                                                                                                                                                                                                                                                                                                                                                                                                                                                                                                                                                                                                                                                                                                                                                                                                                                                                                                                                                                                                                                                                                                                                                                                                                                                                                                                                                                                                                                                                                                                                                                                                                                                                                                                                                                                                                                                                                                                                                                                                                                                                                                                                                                                                                                                                                                                                                                                                                                                                                                                                                                                                                                                                                                                                                                                                                                                                                                                                                                                                                                                                                                                                                                                                                                                                                                                                                                                                                                                                                                                                                                                                                                                                                                                                                         |
| PSMB2       | 0.893  | 0.0118  | 200039_s_at  | proteasome (prosome, macropain) subunit, beta type, 2                                                                                                                                                                                                                                                                                                                                                                                                                                                                                                                                                                                                                                                                                                                                                                                                                                                                                                                                                                                                                                                                                                                                                                                                                                                                                                                                                                                                                                                                                                                                                                                                                                                                                                                                                                                                                                                                                                                                                                                                                                                                                                                                                                                                                                                                                                                                                                                                                                                                                                                                                                                                                                                                                                                                                                                                                                                                                                                                                                                                                                                                                                                                                                                                                                                                                                                                                                                                                                                                                                                                                                                                                                                                                                                                                                                                                                                                                                                                                                                                                                                                                                                                                                                                                                                                                                                                                                                                                                                                                                                                                                                                                                                                                                                                                                                                                                                                                                                                                                                                                                                                                                                                                                                                                                                                                                                                                                                                                                                                                                                                                                                                                                                                                                                                                                                                                                                                                                                                                                                                                                                                                                                                                                                                                                                                                                                                                                                                                                                                                                                                                                                                                                                                                                                                                                                                                                                                                                                                                                                                                                                                                                                                                                                                                                                                                                                                                                                                                                                                                                                                                                                                                                                                                                                                                                                                                                                                                                                                                                                                                                                                                                                                                                                                                                                                                                                                                                                                                                                                                                                                                                                                                                                                                                                                                                                                                                                                                                                                                                                                                                                                                                                                                                                                                                                                                                                                                                                                                                                                                                                                                                                                                                                                                                                                                                                                                                                                                                                                                                                                                                                                                                                                                                                                                                                                                                                                                                                                                                                                                                                                                                                                                                                                                                                                                                                                                                                                                                                                                                                                                                                                                                                                                                                                                                                                                                                                                                                                                                                                                                                                                                                                                                                                                                                                                                                                                                                                                                                                                                                                                                                                                                                                                                                                                                                                                                                                                                                                                                                                                                                                                                                                                                                                                                                                                                                                                                                                                                                                                                                                                                                                                                                                                                                                                                                                                                                                                                                                                                                                                                                                                                                                                                                                                                                                                                                                                                                                                                                                                                                                                                                                                                                                                                                                                                                                                                                                                                                                                                                                                                                                                                                                                                                                                                                                                                                                                                                                                                                                                                                                                                                                                                                                                                                                                                                                                                                                                                                                                                                                                                                                                                                                                                                                                                                                                                                                                                                                                                                                                                                                                                                                                                                                                                                                                                                                                                                                                                                                                                                                                                                                                                                                                                                                                                                                                                                                                                                                                                                                                                                                                                                                                                                                                                                                                                                                                                                                                                                                                                                                                                                                                                                                                                                                                                                                                                                                                                                                                                                                                                                                                                                                                                                                                                                                                                                                                                                                                                                                                                                                                                                                                                                                                                                                                                                                                                                                                                                                                                                                                                                                                                                                                                                                                                                                                                                                                                                                                                                                                                                                                                                                                                                                                                                                                                                                                                                                                                                                                                                                                                                                                                                                                                                                                                                                                                                                                                                                                                                                                                                                                                                                                                                                                                                                                                                         |
| LAPTM4B     | 1.428  | 0.0118  | 208029_s_at  | lysosomal protein transmembrane 4 beta                                                                                                                                                                                                                                                                                                                                                                                                                                                                                                                                                                                                                                                                                                                                                                                                                                                                                                                                                                                                                                                                                                                                                                                                                                                                                                                                                                                                                                                                                                                                                                                                                                                                                                                                                                                                                                                                                                                                                                                                                                                                                                                                                                                                                                                                                                                                                                                                                                                                                                                                                                                                                                                                                                                                                                                                                                                                                                                                                                                                                                                                                                                                                                                                                                                                                                                                                                                                                                                                                                                                                                                                                                                                                                                                                                                                                                                                                                                                                                                                                                                                                                                                                                                                                                                                                                                                                                                                                                                                                                                                                                                                                                                                                                                                                                                                                                                                                                                                                                                                                                                                                                                                                                                                                                                                                                                                                                                                                                                                                                                                                                                                                                                                                                                                                                                                                                                                                                                                                                                                                                                                                                                                                                                                                                                                                                                                                                                                                                                                                                                                                                                                                                                                                                                                                                                                                                                                                                                                                                                                                                                                                                                                                                                                                                                                                                                                                                                                                                                                                                                                                                                                                                                                                                                                                                                                                                                                                                                                                                                                                                                                                                                                                                                                                                                                                                                                                                                                                                                                                                                                                                                                                                                                                                                                                                                                                                                                                                                                                                                                                                                                                                                                                                                                                                                                                                                                                                                                                                                                                                                                                                                                                                                                                                                                                                                                                                                                                                                                                                                                                                                                                                                                                                                                                                                                                                                                                                                                                                                                                                                                                                                                                                                                                                                                                                                                                                                                                                                                                                                                                                                                                                                                                                                                                                                                                                                                                                                                                                                                                                                                                                                                                                                                                                                                                                                                                                                                                                                                                                                                                                                                                                                                                                                                                                                                                                                                                                                                                                                                                                                                                                                                                                                                                                                                                                                                                                                                                                                                                                                                                                                                                                                                                                                                                                                                                                                                                                                                                                                                                                                                                                                                                                                                                                                                                                                                                                                                                                                                                                                                                                                                                                                                                                                                                                                                                                                                                                                                                                                                                                                                                                                                                                                                                                                                                                                                                                                                                                                                                                                                                                                                                                                                                                                                                                                                                                                                                                                                                                                                                                                                                                                                                                                                                                                                                                                                                                                                                                                                                                                                                                                                                                                                                                                                                                                                                                                                                                                                                                                                                                                                                                                                                                                                                                                                                                                                                                                                                                                                                                                                                                                                                                                                                                                                                                                                                                                                                                                                                                                                                                                                                                                                                                                                                                                                                                                                                                                                                                                                                                                                                                                                                                                                                                                                                                                                                                                                                                                                                                                                                                                                                                                                                                                                                                                                                                                                                                                                                                                                                                                                                                                                                                                                                                                                                                                                                                                                                                                                                                                                                                                                                                                                                                                                                                                                                                                                                                                                                                                                                                                                                                                                                                                                                                                                                                                                                                                                                                                                                                                                                                                                                                                                                                                                                                                                        |
| ZNF438      | -0.867 | 0.0118  | 229743_at    | zinc finger protein 438                                                                                                                                                                                                                                                                                                                                                                                                                                                                                                                                                                                                                                                                                                                                                                                                                                                                                                                                                                                                                                                                                                                                                                                                                                                                                                                                                                                                                                                                                                                                                                                                                                                                                                                                                                                                                                                                                                                                                                                                                                                                                                                                                                                                                                                                                                                                                                                                                                                                                                                                                                                                                                                                                                                                                                                                                                                                                                                                                                                                                                                                                                                                                                                                                                                                                                                                                                                                                                                                                                                                                                                                                                                                                                                                                                                                                                                                                                                                                                                                                                                                                                                                                                                                                                                                                                                                                                                                                                                                                                                                                                                                                                                                                                                                                                                                                                                                                                                                                                                                                                                                                                                                                                                                                                                                                                                                                                                                                                                                                                                                                                                                                                                                                                                                                                                                                                                                                                                                                                                                                                                                                                                                                                                                                                                                                                                                                                                                                                                                                                                                                                                                                                                                                                                                                                                                                                                                                                                                                                                                                                                                                                                                                                                                                                                                                                                                                                                                                                                                                                                                                                                                                                                                                                                                                                                                                                                                                                                                                                                                                                                                                                                                                                                                                                                                                                                                                                                                                                                                                                                                                                                                                                                                                                                                                                                                                                                                                                                                                                                                                                                                                                                                                                                                                                                                                                                                                                                                                                                                                                                                                                                                                                                                                                                                                                                                                                                                                                                                                                                                                                                                                                                                                                                                                                                                                                                                                                                                                                                                                                                                                                                                                                                                                                                                                                                                                                                                                                                                                                                                                                                                                                                                                                                                                                                                                                                                                                                                                                                                                                                                                                                                                                                                                                                                                                                                                                                                                                                                                                                                                                                                                                                                                                                                                                                                                                                                                                                                                                                                                                                                                                                                                                                                                                                                                                                                                                                                                                                                                                                                                                                                                                                                                                                                                                                                                                                                                                                                                                                                                                                                                                                                                                                                                                                                                                                                                                                                                                                                                                                                                                                                                                                                                                                                                                                                                                                                                                                                                                                                                                                                                                                                                                                                                                                                                                                                                                                                                                                                                                                                                                                                                                                                                                                                                                                                                                                                                                                                                                                                                                                                                                                                                                                                                                                                                                                                                                                                                                                                                                                                                                                                                                                                                                                                                                                                                                                                                                                                                                                                                                                                                                                                                                                                                                                                                                                                                                                                                                                                                                                                                                                                                                                                                                                                                                                                                                                                                                                                                                                                                                                                                                                                                                                                                                                                                                                                                                                                                                                                                                                                                                                                                                                                                                                                                                                                                                                                                                                                                                                                                                                                                                                                                                                                                                                                                                                                                                                                                                                                                                                                                                                                                                                                                                                                                                                                                                                                                                                                                                                                                                                                                                                                                                                                                                                                                                                                                                                                                                                                                                                                                                                                                                                                                                                                                                                                                                                                                                                                                                                                                                                                                                                                                                                                                                                                                       |
| HLX         | -2.254 | 0.0118  | 214438_at    | H2.0-like homeobox                                                                                                                                                                                                                                                                                                                                                                                                                                                                                                                                                                                                                                                                                                                                                                                                                                                                                                                                                                                                                                                                                                                                                                                                                                                                                                                                                                                                                                                                                                                                                                                                                                                                                                                                                                                                                                                                                                                                                                                                                                                                                                                                                                                                                                                                                                                                                                                                                                                                                                                                                                                                                                                                                                                                                                                                                                                                                                                                                                                                                                                                                                                                                                                                                                                                                                                                                                                                                                                                                                                                                                                                                                                                                                                                                                                                                                                                                                                                                                                                                                                                                                                                                                                                                                                                                                                                                                                                                                                                                                                                                                                                                                                                                                                                                                                                                                                                                                                                                                                                                                                                                                                                                                                                                                                                                                                                                                                                                                                                                                                                                                                                                                                                                                                                                                                                                                                                                                                                                                                                                                                                                                                                                                                                                                                                                                                                                                                                                                                                                                                                                                                                                                                                                                                                                                                                                                                                                                                                                                                                                                                                                                                                                                                                                                                                                                                                                                                                                                                                                                                                                                                                                                                                                                                                                                                                                                                                                                                                                                                                                                                                                                                                                                                                                                                                                                                                                                                                                                                                                                                                                                                                                                                                                                                                                                                                                                                                                                                                                                                                                                                                                                                                                                                                                                                                                                                                                                                                                                                                                                                                                                                                                                                                                                                                                                                                                                                                                                                                                                                                                                                                                                                                                                                                                                                                                                                                                                                                                                                                                                                                                                                                                                                                                                                                                                                                                                                                                                                                                                                                                                                                                                                                                                                                                                                                                                                                                                                                                                                                                                                                                                                                                                                                                                                                                                                                                                                                                                                                                                                                                                                                                                                                                                                                                                                                                                                                                                                                                                                                                                                                                                                                                                                                                                                                                                                                                                                                                                                                                                                                                                                                                                                                                                                                                                                                                                                                                                                                                                                                                                                                                                                                                                                                                                                                                                                                                                                                                                                                                                                                                                                                                                                                                                                                                                                                                                                                                                                                                                                                                                                                                                                                                                                                                                                                                                                                                                                                                                                                                                                                                                                                                                                                                                                                                                                                                                                                                                                                                                                                                                                                                                                                                                                                                                                                                                                                                                                                                                                                                                                                                                                                                                                                                                                                                                                                                                                                                                                                                                                                                                                                                                                                                                                                                                                                                                                                                                                                                                                                                                                                                                                                                                                                                                                                                                                                                                                                                                                                                                                                                                                                                                                                                                                                                                                                                                                                                                                                                                                                                                                                                                                                                                                                                                                                                                                                                                                                                                                                                                                                                                                                                                                                                                                                                                                                                                                                                                                                                                                                                                                                                                                                                                                                                                                                                                                                                                                                                                                                                                                                                                                                                                                                                                                                                                                                                                                                                                                                                                                                                                                                                                                                                                                                                                                                                                                                                                                                                                                                                                                                                                                                                                                                                                                                                                                                                            |
| SERF2-C15OR | 0.987  | 0.0118  | 233746_x_at  | chromosome 15 open reading frame 63 /// microRNA 1282 /// small EDRK-rich factor 2 /// SERF2-C15orf63 readthrough                                                                                                                                                                                                                                                                                                                                                                                                                                                                                                                                                                                                                                                                                                                                                                                                                                                                                                                                                                                                                                                                                                                                                                                                                                                                                                                                                                                                                                                                                                                                                                                                                                                                                                                                                                                                                                                                                                                                                                                                                                                                                                                                                                                                                                                                                                                                                                                                                                                                                                                                                                                                                                                                                                                                                                                                                                                                                                                                                                                                                                                                                                                                                                                                                                                                                                                                                                                                                                                                                                                                                                                                                                                                                                                                                                                                                                                                                                                                                                                                                                                                                                                                                                                                                                                                                                                                                                                                                                                                                                                                                                                                                                                                                                                                                                                                                                                                                                                                                                                                                                                                                                                                                                                                                                                                                                                                                                                                                                                                                                                                                                                                                                                                                                                                                                                                                                                                                                                                                                                                                                                                                                                                                                                                                                                                                                                                                                                                                                                                                                                                                                                                                                                                                                                                                                                                                                                                                                                                                                                                                                                                                                                                                                                                                                                                                                                                                                                                                                                                                                                                                                                                                                                                                                                                                                                                                                                                                                                                                                                                                                                                                                                                                                                                                                                                                                                                                                                                                                                                                                                                                                                                                                                                                                                                                                                                                                                                                                                                                                                                                                                                                                                                                                                                                                                                                                                                                                                                                                                                                                                                                                                                                                                                                                                                                                                                                                                                                                                                                                                                                                                                                                                                                                                                                                                                                                                                                                                                                                                                                                                                                                                                                                                                                                                                                                                                                                                                                                                                                                                                                                                                                                                                                                                                                                                                                                                                                                                                                                                                                                                                                                                                                                                                                                                                                                                                                                                                                                                                                                                                                                                                                                                                                                                                                                                                                                                                                                                                                                                                                                                                                                                                                                                                                                                                                                                                                                                                                                                                                                                                                                                                                                                                                                                                                                                                                                                                                                                                                                                                                                                                                                                                                                                                                                                                                                                                                                                                                                                                                                                                                                                                                                                                                                                                                                                                                                                                                                                                                                                                                                                                                                                                                                                                                                                                                                                                                                                                                                                                                                                                                                                                                                                                                                                                                                                                                                                                                                                                                                                                                                                                                                                                                                                                                                                                                                                                                                                                                                                                                                                                                                                                                                                                                                                                                                                                                                                                                                                                                                                                                                                                                                                                                                                                                                                                                                                                                                                                                                                                                                                                                                                                                                                                                                                                                                                                                                                                                                                                                                                                                                                                                                                                                                                                                                                                                                                                                                                                                                                                                                                                                                                                                                                                                                                                                                                                                                                                                                                                                                                                                                                                                                                                                                                                                                                                                                                                                                                                                                                                                                                                                                                                                                                                                                                                                                                                                                                                                                                                                                                                                                                                                                                                                                                                                                                                                                                                                                                                                                                                                                                                                                                                                                                                                                                                                                                                                                                                                                                                                                                                                                                                                                                                                                                             |
| PSMG3       | 0.998  | 0.0118  | 223363_at    | proteasome (prosome, macropain) assembly chaperone 3                                                                                                                                                                                                                                                                                                                                                                                                                                                                                                                                                                                                                                                                                                                                                                                                                                                                                                                                                                                                                                                                                                                                                                                                                                                                                                                                                                                                                                                                                                                                                                                                                                                                                                                                                                                                                                                                                                                                                                                                                                                                                                                                                                                                                                                                                                                                                                                                                                                                                                                                                                                                                                                                                                                                                                                                                                                                                                                                                                                                                                                                                                                                                                                                                                                                                                                                                                                                                                                                                                                                                                                                                                                                                                                                                                                                                                                                                                                                                                                                                                                                                                                                                                                                                                                                                                                                                                                                                                                                                                                                                                                                                                                                                                                                                                                                                                                                                                                                                                                                                                                                                                                                                                                                                                                                                                                                                                                                                                                                                                                                                                                                                                                                                                                                                                                                                                                                                                                                                                                                                                                                                                                                                                                                                                                                                                                                                                                                                                                                                                                                                                                                                                                                                                                                                                                                                                                                                                                                                                                                                                                                                                                                                                                                                                                                                                                                                                                                                                                                                                                                                                                                                                                                                                                                                                                                                                                                                                                                                                                                                                                                                                                                                                                                                                                                                                                                                                                                                                                                                                                                                                                                                                                                                                                                                                                                                                                                                                                                                                                                                                                                                                                                                                                                                                                                                                                                                                                                                                                                                                                                                                                                                                                                                                                                                                                                                                                                                                                                                                                                                                                                                                                                                                                                                                                                                                                                                                                                                                                                                                                                                                                                                                                                                                                                                                                                                                                                                                                                                                                                                                                                                                                                                                                                                                                                                                                                                                                                                                                                                                                                                                                                                                                                                                                                                                                                                                                                                                                                                                                                                                                                                                                                                                                                                                                                                                                                                                                                                                                                                                                                                                                                                                                                                                                                                                                                                                                                                                                                                                                                                                                                                                                                                                                                                                                                                                                                                                                                                                                                                                                                                                                                                                                                                                                                                                                                                                                                                                                                                                                                                                                                                                                                                                                                                                                                                                                                                                                                                                                                                                                                                                                                                                                                                                                                                                                                                                                                                                                                                                                                                                                                                                                                                                                                                                                                                                                                                                                                                                                                                                                                                                                                                                                                                                                                                                                                                                                                                                                                                                                                                                                                                                                                                                                                                                                                                                                                                                                                                                                                                                                                                                                                                                                                                                                                                                                                                                                                                                                                                                                                                                                                                                                                                                                                                                                                                                                                                                                                                                                                                                                                                                                                                                                                                                                                                                                                                                                                                                                                                                                                                                                                                                                                                                                                                                                                                                                                                                                                                                                                                                                                                                                                                                                                                                                                                                                                                                                                                                                                                                                                                                                                                                                                                                                                                                                                                                                                                                                                                                                                                                                                                                                                                                                                                                                                                                                                                                                                                                                                                                                                                                                                                                                                                                                                                                                                                                                                                                                                                                                                                                                                                                                                                                                                                                                          |
| LSM4        | 1.255  | 0.0119  | 202737_s_at  | LSM4 homolog, U6 small nuclear RNA associated (S. cerevisiae)                                                                                                                                                                                                                                                                                                                                                                                                                                                                                                                                                                                                                                                                                                                                                                                                                                                                                                                                                                                                                                                                                                                                                                                                                                                                                                                                                                                                                                                                                                                                                                                                                                                                                                                                                                                                                                                                                                                                                                                                                                                                                                                                                                                                                                                                                                                                                                                                                                                                                                                                                                                                                                                                                                                                                                                                                                                                                                                                                                                                                                                                                                                                                                                                                                                                                                                                                                                                                                                                                                                                                                                                                                                                                                                                                                                                                                                                                                                                                                                                                                                                                                                                                                                                                                                                                                                                                                                                                                                                                                                                                                                                                                                                                                                                                                                                                                                                                                                                                                                                                                                                                                                                                                                                                                                                                                                                                                                                                                                                                                                                                                                                                                                                                                                                                                                                                                                                                                                                                                                                                                                                                                                                                                                                                                                                                                                                                                                                                                                                                                                                                                                                                                                                                                                                                                                                                                                                                                                                                                                                                                                                                                                                                                                                                                                                                                                                                                                                                                                                                                                                                                                                                                                                                                                                                                                                                                                                                                                                                                                                                                                                                                                                                                                                                                                                                                                                                                                                                                                                                                                                                                                                                                                                                                                                                                                                                                                                                                                                                                                                                                                                                                                                                                                                                                                                                                                                                                                                                                                                                                                                                                                                                                                                                                                                                                                                                                                                                                                                                                                                                                                                                                                                                                                                                                                                                                                                                                                                                                                                                                                                                                                                                                                                                                                                                                                                                                                                                                                                                                                                                                                                                                                                                                                                                                                                                                                                                                                                                                                                                                                                                                                                                                                                                                                                                                                                                                                                                                                                                                                                                                                                                                                                                                                                                                                                                                                                                                                                                                                                                                                                                                                                                                                                                                                                                                                                                                                                                                                                                                                                                                                                                                                                                                                                                                                                                                                                                                                                                                                                                                                                                                                                                                                                                                                                                                                                                                                                                                                                                                                                                                                                                                                                                                                                                                                                                                                                                                                                                                                                                                                                                                                                                                                                                                                                                                                                                                                                                                                                                                                                                                                                                                                                                                                                                                                                                                                                                                                                                                                                                                                                                                                                                                                                                                                                                                                                                                                                                                                                                                                                                                                                                                                                                                                                                                                                                                                                                                                                                                                                                                                                                                                                                                                                                                                                                                                                                                                                                                                                                                                                                                                                                                                                                                                                                                                                                                                                                                                                                                                                                                                                                                                                                                                                                                                                                                                                                                                                                                                                                                                                                                                                                                                                                                                                                                                                                                                                                                                                                                                                                                                                                                                                                                                                                                                                                                                                                                                                                                                                                                                                                                                                                                                                                                                                                                                                                                                                                                                                                                                                                                                                                                                                                                                                                                                                                                                                                                                                                                                                                                                                                                                                                                                                                                                                                                                                                                                                                                                                                                                                                                                                                                                                                                                                                                                 |
| ZNF85       | 1.579  | 0.012   | 1554445_at   | zinc finger protein 85                                                                                                                                                                                                                                                                                                                                                                                                                                                                                                                                                                                                                                                                                                                                                                                                                                                                                                                                                                                                                                                                                                                                                                                                                                                                                                                                                                                                                                                                                                                                                                                                                                                                                                                                                                                                                                                                                                                                                                                                                                                                                                                                                                                                                                                                                                                                                                                                                                                                                                                                                                                                                                                                                                                                                                                                                                                                                                                                                                                                                                                                                                                                                                                                                                                                                                                                                                                                                                                                                                                                                                                                                                                                                                                                                                                                                                                                                                                                                                                                                                                                                                                                                                                                                                                                                                                                                                                                                                                                                                                                                                                                                                                                                                                                                                                                                                                                                                                                                                                                                                                                                                                                                                                                                                                                                                                                                                                                                                                                                                                                                                                                                                                                                                                                                                                                                                                                                                                                                                                                                                                                                                                                                                                                                                                                                                                                                                                                                                                                                                                                                                                                                                                                                                                                                                                                                                                                                                                                                                                                                                                                                                                                                                                                                                                                                                                                                                                                                                                                                                                                                                                                                                                                                                                                                                                                                                                                                                                                                                                                                                                                                                                                                                                                                                                                                                                                                                                                                                                                                                                                                                                                                                                                                                                                                                                                                                                                                                                                                                                                                                                                                                                                                                                                                                                                                                                                                                                                                                                                                                                                                                                                                                                                                                                                                                                                                                                                                                                                                                                                                                                                                                                                                                                                                                                                                                                                                                                                                                                                                                                                                                                                                                                                                                                                                                                                                                                                                                                                                                                                                                                                                                                                                                                                                                                                                                                                                                                                                                                                                                                                                                                                                                                                                                                                                                                                                                                                                                                                                                                                                                                                                                                                                                                                                                                                                                                                                                                                                                                                                                                                                                                                                                                                                                                                                                                                                                                                                                                                                                                                                                                                                                                                                                                                                                                                                                                                                                                                                                                                                                                                                                                                                                                                                                                                                                                                                                                                                                                                                                                                                                                                                                                                                                                                                                                                                                                                                                                                                                                                                                                                                                                                                                                                                                                                                                                                                                                                                                                                                                                                                                                                                                                                                                                                                                                                                                                                                                                                                                                                                                                                                                                                                                                                                                                                                                                                                                                                                                                                                                                                                                                                                                                                                                                                                                                                                                                                                                                                                                                                                                                                                                                                                                                                                                                                                                                                                                                                                                                                                                                                                                                                                                                                                                                                                                                                                                                                                                                                                                                                                                                                                                                                                                                                                                                                                                                                                                                                                                                                                                                                                                                                                                                                                                                                                                                                                                                                                                                                                                                                                                                                                                                                                                                                                                                                                                                                                                                                                                                                                                                                                                                                                                                                                                                                                                                                                                                                                                                                                                                                                                                                                                                                                                                                                                                                                                                                                                                                                                                                                                                                                                                                                                                                                                                                                                                                                                                                                                                                                                                                                                                                                                                                                                                                                                                                                        |
| CDKN2AIP    | -0.689 | 0.0121  | 218929_at    | CDKN2A interacting protein                                                                                                                                                                                                                                                                                                                                                                                                                                                                                                                                                                                                                                                                                                                                                                                                                                                                                                                                                                                                                                                                                                                                                                                                                                                                                                                                                                                                                                                                                                                                                                                                                                                                                                                                                                                                                                                                                                                                                                                                                                                                                                                                                                                                                                                                                                                                                                                                                                                                                                                                                                                                                                                                                                                                                                                                                                                                                                                                                                                                                                                                                                                                                                                                                                                                                                                                                                                                                                                                                                                                                                                                                                                                                                                                                                                                                                                                                                                                                                                                                                                                                                                                                                                                                                                                                                                                                                                                                                                                                                                                                                                                                                                                                                                                                                                                                                                                                                                                                                                                                                                                                                                                                                                                                                                                                                                                                                                                                                                                                                                                                                                                                                                                                                                                                                                                                                                                                                                                                                                                                                                                                                                                                                                                                                                                                                                                                                                                                                                                                                                                                                                                                                                                                                                                                                                                                                                                                                                                                                                                                                                                                                                                                                                                                                                                                                                                                                                                                                                                                                                                                                                                                                                                                                                                                                                                                                                                                                                                                                                                                                                                                                                                                                                                                                                                                                                                                                                                                                                                                                                                                                                                                                                                                                                                                                                                                                                                                                                                                                                                                                                                                                                                                                                                                                                                                                                                                                                                                                                                                                                                                                                                                                                                                                                                                                                                                                                                                                                                                                                                                                                                                                                                                                                                                                                                                                                                                                                                                                                                                                                                                                                                                                                                                                                                                                                                                                                                                                                                                                                                                                                                                                                                                                                                                                                                                                                                                                                                                                                                                                                                                                                                                                                                                                                                                                                                                                                                                                                                                                                                                                                                                                                                                                                                                                                                                                                                                                                                                                                                                                                                                                                                                                                                                                                                                                                                                                                                                                                                                                                                                                                                                                                                                                                                                                                                                                                                                                                                                                                                                                                                                                                                                                                                                                                                                                                                                                                                                                                                                                                                                                                                                                                                                                                                                                                                                                                                                                                                                                                                                                                                                                                                                                                                                                                                                                                                                                                                                                                                                                                                                                                                                                                                                                                                                                                                                                                                                                                                                                                                                                                                                                                                                                                                                                                                                                                                                                                                                                                                                                                                                                                                                                                                                                                                                                                                                                                                                                                                                                                                                                                                                                                                                                                                                                                                                                                                                                                                                                                                                                                                                                                                                                                                                                                                                                                                                                                                                                                                                                                                                                                                                                                                                                                                                                                                                                                                                                                                                                                                                                                                                                                                                                                                                                                                                                                                                                                                                                                                                                                                                                                                                                                                                                                                                                                                                                                                                                                                                                                                                                                                                                                                                                                                                                                                                                                                                                                                                                                                                                                                                                                                                                                                                                                                                                                                                                                                                                                                                                                                                                                                                                                                                                                                                                                                                                                                                                                                                                                                                                                                                                                                                                                                                                                                                                                                                    |
| PRKCH       | -1.987 | 0.0122  | 218764_at    | protein kinase C, eta                                                                                                                                                                                                                                                                                                                                                                                                                                                                                                                                                                                                                                                                                                                                                                                                                                                                                                                                                                                                                                                                                                                                                                                                                                                                                                                                                                                                                                                                                                                                                                                                                                                                                                                                                                                                                                                                                                                                                                                                                                                                                                                                                                                                                                                                                                                                                                                                                                                                                                                                                                                                                                                                                                                                                                                                                                                                                                                                                                                                                                                                                                                                                                                                                                                                                                                                                                                                                                                                                                                                                                                                                                                                                                                                                                                                                                                                                                                                                                                                                                                                                                                                                                                                                                                                                                                                                                                                                                                                                                                                                                                                                                                                                                                                                                                                                                                                                                                                                                                                                                                                                                                                                                                                                                                                                                                                                                                                                                                                                                                                                                                                                                                                                                                                                                                                                                                                                                                                                                                                                                                                                                                                                                                                                                                                                                                                                                                                                                                                                                                                                                                                                                                                                                                                                                                                                                                                                                                                                                                                                                                                                                                                                                                                                                                                                                                                                                                                                                                                                                                                                                                                                                                                                                                                                                                                                                                                                                                                                                                                                                                                                                                                                                                                                                                                                                                                                                                                                                                                                                                                                                                                                                                                                                                                                                                                                                                                                                                                                                                                                                                                                                                                                                                                                                                                                                                                                                                                                                                                                                                                                                                                                                                                                                                                                                                                                                                                                                                                                                                                                                                                                                                                                                                                                                                                                                                                                                                                                                                                                                                                                                                                                                                                                                                                                                                                                                                                                                                                                                                                                                                                                                                                                                                                                                                                                                                                                                                                                                                                                                                                                                                                                                                                                                                                                                                                                                                                                                                                                                                                                                                                                                                                                                                                                                                                                                                                                                                                                                                                                                                                                                                                                                                                                                                                                                                                                                                                                                                                                                                                                                                                                                                                                                                                                                                                                                                                                                                                                                                                                                                                                                                                                                                                                                                                                                                                                                                                                                                                                                                                                                                                                                                                                                                                                                                                                                                                                                                                                                                                                                                                                                                                                                                                                                                                                                                                                                                                                                                                                                                                                                                                                                                                                                                                                                                                                                                                                                                                                                                                                                                                                                                                                                                                                                                                                                                                                                                                                                                                                                                                                                                                                                                                                                                                                                                                                                                                                                                                                                                                                                                                                                                                                                                                                                                                                                                                                                                                                                                                                                                                                                                                                                                                                                                                                                                                                                                                                                                                                                                                                                                                                                                                                                                                                                                                                                                                                                                                                                                                                                                                                                                                                                                                                                                                                                                                                                                                                                                                                                                                                                                                                                                                                                                                                                                                                                                                                                                                                                                                                                                                                                                                                                                                                                                                                                                                                                                                                                                                                                                                                                                                                                                                                                                                                                                                                                                                                                                                                                                                                                                                                                                                                                                                                                                                                                                                                                                                                                                                                                                                                                                                                                                                                                                                                                                                                         |
| SPICE1      | 0.847  | 0.0122  | 234995_at    | spindle and centriole associated protein 1                                                                                                                                                                                                                                                                                                                                                                                                                                                                                                                                                                                                                                                                                                                                                                                                                                                                                                                                                                                                                                                                                                                                                                                                                                                                                                                                                                                                                                                                                                                                                                                                                                                                                                                                                                                                                                                                                                                                                                                                                                                                                                                                                                                                                                                                                                                                                                                                                                                                                                                                                                                                                                                                                                                                                                                                                                                                                                                                                                                                                                                                                                                                                                                                                                                                                                                                                                                                                                                                                                                                                                                                                                                                                                                                                                                                                                                                                                                                                                                                                                                                                                                                                                                                                                                                                                                                                                                                                                                                                                                                                                                                                                                                                                                                                                                                                                                                                                                                                                                                                                                                                                                                                                                                                                                                                                                                                                                                                                                                                                                                                                                                                                                                                                                                                                                                                                                                                                                                                                                                                                                                                                                                                                                                                                                                                                                                                                                                                                                                                                                                                                                                                                                                                                                                                                                                                                                                                                                                                                                                                                                                                                                                                                                                                                                                                                                                                                                                                                                                                                                                                                                                                                                                                                                                                                                                                                                                                                                                                                                                                                                                                                                                                                                                                                                                                                                                                                                                                                                                                                                                                                                                                                                                                                                                                                                                                                                                                                                                                                                                                                                                                                                                                                                                                                                                                                                                                                                                                                                                                                                                                                                                                                                                                                                                                                                                                                                                                                                                                                                                                                                                                                                                                                                                                                                                                                                                                                                                                                                                                                                                                                                                                                                                                                                                                                                                                                                                                                                                                                                                                                                                                                                                                                                                                                                                                                                                                                                                                                                                                                                                                                                                                                                                                                                                                                                                                                                                                                                                                                                                                                                                                                                                                                                                                                                                                                                                                                                                                                                                                                                                                                                                                                                                                                                                                                                                                                                                                                                                                                                                                                                                                                                                                                                                                                                                                                                                                                                                                                                                                                                                                                                                                                                                                                                                                                                                                                                                                                                                                                                                                                                                                                                                                                                                                                                                                                                                                                                                                                                                                                                                                                                                                                                                                                                                                                                                                                                                                                                                                                                                                                                                                                                                                                                                                                                                                                                                                                                                                                                                                                                                                                                                                                                                                                                                                                                                                                                                                                                                                                                                                                                                                                                                                                                                                                                                                                                                                                                                                                                                                                                                                                                                                                                                                                                                                                                                                                                                                                                                                                                                                                                                                                                                                                                                                                                                                                                                                                                                                                                                                                                                                                                                                                                                                                                                                                                                                                                                                                                                                                                                                                                                                                                                                                                                                                                                                                                                                                                                                                                                                                                                                                                                                                                                                                                                                                                                                                                                                                                                                                                                                                                                                                                                                                                                                                                                                                                                                                                                                                                                                                                                                                                                                                                                                                                                                                                                                                                                                                                                                                                                                                                                                                                                                                                                                                                                                                                                                                                                                                                                                                                                                                                                                                                                                                                                    |
| LOC10050702 | 3.154  | 0.0122  | 232035_at    | histone cluster 1, H4a /// histone cluster 1, H4b /// histone cluster 1, H4c /// histone cluster 1, H4d /// histone cluster 1, H4e /// histone cluster 1, H4f /// histone cluster 1, H4g /// histone cluster 1, H4h /// histone cluster 1, H4i /// histone cluster 1, H4j /// histone cluster 1, H4k /// histone cluster 1, H4l /// histone cluster 1, H4m /// histone cluster 1, H4n /// histone cluster 1, H4o /// histone cluster 1, H4p /// histone cluster 1, H4q /// histone cluster 1, H4r /// histone cluster 1, H4s /// histone cluster 1, H4t /// histone cluster 1, H4u /// histone cluster 1, H4v /// histone cluster 1, H4w /// histone cluster 1, H4x /// histone cluster 1, H4y /// histone cluster 1, H4z /// histone cluster 1, H4aa /// histone cluster 1, H4ab /// histone cluster 1, H4ac /// histone cluster 1, H4ad /// histone cluster 1, H4ae /// histone cluster 1, H4af /// histone cluster 1, H4ag /// histone cluster 1, H4ah /// histone cluster 1, H4ai /// histone cluster 1, H4aj /// histone cluster 1, H4ak /// histone cluster 1, H4al /// histone cluster 1, H4am /// histone cluster 1, H4an /// histone cluster 1, H4ao /// histone cluster 1, H4ap /// histone cluster 1, H4aq /// histone cluster 1, H4ar /// histone cluster 1, H4as /// histone cluster 1, H4at /// histone cluster 1, H4au /// histone cluster 1, H4av /// histone cluster 1, H4aw /// histone cluster 1, H4ax /// histone cluster 1, H4ay /// histone cluster 1, H4az /// histone cluster 1, H4aa' /// histone cluster 1, H4ab' /// histone cluster 1, H4ac' /// histone cluster 1, H4ad' /// histone cluster 1, H4ae' /// histone cluster 1, H4af' /// histone cluster 1, H4ag' /// histone cluster 1, H4ah' /// histone cluster 1, H4ai' /// histone cluster 1, H4aj' /// histone cluster 1, H4ak' /// histone cluster 1, H4al' /// histone cluster 1, H4am' /// histone cluster 1, H4an' /// histone cluster 1, H4ao' /// histone cluster 1, H4ap' /// histone cluster 1, H4aq' /// histone cluster 1, H4ar' /// histone cluster 1, H4as' /// histone cluster 1, H4at' /// histone cluster 1, H4au' /// histone cluster 1, H4av' /// histone cluster 1, H4aw' /// histone cluster 1, H4ax' /// histone cluster 1, H4ay' /// histone cluster 1, H4az' /// histone cluster 1, H4aa'' /// histone cluster 1, H4ab'' /// histone cluster 1, H4ac'' /// histone cluster 1, H4ad'' /// histone cluster 1, H4ae'' /// histone cluster 1, H4af'' /// histone cluster 1, H4ag'' /// histone cluster 1, H4ah'' /// histone cluster 1, H4ai'' /// histone cluster 1, H4aj'' /// histone cluster 1, H4ak'' /// histone cluster 1, H4al'' /// histone cluster 1, H4am'' /// histone cluster 1, H4an'' /// histone cluster 1, H4ao'' /// histone cluster 1, H4ap'' /// histone cluster 1, H4aq'' /// histone cluster 1, H4ar'' /// histone cluster 1, H4as'' /// histone cluster 1, H4at'' /// histone cluster 1, H4au'' /// histone cluster 1, H4av'' /// histone cluster 1, H4aw'' /// histone cluster 1, H4ax'' /// histone cluster 1, H4ay'' /// histone cluster 1, H4az'' /// histone cluster 1, H4aa''' /// histone cluster 1, H4ab''' /// histone cluster 1, H4ac''' /// histone cluster 1, H4ad''' /// histone cluster 1, H4ae''' /// histone cluster 1, H4af''' /// histone cluster 1, H4ag''' /// histone cluster 1, H4ah''' /// histone cluster 1, H4ai''' /// histone cluster 1, H4aj''' /// histone cluster 1, H4ak''' /// histone cluster 1, H4al''' /// histone cluster 1, H4am''' /// histone cluster 1, H4an''' /// histone cluster 1, H4ao''' /// histone cluster 1, H4ap''' /// histone cluster 1, H4aq''' /// histone cluster 1, H4ar''' /// histone cluster 1, H4as''' /// histone cluster 1, H4at''' /// histone cluster 1, H4au''' /// histone cluster 1, H4av''' /// histone cluster 1, H4aw''' /// histone cluster 1, H4ax''' /// histone cluster 1, H4ay''' /// histone cluster 1, H4az''' /// histone cluster 1, H4aa'''' /// histone cluster 1, H4ab'''' /// histone cluster 1, H4ac'''' /// histone cluster 1, H4ad'''' /// histone cluster 1, H4ae'''' /// histone cluster 1, H4af'''' /// histone cluster 1, H4ag'''' /// histone cluster 1, H4ah'''' /// histone cluster 1, H4ai'''' /// histone cluster 1, H4aj'''' /// histone cluster 1, H4ak'''' /// histone cluster 1, H4al'''' /// histone cluster 1, H4am'''' /// histone cluster 1, H4an'''' /// histone cluster 1, H4ao'''' /// histone cluster 1, H4ap'''' /// histone cluster 1, H4aq'''' /// histone cluster 1, H4ar'''' /// histone cluster 1, H4as'''' /// histone cluster 1, H4at'''' /// histone cluster 1, H4au'''' /// histone cluster 1, H4av'''' /// histone cluster 1, H4aw'''' /// histone cluster 1, H4ax'''' /// histone cluster 1, H4ay'''' /// histone cluster 1, H4az'''' /// histone cluster 1, H4aa''''' /// histone cluster 1, H4ab''''' /// histone cluster 1, H4ac''''' /// histone cluster 1, H4ad''''' /// histone cluster 1, H4ae''''' /// histone cluster 1, H4af''''' /// histone cluster 1, H4ag''''' /// histone cluster 1, H4ah''''' /// histone cluster 1, H4ai''''' /// histone cluster 1, H4aj''''' /// histone cluster 1, H4ak''''' /// histone cluster 1, H4al''''' /// histone cluster 1, H4am''''' /// histone cluster 1, H4an''''' /// histone cluster 1, H4ao''''' /// histone cluster 1, H4ap''''' /// histone cluster 1, H4aq''''' /// histone cluster 1, H4ar''''' /// histone cluster 1, H4as''''' /// histone cluster 1, H4at''''' /// histone cluster 1, H4au''''' /// histone cluster 1, H4av''''' /// histone cluster 1, H4aw''''' /// histone cluster 1, H4ax''''' /// histone cluster 1, H4ay''''' /// histone cluster 1, H4az''''' /// histone cluster 1, H4aa'''''' /// histone cluster 1, H4ab'''''' /// histone cluster 1, H4ac'''''' /// histone cluster 1, H4ad'''''' /// histone cluster 1, H4ae'''''' /// histone cluster 1, H4af'''''' /// histone cluster 1, H4ag'''''' /// histone cluster 1, H4ah'''''' /// histone cluster 1, H4ai'''''' /// histone cluster 1, H4aj'''''' /// histone cluster 1, H4ak'''''' /// histone cluster 1, H4al'''''' /// histone cluster 1, H4am'''''' /// histone cluster 1, H4an'''''' /// histone cluster 1, H4ao'''''' /// histone cluster 1, H4ap'''''' /// histone cluster 1, H4aq'''''' /// histone cluster 1, H4ar'''''' /// histone cluster 1, H4as'''''' /// histone cluster 1, H4at'''''' /// histone cluster 1, H4au'''''' /// histone cluster 1, H4av'''''' /// histone cluster 1, H4aw'''''' /// histone cluster 1, H4ax'''''' /// histone cluster 1, H4ay'''''' /// histone cluster 1, H4az'''''' /// histone cluster 1, H4aa''''''' /// histone cluster 1, H4ab''''''' /// histone cluster 1, H4ac''''''' /// histone cluster 1, H4ad''''''' /// histone cluster 1, H4ae''''''' /// histone cluster 1, H4af''''''' /// histone cluster 1, H4ag''''''' /// histone cluster 1, H4ah''''''' /// histone cluster 1, H4ai''''''' /// histone cluster 1, H4aj''''''' /// histone cluster 1, H4ak''''''' /// histone cluster 1, H4al''''''' /// histone cluster 1, H4am''''''' /// histone cluster 1, H4an''''''' /// histone cluster 1, H4ao''''''' /// histone cluster 1, H4ap''''''' /// histone cluster 1, H4aq''''''' /// histone cluster 1, H4ar''''''' /// histone cluster 1, H4as''''''' /// histone cluster 1, H4at''''''' /// histone cluster 1, H4au''''''' /// histone cluster 1, H4av''''''' /// histone cluster 1, H4aw''''''' /// histone cluster 1, H4ax''''''' /// histone cluster 1, H4ay''''''' /// histone cluster 1, H4az''''''' /// histone cluster 1, H4aa'''''''' /// histone cluster 1, H4ab'''''''' /// histone cluster 1, H4ac'''''''' /// histone cluster 1, H4ad'''''''' /// histone cluster 1, H4ae'''''''' /// histone cluster 1, H4af'''''''' /// histone cluster 1, H4ag'''''''' /// histone cluster 1, H4ah'''''''' /// histone cluster 1, H4ai'''''''' /// histone cluster 1, H4aj'''''''' /// histone cluster 1, H4ak'''''''' /// histone cluster 1, H4al'''''''' /// histone cluster 1, H4am'''''''' /// histone cluster 1, H4an'''''''' /// histone cluster 1, H4ao'''''''' /// histone cluster 1, H4ap'''''''' /// histone cluster 1, H4aq'''''''' /// histone cluster 1, H4ar'''''''' /// histone cluster 1, H4as'''''''' /// histone cluster 1, H4at'''''''' /// histone cluster 1, H4au'''''''' /// histone cluster 1, H4av'''''''' /// histone cluster 1, H4aw'''''''' /// histone cluster 1, H4ax'''''''' /// histone cluster 1, H4ay'''''''' /// histone cluster 1, H4az'''''''' /// histone cluster 1, H4aa''''''''' /// histone cluster 1, H4ab''''''''' /// histone cluster 1, H4ac''''''''' /// histone cluster 1, H4ad''''''''' /// histone cluster 1, H4ae''''''''' /// histone cluster 1, H4af''''''''' /// histone cluster 1, H4ag''''''''' /// histone cluster 1, H4ah''''''''' /// histone cluster 1, H4ai''''''''' /// histone cluster 1, H4aj''''''''' /// histone cluster 1, H4ak''''''''' /// histone cluster 1, H4al''''''''' /// histone cluster 1, H4am''''''''' /// histone cluster 1, H4an''''''''' /// histone cluster 1, H4ao''''''''' /// histone cluster 1, H4ap''''''''' /// histone cluster 1, H4aq''''''''' /// histone cluster 1, H4ar''''''''' /// histone cluster 1, H4as''''''''' /// histone cluster 1, H4at''''''''' /// histone cluster 1, H4au''''''''' /// histone cluster 1, H4av''''''''' /// histone cluster 1, H4aw''''''''' /// histone cluster 1, H4ax''''''''' /// histone cluster 1, H4ay''''''''' /// histone cluster 1, H4az''''''''' /// histone cluster 1, H4aa'''''''''' /// histone cluster 1, H4ab'''''''''' /// histone cluster 1, H4ac'''''''''' /// histone cluster 1, H4ad'''''''''' /// histone cluster 1, H4ae'''''''''' /// histone cluster 1, H4af'''''''''' /// histone cluster 1, H4ag'''''''''' /// histone cluster 1, H4ah'''''''''' /// histone cluster 1, H4ai'''''''''' /// histone cluster 1, H4aj'''''''''' /// histone cluster 1, H4ak'''''''''' /// histone cluster 1, H4al'''''''''' /// histone cluster 1, H4am'''''''''' /// histone cluster 1, H4an'''''''''' /// histone cluster 1, H4ao'''''''''' /// histone cluster 1, H4ap'''''''''' /// histone cluster 1, H4aq'''''''''' /// histone cluster 1, H4ar'''''''''' /// histone cluster 1, H4as'''''''''' /// histone cluster 1, H4at'''''''''' /// histone cluster 1, H4au'''''''''' /// histone cluster 1, H4av'''''''''' /// histone cluster 1, H4aw'''''''''' /// histone cluster 1, H4ax'''''''''' /// histone cluster 1, H4ay'''''''''' /// histone cluster 1, H4az'''''''''' /// histone cluster 1, H4aa''''''''''' /// histone cluster 1, H4ab''''''''''' /// histone cluster 1, H4ac''''''''''' /// histone cluster 1, H4ad''''''''''' /// histone cluster 1, H4ae''''''''''' /// histone cluster 1, H4af''''''''''' /// histone cluster 1, H4ag''''''''''' /// histone cluster 1, H4ah''''''''''' /// histone cluster 1, H4ai''''''''''' /// histone cluster 1, H4aj''''''''''' /// histone cluster 1, H4ak''''''''''' /// histone cluster 1, H4al''''''''''' /// histone cluster 1, H4am''''''''''' /// histone cluster 1, H4an''''''''''' /// histone cluster 1, H4ao''''''''''' /// histone cluster 1, H4ap''''''''''' /// histone cluster 1, H4aq''''''''''' /// histone cluster 1, H4ar''''''''''' /// histone cluster 1, H4as''''''''''' /// histone cluster 1, H4at''''''''''' /// histone cluster 1, H4au''''''''''' /// histone cluster 1, H4av''''''''''' /// histone cluster 1, H4aw''''''''''' /// histone cluster 1, H4ax''''''''''' /// histone cluster 1, H4ay''''''''''' /// histone cluster 1, H4az''''''''''' /// histone cluster 1, H4aa'''''''''''' /// histone cluster 1, H4ab'''''''''''' /// histone cluster 1, H4ac'''''''''''' /// histone cluster 1, H4ad'''''''''''' /// histone cluster 1, H4ae'''''''''''' /// histone cluster 1, H4af'''''''''''' /// histone cluster 1, H4ag'''''''''''' /// histone cluster 1, H4ah'''''''''''' /// histone cluster 1, H4ai'''''''''''' /// histone cluster 1, H4aj'''''''''''' /// histone cluster 1, H4ak'''''''''''' /// histone cluster 1, H4al'''''''''''' /// histone cluster 1, H4am'''''''''''' /// histone cluster 1, H4an'''''''''''' /// histone cluster 1, H4ao'''''''''''' /// histone cluster 1, H4ap'''''''''''' /// histone cluster 1, H4aq'''''''''''' /// histone cluster 1, H4ar'''''''''''' /// histone cluster 1, H4as'''''''''''' /// histone cluster 1, H4at'''''''''''' /// histone cluster 1, H4au'''''''''''' /// histone cluster 1, H4av'''''''''''' /// histone cluster 1, H4aw'''''''''''' /// histone cluster 1, H4ax'''''''''''' /// histone cluster 1, H4ay'''''''''''' /// histone cluster 1, H4az'''''''''''' /// histone cluster 1, H4aa''''''''''''' /// histone cluster 1, H4ab''''''''''''' /// histone cluster 1, H4ac''''''''''''' /// histone cluster 1, H4ad''''''''''''' /// histone cluster 1, H4ae''''''''''''' /// histone cluster 1, H4af''''''''''''' /// histone cluster 1, H4ag''''''''''''' /// histone cluster 1, H4ah''''''''''''' /// histone cluster 1, H4ai''''''''''''' /// histone cluster 1, H4aj''''''''''''' /// histone cluster 1, H4ak''''''''''''' /// histone cluster 1, H4al''''''''''''' /// histone cluster 1, H4am''''''''''''' /// histone cluster 1, H4an''''''''''''' /// histone cluster 1, H4ao''''''''''''' /// histone cluster 1, H4ap''''''''''''' /// histone cluster 1, H4aq''''''''''''' /// histone cluster 1, H4ar''''''''''''' /// histone cluster 1, H4as''''''''''''' /// histone cluster 1, H4at''''''''''''' /// histone cluster 1, H4au''''''''''''' /// histone cluster 1, H4av''''''''''''' /// histone cluster 1, H4aw''''''''''''' /// histone cluster 1, H4ax''''''''''''' /// histone cluster 1, H4ay''''''''''''' /// histone cluster 1, H4az''''''''''''' /// histone cluster 1, H4aa'''''''''''''' /// histone cluster 1, H4ab'''''''''''''' /// histone cluster 1, H4ac'''''''''''''' /// histone cluster 1, H4ad'''''''''''''' /// histone cluster 1, H4ae'''''''''''''' /// histone cluster 1, H4af'''''''''''''' /// histone cluster 1, H4ag'''''''''''''' /// histone cluster 1, H4ah'''''''''''''' /// histone cluster 1, H4ai'''''''''''''' /// histone cluster 1, H4aj'''''''''''''' /// histone cluster 1, H4ak'''''''''''''' /// histone cluster 1, H4al'''''''''''''' /// histone cluster 1, H4am'''''''''''''' /// histone cluster 1, H4an'''''''''''''' /// histone cluster 1, H4ao'''''''''''''' /// histone cluster 1, H4ap'''''''''''''' /// histone cluster 1, H4aq'''''''''''''' /// histone cluster 1, H4ar'''''''''''''' /// histone cluster 1, H4as'''''''''''''' /// histone cluster 1, H4at'''''''''''''' /// histone cluster 1, H4au'''''''''''''' /// histone cluster 1, H4av'''''''''''''' /// histone cluster 1, H4aw'''''''''''''' /// histone cluster 1, H4ax'''''''''''''' /// histone cluster 1, H4ay'''''''''''''' /// histone cluster 1, H4az'''''''''''''' /// histone cluster 1, H4aa''''''''''''''' /// histone cluster 1, H4ab''''''''''''''' /// histone cluster 1, H4ac''''''''''''''' /// histone cluster 1, H4ad''''''''''''''' /// histone cluster 1, H4ae''''''''''''''' /// histone cluster 1, H4af''''''''''''''' /// histone cluster 1, H4ag''''''''''''''' /// histone cluster 1, H4ah''''''''''''''' /// histone cluster 1, H4ai''''''''''''''' /// histone cluster 1, H4aj''''''''''''''' /// histone cluster 1, H4ak''''''''''''''' /// histone cluster 1, H4al''''''''''''''' /// histone cluster 1, H4am''''''''''''''' /// histone cluster 1, H4an''''''''''''''' /// histone cluster 1, H4ao''''''''''''''' /// histone cluster 1, H4ap''''''''''''''' /// histone cluster 1, H4aq''''''''''''''' /// histone cluster 1, H4ar''''''''''''''' /// histone cluster 1, H4as''''''''''''''' /// histone cluster 1, H4at''''''''''''''' /// histone cluster 1, H4au''''''''''''''' /// histone cluster 1, H4av''''''''''''''' /// histone cluster 1, H4aw''''''''''''''' /// histone cluster 1, H4ax''''''''''''''' /// histone cluster 1, H4ay''''''''''''''' /// histone cluster 1, H4az''''''''''''''' /// histone cluster 1, H4aa'''''''''''''''' /// histone cluster 1, H4ab'''''''''''''''' /// histone cluster 1, H4ac'''''''''''''''' /// histone cluster 1, H4ad'''''''''''''''' /// histone cluster 1, H4ae'''''''''''''''' /// histone cluster 1, H4af'''''''''''''''' /// histone cluster 1, H4ag'''''''''''''''' /// histone cluster 1, H4ah'''''''''''''''' /// histone cluster 1, H4ai'''''''''''''''' /// histone cluster 1, H4aj'''''''''''''''' /// histone cluster 1, H4ak'''''''''''''''' /// histone cluster 1, H4al'''''''''''''''' /// histone cluster 1, H4am'''''''''''''''' /// histone cluster 1, H4an'''''''''''''''' /// histone cluster 1, H4ao'''''''''''''''' /// histone cluster 1, H4ap'''''''''''''''' /// histone cluster 1, H4aq'''''''''''''''' /// histone cluster 1, H4ar'''''''''''''''' /// histone cluster 1, H4as'''''''''''''''' /// histone cluster 1, H4at'''''''''''''''' /// histone cluster 1, H4au'''''''''''''''' /// histone cluster 1, H4av'''''''''''''''' /// histone cluster 1, H4aw'''''''''''''''' /// histone cluster 1, H4ax'''''''''''''''' /// histone cluster 1, H4ay'''''''''''''''' /// histone cluster 1, H4az'''''''''''''''' /// histone cluster 1, H4aa''''''''''''''''' /// histone cluster 1, H4ab''''''''''''''''' /// histone cluster 1, H4ac''''''''''''''''' /// histone cluster 1, H4ad''''''''''''''''' /// histone cluster 1, H4ae''''''''''''''''' /// histone cluster 1, H4af''''''''''''''''' /// histone cluster 1, H4ag''''''''''''''''' /// histone cluster 1, H4ah''''''''''''''''' /// histone cluster 1, H4ai''''''''''''''''' /// histone cluster 1, H4aj''''''''''''''''' /// histone cluster 1, H4ak''''''''''''''''' /// histone cluster 1, H4al''''''''''''''''' /// histone cluster 1, H4am''''''''''''''''' /// histone cluster 1, H4an''''''''''''''''' /// histone cluster 1, H4ao''''''''''''''''' /// histone cluster 1, H4ap''''''''''''''''' /// histone cluster 1, H4aq''''''''''''''''' /// histone cluster 1, H4ar''''''''''''''''' /// histone cluster 1, H4as''''''''''''''''' /// histone cluster 1, H4at''''''''''''''''' /// histone cluster 1, H4au''''''''''''''''' /// histone cluster 1, H4av''''''''''''''''' /// histone cluster 1, H4aw''''''''''''''''' /// histone cluster 1, H4ax''''''''''''''''' /// histone cluster 1, H4ay''''''''''''''''' /// histone cluster 1, H4az''''''''''''''''' /// histone cluster 1, H4aa'''''''''''''''''' /// histone cluster 1, H4ab'''''''''''''''''' /// histone cluster 1, H4ac'''''''''''''''''' /// histone cluster 1, H4ad'''''''''''''''''' /// histone cluster 1, H4ae'''''''''''''''''' /// histone cluster 1, H4af'''''''''''''''''' /// histone cluster 1, H4ag'''''''''''''''''' /// histone cluster 1, H4ah'''''''''''''''''' /// histone cluster 1, H4ai'''''''''''''''''' /// histone cluster 1, H4aj'''''''''''''''''' /// histone cluster 1, H4ak'''''''''''''''''' /// histone cluster 1, H4al'''''''''''''''''' /// histone cluster 1, H4am'''''''''''''''''' /// histone cluster 1, H4an'''''''''''''''''' /// histone cluster 1, H4ao'''''''''''''''''' /// histone cluster 1, H4ap'''''''''''''''''' /// histone cluster 1, H4aq'''''''''''''''''' /// histone cluster 1, H4ar'''''''''''''''''' /// histone cluster 1, H4as'''''''''''''''''' /// histone cluster 1, H4at'''''''''''''''''' /// histone cluster 1, H4au'''''''''''''''''' /// histone cluster 1, H4av'''''''''''''''''' /// histone cluster 1, H4aw'''''''''''''''''' /// histone cluster 1, H4ax'''''''''''''''''' /// histone cluster 1, H4ay'''''''''''''''''' /// histone cluster 1, H4az'''''''''''''''''' /// histone cluster 1, H4aa''''''''''''''''''' /// histone cluster 1, H4ab''''''''''''''''''' /// histone cluster 1, H4ac''''''''''''''''''' /// histone cluster 1, H4ad''''''''''''''''''' /// histone cluster 1, H4ae''''''''''''''''''' /// histone cluster 1, H4af''''''''''''''''''' /// histone cluster 1, H4ag''''''''''''''''''' /// histone cluster 1, H4ah''''''''''''''''''' /// histone cluster 1, H4ai''''''''''''''''''' /// histone cluster 1, H4aj''''''''''''''''''' /// histone cluster 1, H4ak''''''''''''''''''' /// histone cluster 1, H4al''''''''''''''''''' /// histone cluster 1, H4am''''''''''''''''''' /// histone cluster 1, H4an''''''''''''''''''' /// histone cluster 1, H4ao''''''''''''''''''' /// histone cluster 1, H4ap''''''''''''''''''' /// histone cluster 1, H4aq''''''''''''''''''' /// histone cluster 1, H4ar''''''''''''''''''' /// histone cluster 1, H4as''''''''''''''''''' /// histone cluster 1, H4at''''''''''''''''''' /// histone cluster 1, H4au'''''' |

|             |        |        |              |                                                                                                                                                                                                                                                                 |
|-------------|--------|--------|--------------|-----------------------------------------------------------------------------------------------------------------------------------------------------------------------------------------------------------------------------------------------------------------|
| CYBRD1      | 2.129  | 0.0122 | 217889_s_at  | cytochrome b reductase 1                                                                                                                                                                                                                                        |
| MTMR10      | -0.608 | 0.0122 | 225810_at    | myotubularin related protein 10                                                                                                                                                                                                                                 |
| CEP170      | 0.757  | 0.0122 | 212746_s_at  | centrosomal protein 170kDa                                                                                                                                                                                                                                      |
| NDUFS6      | 1.355  | 0.0122 | 203606_at    | NADH dehydrogenase (ubiquinone) Fe-S protein 6, 13kDa (NADH-coenzyme Q reductase)                                                                                                                                                                               |
| TFCP2       | 0.906  | 0.0123 | 209338_at    | transcription factor CP2                                                                                                                                                                                                                                        |
| EBF1        | -2.775 | 0.0123 | 227646_at    | early B-cell factor 1                                                                                                                                                                                                                                           |
| ATXN3       | -1.576 | 0.0124 | 238723_at    | ataxin 3                                                                                                                                                                                                                                                        |
| CPA3        | -4.021 | 0.0124 | 205624_at    | carboxypeptidase A3 (mast cell)                                                                                                                                                                                                                                 |
| DNAJB11     | 0.82   | 0.0124 | 223054_at    | DnaJ (Hsp40) homolog, subfamily B, member 11                                                                                                                                                                                                                    |
| UCHL1       | 3.761  | 0.0125 | 201387_s_at  | ubiquitin carboxyl-terminal esterase L1 (ubiquitin thiolesterase)                                                                                                                                                                                               |
| MCTP1       | -2.49  | 0.0125 | 235740_at    | multiple C2 domains, transmembrane 1                                                                                                                                                                                                                            |
| PTPN13      | -2.614 | 0.0125 | 204201_s_at  | protein tyrosine phosphatase, non-receptor type 13 (APO-1/CD95 (Fas)-associated phosphatase)                                                                                                                                                                    |
| RPS6KA5     | -1.107 | 0.0125 | 204633_s_at  | ribosomal protein S6 kinase, 90kDa, polypeptide 5                                                                                                                                                                                                               |
| PCNXL2      | -0.747 | 0.0125 | 39650_s_at   | pecanex-like 2 (Drosophila)                                                                                                                                                                                                                                     |
| POLR3A      | 0.431  | 0.0125 | 227872_at    | polymerase (RNA) III (DNA directed) polypeptide A, 155kDa                                                                                                                                                                                                       |
| HEATR2      | 0.944  | 0.0125 | 218460_at    | HEAT repeat containing 2                                                                                                                                                                                                                                        |
| METTL2B     | 1.135  | 0.0125 | 225253_s_at  | methyltransferase like 2A /// methyltransferase like 2B                                                                                                                                                                                                         |
| XRCC4       | 1.18   | 0.0125 | 210813_s_at  | X-ray repair complementing defective repair in Chinese hamster cells 4                                                                                                                                                                                          |
| GTF2IRD1    | 1.409  | 0.0125 | 218412_s_at  | GTF2I repeat domain containing 1                                                                                                                                                                                                                                |
| LRRC61      | 1.915  | 0.0125 | 218907_s_at  | leucine rich repeat containing 61                                                                                                                                                                                                                               |
| KRT14       | 4.485  | 0.0126 | 209351_at    | keratin 14                                                                                                                                                                                                                                                      |
| SLMO2       | 0.798  | 0.0126 | 217851_s_at  | slowmo homolog 2 (Drosophila)                                                                                                                                                                                                                                   |
| RAD18       | 1.065  | 0.0127 | 223417_at    | RAD18 homolog (S. cerevisiae)                                                                                                                                                                                                                                   |
| EF5         | -1.757 | 0.0127 | 204400_at    | embryonal-like associated substrate                                                                                                                                                                                                                             |
| RYK         | 0.414  | 0.0128 | 216976_s_at  | receptor-like tyrosine kinase                                                                                                                                                                                                                                   |
| SEC11A      | 0.44   | 0.0129 | 201290_at    | SEC11 homolog A (S. cerevisiae)                                                                                                                                                                                                                                 |
| LARS        | 0.49   | 0.0129 | 222428_s_at  | leucyl-tRNA synthetase                                                                                                                                                                                                                                          |
| PSMC3       | 0.861  | 0.0129 | 201267_s_at  | proteasome (prosome, macropain) 26S subunit, ATPase, 3                                                                                                                                                                                                          |
| TRAFD1      | 1.184  | 0.0129 | 35254_at     | TRAF-type zinc finger domain containing 1                                                                                                                                                                                                                       |
| ARHGAP6     | -1.388 | 0.0129 | 209539_at    | Rac/Cdc42 guanine nucleotide exchange factor (GEF) 6                                                                                                                                                                                                            |
| YIP6        | 0.578  | 0.0129 | 212341_at    | Yip1 domain family, member 6                                                                                                                                                                                                                                    |
| FAM192A     | 0.621  | 0.0129 | 222460_s_at  | family with sequence similarity 192, member A                                                                                                                                                                                                                   |
| FADD        | 0.937  | 0.0129 | 202535_at    | Fas (TNFRSF6)-associated via death domain                                                                                                                                                                                                                       |
| CDC90B      | 1.156  | 0.0129 | 1568834_s_at | coiled-coil domain containing 90B                                                                                                                                                                                                                               |
| MIS18A      | 1.253  | 0.0129 | 219004_s_at  | MIS18 kinetochore protein homolog A (S. pombe)                                                                                                                                                                                                                  |
| ETS1        | -1.396 | 0.0129 | 224833_at    | v-ets erythroblastosis virus E26 oncogene homolog 1 (avian)                                                                                                                                                                                                     |
| CENPF       | 2.259  | 0.013  | 209172_s_at  | centromere protein F, 350/400kDa (mitosin)                                                                                                                                                                                                                      |
| RPGR        | -1.331 | 0.013  | 207624_s_at  | retinitis pigmentosa GTPase regulator                                                                                                                                                                                                                           |
| STAMBIP     | 0.703  | 0.013  | 202811_at    | STAM binding protein                                                                                                                                                                                                                                            |
| MRPS5       | 0.794  | 0.013  | 224333_s_at  | mitochondrial ribosomal protein S5                                                                                                                                                                                                                              |
| PSMC2       | 0.719  | 0.0131 | 201068_s_at  | proteasome (prosome, macropain) 26S subunit, ATPase, 2                                                                                                                                                                                                          |
| PRPF4       | 0.674  | 0.0132 | 209161_at    | PRP4 pre-mRNA processing factor 4 homolog (yeast)                                                                                                                                                                                                               |
| FAM149A     | -2.121 | 0.0132 | 222291_at    | family with sequence similarity 149, member A                                                                                                                                                                                                                   |
| KIAA0232    | -0.641 | 0.0132 | 212441_at    | KIAA0232                                                                                                                                                                                                                                                        |
| CDK7        | 1.446  | 0.0133 | 211297_s_at  | cyclin-dependent kinase 7                                                                                                                                                                                                                                       |
| SND1        | 0.805  | 0.0134 | 201622_at    | staphylococcal nuclease and tudor domain containing 1                                                                                                                                                                                                           |
| CRYBG3      | -0.798 | 0.0134 | 214030_at    | beta-gamma crystallin domain containing 3                                                                                                                                                                                                                       |
| FAM98B      | 0.685  | 0.0134 | 1564637_a_at | family with sequence similarity 98, member B                                                                                                                                                                                                                    |
| SLC39A10    | 1.057  | 0.0134 | 225295_at    | solute carrier family 39 (zinc transporter), member 10                                                                                                                                                                                                          |
| EME1        | 1.574  | 0.0134 | 234464_s_at  | essential meiotic endonuclease 1 homolog 1 (S. pombe)                                                                                                                                                                                                           |
| LOC10050549 | -2.469 | 0.0134 | 230132_at    | uncharacterized LOC100505495                                                                                                                                                                                                                                    |
| LURAP1L     | -2.53  | 0.0135 | 227443_at    | leucine rich adaptor protein 1-like                                                                                                                                                                                                                             |
| PLCXD3      | -2.861 | 0.0135 | 230081_at    | phosphatidylinositol-specific phospholipase C, X domain containing 3                                                                                                                                                                                            |
| PIGU        | 1.195  | 0.0135 | 225903_at    | phosphatidylinositol glycan anchor biosynthesis, class U                                                                                                                                                                                                        |
| LRRC20      | 0.661  | 0.0136 | 218550_s_at  | leucine rich repeat containing 20                                                                                                                                                                                                                               |
| RELL1       | -1.015 | 0.0136 | 226430_at    | RELT-like 1                                                                                                                                                                                                                                                     |
| FLJ27352    | 0.945  | 0.0136 | 243309_at    | uncharacterized LOC145788                                                                                                                                                                                                                                       |
| NIPA2       | 0.969  | 0.0136 | 212133_at    | non imprinted in Prader-Willi/Angelman syndrome 2                                                                                                                                                                                                               |
| LSM3        | 0.973  | 0.0136 | 202209_at    | LSM3 homolog, U6 small nuclear RNA associated (S. cerevisiae)                                                                                                                                                                                                   |
| CEP89       | 1.144  | 0.0136 | 1553732_s_at | centrosomal protein 89kDa                                                                                                                                                                                                                                       |
| SLC7A1      | 1.697  | 0.0136 | 212295_s_at  | solute carrier family 7 (cationic amino acid transporter, y+ system), member 1                                                                                                                                                                                  |
| ITGB4       | 1.771  | 0.0136 | 204990_s_at  | integrin, beta 4                                                                                                                                                                                                                                                |
| DAAM2       | -2.055 | 0.0136 | 212793_at    | dishevelled associated activator of morphogenesis 2                                                                                                                                                                                                             |
| BRD1        | -0.771 | 0.0136 | 215460_x_at  | bromodomain containing 1                                                                                                                                                                                                                                        |
| CDC6        | 1.725  | 0.0136 | 203968_s_at  | cell division cycle 6 homolog (S. cerevisiae)                                                                                                                                                                                                                   |
| ESAM        | -2.718 | 0.0136 | 225369_at    | endothelial cell adhesion molecule                                                                                                                                                                                                                              |
| IRAK3       | -2.638 | 0.0136 | 213817_at    | interleukin-1 receptor-associated kinase 3                                                                                                                                                                                                                      |
| GFPT1       | 1.062  | 0.0137 | 226886_at    | glutamine--fructose-6-phosphate transaminase 1                                                                                                                                                                                                                  |
| NOSTRIN     | -2.623 | 0.0138 | 226992_at    | nitric oxide synthase trafficker                                                                                                                                                                                                                                |
| ST6GALNAC3  | -1.806 | 0.0138 | 235334_at    | ST6 (alpha-N-acetyl-neuraminyl-2,3-beta-galactosyl-1,3)-N-acetylgalactosaminide alpha-2,6-sialyltransferase 3                                                                                                                                                   |
| FXR1        | 0.712  | 0.0138 | 229519_at    | fragile X mental retardation, autosomal homolog 1                                                                                                                                                                                                               |
| RAD50       | 1.15   | 0.0138 | 208393_s_at  | RAD50 homolog (S. cerevisiae)                                                                                                                                                                                                                                   |
| RPL23AP7    | 0.683  | 0.0139 | 221634_at    | 60S ribosomal protein L23a-like /// ribosomal protein L23a pseudogene /// uncharacterized LOC100508047 /// 60S ribosomal protein L23a-like /// uncharacterized LOC100653267 /// CENPB DNA-binding domains containing 1 pseudogene /// ribosomal protein L23a ps |
| SLC25A25    | -1.596 | 0.0139 | 225212_at    | solute carrier family 25 (mitochondrial carrier; phosphate carrier), member 25                                                                                                                                                                                  |
| SRSF9       | 0.774  | 0.0139 | 200044_at    | glutamyl-tRNA(Gln) amidotransferase, subunit C homolog (bacterial) /// serine/arginine-rich splicing factor 9                                                                                                                                                   |



|             |        |        |             |                                                                                                                                              |
|-------------|--------|--------|-------------|----------------------------------------------------------------------------------------------------------------------------------------------|
| PCDHGA10    | 0.871  | 0.0139 | 211875_x_at | protocadherin gamma subfamily A, 10                                                                                                          |
| BBS7        | -0.957 | 0.0139 | 235007_at   | Bardet-Biedl syndrome 7                                                                                                                      |
| MRPL28      | 0.686  | 0.0139 | 204599_s_at | mitochondrial ribosomal protein L28                                                                                                          |
| TOR1A       | 0.653  | 0.014  | 202349_at   | torsin family 1, member A (torsin A)                                                                                                         |
| PTPLAD1     | 0.991  | 0.014  | 234000_s_at | protein tyrosine phosphatase-like A domain containing 1                                                                                      |
| EPHA3       | -3.496 | 0.014  | 206670_s_at | EPH receptor A3                                                                                                                              |
| DHX29       | 0.517  | 0.014  | 212648_at   | DEAH (Asp-Glu-Ala-His) box polypeptide 29                                                                                                    |
| PCDHGA8     | 0.692  | 0.014  | 210368_at   | protocadherin gamma subfamily A, 8                                                                                                           |
| KDM4A       | 0.844  | 0.014  | 203204_s_at | lysine (K)-specific demethylase 4A                                                                                                           |
| KIAA1524    | 1.731  | 0.014  | 231855_at   | KIAA1524                                                                                                                                     |
| GUCY1A3     | -1.983 | 0.014  | 227235_at   | guanylate cyclase 1, soluble, alpha 3                                                                                                        |
| RRP7A       | 0.915  | 0.014  | 202937_x_at | ribosomal RNA processing 7 homolog A (S. cerevisiae)                                                                                         |
| SLC9A7      | 2.216  | 0.014  | 226550_at   | solute carrier family 9, subfamily A (NHE7, cation proton antiporter 7), member 7                                                            |
| KLF11       | -1.269 | 0.0141 | 218486_at   | Kruppel-like factor 11                                                                                                                       |
| PPP1R16B    | -1.736 | 0.0141 | 41577_at    | protein phosphatase 1, regulatory subunit 16B                                                                                                |
| RBPMS       | -1.07  | 0.0141 | 209487_at   | RNA binding protein with multiple splicing                                                                                                   |
| NOL7        | 0.53   | 0.0141 | 202882_x_at | nucleolar protein 7, 27kDa                                                                                                                   |
| SPCS2       | 0.584  | 0.0141 | 201240_s_at | signal peptidase complex subunit 2 homolog (S. cerevisiae) pseudogene /// signal peptidase complex subunit 2 homolog (S. cerevisiae)         |
| UQC         | 0.938  | 0.0141 | 222470_s_at | ubiquinol-cytochrome c reductase complex chaperone                                                                                           |
| MRV1L       | -1.82  | 0.0142 | 226047_at   | murine retrovirus integration site 1 homolog                                                                                                 |
| ABCA11P     | -0.976 | 0.0142 | 220159_at   | ATP-binding cassette, sub-family A (ABC1), member 11, pseudogene                                                                             |
| RSPRY1      | 1.619  | 0.0142 | 225774_at   | ring finger and SPRY domain containing 1                                                                                                     |
| ADAMTS9     | -2.741 | 0.0142 | 220287_at   | ADAM metalloproteinase with thrombospondin type 1 motif, 9                                                                                   |
| PTGER4      | -1.656 | 0.0142 | 204897_at   | prostaglandin E receptor 4 (subtype EP4)                                                                                                     |
| PRPF19      | 0.858  | 0.0142 | 203103_s_at | PRP19/PSO4 pre-mRNA processing factor 19 homolog (S. cerevisiae)                                                                             |
| FANCI       | 2.283  | 0.0142 | 213008_at   | Fanconi anemia, complementation group 1                                                                                                      |
| CCDC167     | 0.725  | 0.0142 | 225723_at   | coiled-coil domain containing 167                                                                                                            |
| AVIL        | -0.958 | 0.0143 | 233333_x_at | advillin                                                                                                                                     |
| UBE2V2      | 0.542  | 0.0143 | 209096_at   | ubiquitin-conjugating enzyme E2 variant 2                                                                                                    |
| COP58       | 0.608  | 0.0143 | 214260_at   | COP9 constitutive photomorphogenic homolog subunit 8 (Arabidopsis)                                                                           |
| MAML3       | -1.252 | 0.0143 | 242794_at   | mastermind-like 3 (Drosophila)                                                                                                               |
| NIN         | -0.701 | 0.0143 | 225921_at   | ninein (GSK3B interacting protein)                                                                                                           |
| PSMCS       | 0.563  | 0.0143 | 209503_s_at | proteasome (prosome, macropain) 26S subunit, ATPase, 5                                                                                       |
| SRM         | 1.46   | 0.0144 | 201516_at   | spermidine synthase                                                                                                                          |
| GABPB1-AS1  | 1.157  | 0.0144 | 227406_at   | GABPB1 antisense RNA 1 (non-protein coding)                                                                                                  |
| RFC5        | 1.185  | 0.0144 | 203209_at   | replication factor C (activator 1) 5, 36.5kDa                                                                                                |
| USP31       | 2.052  | 0.0144 | 1558117_s   | ubiquitin specific peptidase 31                                                                                                              |
| NR1D2       | -2.232 | 0.0144 | 225768_at   | nuclear receptor subfamily 1, group D, member 2                                                                                              |
| FUNDC1      | 0.474  | 0.0144 | 235346_at   | FUN14 domain containing 1                                                                                                                    |
| FIGN        | -1.873 | 0.0145 | 238964_at   | fidgetin                                                                                                                                     |
| NAALADL1    | -1.609 | 0.0145 | 228424_at   | N-acetylated alpha-linked acidic dipeptidase-like 1                                                                                          |
| EPB41L4A    | 0.686  | 0.0145 | 220119_at   | erythrocyte membrane protein band 4.1 like 4A                                                                                                |
| PDF         | 0.705  | 0.0145 | 219575_s_at | component of oligomeric golgi complex 8 /// peptide deformylase (mitochondrial)                                                              |
| ISG20       | 1.985  | 0.0145 | 204698_at   | interferon stimulated exonuclease gene 20kDa                                                                                                 |
| SHE         | -1.856 | 0.0146 | 229910_at   | Src homology 2 domain containing E                                                                                                           |
| GIMAP1      | -2.399 | 0.0147 | 236583_at   | GTPase, IMAP family member 1                                                                                                                 |
| GJA4        | -1.872 | 0.0147 | 40687_at    | gap junction protein, alpha 4, 37kDa                                                                                                         |
| RBBP9       | -1.067 | 0.0147 | 226696_at   | retinoblastoma binding protein 9                                                                                                             |
| ATG3        | 0.644  | 0.0147 | 221492_s_at | autophagy related 3                                                                                                                          |
| SCAMP1      | 0.811  | 0.0147 | 206668_s_at | secretory carrier membrane protein 1                                                                                                         |
| HBEFG       | -2.485 | 0.0148 | 203821_at   | heparin-binding EGF-like growth factor                                                                                                       |
| FAM198B     | -1.593 | 0.0148 | 223204_at   | family with sequence similarity 198, member B                                                                                                |
| UEVLD       | 0.749  | 0.0148 | 220775_s_at | UEV and lactate/malate dehydrogenase domains                                                                                                 |
| WAPAL       | 0.375  | 0.0148 | 212267_at   | wings apart-like homolog (Drosophila)                                                                                                        |
| B3GALTL     | -1.331 | 0.0148 | 227083_at   | beta 1,3-galactosyltransferase-like                                                                                                          |
| ADPRHL2     | 0.756  | 0.0148 | 223097_at   | ADP-ribosylhydrolase like 2                                                                                                                  |
| ADRBK2      | -2.168 | 0.0148 | 228771_at   | adrenergic, beta, receptor kinase 2                                                                                                          |
| LOC10028909 | -1.043 | 0.0148 | 215160_x_at | protein FRG1-like                                                                                                                            |
| CBX6        | -0.773 | 0.0148 | 202047_s_at | chromobox homolog 6                                                                                                                          |
| STK4        | -0.636 | 0.0148 | 223746_at   | serine/threonine kinase 4                                                                                                                    |
| BBS4        | 0.711  | 0.0148 | 212745_s_at | Bardet-Biedl syndrome 4                                                                                                                      |
| TTC9C       | 1.055  | 0.0148 | 226175_at   | tetratricopeptide repeat domain 9C                                                                                                           |
| DPP3        | 1.276  | 0.0148 | 218567_x_at | dipeptidyl-peptidase 3                                                                                                                       |
| SNORA11E    | 1.617  | 0.0148 | 223313_s_at | melanoma antigen family D, 4 /// melanoma antigen family D, 4B /// small nucleolar RNA, H/ACA box 11D /// small nucleolar RNA, H/ACA box 11E |
| ARHGEF4     | 2.091  | 0.0148 | 205109_s_at | Rho guanine nucleotide exchange factor (GEF) 4                                                                                               |
| FCGBP       | 3.461  | 0.0148 | 203240_at   | Fc fragment of IgG binding protein                                                                                                           |
| UNC5B       | 1.55   | 0.0149 | 213100_at   | unc-5 homolog B (C. elegans)                                                                                                                 |
| TENC1       | -1.8   | 0.0149 | 212494_at   | tensin like C1 domain containing phosphatase (tensin 2)                                                                                      |
| LOC728377   | 0.943  | 0.0149 | 228596_at   | Rho guanine nucleotide exchange factor (GEF) 5 pseudogene                                                                                    |
| BAI2        | 1.068  | 0.0149 | 204966_at   | brain-specific angiogenesis inhibitor 2                                                                                                      |
| LOC339803   | 1.457  | 0.0149 | 227941_at   | uncharacterized LOC339803                                                                                                                    |
| ACTL6A      | 0.597  | 0.0149 | 202666_s_at | actin-like 6A                                                                                                                                |
| RPS10-NUDT3 | 0.672  | 0.015  | 221579_s_at | nudix (nucleoside diphosphate linked moiety X)-type motif 3 /// RPS10-NUDT3 readthrough                                                      |
| CYP39A1     | -2.392 | 0.015  | 1553977_a   | cytochrome P450, family 39, subfamily A, polypeptide 1                                                                                       |
| C12orf65    | 0.959  | 0.0151 | 223476_s_at | chromosome 12 open reading frame 65                                                                                                          |

|             |        |        |             |                                                                                                                    |
|-------------|--------|--------|-------------|--------------------------------------------------------------------------------------------------------------------|
| SRGAP1      | 1.271  | 0.0151 | 233888_s_at | SLIT-ROBO Rho GTPase activating protein 1                                                                          |
| ANXA2       | 0.595  | 0.0151 | 201590_x_at | annexin A2                                                                                                         |
| CNOT6L      | -0.638 | 0.0151 | 227119_at   | CCR4-NOT transcription complex, subunit 6-like                                                                     |
| ALG8        | 0.92   | 0.0151 | 203545_at   | asparagine-linked glycosylation 8, alpha-1,3-glucosyltransferase homolog (S. cerevisiae)                           |
| TP53INP2    | -1.22  | 0.0151 | 224836_at   | tumor protein p53 inducible nuclear protein 2                                                                      |
| ZNF641      | 1.259  | 0.0151 | 226509_at   | zinc finger protein 641                                                                                            |
| TYMS        | 2.384  | 0.0151 | 202589_at   | thymidylate synthetase                                                                                             |
| MIR143HG    | -1.677 | 0.0151 | 231987_at   | MIR143 host gene (non-protein coding)                                                                              |
| CLCN7       | 0.549  | 0.0151 | 38069_at    | chloride channel, voltage-sensitive 7                                                                              |
| NAA38       | 0.482  | 0.0151 | 219119_at   | N(alpha)-acetyltransferase 38, NatC auxiliary subunit                                                              |
| GPMA6       | -4.373 | 0.0151 | 209470_s_at | glycoprotein M6A                                                                                                   |
| CELF1       | 0.812  | 0.0151 | 204113_at   | CUGBP, Elav-like family member 1                                                                                   |
| BRI3BP      | 0.838  | 0.0152 | 225716_at   | BRI3 binding protein                                                                                               |
| CD40        | -0.987 | 0.0152 | 222292_at   | CD40 molecule, TNF receptor superfamily member 5                                                                   |
| KDM6B       | -0.567 | 0.0152 | 41386_i_at  | lysine (K)-specific demethylase 6B                                                                                 |
| POLR3B      | 0.923  | 0.0152 | 219459_at   | polymerase (RNA) III (DNA directed) polypeptide B                                                                  |
| AARS        | 0.654  | 0.0152 | 201000_at   | alanyl-tRNA synthetase                                                                                             |
| PNO1        | 1.212  | 0.0152 | 203622_s_at | partner of NOB1 homolog (S. cerevisiae)                                                                            |
| TMPPRS3     | 3.508  | 0.0152 | 223949_at   | transmembrane protease, serine 3                                                                                   |
| DUSP1       | -2.528 | 0.0153 | 201041_s_at | dual specificity phosphatase 1                                                                                     |
| EIF2S1      | 0.768  | 0.0153 | 201144_s_at | eukaryotic translation initiation factor 2, subunit 1 alpha, 35kDa                                                 |
| LOC653739   | 0.821  | 0.0153 | 220949_s_at | chromosome 7 open reading frame 49 /// uncharacterized LOC653739                                                   |
| TMEM39A     | 0.89   | 0.0154 | 218615_s_at | transmembrane protein 39A                                                                                          |
| TH1L        | 0.86   | 0.0154 | 220607_x_at | TH1-like (Drosophila)                                                                                              |
| PRKDC       | 0.897  | 0.0154 | 210543_s_at | protein kinase, DNA-activated, catalytic polypeptide                                                               |
| PRRC1       | 1.12   | 0.0154 | 221734_at   | proline-rich coiled-coil 1                                                                                         |
| ASPM        | 4.173  | 0.0157 | 219918_s_at | asp (abnormal spindle) homolog, microcephaly associated (Drosophila)                                               |
| SUCNR1      | -2.639 | 0.0157 | 223939_at   | succinate receptor 1                                                                                               |
| RAI2        | -1.926 | 0.0157 | 219440_at   | retinoic acid induced 2                                                                                            |
| LOC10012950 | -1.084 | 0.0157 | 228791_at   | uncharacterized LOC10012950                                                                                        |
| ARHGEF1     | -0.746 | 0.0157 | 203055_s_at | Rho guanine nucleotide exchange factor (GEF) 1                                                                     |
| NUTF2       | 0.851  | 0.0157 | 202397_at   | nuclear transport factor 2-like /// nuclear transport factor 2                                                     |
| C5orf42     | 2.206  | 0.0157 | 219381_at   | chromosome 5 open reading frame 42                                                                                 |
| MOB3B       | -1.812 | 0.0157 | 226844_at   | MOB kinase activator 3B                                                                                            |
| FOXO3       | -0.715 | 0.0157 | 224891_at   | forkhead box O3                                                                                                    |
| TMEM136     | 1.347  | 0.0157 | 238497_at   | transmembrane protein 136                                                                                          |
| KLF10       | -1.078 | 0.0158 | 202393_s_at | Kruppel-like factor 10                                                                                             |
| PUF60       | 0.819  | 0.0158 | 209899_s_at | poly-U binding splicing factor 60kDa                                                                               |
| DARC        | -3.14  | 0.0158 | 208335_s_at | Duffy blood group, chemokine receptor                                                                              |
| DCTPP1      | 0.733  | 0.0158 | 218069_at   | dCTP pyrophosphatase 1                                                                                             |
| MEF2C       | -1.603 | 0.0159 | 209200_at   | myocyte enhancer factor 2C                                                                                         |
| NQO1        | 2.48   | 0.0159 | 210519_s_at | NAD(P)H dehydrogenase, quinone 1                                                                                   |
| PAM         | -0.919 | 0.0159 | 202336_s_at | peptidylglycine alpha-amidating monooxygenase                                                                      |
| GINS2       | 2.164  | 0.0159 | 221521_s_at | GINS complex subunit 2 (Psf2 homolog)                                                                              |
| AFAP1-AS1   | 3.089  | 0.016  | 223779_at   | AFAP1 antisense RNA 1 (non-protein coding)                                                                         |
| MRPL13      | 1.099  | 0.016  | 218049_s_at | uncharacterized LOC100506980 /// mitochondrial ribosomal protein L13                                               |
| CPSF3       | 0.616  | 0.0161 | 225082_at   | cleavage and polyadenylation specific factor 3, 73kDa                                                              |
| CEP112      | -1.086 | 0.0161 | 213644_at   | centrosomal protein 112kDa                                                                                         |
| BCL2L2      | -0.765 | 0.0162 | 209311_at   | BCL2-like 2                                                                                                        |
| ATOH8       | -1.876 | 0.0163 | 228890_at   | atonal homolog 8 (Drosophila)                                                                                      |
| SMTN        | -1.281 | 0.0163 | 207390_s_at | smoothelin                                                                                                         |
| PSMA1       | 0.562  | 0.0163 | 201676_x_at | proteasome (prosome, macropain) subunit, alpha type, 1                                                             |
| VPS35       | 0.709  | 0.0163 | 222388_s_at | vacuolar protein sorting 35 homolog (S. cerevisiae)                                                                |
| DNAJC10     | 0.987  | 0.0163 | 221782_at   | DnaJ (Hsp40) homolog, subfamily C, member 10                                                                       |
| HPS5        | 1.256  | 0.0163 | 204544_at   | Hermansky-Pudlak syndrome 5                                                                                        |
| LOC646903   | 2.029  | 0.0163 | 237116_at   | uncharacterized LOC646903                                                                                          |
| ZNF664-FAM1 | 2.674  | 0.0164 | 227320_at   | family with sequence similarity 101, member A /// protein FAM101A                                                  |
| GOLGB1      | 0.468  | 0.0165 | 201057_s_at | golgin B1                                                                                                          |
| ZNF271      | 0.843  | 0.0165 | 211009_s_at | zinc finger protein 271                                                                                            |
| LMAN2       | 1.126  | 0.0165 | 200805_at   | lectin, mannose-binding 2                                                                                          |
| FKBP2       | 0.874  | 0.0165 | 203391_at   | FK506 binding protein 2, 13kDa                                                                                     |
| CCL3L3      | -2.768 | 0.0166 | 205114_s_at | chemokine (C-C motif) ligand 3 /// chemokine (C-C motif) ligand 3-like 1 /// chemokine (C-C motif) ligand 3-like 2 |
| PPTC7       | -0.673 | 0.0166 | 225213_at   | PTC7 protein phosphatase homolog (S. cerevisiae)                                                                   |
| ARL2BP      | 0.812  | 0.0166 | 202092_s_at | ADP-ribosylation factor-like 2 binding protein                                                                     |
| PEX13       | 0.831  | 0.0166 | 1556009_at  | peroxisomal biogenesis factor 13                                                                                   |
| KIF23       | 3.359  | 0.0167 | 204709_s_at | kinesin family member 23                                                                                           |
| TMED9       | 1.087  | 0.0167 | 208757_at   | transmembrane emp24 protein transport domain containing 9                                                          |
| NR4A1       | -3.449 | 0.0167 | 202340_x_at | nuclear receptor subfamily 4, group A, member 1                                                                    |
| NBAS        | 0.502  | 0.0167 | 202926_at   | neuroblastoma amplified sequence                                                                                   |
| KDELR2      | 0.834  | 0.0167 | 200699_at   | KDEL (Lys-Asp-Glu-Leu) endoplasmic reticulum protein retention receptor 2                                          |
| THSD7A      | -2.116 | 0.0167 | 214920_at   | thrombospondin, type 1, domain containing 7A                                                                       |
| SPRY2       | -1.473 | 0.0167 | 204011_at   | sprouty homolog 2 (Drosophila)                                                                                     |
| EP300       | -0.715 | 0.0167 | 213579_s_at | E1A binding protein p300                                                                                           |
| FOXP1       | -0.624 | 0.0167 | 229844_at   | forkhead box P1                                                                                                    |
| EIF2AK1     | 0.655  | 0.0167 | 217736_s_at | eukaryotic translation initiation factor 2-alpha kinase 1                                                          |

|             |        |        |             |                                                                                                          |
|-------------|--------|--------|-------------|----------------------------------------------------------------------------------------------------------|
| TMEM41A     | 0.72   | 0.0167 | 225991_at   | transmembrane protein 41A                                                                                |
| GLIS2       | 0.766  | 0.0167 | 223378_at   | GLIS family zinc finger 2                                                                                |
| NIF3L1      | 0.845  | 0.0167 | 218133_s_at | NIF3 NGG1 interacting factor 3-like 1 (S. cerevisiae)                                                    |
| KPNA1       | 1.401  | 0.0167 | 202058_s_at | karyopherin alpha 1 (importin alpha 5)                                                                   |
| NPAS2       | 1.739  | 0.0167 | 39549_at    | neuronal PAS domain protein 2                                                                            |
| CCNB1       | 2.961  | 0.0167 | 228729_at   | cyclin B1                                                                                                |
| SASH1       | -1.114 | 0.0167 | 226022_at   | SAM and SH3 domain containing 1                                                                          |
| CD97        | -1.549 | 0.0168 | 202910_s_at | CD97 molecule                                                                                            |
| MSH6        | 0.873  | 0.0168 | 202911_at   | mutS homolog 6 (E. coli)                                                                                 |
| KLHL3       | -1.911 | 0.0169 | 221221_s_at | kelch-like 3 (Drosophila)                                                                                |
| C2orf29     | 0.57   | 0.0169 | 224695_at   | chromosome 2 open reading frame 29                                                                       |
| INPP4B      | -2.113 | 0.0169 | 235046_at   | inositol polyphosphate-4-phosphatase, type II, 105kDa                                                    |
| GAPDH       | 1.449  | 0.0169 | MGAPDH/M331 | glyceraldehyde-3-phosphate dehydrogenase /// glyceraldehyde-3-phosphate dehydrogenase                    |
| CENPBBD1    | 0.886  | 0.0169 | 1552330_at  | CENPB DNA-binding domains containing 1                                                                   |
| CYR61       | -2.336 | 0.0169 | 201289_at   | cysteine-rich, angiogenic inducer, 61                                                                    |
| CLEC14A     | -2.125 | 0.0169 | 226244_at   | C-type lectin domain family 14, member A                                                                 |
| MRPL9       | 0.731  | 0.017  | 211594_s_at | mitochondrial ribosomal protein L9                                                                       |
| PIH1        | 0.593  | 0.0171 | 204228_at   | peptidylprolyl isomerase H (cyclophilin H)                                                               |
| LOC10065328 | 0.692  | 0.0171 | 218003_s_at | FK506 binding protein 3, 25kDa /// uncharacterized LOC100652866 /// uncharacterized LOC100653280         |
| CEX3        | 0.486  | 0.0172 | 200037_s_at | chromobox homolog 3                                                                                      |
| XPOT        | 0.831  | 0.0172 | 212160_at   | exportin, tRNA (nuclear export receptor for tRNAs)                                                       |
| TMED7-TICAM | 0.555  | 0.0173 | 214658_at   | transmembrane emp24 protein transport domain containing 7 /// TMED7-TICAM2 readthrough                   |
| FOS         | -4.873 | 0.0173 | 209189_at   | FBJ murine osteosarcoma viral oncogene homolog                                                           |
| ACE         | -2.904 | 0.0173 | 227463_at   | angiotensin I converting enzyme (peptidyl-dipeptidase A) 1                                               |
| NSAMT1      | 0.439  | 0.0173 | 220311_at   | N-6 adenine-specific DNA methyltransferase 1 (putative)                                                  |
| GTPBP5      | 0.653  | 0.0173 | 226854_at   | GTP binding protein 5 (putative)                                                                         |
| NHLRC3      | 0.793  | 0.0173 | 236953_s_at | NHL repeat containing 3                                                                                  |
| CD69        | -3.09  | 0.0173 | 209795_at   | CD69 molecule                                                                                            |
| SPATA7      | -0.768 | 0.0173 | 219583_s_at | spermatogenesis associated 7                                                                             |
| RNF111      | 0.524  | 0.0173 | 218761_at   | ring finger protein 111                                                                                  |
| EMC8        | 0.725  | 0.0173 | 218057_x_at | ER membrane protein complex subunit 8                                                                    |
| ABHD16A     | 0.341  | 0.0174 | 230221_at   | abhydrolase domain containing 16A                                                                        |
| TRMT1L      | 0.772  | 0.0174 | 223404_s_at | tRNA methyltransferase 1 homolog (S. cerevisiae)-like                                                    |
| RAB6A       | 0.628  | 0.0174 | 201047_x_at | RAB6A, member RAS oncogene family                                                                        |
| SELRC1      | 1.316  | 0.0174 | 219420_s_at | SeI1 repeat containing 1                                                                                 |
| CARD6       | -1.266 | 0.0175 | 224414_s_at | caspase recruitment domain family, member 6                                                              |
| FLJ42709    | -1.849 | 0.0176 | 1556695_a   | uncharacterized LOC441094                                                                                |
| MBNL1       | -0.549 | 0.0176 | 201153_s_at | muscleblind-like splicing regulator 1                                                                    |
| LGALS1      | -1.147 | 0.0176 | 226188_at   | lectin, galactoside-binding-like                                                                         |
| FUT4        | -0.954 | 0.0176 | 209892_at   | fucosyltransferase 4 (alpha (1,3) fucosyltransferase, myeloid-specific)                                  |
| COPB1       | 0.331  | 0.0176 | 201358_s_at | coatomer protein complex, subunit beta 1                                                                 |
| HEATR1      | 0.82   | 0.0176 | 218594_at   | HEAT repeat containing 1                                                                                 |
| ENO1        | 1.481  | 0.0176 | 201231_s_at | enolase 1, (alpha)                                                                                       |
| NAV3        | -2.154 | 0.0177 | 204823_at   | neuron navigator 3                                                                                       |
| ZNF107      | 1.225  | 0.0178 | 205739_x_at | zinc finger protein 107                                                                                  |
| FLT1        | -1.662 | 0.0178 | 222033_s_at | fms-related tyrosine kinase 1 (vascular endothelial growth factor/vascular permeability factor receptor) |
| ARHGAP25    | -1.605 | 0.0178 | 204882_at   | Rho GTPase activating protein 25                                                                         |
| DIAPH2      | -1.555 | 0.0178 | 205726_at   | diaphanous homolog 2 (Drosophila)                                                                        |
| FBXO21      | 1.279  | 0.0178 | 212229_s_at | F-box protein 21                                                                                         |
| LRCH2       | -2.21  | 0.0178 | 227688_at   | leucine-rich repeats and calponin homology (CH) domain containing 2                                      |
| EIF4E3      | -1.401 | 0.0178 | 225939_at   | eukaryotic translation initiation factor 4E family member 3                                              |
| EIF2S2      | 0.656  | 0.0178 | 208725_at   | eukaryotic translation initiation factor 2, subunit 2 beta, 38kDa                                        |
| TRIOBP      | -1.082 | 0.0179 | 243690_at   | TRIO and F-actin binding protein                                                                         |
| KLF8        | -2.124 | 0.018  | 230986_at   | Kruppel-like factor 8                                                                                    |
| TCEAL7      | -1.937 | 0.018  | 227705_at   | transcription elongation factor A (SII)-like 7                                                           |
| SCN7A       | -4.217 | 0.018  | 228504_at   | sodium channel, voltage-gated, type VII, alpha subunit                                                   |
| GNAS-AS1    | 1.419  | 0.018  | 232881_at   | GNAS antisense RNA 1 (non-protein coding)                                                                |
| NAA25       | 0.648  | 0.018  | 225888_at   | N(alpha)-acetyltransferase 25, NatB auxiliary subunit                                                    |
| CGRRF1      | -0.723 | 0.018  | 204605_at   | cell growth regulator with ring finger domain 1                                                          |
| ARL1        | 0.887  | 0.0181 | 201657_at   | ADP-ribosylation factor-like 1                                                                           |
| NGRN        | 0.771  | 0.0182 | 217722_s_at | neugrin, neurite outgrowth associated                                                                    |
| PDRG1       | 0.874  | 0.0182 | 225075_at   | p53 and DNA-damage regulated 1                                                                           |
| MALT1       | -0.673 | 0.0182 | 210017_at   | mucosa associated lymphoid tissue lymphoma translocation gene 1                                          |
| TMEM248     | 0.643  | 0.0182 | 224688_at   | transmembrane protein 248                                                                                |
| ZMPSTE24    | 0.588  | 0.0183 | 202939_at   | zinc metalloproteinase STE24 homolog (S. cerevisiae)                                                     |
| SH2D3C      | -1.63  | 0.0184 | 226673_at   | SH2 domain containing 3C                                                                                 |
| PCSK5       | -1.479 | 0.0184 | 213652_at   | proprotein convertase subtilisin/kexin type 5                                                            |
| ICMT        | 0.575  | 0.0184 | 201611_s_at | isoprenylcysteine carboxyl methyltransferase                                                             |
| DGUOK       | 0.791  | 0.0184 | 209549_s_at | deoxyguanosine kinase                                                                                    |
| GPC1        | 1.906  | 0.0184 | 202756_s_at | glypican 1                                                                                               |
| KIAA1109    | -0.824 | 0.0184 | 212779_at   | KIAA1109                                                                                                 |
| EMC9        | 1.153  | 0.0184 | 219203_at   | ER membrane protein complex subunit 9                                                                    |
| SFXN1       | 1.432  | 0.0184 | 218392_x_at | sideroflexin 1                                                                                           |
| GPR183      | -2.177 | 0.0185 | 205419_at   | G protein-coupled receptor 183                                                                           |
| CKAP4       | 1.61   | 0.0186 | 200998_s_at | cytoskeleton-associated protein 4                                                                        |

|           |        |        |             |                                                                                                                   |
|-----------|--------|--------|-------------|-------------------------------------------------------------------------------------------------------------------|
| LOC338758 | -1.301 | 0.0187 | 238893_at   | uncharacterized LOC338758                                                                                         |
| DLEU2     | 1.047  | 0.0187 | 216870_x_at | deleted in lymphocytic leukemia 2 (non-protein coding)                                                            |
| CPEB4     | -0.75  | 0.0187 | 224831_at   | cytoplasmic polyadenylation element binding protein 4                                                             |
| POLR2D    | 0.514  | 0.0187 | 214144_at   | polymerase (RNA) II (DNA directed) polypeptide D                                                                  |
| ASUN      | 0.761  | 0.0188 | 221652_s_at | asunder, spermatogenesis regulator homolog (Drosophila)                                                           |
| JUNB      | -2.48  | 0.0188 | 201473_at   | jun B proto-oncogene                                                                                              |
| POU6F1    | -1.091 | 0.0188 | 205878_at   | POU class 6 homeobox 1                                                                                            |
| DIABLO    | 0.829  | 0.0188 | 219350_s_at | diablo, IAP-binding mitochondrial protein                                                                         |
| HSPE1     | 1.075  | 0.0188 | 205133_s_at | heat shock 10kDa protein 1 (chaperonin 10)                                                                        |
| CBFA2T3   | -1.488 | 0.0189 | 208056_s_at | core-binding factor, runt domain, alpha subunit 2; translocated to, 3                                             |
| ISY1      | 0.389  | 0.0189 | 223428_s_at | ISY1 splicing factor homolog (S. cerevisiae)                                                                      |
| TBK1      | 0.436  | 0.0189 | 218520_at   | TANK-binding kinase 1                                                                                             |
| ATXN7L1   | -0.74  | 0.0189 | 227732_at   | ataxin 7-like 1                                                                                                   |
| MLEC      | 1.127  | 0.0189 | 200616_s_at | malectin                                                                                                          |
| S1PR4     | -0.422 | 0.019  | 206437_at   | sphingosine-1-phosphate receptor 4                                                                                |
| OSBPL1A   | -1.467 | 0.0191 | 209485_s_at | oxysterol binding protein-like 1A                                                                                 |
| FAM105B   | 0.94   | 0.0191 | 229268_at   | family with sequence similarity 105, member B                                                                     |
| HECW2     | -2.349 | 0.0191 | 232080_at   | HECT, C2 and WW domain containing E3 ubiquitin protein ligase 2                                                   |
| PAK6      | 0.607  | 0.0191 | 219461_at   | p21 protein (Cdc42/Rac)-activated kinase 6                                                                        |
| MRPS16    | 0.777  | 0.0191 | 222499_at   | uncharacterized LOC100652993 /// uncharacterized LOC100653136 /// mitochondrial ribosomal protein S16             |
| DEPOC1    | 2.141  | 0.0191 | 235545_at   | DEP domain containing 1                                                                                           |
| COPS7B    | 0.853  | 0.0191 | 225696_at   | COP9 constitutive photomorphogenic homolog subunit 7B (Arabidopsis)                                               |
| ALYREF    | 1.345  | 0.0193 | 226320_at   | Aly/REF export factor                                                                                             |
| HSBP1     | 0.816  | 0.0193 | 200942_s_at | heat shock factor binding protein 1                                                                               |
| SURF4     | 1.067  | 0.0195 | 222979_s_at | surfeit 4                                                                                                         |
| CSRN3     | -1.219 | 0.0195 | 235017_s_at | cysteine-serine-rich nuclear protein 3                                                                            |
| IL17RA    | -1.02  | 0.0195 | 229101_at   | interleukin 17 receptor A                                                                                         |
| PTGES3    | 0.535  | 0.0195 | 200627_at   | uncharacterized LOC100506732 /// prostaglandin E synthase 3 (cytosolic)                                           |
| MARS      | 0.625  | 0.0195 | 213671_s_at | methionyl-tRNA synthetase                                                                                         |
| TMEM141   | 1.185  | 0.0195 | 225568_at   | transmembrane protein 141                                                                                         |
| CCNB2     | 3.159  | 0.0195 | 202705_at   | cyclin B2                                                                                                         |
| ADPRH     | -1.554 | 0.0196 | 228042_at   | ADP-ribosylarginine hydrolase                                                                                     |
| UBA5      | 0.702  | 0.0196 | 222579_at   | ubiquitin-like modifier activating enzyme 5                                                                       |
| HAX1      | 0.778  | 0.0196 | 201145_at   | HCLS1 associated protein X-1                                                                                      |
| CUL5      | 0.529  | 0.0196 | 203531_at   | cullin 5                                                                                                          |
| DNAJB14   | -0.641 | 0.0198 | 226399_at   | DnaJ (Hsp40) homolog, subfamily B, member 14                                                                      |
| OTUB1     | 0.703  | 0.0199 | 201245_s_at | OTU domain, ubiquitin aldehyde binding 1                                                                          |
| RPRD1A    | 1.425  | 0.0199 | 218209_s_at | regulation of nuclear pre-mRNA domain containing 1A                                                               |
| SBNO1     | 0.656  | 0.0199 | 218737_at   | strawberry notch homolog 1 (Drosophila)                                                                           |
| MCF2L     | -2.126 | 0.0199 | 212935_at   | MCF.2 cell line derived transforming sequence-like                                                                |
| S1PR1     | -1.757 | 0.02   | 204642_at   | sphingosine-1-phosphate receptor 1                                                                                |
| MAP9      | -1.204 | 0.02   | 228423_at   | microtubule-associated protein 9                                                                                  |
| KIAA1147  | -0.623 | 0.02   | 223162_s_at | KIAA1147                                                                                                          |
| ZFAND3    | 0.721  | 0.02   | 218020_s_at | zinc finger, AN1-type domain 3                                                                                    |
| DDX49     | 0.783  | 0.02   | 210811_s_at | DEAD (Asp-Glu-Ala-Asp) box polypeptide 49                                                                         |
| ZNF92     | 1.371  | 0.02   | 235170_at   | zinc finger protein 92                                                                                            |
| CCL15     | -3.267 | 0.02   | 205392_s_at | chemokine (C-C motif) ligand 14 /// CCL14-CCL15 readthrough /// chemokine (C-C motif) ligand 15                   |
| ARHGEF15  | -1.549 | 0.0201 | 205507_at   | Rho guanine nucleotide exchange factor (GEF) 15                                                                   |
| FAM98A    | 0.698  | 0.0202 | 212333_at   | family with sequence similarity 98, member A                                                                      |
| LHX6      | -2.288 | 0.0203 | 219884_at   | LIM homeobox 6                                                                                                    |
| SOX11     | 1.971  | 0.0204 | 204914_s_at | SRY (sex determining region Y)-box 11                                                                             |
| PSMC1     | 0.398  | 0.0204 | 204219_s_at | proteasome (prosome, macropain) 26S subunit, ATPase, 1                                                            |
| MCAM      | 1.709  | 0.0204 | 211042_x_at | melanoma cell adhesion molecule                                                                                   |
| RASGRP3   | -1.725 | 0.0204 | 205801_s_at | RAS guanyl releasing protein 3 (calcium and DAG-regulated)                                                        |
| MPP7      | -2.626 | 0.0204 | 238778_at   | membrane protein, palmitoylated 7 (MAGUK p55 subfamily member 7)                                                  |
| RCC2      | 0.626  | 0.0204 | 224578_at   | regulator of chromosome condensation 2                                                                            |
| C4orf48   | 1.631  | 0.0204 | 229860_x_at | chromosome 4 open reading frame 48                                                                                |
| MTERF     | 0.483  | 0.0205 | 204871_at   | mitochondrial transcription termination factor                                                                    |
| ABCB4     | -1.628 | 0.0205 | 209994_s_at | ATP-binding cassette, sub-family B (MDR/TAP), member 1 /// ATP-binding cassette, sub-family B (MDR/TAP), member 4 |
| EMG1      | 0.713  | 0.0205 | 209233_at   | EMG1 nucleolar protein homolog (S. cerevisiae)                                                                    |
| ARHGEF7   | -0.756 | 0.0206 | 202548_s_at | Rho guanine nucleotide exchange factor (GEF) 7                                                                    |
| POCS      | 0.655  | 0.0206 | 227267_at   | POCS5 centriolar protein homolog (Chlamydomonas)                                                                  |
| SYTL3     | -1.673 | 0.0207 | 1562255_at  | synaptotagmin-like 3                                                                                              |
| TAF2      | 0.498  | 0.0207 | 209523_at   | TAF2 RNA polymerase II, TATA box binding protein (TBP)-associated factor, 150kDa                                  |
| FGR       | -2.061 | 0.0207 | 208438_s_at | Gardner-Rasheed feline sarcoma viral (v-fgr) oncogene homolog                                                     |
| TRIM24    | 1.162  | 0.0207 | 204391_x_at | tripartite motif containing 24                                                                                    |
| GPX8      | 1.743  | 0.0208 | 227628_at   | glutathione peroxidase 8 (putative)                                                                               |
| SPOCK2    | 1.972  | 0.0208 | 202523_s_at | sparc/osteonectin, cwcv and kazal-like domains proteoglycan (testican) 2                                          |
| KIF14     | 2.765  | 0.0208 | 236641_at   | kinesin family member 14                                                                                          |
| TMEM47    | -1.698 | 0.0208 | 209656_s_at | transmembrane protein 47                                                                                          |
| PSMD11    | 0.757  | 0.0209 | 208777_s_at | proteasome (prosome, macropain) 26S subunit, non-ATPase, 11                                                       |
| PTK2      | 1.658  | 0.0209 | 241453_at   | uncharacterized LOC100653024 /// uncharacterized LOC100653146 /// PTK2 protein tyrosine kinase 2                  |
| BCL2      | -1.144 | 0.0209 | 203685_at   | B-cell CLL/lymphoma 2                                                                                             |
| EHHADH    | -1.414 | 0.0209 | 205222_at   | enoyl-CoA, hydratase/3-hydroxyacyl CoA dehydrogenase                                                              |
| SARNP     | 0.618  | 0.021  | 224914_s_at | SAP domain containing ribonucleoprotein                                                                           |

|             |        |        |              |                                                                                                                                         |
|-------------|--------|--------|--------------|-----------------------------------------------------------------------------------------------------------------------------------------|
| RBM34       | 0.71   | 0.021  | 212591_at    | AT rich interactive domain 4B (RBP1-like) /// RNA binding motif protein 34                                                              |
| DNMT3A      | 0.771  | 0.021  | 222640_at    | DNA (cytosine-5-)-methyltransferase 3 alpha                                                                                             |
| WDR33       | 0.767  | 0.021  | 222763_s_at  | SFT2 domain containing 3 /// WD repeat domain 33                                                                                        |
| CSF2RB      | -1.836 | 0.021  | 205159_at    | colony stimulating factor 2 receptor, beta, low-affinity (granulocyte-macrophage)                                                       |
| TIPRL       | 1.058  | 0.021  | 1554351_a_at | TIP41, TOR signaling pathway regulator-like (S. cerevisiae)                                                                             |
| ARLSA       | 0.657  | 0.0211 | 218150_at    | ADP-ribosylation factor-like 5A                                                                                                         |
| PLN         | -3.377 | 0.0211 | 204940_at    | phospholamban                                                                                                                           |
| SLC16A14    | -2.441 | 0.0211 | 238029_s_at  | solute carrier family 16, member 14 (monocarboxylic acid transporter 14)                                                                |
| LOC10050656 | 0.85   | 0.0211 | 224446_at    | LLP homolog, long-term synaptic facilitation (Aplysia) /// protein LLP homolog                                                          |
| CYP46A1     | -1.254 | 0.0211 | 220331_at    | cytochrome P450, family 46, subfamily A, polypeptide 1                                                                                  |
| CEP85L      | -0.909 | 0.0212 | 228007_at    | centrosomal protein 85kDa-like                                                                                                          |
| MCM6        | 0.721  | 0.0212 | 201930_at    | minichromosome maintenance complex component 6                                                                                          |
| TMED4       | 0.847  | 0.0212 | 224676_at    | transmembrane emp24 protein transport domain containing 4                                                                               |
| TRIP13      | 4.125  | 0.0212 | 204033_at    | thyroid hormone receptor interactor 13                                                                                                  |
| IKBIP       | 1.203  | 0.0212 | 236249_at    | IKKKB interacting protein                                                                                                               |
| TRPV2       | -2.036 | 0.0213 | 219282_s_at  | transient receptor potential cation channel, subfamily V, member 2                                                                      |
| SAMD4B      | -0.981 | 0.0213 | 229871_at    | sterile alpha motif domain containing 4B                                                                                                |
| CCDC149     | -0.403 | 0.0213 | 226141_at    | coiled-coil domain containing 149                                                                                                       |
| DPH2        | 0.464  | 0.0213 | 204514_at    | DPH2 homolog (S. cerevisiae)                                                                                                            |
| PITHD1      | 0.495  | 0.0213 | 223124_s_at  | PITH (C-terminal proteasome-interacting domain of thioredoxin-like) domain containing 1                                                 |
| PPP1R7      | 0.538  | 0.0213 | 201214_s_at  | protein phosphatase 1, regulatory subunit 7                                                                                             |
| ATP5G1      | 0.76   | 0.0213 | 208972_s_at  | ATP synthase, H+ transporting, mitochondrial Fo complex, subunit C1 (subunit 9)                                                         |
| YKT6        | 0.891  | 0.0213 | 217785_s_at  | YKT6 v-SNARE homolog (S. cerevisiae)                                                                                                    |
| DLG5        | 0.903  | 0.0213 | 201681_s_at  | discs, large homolog 5 (Drosophila)                                                                                                     |
| ESPL1       | 1.78   | 0.0213 | 38158_at     | extra spindle pole bodies homolog 1 (S. cerevisiae)                                                                                     |
| SLC6A6      | -1.284 | 0.0213 | 228754_at    | solute carrier family 6 (neurotransmitter transporter, taurine), member 6                                                               |
| CCDC85B     | -1.359 | 0.0213 | 204610_s_at  | coiled-coil domain containing 85B                                                                                                       |
| USP39       | 0.821  | 0.0213 | 217829_s_at  | ubiquitin specific peptidase 39                                                                                                         |
| MYADM       | -1.375 | 0.0214 | 225673_at    | myeloid-associated differentiation marker                                                                                               |
| MID1        | -1.042 | 0.0215 | 203636_at    | midline 1 (Opitz/BBB syndrome)                                                                                                          |
| CAPN7       | 0.656  | 0.0215 | 203357_s_at  | calpain 7                                                                                                                               |
| MALSU1      | 0.513  | 0.0215 | 226385_s_at  | mitochondrial assembly of ribosomal large subunit 1                                                                                     |
| C12orf66    | 0.902  | 0.0215 | 235026_at    | chromosome 12 open reading frame 66                                                                                                     |
| TSN         | 1.184  | 0.0215 | 201504_s_at  | translin                                                                                                                                |
| TFPI        | -2.422 | 0.0217 | 213258_at    | tissue factor pathway inhibitor (lipoprotein-associated coagulation inhibitor)                                                          |
| KRT6C       | 2.191  | 0.0217 | 214580_x_at  | keratin 6A /// keratin 6B /// keratin 6C                                                                                                |
| MYH11       | -3.293 | 0.0217 | 207961_x_at  | myosin, heavy chain 11, smooth muscle                                                                                                   |
| ZNF717      | 0.736  | 0.0217 | 229986_at    | zinc finger protein 717-like /// zinc finger protein 717                                                                                |
| FOSB        | -5.531 | 0.0218 | 202768_at    | FBJ murine osteosarcoma viral oncogene homolog B                                                                                        |
| TRNT1       | 0.528  | 0.0218 | 1552625_a_at | tRNA nucleotidyl transferase, CCA-adding, 1                                                                                             |
| LOC541471   | 1.174  | 0.0219 | 225799_at    | long intergenic non-protein coding RNA 152 /// uncharacterized LOC541471                                                                |
| BAG6        | 0.595  | 0.0219 | 201255_x_at  | BCL2-associated athanogene 6                                                                                                            |
| ABTB2       | 1.048  | 0.0219 | 213497_at    | ankyrin repeat and BTB (POZ) domain containing 2                                                                                        |
| SHFM1       | 0.831  | 0.022  | 202276_at    | split hand/foot malformation (ectrodactyly) type 1                                                                                      |
| IQGAP1      | 0.994  | 0.022  | 200791_s_at  | IQ motif containing GTPase activating protein 1                                                                                         |
| SMARCA4     | 1.05   | 0.022  | 213720_s_at  | SWI/SNF related, matrix associated, actin dependent regulator of chromatin, subfamily a, member 4                                       |
| HIST1H3E    | 2.211  | 0.022  | 236278_at    | Histone cluster 1, H3e                                                                                                                  |
| PELL1       | -1.13  | 0.022  | 218319_at    | pellino E3 ubiquitin protein ligase 1                                                                                                   |
| EDEM3       | 0.706  | 0.0221 | 223243_s_at  | ER degradation enhancer, mannosidase alpha-like 3                                                                                       |
| AP2M1       | 1.03   | 0.0221 | 200613_at    | adaptor-related protein complex 2, mu 1 subunit                                                                                         |
| EGFL7       | -1.674 | 0.0221 | 218825_at    | EGF-like-domain, multiple 7                                                                                                             |
| CREB3L2     | 0.502  | 0.0221 | 212345_s_at  | cAMP responsive element binding protein 3-like 2                                                                                        |
| SPATS2L     | -1.534 | 0.0221 | 215617_at    | spermatogenesis associated, serine-rich 2-like                                                                                          |
| STAT5B      | -1.012 | 0.0221 | 212549_at    | signal transducer and activator of transcription 5B                                                                                     |
| MINOS1      | 0.741  | 0.0221 | 224867_at    | mitochondrial inner membrane organizing system 1                                                                                        |
| CCNO        | 0.635  | 0.0221 | 210021_s_at  | cyclin O                                                                                                                                |
| SF3A1       | -0.503 | 0.0222 | 201356_at    | splicing factor 3a, subunit 1, 120kDa                                                                                                   |
| BUB1        | 2.716  | 0.0222 | 209642_at    | budding uninhibited by benzimidazoles 1 homolog (yeast)                                                                                 |
| DNAJC8      | 0.451  | 0.0222 | 205545_x_at  | DnaJ (Hsp40) homolog, subfamily C, member 8                                                                                             |
| RNF187      | 0.725  | 0.0222 | 212155_at    | ring finger protein 187                                                                                                                 |
| PMS2P1      | 0.822  | 0.0222 | 216843_x_at  | postmeiotic segregation increased 2 pseudogene 1                                                                                        |
| MTFMT       | 1.213  | 0.0222 | 235689_at    | mitochondrial methionyl-tRNA formyltransferase                                                                                          |
| NANOS1      | 1.752  | 0.0222 | 228523_at    | nanos homolog 1 (Drosophila)                                                                                                            |
| HIST1H2BI   | 1.781  | 0.0222 | 210387_at    | histone cluster 1, H2bc /// histone cluster 1, H2be /// histone cluster 1, H2bf /// histone cluster 1, H2bg /// histone cluster 1, H2bi |
| SLC2A1      | 3.128  | 0.0222 | 201250_s_at  | solute carrier family 2 (facilitated glucose transporter), member 1                                                                     |
| IL13RA1     | -0.899 | 0.0222 | 201887_at    | interleukin 13 receptor, alpha 1                                                                                                        |
| SLC2A12     | -1.424 | 0.0222 | 244353_s_at  | solute carrier family 2 (facilitated glucose transporter), member 12                                                                    |
| KIF2C       | 2.431  | 0.0222 | 209408_at    | kinesin family member 2C                                                                                                                |
| PRDM5       | -1.639 | 0.0223 | 235764_at    | PR domain containing 5                                                                                                                  |
| CYTIP       | -1.825 | 0.0223 | 209606_at    | cytohesin 1 interacting protein                                                                                                         |
| ARHGD1B     | -1.301 | 0.0223 | 201288_at    | Rho GDP dissociation inhibitor (GDI) beta                                                                                               |
| METTTL21A   | 1.3    | 0.0223 | 235177_at    | methyltransferase like 21A                                                                                                              |
| EPT1        | 1.194  | 0.0223 | 224888_at    | ethanolaminophosphotransferase 1 (CDP-ethanolamine-specific)                                                                            |
| FLI1        | -1.817 | 0.0224 | 204236_at    | Friend leukemia virus integration 1                                                                                                     |
| PGBD1       | -1.107 | 0.0224 | 235411_at    | piggyBac transposable element derived 1                                                                                                 |

|           |        |        |             |                                                                                                        |
|-----------|--------|--------|-------------|--------------------------------------------------------------------------------------------------------|
| METTL3    | 0.46   | 0.0224 | 212405_s_at | methyltransferase like 13                                                                              |
| LRRFIP1   | -1.161 | 0.0224 | 223492_s_at | leucine rich repeat (in FLII) interacting protein 1                                                    |
| TWFL1     | 0.528  | 0.0225 | 201745_at   | twinfilin, actin-binding protein, homolog 1 (Drosophila)                                               |
| PRKCA     | 1.846  | 0.0225 | 215195_at   | protein kinase C, alpha                                                                                |
| FAIM3     | -2.405 | 0.0225 | 221601_s_at | Fas apoptotic inhibitory molecule 3                                                                    |
| HCFC2     | -0.603 | 0.0226 | 219484_at   | host cell factor C2                                                                                    |
| DAG1      | 0.668  | 0.0226 | 205417_s_at | dystroglycan 1 (dystrophin-associated glycoprotein 1)                                                  |
| IL3RA     | -1.28  | 0.0227 | 206148_at   | interleukin 3 receptor, alpha (low affinity)                                                           |
| SLC52A2   | 1.146  | 0.0227 | 222155_s_at | solute carrier family 52, riboflavin transporter, member 2                                             |
| RAD21     | 1.612  | 0.0227 | 200607_s_at | RAD21 homolog (S. pombe)                                                                               |
| RNGTT     | 0.63   | 0.0227 | 204208_at   | RNA guanylyltransferase and 5'-phosphatase                                                             |
| NR2C2AP   | 1.128  | 0.0227 | 226839_at   | nuclear receptor 2C2-associated protein                                                                |
| TMEM99    | 1.139  | 0.0227 | 226565_at   | transmembrane protein 99                                                                               |
| Sep-15    | 0.495  | 0.0227 | 200902_at   | 15 kDa selenoprotein                                                                                   |
| NUCB2     | 1.977  | 0.0228 | 229838_at   | nucleobindin 2                                                                                         |
| UTP18     | 0.637  | 0.0229 | 203721_s_at | UTP18 small subunit (SSU) processome component homolog (yeast)                                         |
| TIMMDC1   | 0.682  | 0.0229 | 223004_s_at | translocase of inner mitochondrial membrane domain containing 1                                        |
| MAMDC2    | -2.961 | 0.023  | 228885_at   | MAM domain containing 2                                                                                |
| RHBD1     | 0.629  | 0.0231 | 226945_at   | rhomoid domain containing 1                                                                            |
| C16orf45  | -1.478 | 0.0231 | 212736_at   | chromosome 16 open reading frame 45                                                                    |
| PET100    | 0.485  | 0.0231 | 226006_at   | PET100 homolog (S. cerevisiae)                                                                         |
| C14orf149 | 1.19   | 0.0231 | 227699_at   | chromosome 14 open reading frame 149                                                                   |
| YPEL2     | -1.016 | 0.0231 | 227020_at   | yippe-like 2 (Drosophila)                                                                              |
| SHQ1      | 0.593  | 0.0231 | 63009_at    | SHQ1 homolog (S. cerevisiae)                                                                           |
| CHCHD3    | 1.089  | 0.0231 | 217972_at   | coiled-coil-helix-coiled-coil-helix domain containing 3                                                |
| TRIP10    | -1.373 | 0.0232 | 202734_at   | thyroid hormone receptor interactor 10                                                                 |
| PIM3      | -1.06  | 0.0232 | 224739_at   | pim-3 oncogene                                                                                         |
| TRIM8     | -0.869 | 0.0232 | 221012_s_at | tripartite motif containing 8                                                                          |
| C17orf48  | -0.67  | 0.0234 | 223401_at   | chromosome 17 open reading frame 48                                                                    |
| ELAVL1    | 0.708  | 0.0234 | 201726_at   | ELAV (embryonic lethal, abnormal vision, Drosophila)-like 1 (Hu antigen R)                             |
| CUX1      | 1.439  | 0.0234 | 227069_at   | cut-like homeobox 1                                                                                    |
| RDH16     | 2.827  | 0.0234 | 206753_at   | retinol dehydrogenase 16 (all-trans)                                                                   |
| EMP1      | -0.796 | 0.0236 | 201324_at   | epithelial membrane protein 1                                                                          |
| NR3C2     | -2.334 | 0.0237 | 205259_at   | nuclear receptor subfamily 3, group C, member 2                                                        |
| MARK1     | -2.135 | 0.0237 | 226653_at   | MAP/microtubule affinity-regulating kinase 1                                                           |
| HSD11B1   | -1.696 | 0.0237 | 205404_at   | hydroxysteroid (11-beta) dehydrogenase 1                                                               |
| HSD17B11  | -1.277 | 0.0237 | 217989_at   | hydroxysteroid (17-beta) dehydrogenase 11                                                              |
| TRAPP3C11 | -0.507 | 0.0237 | 218179_s_at | trafficking protein particle complex 11                                                                |
| STK32C    | 0.422  | 0.0237 | 230934_at   | uncharacterized LOC100506057 /// serine/threonine kinase 32C                                           |
| ZNF775    | 0.425  | 0.0237 | 228226_s_at | zinc finger protein 775                                                                                |
| DERL1     | 0.583  | 0.0237 | 222543_at   | derlin 1                                                                                               |
| WBSCR16   | 0.788  | 0.0237 | 221247_s_at | RCC1-like G exchanging factor-like /// Williams-Beuren syndrome chromosome region 16                   |
| CBX1      | 0.813  | 0.0237 | 201518_at   | chromobox homolog 1                                                                                    |
| TSSC1     | 1.077  | 0.0237 | 217968_at   | tumor suppressing subtransferable candidate 1                                                          |
| UBXN4     | 1.448  | 0.0237 | 212008_at   | UBX domain protein 4                                                                                   |
| MPZL1     | 2.026  | 0.0237 | 210087_s_at | myelin protein zero-like 1                                                                             |
| C2orf40   | -3.47  | 0.0237 | 223623_at   | chromosome 2 open reading frame 40                                                                     |
| BMPRI1B   | -2.218 | 0.0237 | 229975_at   | bone morphogenetic protein receptor, type 1B                                                           |
| GLRB      | -2.035 | 0.0237 | 205280_at   | glycine receptor, beta                                                                                 |
| ABCB1     | -1.914 | 0.0237 | 209993_at   | ATP-binding cassette, sub-family B (MDR/TAP), member 1                                                 |
| MLLT3     | -0.875 | 0.0237 | 204917_s_at | myeloid/lymphoid or mixed-lineage leukemia (trithorax homolog, Drosophila); translocated to, 3         |
| RINT1     | 0.575  | 0.0237 | 218598_at   | RAD50 interactor 1                                                                                     |
| RASD1     | -2.957 | 0.0237 | 223467_at   | RAS, dexamethasone-induced 1                                                                           |
| RBBP7     | 0.469  | 0.0237 | 201092_at   | retinoblastoma binding protein 7                                                                       |
| ZNF322P1  | 0.866  | 0.0237 | 219376_at   | zinc finger protein 322 /// zinc finger protein 322 pseudogene 1                                       |
| C14orf28  | -0.86  | 0.0238 | 238647_at   | chromosome 14 open reading frame 28                                                                    |
| SP1       | 0.487  | 0.0238 | 224754_at   | Sp1 transcription factor                                                                               |
| ZNF675    | 0.585  | 0.0238 | 217547_x_at | zinc finger protein 675                                                                                |
| MCOLN3    | -3.082 | 0.0238 | 229797_at   | mucopolip 3                                                                                            |
| GALNTL2   | -3.142 | 0.0239 | 239461_at   | UDP-N-acetyl-alpha-D-galactosamine:polypeptide N-acetylgalactosaminyltransferase-like 2                |
| NAMPT     | -2.774 | 0.0239 | 243296_at   | Nicotinamide phosphoribosyltransferase                                                                 |
| HSPG2     | -1.497 | 0.0239 | 201655_s_at | heparan sulfate proteoglycan 2                                                                         |
| TMEM101   | 0.553  | 0.0239 | 225004_at   | transmembrane protein 101                                                                              |
| RB1       | 0.644  | 0.0239 | 203132_at   | retinoblastoma 1                                                                                       |
| HNRNPA3P1 | 0.662  | 0.0239 | 211931_s_at | heterogeneous nuclear ribonucleoprotein A3 /// heterogeneous nuclear ribonucleoprotein A3 pseudogene 1 |
| ANKIB1    | 0.606  | 0.0239 | 224687_at   | ankyrin repeat and IBR domain containing 1                                                             |
| AOC3      | -2.933 | 0.0239 | 204894_s_at | amine oxidase, copper containing 3 (vascular adhesion protein 1)                                       |
| TIE1      | -2.226 | 0.0239 | 204468_s_at | tyrosine kinase with immunoglobulin-like and EGF-like domains 1                                        |
| PSMA4     | 0.555  | 0.024  | 203396_at   | proteasome (prosome, macropain) subunit, alpha type, 4                                                 |
| SMG5      | 0.614  | 0.024  | 34868_at    | smg-5 homolog, nonsense mediated mRNA decay factor (C. elegans)                                        |
| EZH2      | 1.869  | 0.024  | 203358_s_at | enhancer of zeste homolog 2 (Drosophila)                                                               |
| SPRY4     | -1.51  | 0.024  | 221489_s_at | sprouty homolog 4 (Drosophila)                                                                         |
| PSMD4     | 0.554  | 0.0241 | 200882_s_at | proteasome (prosome, macropain) 26S subunit, non-ATPase, 4                                             |
| LSAMP     | -2.827 | 0.0241 | 235494_at   | limbic system-associated membrane protein                                                              |
| SLC35E1   | 0.557  | 0.0241 | 79005_at    | solute carrier family 35, member E1                                                                    |

|           |        |        |             |                                                                                     |
|-----------|--------|--------|-------------|-------------------------------------------------------------------------------------|
| PRDX1     | 0.731  | 0.0242 | 208680_at   | peroxiredoxin 1                                                                     |
| SLC19A2   | -1.845 | 0.0242 | 209681_at   | solute carrier family 19 (thiamine transporter), member 2                           |
| ISG20L2   | 0.582  | 0.0243 | 212766_s_at | interferon stimulated exonuclease gene 20kDa-like 2                                 |
| PON3      | -2.842 | 0.0243 | 213695_at   | paraoxonase 3                                                                       |
| SDF2      | 0.815  | 0.0244 | 203090_at   | stromal cell-derived factor 2                                                       |
| LYRM4     | 0.652  | 0.0245 | 218561_s_at | LYR motif containing 4                                                              |
| BUB3      | 0.866  | 0.0245 | 201457_x_at | budding uninhibited by benzimidazoles 3 homolog (yeast)                             |
| IKZF2     | -1.122 | 0.0245 | 231929_at   | IKAROS family zinc finger 2 (Helios)                                                |
| CTDSP2    | -0.357 | 0.0245 | 203445_s_at | CTD (carboxy-terminal domain, RNA polymerase II, polypeptide A) small phosphatase 2 |
| RNASEH2A  | 2.027  | 0.0245 | 203022_at   | ribonuclease H2, subunit A                                                          |
| RAPGEF3   | -1.438 | 0.0246 | 210051_at   | Rap guanine nucleotide exchange factor (GEF) 3                                      |
| TSPAN12   | -2.352 | 0.0247 | 219274_at   | tetraspanin 12                                                                      |
| PSMD14    | 1.019  | 0.0247 | 212296_at   | proteasome (prosome, macropain) 26S subunit, non-ATPase, 14                         |
| SMC4      | 1.251  | 0.0247 | 201664_at   | structural maintenance of chromosomes 4                                             |
| ZC3H15    | 0.507  | 0.0249 | 201593_s_at | zinc finger CCH-type containing 15                                                  |
| POCD6     | 0.977  | 0.0249 | 222380_s_at | Programmed cell death 6                                                             |
| DNA2      | 1.391  | 0.0249 | 213647_at   | DNA replication helicase 2 homolog (yeast)                                          |
| UBE2T     | 2.016  | 0.025  | 223229_at   | ubiquitin-conjugating enzyme E2T (putative)                                         |
| NR4A2     | -3.823 | 0.025  | 204621_s_at | nuclear receptor subfamily 4, group A, member 2                                     |
| PELO      | -2.257 | 0.025  | 1560359_at  | Pelota homolog (Drosophila)                                                         |
| CAD       | 1.018  | 0.0251 | 202715_at   | carbamoyl-phosphate synthetase 2, aspartate transcarbamylase, and dihydroorotase    |
| DNM3      | -1.617 | 0.0252 | 209839_at   | dynamitin 3                                                                         |
| PRPS1     | 0.965  | 0.0252 | 208447_s_at | phosphoribosyl pyrophosphate synthetase 1                                           |
| RHOBTB1   | -1.169 | 0.0253 | 212651_at   | Rho-related BTB domain containing 1                                                 |
| HVCN1     | -1.071 | 0.0253 | 226879_at   | hydrogen voltage-gated channel 1                                                    |
| MAPK3     | -0.822 | 0.0253 | 212046_x_at | mitogen-activated protein kinase 3                                                  |
| ANXA2P2   | 0.633  | 0.0253 | 208816_x_at | annexin A2 pseudogene 2                                                             |
| SNX17     | 0.711  | 0.0253 | 200991_s_at | sorting nexin 17                                                                    |
| TUBGCP4   | 0.95   | 0.0253 | 211337_s_at | tubulin, gamma complex associated protein 4                                         |
| FSTL3     | 1.879  | 0.0253 | 203592_s_at | folliculin-like 3 (secreted glycoprotein)                                           |
| LMCD1     | -1.977 | 0.0253 | 218574_s_at | LIM and cysteine-rich domains 1                                                     |
| CDC20     | 2.985  | 0.0253 | 202870_s_at | cell division cycle 20 homolog (S. cerevisiae)                                      |
| TTC21A    | -0.509 | 0.0254 | 230997_at   | tetratricopeptide repeat domain 21A                                                 |
| TGM2      | -2.707 | 0.0254 | 201042_at   | transglutaminase 2 (C polypeptide, protein-glutamine-gamma-glutamyltransferase)     |
| FLJ11710  | 0.717  | 0.0254 | 220529_at   | uncharacterized protein FLJ11710                                                    |
| ATXN1L    | -0.564 | 0.0254 | 227373_at   | ataxin 1-like                                                                       |
| RBM12B    | 0.915  | 0.0255 | 51228_at    | RNA binding motif protein 12B                                                       |
| MXD1      | -1.047 | 0.0255 | 226275_at   | MAX dimerization protein 1                                                          |
| CEP68     | -1.321 | 0.0255 | 212675_s_at | centrosomal protein 68kDa                                                           |
| TCF3      | 0.645  | 0.0255 | 210776_x_at | transcription factor 3 (E2A immunoglobulin enhancer binding factors E12/E47)        |
| USP32     | 0.87   | 0.0255 | 211702_s_at | ubiquitin specific peptidase 32                                                     |
| TLL12     | 0.904  | 0.0255 | 216251_s_at | tubulin tyrosine ligase-like family, member 12                                      |
| MRPS14    | 0.965  | 0.0255 | 203800_s_at | mitochondrial ribosomal protein S14                                                 |
| NAA15     | 1.034  | 0.0255 | 222837_s_at | N(alpha)-acetyltransferase 15, NatA auxiliary subunit                               |
| PSME3     | 1.042  | 0.0255 | 200987_x_at | proteasome (prosome, macropain) activator subunit 3 (PA28 gamma; Ki)                |
| PPP2R2C   | 1.214  | 0.0255 | 223574_x_at | protein phosphatase 2, regulatory subunit B, gamma                                  |
| ADCK2     | 1.471  | 0.0255 | 221893_s_at | aarF domain containing kinase 2                                                     |
| NIN2      | -1.923 | 0.0255 | 219594_at   | ninjurin 2                                                                          |
| GALT      | -1.186 | 0.0255 | 203179_at   | galactose-1-phosphate uridylyltransferase                                           |
| LOC254057 | -2.415 | 0.0255 | 232370_at   | uncharacterized LOC254057                                                           |
| GSTM5     | -2.09  | 0.0256 | 205752_s_at | glutathione S-transferase mu 5                                                      |
| LMO4      | -1.696 | 0.0256 | 229537_at   | LIM domain only 4                                                                   |
| TET3      | 0.367  | 0.0256 | 214754_at   | tet methylcytosine dioxygenase 3                                                    |
| RPL8      | 0.852  | 0.0257 | 200936_at   | ribosomal protein L8                                                                |
| GPR37     | 3.061  | 0.0257 | 209631_s_at | G protein-coupled receptor 37 (endothelin receptor type B-like)                     |
| GPR56     | -1.731 | 0.0257 | 212070_at   | G protein-coupled receptor 56                                                       |
| HNRNPL    | -0.63  | 0.0257 | 221860_at   | heterogeneous nuclear ribonucleoprotein L                                           |
| NMT2      | -1.28  | 0.0258 | 205006_s_at | N-myristoyltransferase 2                                                            |
| ELL3      | 1.871  | 0.0258 | 219518_s_at | elongation factor RNA polymerase II-like 3                                          |
| PAPS51    | 0.763  | 0.0259 | 209043_at   | 3'-phosphoadenosine 5'-phosphosulfate synthase 1                                    |
| BRCA2     | 1.303  | 0.0259 | 208368_s_at | breast cancer 2, early onset                                                        |
| CBX5      | 1.549  | 0.0259 | 226085_at   | chromobox homolog 5                                                                 |
| CDS2      | -0.633 | 0.0259 | 228456_s_at | CDP-diacylglycerol synthase (phosphatidate cytidyltransferase) 2                    |
| DBD1      | 0.418  | 0.0259 | 208619_at   | damage-specific DNA binding protein 1, 127kDa                                       |
| KDM1A     | 0.629  | 0.0259 | 212348_s_at | lysine (K)-specific demethylase 1A                                                  |
| SLC40A1   | -1.231 | 0.026  | 223044_at   | solute carrier family 40 (iron-regulated transporter), member 1                     |
| MRPS34    | 1.104  | 0.026  | 218112_at   | mitochondrial ribosomal protein S34                                                 |
| VTN       | 3.557  | 0.026  | 204534_at   | vitronectin                                                                         |
| GOLT1B    | 0.681  | 0.0261 | 222552_at   | golgi transport 1B                                                                  |
| MBIP      | -1.652 | 0.0261 | 218411_s_at | MAP3K12 binding inhibitory protein 1                                                |
| HIF1AN    | 0.42   | 0.0262 | 59999_at    | hypoxia inducible factor 1, alpha subunit inhibitor                                 |
| NEGR1     | -2.995 | 0.0262 | 229461_x_at | neuronal growth regulator 1                                                         |
| AP4E1     | 0.697  | 0.0262 | 228164_at   | adaptor-related protein complex 4, epsilon 1 subunit                                |
| C1orf31   | 0.778  | 0.0262 | 225638_at   | chromosome 1 open reading frame 31                                                  |
| TIMM17B   | 1.099  | 0.0262 | 203342_at   | translocase of inner mitochondrial membrane 17 homolog B (yeast)                    |

|             |        |        |              |                                                                                                                                      |
|-------------|--------|--------|--------------|--------------------------------------------------------------------------------------------------------------------------------------|
| AJUBA       | 1.106  | 0.0262 | 1553764_a_at | ajuba LIM protein                                                                                                                    |
| ORAOV1      | 1.333  | 0.0262 | 243531_at    | oral cancer overexpressed 1                                                                                                          |
| ALS2        | -0.876 | 0.0262 | 232184_at    | amyotrophic lateral sclerosis 2 (juvenile)                                                                                           |
| PTPRM       | -1.676 | 0.0263 | 1555579_s_at | protein tyrosine phosphatase, receptor type, M                                                                                       |
| LOC10050715 | 1.16   | 0.0263 | 240908_at    | uncharacterized LOC100507153                                                                                                         |
| TET2        | -0.685 | 0.0263 | 227624_at    | tet methylcytosine dioxygenase 2                                                                                                     |
| FOXN3       | -0.875 | 0.0264 | 205022_s_at  | forkhead box N3                                                                                                                      |
| USP14       | 0.459  | 0.0264 | 226567_at    | ubiquitin specific peptidase 14 (tRNA-guanine transglycosylase)                                                                      |
| LRRN3       | -2.529 | 0.0264 | 209841_s_at  | leucine rich repeat neuronal 3                                                                                                       |
| APCDD1      | -1.845 | 0.0265 | 225016_at    | adenomatosis polyposis coli down-regulated 1                                                                                         |
| PLEKHA5     | -1.264 | 0.0265 | 220952_s_at  | pleckstrin homology domain containing, family A member 5                                                                             |
| VDAC2       | 1.022  | 0.0265 | 211662_s_at  | voltage-dependent anion channel 2                                                                                                    |
| LOC730102   | -1.338 | 0.0265 | 241607_at    | quinone oxidoreductase-like protein 2 pseudogene                                                                                     |
| NAB1        | 0.73   | 0.0266 | 209272_at    | NGFI-A binding protein 1 (EGR1 binding protein 1)                                                                                    |
| C11orf84    | 0.202  | 0.0266 | 227292_at    | chromosome 11 open reading frame 84                                                                                                  |
| SVAP1       | 1.057  | 0.0266 | 225154_at    | synapse associated protein 1                                                                                                         |
| SETBP1      | -1.439 | 0.0266 | 205933_at    | SET binding protein 1                                                                                                                |
| YWHAZ       | 0.534  | 0.0266 | 200639_s_at  | tyrosine 3-monooxygenase/tryptophan 5-monooxygenase activation protein, zeta polypeptide                                             |
| FTSJ2       | 0.703  | 0.0266 | 222130_s_at  | FtsJ RNA methyltransferase homolog 2 (E. coli)                                                                                       |
| FGF18       | 1.75   | 0.0266 | 211485_s_at  | fibroblast growth factor 18                                                                                                          |
| VRK2        | 0.695  | 0.0267 | 205126_at    | vaccinia related kinase 2                                                                                                            |
| CENPO       | 1.389  | 0.0267 | 226118_at    | centromere protein O                                                                                                                 |
| RPL13P5     | -0.498 | 0.0268 | 210822_at    | ribosomal protein L13 pseudogene 5                                                                                                   |
| LOC10009363 | 0.435  | 0.0269 | 201065_s_at  | general transcription factor III // general transcription factor III, pseudogene 1 // general transcription factor II, i, pseudogene |
| IRAK1       | 0.958  | 0.0269 | 201587_s_at  | interleukin-1 receptor-associated kinase 1                                                                                           |
| TPSAB1      | -2.247 | 0.0269 | 205683_x_at  | tryptase alpha/beta 1                                                                                                                |
| SKP2        | 1.729  | 0.0269 | 203625_x_at  | S-phase kinase-associated protein 2, E3 ubiquitin protein ligase                                                                     |
| LOC10013493 | -0.926 | 0.0269 | 229685_at    | uncharacterized LOC100134937                                                                                                         |
| PRKX        | 1.426  | 0.0269 | 204061_at    | protein kinase, X-linked                                                                                                             |
| ACPI        | 1.208  | 0.027  | 215227_x_at  | acid phosphatase 1, soluble                                                                                                          |
| RDBP        | 0.585  | 0.0271 | 209219_at    | microRNA 1236 // RD RNA binding protein                                                                                              |
| CLDN5       | -2.208 | 0.0274 | 204482_at    | claudin 5                                                                                                                            |
| AGBL2       | 1.596  | 0.0275 | 220390_at    | ATP/GTP binding protein-like 2                                                                                                       |
| PTBP1       | 0.472  | 0.0275 | 212016_s_at  | polypyrimidine tract binding protein 1                                                                                               |
| MS4A2       | -1.845 | 0.0275 | 207496_at    | membrane-spanning 4-domains, subfamily A, member 2                                                                                   |
| HVI         | 1.42   | 0.0275 | 223622_s_at  | hydroxypruvate isomerase (putative)                                                                                                  |
| TMOD2       | -1.236 | 0.0276 | 226186_at    | tropomodulin 2 (neuronal)                                                                                                            |
| ERGIC2      | 0.524  | 0.0276 | 218135_at    | ERGIC and golgi 2                                                                                                                    |
| RABGAP1L    | -0.937 | 0.0276 | 213982_s_at  | RAB GTPase activating protein 1-like                                                                                                 |
| MCM7        | 0.888  | 0.0277 | 208795_s_at  | minichromosome maintenance complex component 7                                                                                       |
| SNRPD1      | 0.812  | 0.0277 | 202690_s_at  | small nuclear ribonucleoprotein D1 polypeptide 16kDa                                                                                 |
| EMC7        | 0.682  | 0.0278 | 217898_at    | ER membrane protein complex subunit 7                                                                                                |
| SETD7       | -1.172 | 0.0278 | 224928_at    | SET domain containing (lysine methyltransferase) 7                                                                                   |
| EARS2       | 0.612  | 0.0278 | 227374_at    | glutamyl-tRNA synthetase 2, mitochondrial (putative)                                                                                 |
| PRMT2       | 0.675  | 0.0278 | 228725_x_at  | protein arginine methyltransferase 2                                                                                                 |
| SCARA3      | 1.837  | 0.0278 | 219416_at    | scavenger receptor class A, member 3                                                                                                 |
| GPR143      | 2.921  | 0.0278 | 206696_at    | G protein-coupled receptor 143                                                                                                       |
| CENPA       | 3.001  | 0.0278 | 204962_s_at  | chromosome 2 open reading frame 18 // centromere protein A                                                                           |
| ID3         | -1.785 | 0.0279 | 207826_s_at  | inhibitor of DNA binding 3, dominant negative helix-loop-helix protein                                                               |
| KIF13B      | -0.699 | 0.0279 | 202962_at    | kinesin family member 13B                                                                                                            |
| AKAP8L      | 0.143  | 0.0279 | 215741_x_at  | A kinase (PRKA) anchor protein 8-like                                                                                                |
| SH2B3       | -1.239 | 0.028  | 203320_at    | SH2B adaptor protein 3                                                                                                               |
| SLC8A1      | -1.217 | 0.0281 | 235518_at    | solute carrier family 8 (sodium/calcium exchanger), member 1                                                                         |
| EIF1        | -0.963 | 0.0281 | 228967_at    | eukaryotic translation initiation factor 1                                                                                           |
| LOC10065333 | 0.517  | 0.0281 | 226976_at    | karyopherin alpha 6 (importin alpha 7) // uncharacterized LOC100652828 // uncharacterized LOC100653335                               |
| ZMYND8      | 1.091  | 0.0281 | 230533_at    | zinc finger, MYND-type containing 8                                                                                                  |
| C1orf21     | -0.877 | 0.0281 | 221272_s_at  | chromosome 1 open reading frame 21                                                                                                   |
| SESN3       | -0.891 | 0.0281 | 225123_at    | sestrin 3                                                                                                                            |
| FAM92A1     | -0.512 | 0.0281 | 228011_at    | family with sequence similarity 92, member A1                                                                                        |
| ZNF254      | 0.517  | 0.0283 | 242602_x_at  | zinc finger protein 254                                                                                                              |
| API5        | 0.903  | 0.0284 | 214959_s_at  | apoptosis inhibitor 5                                                                                                                |
| TMEM208     | 1.123  | 0.0284 | 221597_s_at  | transmembrane protein 208                                                                                                            |
| LSM10       | 0.441  | 0.0285 | 225593_at    | LSM10, U7 small nuclear RNA associated                                                                                               |
| GPHN        | -1.792 | 0.0285 | 223319_at    | gephyrin                                                                                                                             |
| RAP1GAP2    | 1.553  | 0.0285 | 213280_at    | RAP1 GTPase activating protein 2                                                                                                     |
| DCUN1D1     | 0.43   | 0.0285 | 218583_s_at  | DCN1, defective in cullin neddylation 1, domain containing 1 (S. cerevisiae)                                                         |
| POLDIP2     | 1.074  | 0.0285 | 222425_s_at  | polymerase (DNA-directed), delta interacting protein 2                                                                               |
| ELOF1       | 1.105  | 0.0288 | 225156_at    | elongation factor 1 homolog (S. cerevisiae)                                                                                          |
| CSNK1A1     | 0.327  | 0.0288 | 208867_s_at  | casein kinase 1, alpha 1                                                                                                             |
| CARD10      | -1.589 | 0.0288 | 210026_s_at  | caspase recruitment domain family, member 10                                                                                         |
| BCL6B       | -2.035 | 0.0289 | 228311_at    | B-cell CLL/lymphoma 6, member B                                                                                                      |
| RASSF9      | -1.791 | 0.0289 | 210335_at    | Ras association (RalGDS/AF-6) domain family (N-terminal) member 9                                                                    |
| GNL2        | 0.678  | 0.0289 | 201948_at    | guanine nucleotide binding protein-like 2 (nucleolar)                                                                                |
| ZBTB41      | 0.813  | 0.029  | 226962_at    | zinc finger and BTB domain containing 41                                                                                             |
| PPP2R5E     | 0.455  | 0.029  | 203338_at    | protein phosphatase 2, regulatory subunit B', epsilon isoform                                                                        |



|             |        |        |              |                                                                                                                                                                                              |
|-------------|--------|--------|--------------|----------------------------------------------------------------------------------------------------------------------------------------------------------------------------------------------|
| CDADC1      | -0.725 | 0.0291 | 221015_s_at  | cytidine and dCMP deaminase domain containing 1                                                                                                                                              |
| NARG2       | 0.611  | 0.0291 | 235189_at    | NMDA receptor regulated 2                                                                                                                                                                    |
| ERP29       | 0.674  | 0.0291 | 201216_at    | endoplasmic reticulum protein 29                                                                                                                                                             |
| LOC730268   | 0.722  | 0.0291 | 231973_s_at  | anaphase promoting complex subunit 1 /// anaphase-promoting complex subunit 1-like /// anaphase promoting complex subunit 1 pseudogene /// anaphase-promoting complex subunit 1-like         |
| C1orf226    | 0.986  | 0.0291 | 227019_at    | chromosome 1 open reading frame 226                                                                                                                                                          |
| SLC18A2     | -2.48  | 0.0291 | 205857_at    | solute carrier family 18 (vesicular monoamine), member 2                                                                                                                                     |
| PCDH18      | -1.671 | 0.0291 | 225975_at    | protocadherin 18                                                                                                                                                                             |
| VAV2        | 0.613  | 0.0291 | 226063_at    | vav 2 guanine nucleotide exchange factor                                                                                                                                                     |
| SLC35B2     | 0.91   | 0.0291 | 224716_at    | microRNA 4647 /// solute carrier family 35, member B2                                                                                                                                        |
| C7orf63     | -0.728 | 0.0291 | 1554919_s_at | chromosome 7 open reading frame 63                                                                                                                                                           |
| LPFR4       | -2.446 | 0.0292 | 213496_at    | lipid phosphate phosphatase-related protein type 4                                                                                                                                           |
| MTAP        | -1.187 | 0.0292 | 204956_at    | methylthioadenosine phosphorylase                                                                                                                                                            |
| MFF         | 0.491  | 0.0292 | 219137_s_at  | mitochondrial fission factor                                                                                                                                                                 |
| PTER        | 1.054  | 0.0292 | 218967_s_at  | phosphotriesterase related                                                                                                                                                                   |
| LOC339524   | -2.778 | 0.0292 | 215039_at    | heparan sulfate 2-O-sulfotransferase 1 /// uncharacterized LOC339524                                                                                                                         |
| CNKSR3      | -1.579 | 0.0292 | 227481_at    | CNKSR family member 3                                                                                                                                                                        |
| UBAC2       | 0.956  | 0.0292 | 224298_s_at  | UBA domain containing 2                                                                                                                                                                      |
| GIMAP6      | -2.016 | 0.0293 | 229367_s_at  | GTPase, IMAP family member 6                                                                                                                                                                 |
| C12orf23    | 0.602  | 0.0293 | 224759_s_at  | chromosome 12 open reading frame 23                                                                                                                                                          |
| LRRCS59     | 1.22   | 0.0293 | 222231_s_at  | leucine rich repeat containing 59                                                                                                                                                            |
| RBPI        | -0.698 | 0.0293 | 207785_s_at  | recombination signal binding protein for immunoglobulin kappa J region                                                                                                                       |
| ZFAND2B     | -0.41  | 0.0293 | 226168_at    | zinc finger, AN1-type domain 2B                                                                                                                                                              |
| MRRF        | 0.567  | 0.0293 | 225126_at    | mitochondrial ribosome recycling factor                                                                                                                                                      |
| SNF8        | 0.908  | 0.0293 | 218391_at    | SNF8, ESCRT-II complex subunit, homolog (S. cerevisiae)                                                                                                                                      |
| DTX4        | 1.281  | 0.0293 | 212611_at    | deltex homolog 4 (Drosophila)                                                                                                                                                                |
| HMMR        | 2.811  | 0.0293 | 209709_s_at  | hyaluronan-mediated motility receptor (RHAMM)                                                                                                                                                |
| KRT5        | 3.423  | 0.0293 | 201820_at    | keratin 5                                                                                                                                                                                    |
| RAP1A       | -0.588 | 0.0294 | 202362_at    | RAP1A, member of RAS oncogene family                                                                                                                                                         |
| RPN2        | 0.807  | 0.0294 | 208689_s_at  | ribophorin II                                                                                                                                                                                |
| ATP6V0E1    | 0.781  | 0.0294 | 200096_s_at  | ATPase, H+ transporting, lysosomal 9kDa, V0 subunit e1                                                                                                                                       |
| SLC35E3     | 0.491  | 0.0294 | 218988_at    | solute carrier family 35, member E3                                                                                                                                                          |
| PDZRN4      | -2.775 | 0.0295 | 220595_at    | PDZ domain containing ring finger 4                                                                                                                                                          |
| ITGA1       | -1.883 | 0.0295 | 226731_at    | integrin, alpha 1                                                                                                                                                                            |
| NSUN3       | 0.678  | 0.0295 | 219458_s_at  | NOP2/Sun domain family, member 3                                                                                                                                                             |
| TRIM26      | 0.965  | 0.0295 | 202702_at    | tripartite motif containing 26                                                                                                                                                               |
| RNF5        | 1.031  | 0.0295 | 209111_at    | ring finger protein 5, E3 ubiquitin protein ligase                                                                                                                                           |
| TMEM55A     | -1.156 | 0.0295 | 226338_at    | transmembrane protein 55A                                                                                                                                                                    |
| TIPARP      | -1.378 | 0.0296 | 212665_at    | TCDD-inducible poly(ADP-ribose) polymerase                                                                                                                                                   |
| ANKRD50     | -0.98  | 0.0296 | 225731_at    | ankyrin repeat domain 50                                                                                                                                                                     |
| EPN2        | -0.905 | 0.0296 | 203464_s_at  | epsin 2                                                                                                                                                                                      |
| RNASEH1     | 1.003  | 0.0297 | 218497_s_at  | ribonuclease H1                                                                                                                                                                              |
| CAMKK1      | -0.873 | 0.0297 | 223460_at    | calcium/calmodulin-dependent protein kinase kinase 1, alpha                                                                                                                                  |
| C17orf85    | -0.756 | 0.0297 | 229342_at    | chromosome 17 open reading frame 85                                                                                                                                                          |
| TSSK2       | -0.581 | 0.0297 | 32032_at     | DiGeorge syndrome critical region gene 14 /// testis-specific serine kinase 2                                                                                                                |
| PTCD2       | 0.764  | 0.0298 | 219658_at    | pentatricopeptide repeat domain 2                                                                                                                                                            |
| FAR2        | -1.91  | 0.0298 | 220615_s_at  | fatty acyl CoA reductase 2                                                                                                                                                                   |
| ELK3        | -1.286 | 0.0298 | 221773_at    | ELK3, ETS-domain protein (SRF accessory protein 2)                                                                                                                                           |
| ANXA2P3     | 0.584  | 0.0298 | 211241_at    | annexin A2 pseudogene 3                                                                                                                                                                      |
| BUD31       | 0.762  | 0.0298 | 205690_s_at  | BUD31 homolog (S. cerevisiae)                                                                                                                                                                |
| PFDN2       | 0.772  | 0.0299 | 218336_at    | prefoldin subunit 2                                                                                                                                                                          |
| TEX261      | 0.649  | 0.0299 | 212084_at    | testis expressed 261                                                                                                                                                                         |
| MCTS1       | 0.824  | 0.0299 | 218163_at    | malignant T cell amplified sequence 1                                                                                                                                                        |
| PIK3R2      | 0.692  | 0.03   | 1568629_s_at | phosphoinositide-3-kinase, regulatory subunit 2 (beta)                                                                                                                                       |
| FBXO11      | 0.995  | 0.03   | 219208_at    | F-box protein 11                                                                                                                                                                             |
| NDC80       | 2.003  | 0.03   | 204162_at    | NDC80 kinetochore complex component homolog (S. cerevisiae)                                                                                                                                  |
| SLC3A2      | 0.734  | 0.0301 | 200924_s_at  | solute carrier family 3 (activators of dibasic and neutral amino acid transport), member 2                                                                                                   |
| MCFD2       | 0.704  | 0.0301 | 212245_at    | multiple coagulation factor deficiency 2                                                                                                                                                     |
| LOC10050945 | -3.249 | 0.0301 | 236203_at    | major histocompatibility complex, class II, DQ alpha 1 /// HLA class II histocompatibility antigen, DQ alpha 1 chain-like /// HLA class II histocompatibility antigen, DQ alpha 1 chain-like |
| PPID        | -1.609 | 0.0302 | 228469_at    | Peptidylprolyl isomerase D                                                                                                                                                                   |
| CRY2        | -1.209 | 0.0302 | 212695_at    | cryptochrome 2 (photolyase-like)                                                                                                                                                             |
| SSNA1       | 0.748  | 0.0302 | 210378_s_at  | Sjogren syndrome nuclear autoantigen 1                                                                                                                                                       |
| CCNY        | 0.91   | 0.0302 | 224652_at    | cyclin Y                                                                                                                                                                                     |
| C19orf42    | 0.948  | 0.0302 | 229650_s_at  | chromosome 19 open reading frame 42                                                                                                                                                          |
| TMEM167A    | 1.196  | 0.0302 | 226276_at    | transmembrane protein 167A                                                                                                                                                                   |
| IGFBP7      | -1.152 | 0.0302 | 201162_at    | insulin-like growth factor binding protein 7                                                                                                                                                 |
| USP8        | 0.481  | 0.0303 | 202745_at    | ubiquitin specific peptidase 8                                                                                                                                                               |
| MK167       | 1.308  | 0.0303 | 212023_s_at  | antigen identified by monoclonal antibody Ki-67                                                                                                                                              |
| SHCBP1      | 2.131  | 0.0303 | 219493_at    | SHC SH2-domain binding protein 1                                                                                                                                                             |
| EIF4ENIF1   | -0.738 | 0.0304 | 218626_at    | eukaryotic translation initiation factor 4E nuclear import factor 1                                                                                                                          |
| ADAMTS13    | 0.667  | 0.0304 | 223844_at    | ADAM metallopeptidase with thrombospondin type 1 motif, 13                                                                                                                                   |
| DTX2P1-UPK3 | 0.694  | 0.0304 | 210707_x_at  | DTX2P1-UPK3BP1-PMS2P11 readthrough (non-protein coding)                                                                                                                                      |
| ASCC1       | 0.7    | 0.0304 | 1554627_a    | activating signal cointegrator 1 complex subunit 1                                                                                                                                           |
| REXO2       | 1.147  | 0.0304 | 223989_s_at  | REX2, RNA exonuclease 2 homolog (S. cerevisiae)                                                                                                                                              |
| RP56KA2     | -1.786 | 0.0305 | 212912_at    | ribosomal protein S6 kinase, 90kDa, polypeptide 2                                                                                                                                            |
| FAM83H      | 1.976  | 0.0306 | 226129_at    | family with sequence similarity 83, member H                                                                                                                                                 |

|          |        |        |             |                                                                                                                     |
|----------|--------|--------|-------------|---------------------------------------------------------------------------------------------------------------------|
| ATXN7L3B | 0.477  | 0.0306 | 212114_at   | ataxin 7-like 3B                                                                                                    |
| KIAA1609 | 0.697  | 0.0307 | 65438_at    | KIAA1609                                                                                                            |
| TYW3     | 0.721  | 0.0307 | 227141_at   | tRNA-yW synthesizing protein 3 homolog (S. cerevisiae)                                                              |
| IDE      | 0.723  | 0.0308 | 203327_at   | insulin-degrading enzyme                                                                                            |
| CREB3    | 0.988  | 0.0308 | 209432_s_at | cAMP responsive element binding protein 3                                                                           |
| GSPT1    | 0.786  | 0.0308 | 201912_s_at | G1 to S phase transition 1                                                                                          |
| KPNB1    | 0.494  | 0.0308 | 208974_x_at | karyopherin (importin) beta 1                                                                                       |
| AKR7A2   | 0.95   | 0.0308 | 202139_at   | aldo-keto reductase family 7, member A2 (aflatoxin aldehyde reductase)                                              |
| DARS     | 0.415  | 0.0309 | 201623_s_at | aspartyl-tRNA synthetase                                                                                            |
| ZNF521   | -1.764 | 0.0309 | 226677_at   | zinc finger protein 521                                                                                             |
| B3GALNT1 | 0.786  | 0.0309 | 211812_s_at | beta-1,3-N-acetylgalactosaminyltransferase 1 (globoside blood group)                                                |
| ANAPC11  | 0.614  | 0.031  | 226414_s_at | anaphase promoting complex subunit 11                                                                               |
| RAB1F    | 0.644  | 0.0311 | 204477_at   | RAB interacting factor                                                                                              |
| ANGPTL2  | -1.216 | 0.0311 | 219514_at   | angiotensin-like 2                                                                                                  |
| TOP2A    | 3.133  | 0.0312 | 201291_s_at | topoisomerase (DNA) II alpha 170kDa                                                                                 |
| TRIM29   | 3.735  | 0.0312 | 202504_at   | tripartite motif containing 29                                                                                      |
| GSN      | -1.018 | 0.0312 | 200696_s_at | gelsolin                                                                                                            |
| TM2D1    | 0.808  | 0.0312 | 213882_at   | TM2 domain containing 1                                                                                             |
| SUV39H2  | 1.146  | 0.0312 | 1554572_a   | suppressor of variegation 3-9 homolog 2 (Drosophila)                                                                |
| YEATS4   | 0.884  | 0.0313 | 218911_at   | YEATS domain containing 4                                                                                           |
| SLC16A9  | 1.406  | 0.0314 | 227506_at   | solute carrier family 16, member 9 (monocarboxylic acid transporter 9)                                              |
| H2AFV    | 0.862  | 0.0314 | 202487_at   | H2A histone family, member V                                                                                        |
| TSEN15   | 0.903  | 0.0315 | 230257_s_at | tRNA splicing endonuclease 15 homolog (S. cerevisiae)                                                               |
| PIK3R3   | -2.03  | 0.0317 | 202743_at   | phosphoinositide-3-kinase, regulatory subunit 3 (gamma)                                                             |
| LONRF1   | -1.291 | 0.0317 | 215322_at   | LON peptidase N-terminal domain and ring finger 1                                                                   |
| MECP2    | -0.648 | 0.0317 | 241924_at   | methyl CpG binding protein 2 (Rett syndrome)                                                                        |
| ER12     | 0.655  | 0.0319 | 213365_at   | ER11 exoribonuclease family member 2                                                                                |
| Mar-06   | 1.019  | 0.0319 | 201737_s_at | membrane-associated ring finger (C3HC4) 6, E3 ubiquitin protein ligase                                              |
| MAN1A1   | -1.271 | 0.0319 | 221760_at   | mannosidase, alpha, class 1A, member 1                                                                              |
| POP7     | 0.926  | 0.0319 | 209482_at   | processing of precursor 7, ribonuclease P/MRP subunit (S. cerevisiae)                                               |
| MDM2     | 1.025  | 0.0319 | 229711_s_at | Mdm2, p53 E3 ubiquitin protein ligase homolog (mouse)                                                               |
| MAPKAP1  | 1.855  | 0.0319 | 229845_at   | mitogen-activated protein kinase associated protein 1                                                               |
| RM12     | 1.902  | 0.0319 | 226456_at   | RM12, RecQ mediated genome instability 2, homolog (S. cerevisiae)                                                   |
| FAM83A   | 3.617  | 0.0319 | 238460_at   | family with sequence similarity 83, member A                                                                        |
| ME3      | -1.576 | 0.0319 | 204663_at   | malic enzyme 3, NADP(+)-dependent, mitochondrial                                                                    |
| PARG     | 0.32   | 0.0319 | 205060_at   | poly (ADP-ribose) glycohydrolase                                                                                    |
| PTTG1IP  | 0.524  | 0.0319 | 200677_at   | pituitary tumor-transforming 1 interacting protein                                                                  |
| SET      | 0.687  | 0.0319 | 213047_x_at | SET nuclear oncogene                                                                                                |
| MYZAP    | -2.557 | 0.0321 | 228568_at   | GRINL1A complex locus 1 /// myocardial zonula adherens protein                                                      |
| CLEC1A   | -1.779 | 0.0322 | 219761_at   | C-type lectin domain family 1, member A                                                                             |
| TAL1     | -2.422 | 0.0323 | 206283_s_at | T-cell acute lymphocytic leukemia 1                                                                                 |
| TFDP1    | 0.618  | 0.0323 | 212330_at   | transcription factor Dp-1                                                                                           |
| BLZF1    | 0.657  | 0.0323 | 32088_at    | basic leucine zipper nuclear factor 1                                                                               |
| C8orf59  | 0.66   | 0.0323 | 1555243_x   | chromosome 8 open reading frame 59                                                                                  |
| HSP90B1  | 0.727  | 0.0323 | 216449_x_at | heat shock protein 90kDa beta (Grp94), member 1                                                                     |
| EXOSC4   | 0.919  | 0.0323 | 58696_at    | exosome component 4                                                                                                 |
| NUSAP1   | 2.662  | 0.0323 | 218039_at   | nucleolar and spindle associated protein 1                                                                          |
| PPIA     | 0.355  | 0.0325 | 211378_x_at | peptidyl-prolyl cis-trans isomerase A-like /// peptidylprolyl isomerase A (cyclophilin A)                           |
| SLC25A27 | -2.115 | 0.0325 | 1554161_at  | solute carrier family 25, member 27                                                                                 |
| ANK3     | -2.358 | 0.0325 | 206385_s_at | ankyrin 3, node of Ranvier (ankyrin G)                                                                              |
| LTA4H    | -1.418 | 0.0325 | 208771_s_at | leukotriene A4 hydrolase                                                                                            |
| JMY      | -0.793 | 0.0325 | 241985_at   | junction mediating and regulatory protein, p53 cofactor                                                             |
| IKZF4    | -0.734 | 0.0325 | 226759_at   | IKAROS family zinc finger 4 (Eos)                                                                                   |
| TUBB2B   | 0.602  | 0.0325 | 209372_x_at | tubulin, beta 2A class IIa /// tubulin, beta 2B class IIb                                                           |
| ARMC6    | 0.754  | 0.0325 | 221758_at   | armadillo repeat containing 6                                                                                       |
| MGLL     | -1.378 | 0.0326 | 225102_at   | monoglyceride lipase                                                                                                |
| SNRK     | -1.405 | 0.0326 | 207474_at   | SNF related kinase                                                                                                  |
| PARVA    | 1.368  | 0.0326 | 222454_s_at | parvin, alpha                                                                                                       |
| RPL37    | 0.323  | 0.0327 | 200092_s_at | ribosomal protein L37                                                                                               |
| TYW1B    | 0.762  | 0.0327 | 218347_at   | tRNA-yW synthesizing protein 1 homolog (S. cerevisiae) /// tRNA-yW synthesizing protein 1 homolog B (S. cerevisiae) |
| EDN1     | -1.969 | 0.0327 | 222802_at   | endothelin 1                                                                                                        |
| DNAJC19  | 1.003  | 0.0327 | 225358_at   | DnaJ (Hsp40) homolog, subfamily C, member 19                                                                        |
| TPI1     | 1.011  | 0.0327 | 200822_x_at | triosephosphate isomerase 1                                                                                         |
| CHEK1    | 3.046  | 0.0327 | 205394_at   | checkpoint kinase 1                                                                                                 |
| SLC25A45 | -0.957 | 0.0328 | 1563498_s   | solute carrier family 25, member 45                                                                                 |
| STARD8   | -0.945 | 0.0328 | 206868_at   | StAR-related lipid transfer (START) domain containing 8                                                             |
| GSR      | 1.106  | 0.0331 | 225609_at   | glutathione reductase                                                                                               |
| FIBP     | 0.744  | 0.0332 | 202041_s_at | fibroblast growth factor (acidic) intracellular binding protein                                                     |
| ACSF2    | -1.741 | 0.0332 | 218844_at   | acyl-CoA synthetase family member 2                                                                                 |
| CD93     | -1.688 | 0.0334 | 202878_s_at | CD93 molecule                                                                                                       |
| COX16    | 0.771  | 0.0334 | 223191_at   | COX16 cytochrome c oxidase assembly homolog (S. cerevisiae)                                                         |
| AGTR1    | -2.904 | 0.0335 | 205357_s_at | angiotensin II receptor, type 1                                                                                     |
| PKD4     | -2.322 | 0.0335 | 225207_at   | pyruvate dehydrogenase kinase, isozyme 4                                                                            |
| DLEU2L   | 0.89   | 0.0335 | 215629_s_at | deleted in lymphocytic leukemia 2 (non-protein coding) /// deleted in lymphocytic leukemia 2-like                   |
| TCEB2    | 1.178  | 0.0335 | 200085_s_at | transcription elongation factor B (SIII), polypeptide 2 (18kDa, elongin B)                                          |

|             |        |        |             |                                                                                         |
|-------------|--------|--------|-------------|-----------------------------------------------------------------------------------------|
| PSMB4       | 0.729  | 0.0335 | 202243_s_at | proteasome (prosome, macropain) subunit, beta type, 4                                   |
| NYFC        | 0.662  | 0.0335 | 238231_at   | Nuclear transcription factor Y, gamma                                                   |
| ALG1        | 0.274  | 0.0335 | 223355_at   | asparagine-linked glycosylation 1, beta-1,4-mannosyltransferase homolog (S. cerevisiae) |
| C12orf32    | 0.754  | 0.0336 | 225837_at   | chromosome 12 open reading frame 32                                                     |
| PCNA        | 0.827  | 0.0336 | 201202_at   | proliferating cell nuclear antigen                                                      |
| CHCHD4      | 1.107  | 0.0336 | 229595_at   | coiled-coil-helix-coiled-coil-helix domain containing 4                                 |
| IL27RA      | -1.884 | 0.0336 | 222062_at   | interleukin 27 receptor, alpha                                                          |
| GALNS       | 0.665  | 0.0336 | 206335_at   | galactosamine (N-acetyl)-6-sulfate sulfatase                                            |
| DDX43       | -1.5   | 0.0336 | 220004_at   | DEAD (Asp-Glu-Ala-Asp) box polypeptide 43                                               |
| TEAD4       | 1.091  | 0.0337 | 41037_at    | TEA domain family member 4                                                              |
| MRS2        | 0.929  | 0.0337 | 218538_s_at | MRS2 magnesium homeostasis factor homolog (S. cerevisiae)                               |
| MKRN1       | 0.693  | 0.0337 | 209845_at   | makorin ring finger protein 1                                                           |
| SRPR        | 0.785  | 0.0337 | 200918_s_at | signal recognition particle receptor (docking protein)                                  |
| TRIM37      | 0.857  | 0.0337 | 213009_s_at | tripartite motif containing 37                                                          |
| P4HB        | 1.412  | 0.0337 | 200656_s_at | prolyl 4-hydroxylase, beta polypeptide                                                  |
| NDUFA8      | 0.846  | 0.0338 | 218160_at   | NADH dehydrogenase (ubiquinone) 1 alpha subcomplex, 8, 19kDa                            |
| CDC23       | 1.28   | 0.0339 | 223651_x_at | cell division cycle 23 homolog (S. cerevisiae)                                          |
| RALBP1      | 0.348  | 0.034  | 202845_s_at | ralA binding protein 1                                                                  |
| NDUFA13     | 1.198  | 0.034  | 220864_s_at | NADH dehydrogenase (ubiquinone) 1 alpha subcomplex, 13                                  |
| TMEM30B     | -2.794 | 0.034  | 213285_at   | transmembrane protein 30B                                                               |
| ANTXR2      | -1.512 | 0.0342 | 228573_at   | anthrax toxin receptor 2                                                                |
| C12orf52    | 0.915  | 0.0343 | 221777_at   | chromosome 12 open reading frame 52                                                     |
| ENY2        | 0.798  | 0.0344 | 218482_at   | enhancer of yellow 2 homolog (Drosophila)                                               |
| SAR1A       | 1.367  | 0.0344 | 201543_s_at | SAR1 homolog A (S. cerevisiae)                                                          |
| DYNC1H1     | 0.596  | 0.0344 | 229115_at   | dynein, cytoplasmic 1, heavy chain 1                                                    |
| UBE2C       | 1.738  | 0.0344 | 202954_at   | ubiquitin-conjugating enzyme E2C                                                        |
| SURF6       | 0.621  | 0.0345 | 225038_s_at | surfeit 6                                                                               |
| LOC84856    | 3.056  | 0.0345 | 233562_at   | uncharacterized LOC84856                                                                |
| WISP2       | -1.715 | 0.0345 | 205792_at   | WNT1 inducible signaling pathway protein 2                                              |
| RAPGEF2     | -0.659 | 0.0345 | 203097_s_at | Rap guanine nucleotide exchange factor (GEF) 2                                          |
| ADAM17      | 0.62   | 0.0346 | 213532_at   | ADAM metallopeptidase domain 17                                                         |
| SIDT2       | -0.725 | 0.0346 | 56256_at    | SID1 transmembrane family, member 2                                                     |
| TMEM204     | -1.416 | 0.0346 | 219315_s_at | transmembrane protein 204                                                               |
| POP5        | 0.9    | 0.0347 | 204839_at   | processing of precursor 5, ribonuclease P/MRP subunit (S. cerevisiae)                   |
| NPRL3       | 0.598  | 0.0347 | 210672_s_at | nitrogen permease regulator-like 3 (S. cerevisiae)                                      |
| PGM3        | 1.029  | 0.0347 | 210041_s_at | phosphoglucomutase 3                                                                    |
| LRP8        | 2.188  | 0.0348 | 228955_at   | low density lipoprotein receptor-related protein 8, apolipoprotein e receptor           |
| LRRC8C      | -1.823 | 0.0348 | 228314_at   | leucine rich repeat containing 8 family, member C                                       |
| ECT2        | 1.569  | 0.0349 | 219787_s_at | epithelial cell transforming sequence 2 oncogene                                        |
| EFHA2       | -1.589 | 0.035  | 238458_at   | EF-hand domain family, member A2                                                        |
| NOL10       | 0.614  | 0.035  | 222684_s_at | nucleolar protein 10                                                                    |
| SELE        | -4.281 | 0.035  | 206211_at   | selectin E                                                                              |
| SURF2       | 0.217  | 0.035  | 205224_at   | surfeit 2                                                                               |
| HLF         | -2.931 | 0.035  | 204755_x_at | hepatic leukemia factor                                                                 |
| PUS7L       | 0.358  | 0.035  | 221025_x_at | pseudouridylate synthase 7 homolog (S. cerevisiae)-like                                 |
| LRPPRC      | 0.792  | 0.035  | 1557360_at  | leucine-rich pentatricopeptide repeat containing                                        |
| SNRPE       | 0.821  | 0.035  | 203316_s_at | small nuclear ribonucleoprotein polypeptide E                                           |
| HECTD2      | -1.208 | 0.035  | 227568_at   | HECT domain containing E3 ubiquitin protein ligase 2                                    |
| C21orf59    | 0.742  | 0.035  | 218123_at   | chromosome 21 open reading frame 59                                                     |
| GIMAP8      | -1.605 | 0.0351 | 235306_at   | GTPase, IMAP family member 8                                                            |
| GGCT        | 0.698  | 0.0351 | 215380_s_at | gamma-glutamylcyclotransferase                                                          |
| STX6        | 1.006  | 0.0351 | 212800_at   | syntaxin 6                                                                              |
| RGNEF       | -1.142 | 0.0351 | 219610_at   | 190 kDa guanine nucleotide exchange factor                                              |
| PZP         | -1.137 | 0.0352 | 207330_at   | pregnancy-zone protein                                                                  |
| WHSC2       | -0.212 | 0.0352 | 203112_s_at | microRNA 943 /// Wolf-Hirschhorn syndrome candidate 2                                   |
| PPIC        | 0.548  | 0.0352 | 204517_at   | peptidylprolyl isomerase C (cyclophilin C)                                              |
| MED10       | 1.034  | 0.0352 | 223247_at   | mediator complex subunit 10                                                             |
| DPT         | -2.771 | 0.0352 | 213071_at   | dermatopontin                                                                           |
| POLR1C      | 0.783  | 0.0353 | 209317_at   | polymerase (RNA) I polypeptide C, 30kDa                                                 |
| PDE4B       | -0.858 | 0.0353 | 203708_at   | phosphodiesterase 4B, cAMP-specific                                                     |
| AHSA1       | 0.532  | 0.0353 | 201491_at   | AHA1, activator of heat shock 90kDa protein ATPase homolog 1 (yeast)                    |
| YARS2       | 0.614  | 0.0353 | 218470_at   | tyrosyl-tRNA synthetase 2, mitochondrial                                                |
| CTSL2       | 1.657  | 0.0353 | 210074_at   | cathepsin L2                                                                            |
| WDR44       | 0.847  | 0.0354 | 219297_at   | WD repeat domain 44                                                                     |
| CERS6       | 0.974  | 0.0354 | 212442_s_at | ceramide synthase 6                                                                     |
| MBD5        | 0.918  | 0.0354 | 220195_at   | methyl-CpG binding domain protein 5                                                     |
| CKS1B       | 1.385  | 0.0354 | 201897_s_at | CDC28 protein kinase regulatory subunit 1B                                              |
| LOC10050673 | 0.857  | 0.0354 | 1562012_at  | uncharacterized LOC100506730                                                            |
| TIMM44      | 1.082  | 0.0355 | 203093_s_at | translocase of inner mitochondrial membrane 44 homolog (yeast)                          |
| VPS25       | 0.659  | 0.0355 | 224608_s_at | vacuolar protein sorting 25 homolog (S. cerevisiae)                                     |
| PDI2A       | 3.448  | 0.0356 | 206691_s_at | protein disulfide isomerase family A, member 2                                          |
| SHMT2       | 0.817  | 0.0356 | 214096_s_at | serine hydroxymethyltransferase 2 (mitochondrial)                                       |
| POLD3       | 0.578  | 0.0357 | 212836_at   | polymerase (DNA-directed), delta 3, accessory subunit                                   |
| WWC1        | 2.696  | 0.0357 | 216074_x_at | WW and C2 domain containing 1                                                           |
| BZRAP1-AS1  | -1.015 | 0.0358 | 228826_at   | BZRAP1 antisense RNA 1 (non-protein coding)                                             |

|             |        |        |              |                                                                                           |
|-------------|--------|--------|--------------|-------------------------------------------------------------------------------------------|
| PNPLA4      | 1.384  | 0.0358 | 209739_s_at  | patatin-like phospholipase domain containing 4                                            |
| TSTA3       | 1.421  | 0.0359 | 201644_at    | tissue specific transplantation antigen P35B                                              |
| KIT         | -2.278 | 0.036  | 205051_s_at  | v-kit Hardy-Zuckerman 4 feline sarcoma viral oncogene homolog                             |
| ING3        | -0.626 | 0.036  | 205070_at    | inhibitor of growth family, member 3                                                      |
| POLR2K      | 0.776  | 0.036  | 202635_s_at  | polymerase (RNA) II (DNA directed) polypeptide K, 7.0kDa                                  |
| UROS        | 1.1    | 0.036  | 203031_s_at  | uroporphyrinogen III synthase                                                             |
| PRR24       | -1.037 | 0.0361 | 227325_at    | proline rich 24                                                                           |
| POLA1       | 0.511  | 0.0362 | 204835_at    | polymerase (DNA directed), alpha 1, catalytic subunit                                     |
| BAD         | 0.394  | 0.0362 | 232660_at    | BCL2-associated agonist of cell death                                                     |
| NDUFB2      | 0.782  | 0.0362 | 218201_at    | NADH dehydrogenase (ubiquinone) 1 beta subcomplex, 2, 8kDa                                |
| SNRPF       | 0.866  | 0.0362 | 203832_at    | small nuclear ribonucleoprotein polypeptide F                                             |
| TPX2        | 2.346  | 0.0362 | 210052_s_at  | TPX2, microtubule-associated, homolog (Xenopus laevis)                                    |
| ATAD3A      | 0.434  | 0.0362 | 219068_x_at  | ATPase family, AAA domain containing 3A                                                   |
| TEAD2       | -1.579 | 0.0363 | 226408_at    | TEA domain family member 2                                                                |
| TMEM178A    | -1.522 | 0.0363 | 229302_at    | transmembrane protein 178A                                                                |
| PRKD1       | -1.409 | 0.0363 | 205880_at    | protein kinase D1                                                                         |
| PHC1        | -0.87  | 0.0363 | 225958_at    | polyhomeotic homolog 1 (Drosophila)                                                       |
| KCNQ10T1    | 0.963  | 0.0363 | 243428_at    | KCNQ1 opposite strand/antisense transcript 1 (non-protein coding)                         |
| AHS2A       | 1.784  | 0.0363 | 230148_at    | AHA1, activator of heat shock 90kDa protein ATPase homolog 2 (yeast)                      |
| SPATS2      | 1.016  | 0.0364 | 222593_s_at  | spermatogenesis associated, serine-rich 2                                                 |
| STARD13     | -1.167 | 0.0365 | 213103_at    | STAR-related lipid transfer (START) domain containing 13                                  |
| C12orf73    | 1.113  | 0.0365 | 226943_at    | chromosome 12 open reading frame 73                                                       |
| PRR13       | 0.487  | 0.0367 | 217794_at    | proline rich 13                                                                           |
| UBE2F       | 0.489  | 0.0367 | 225791_at    | ubiquitin-conjugating enzyme E2F (putative)                                               |
| PHF20L1     | 0.645  | 0.0367 | 1554472_a_at | PHD finger protein 20-like 1                                                              |
| TOM1L2      | -0.759 | 0.0368 | 226198_at    | target of myb1-like 2 (chicken)                                                           |
| HIST1H2BD   | 2.866  | 0.0368 | 209911_x_at  | histone cluster 1, H2bd                                                                   |
| DUT         | 0.857  | 0.0368 | 208955_at    | deoxyuridine triphosphatase                                                               |
| PLXDC1      | -1.904 | 0.037  | 214081_at    | plexin domain containing 1                                                                |
| PAIP1       | 1.159  | 0.037  | 208051_s_at  | poly(A) binding protein interacting protein 1                                             |
| PDZRN3      | -1.464 | 0.0371 | 212915_at    | PDZ domain containing ring finger 3                                                       |
| KARS        | 0.474  | 0.0371 | 200079_s_at  | lysyl-tRNA synthetase                                                                     |
| TMEM179B    | 0.587  | 0.0371 | 228089_x_at  | transmembrane protein 179B                                                                |
| GAK         | -0.593 | 0.0371 | 40225_at     | cyclin G associated kinase                                                                |
| ENG         | -1.56  | 0.0372 | 201809_s_at  | endoglin                                                                                  |
| DOCK8       | -0.962 | 0.0372 | 232843_s_at  | dedicator of cytokinesis 8                                                                |
| NUP107      | 0.631  | 0.0372 | 218768_at    | nucleoporin 107kDa                                                                        |
| FER         | 0.73   | 0.0372 | 206412_at    | fer (fps/fes related) tyrosine kinase                                                     |
| MIR3620     | 0.754  | 0.0372 | 208750_s_at  | ADP-ribosylation factor 1 /// microRNA 3620                                               |
| TGIF2-C20OR | 1.244  | 0.0372 | 224376_s_at  | chromosome 20 open reading frame 24 /// TGIF2-C20orf24 readthrough                        |
| SETD3       | -0.399 | 0.0372 | 212465_at    | SET domain containing 3                                                                   |
| ABI2        | 0.908  | 0.0372 | 211793_s_at  | abl-interactor 2                                                                          |
| XPO1        | 0.367  | 0.0372 | 208775_at    | exportin 1 (CRM1 homolog, yeast)                                                          |
| TBCA        | 0.643  | 0.0373 | 203667_at    | tubulin folding cofactor A                                                                |
| XPO5        | 0.815  | 0.0373 | 223056_s_at  | exportin 5                                                                                |
| FXYD5       | -1.515 | 0.0374 | 224252_s_at  | FXYD domain containing ion transport regulator 5                                          |
| CARD11      | 1.072  | 0.0374 | 223514_at    | caspase recruitment domain family, member 11                                              |
| C6orf62     | 1.364  | 0.0374 | 213875_x_at  | chromosome 6 open reading frame 62                                                        |
| RNF34       | 0.497  | 0.0375 | 219035_s_at  | ring finger protein 34, E3 ubiquitin protein ligase                                       |
| BOP1        | 1.594  | 0.0375 | 212563_at    | block of proliferation 1                                                                  |
| ETS2        | -1.25  | 0.0376 | 201328_at    | v-ets erythroblastosis virus E26 oncogene homolog 2 (avian)                               |
| AKR7A3      | 0.787  | 0.0376 | 216381_x_at  | aldo-keto reductase family 7, member A3 (aflatoxin aldehyde reductase)                    |
| LAMTOR2     | 0.623  | 0.0376 | 218291_at    | late endosomal/lysosomal adaptor, MAPK and MTOR activator 2                               |
| SSX2IP      | 0.502  | 0.0376 | 203015_s_at  | synovial sarcoma, X breakpoint 2 interacting protein                                      |
| LOC10013482 | -0.941 | 0.0377 | 231886_at    | uncharacterized LOC100134822                                                              |
| FLJ43489    | 0.849  | 0.0377 | 244551_at    | uncharacterized LOC644283                                                                 |
| PRDX5       | 1.16   | 0.0377 | 1560587_s_at | peroxiredoxin 5                                                                           |
| MYCL1       | 1.334  | 0.0377 | 214058_at    | v-myc myelocytomatosis viral oncogene homolog 1, lung carcinoma derived (avian)           |
| DHX9        | 0.564  | 0.0377 | 202420_s_at  | DEAH (Asp-Glu-Ala-His) box polypeptide 9                                                  |
| FMO2        | -3.309 | 0.0377 | 228268_at    | flavin containing monooxygenase 2 (non-functional)                                        |
| CISD2       | 0.931  | 0.0377 | 226686_at    | CDGSH iron sulfur domain 2                                                                |
| SMAD9       | -1.668 | 0.0377 | 227719_at    | SMAD family member 9                                                                      |
| CXorf69     | -1.159 | 0.0377 | 227976_at    | chromosome X open reading frame 69                                                        |
| MTM1        | -0.933 | 0.0377 | 36920_at     | myotubularin 1                                                                            |
| ZC3HC1      | 0.52   | 0.0377 | 223163_s_at  | zinc finger, C3HC-type containing 1                                                       |
| DCAF6       | 0.554  | 0.0377 | 232349_x_at  | DDB1 and CUL4 associated factor 6                                                         |
| IRS1        | -1.444 | 0.0377 | 204686_at    | insulin receptor substrate 1                                                              |
| KIF16B      | -0.695 | 0.0377 | 219570_at    | kinesin family member 16B                                                                 |
| MRPS21      | 0.414  | 0.038  | 222997_s_at  | mitochondrial ribosomal protein S21                                                       |
| ICAM2       | -1.52  | 0.038  | 213620_s_at  | intercellular adhesion molecule 2                                                         |
| NFATC4      | -1.353 | 0.0381 | 236270_at    | nuclear factor of activated T-cells, cytoplasmic, calcineurin-dependent 4                 |
| NMNAT3      | -0.884 | 0.0381 | 228090_at    | nicotinamide nucleotide adenyltransferase 3                                               |
| GABRB2      | -3.417 | 0.0382 | 242344_at    | gamma-aminobutyric acid (GABA) A receptor, beta 2                                         |
| ALG3        | 0.922  | 0.0382 | 207396_s_at  | asparagine-linked glycosylation 3, alpha-1,3- mannosyltransferase homolog (S. cerevisiae) |
| SMEK2       | 1.002  | 0.0382 | 222270_at    | SMEK homolog 2, suppressor of mek1 (Dictyostelium)                                        |

|             |        |        |             |                                                                                        |
|-------------|--------|--------|-------------|----------------------------------------------------------------------------------------|
| HELLS       | 1.603  | 0.0382 | 223556_at   | helicase, lymphoid-specific                                                            |
| OGFOD2      | 0.604  | 0.0382 | 219245_s_at | 2-oxoglutarate and iron-dependent oxygenase domain containing 2                        |
| PSMC3IP     | 0.337  | 0.0383 | 205956_x_at | PSMC3 interacting protein                                                              |
| DDX1        | 0.488  | 0.0383 | 201241_at   | DEAD (Asp-Glu-Ala-Asp) box helicase 1                                                  |
| SELP        | -2.264 | 0.0383 | 206049_at   | selectin P (granule membrane protein 140kDa, antigen CD62)                             |
| MELK        | 2.816  | 0.0383 | 204825_at   | maternal embryonic leucine zipper kinase                                               |
| CLIC2       | -1.701 | 0.0383 | 213415_at   | chloride intracellular channel 2                                                       |
| NRD1        | 0.593  | 0.0383 | 208709_s_at | nardilysin (N-arginine dibasic convertase)                                             |
| MOCOS       | 1.984  | 0.0384 | 219959_at   | molybdenum cofactor sulfurase                                                          |
| Csorf34     | 1.448  | 0.0384 | 229886_at   | chromosome 5 open reading frame 34                                                     |
| HSPA4       | 0.855  | 0.0384 | 211015_s_at | heat shock 70kDa protein 4                                                             |
| PODN        | -1.794 | 0.0386 | 226522_at   | podocan                                                                                |
| RHOJ        | -1.714 | 0.0386 | 238905_at   | ras homolog family member J                                                            |
| PLK1        | 0.207  | 0.0386 | 202240_at   | polo-like kinase 1                                                                     |
| EPRS        | 0.495  | 0.0386 | 200842_s_at | glutamyl-prolyl-tRNA synthetase                                                        |
| LUC7L2      | 0.573  | 0.0386 | 217842_at   | LUC7-like 2 (S. cerevisiae)                                                            |
| ZFYVE16     | 2.051  | 0.0387 | 1555982_at  | zinc finger, FYVE domain containing 16                                                 |
| MED20       | 0.592  | 0.0387 | 212872_s_at | mediator complex subunit 20                                                            |
| FLJ39739    | 1.038  | 0.0387 | 1556033_at  | uncharacterized FLJ39739                                                               |
| DDOST       | 1.132  | 0.0387 | 208675_s_at | dolichyl-diphosphooligosaccharide--protein glycosyltransferase                         |
| CUTA        | 0.831  | 0.0387 | 221488_s_at | cutA divalent cation tolerance homolog (E. coli)                                       |
| C10orf35    | 1.404  | 0.0388 | 226313_at   | chromosome 10 open reading frame 35                                                    |
| HPGDS       | -2.231 | 0.0388 | 206726_at   | hematopoietic prostaglandin D synthase                                                 |
| MPG         | 0.671  | 0.0388 | 203686_at   | N-methylpurine-DNA glycosylase                                                         |
| GGH         | 1.398  | 0.0389 | 203560_at   | gamma-glutamyl hydrolase (conjugase, folypolyglutamyl hydrolase)                       |
| C1orf144    | 0.628  | 0.0389 | 212004_at   | chromosome 1 open reading frame 144                                                    |
| SPC25       | 1.971  | 0.0391 | 209891_at   | SPC25, NDC80 kinetochore complex component, homolog (S. cerevisiae)                    |
| C8orf4      | -2.954 | 0.0391 | 218541_s_at | chromosome 8 open reading frame 4                                                      |
| CFL2        | -0.998 | 0.0392 | 224352_s_at | cofilin 2 (muscle)                                                                     |
| GCFC2       | 1.021  | 0.0392 | 210175_at   | GC-rich sequence DNA-binding factor 2                                                  |
| PARK7       | 0.521  | 0.0393 | 200006_at   | parkinson protein 7                                                                    |
| SPIRE2      | 0.359  | 0.0394 | 227706_at   | spire homolog 2 (Drosophila)                                                           |
| TMEM106C    | 1.195  | 0.0395 | 201764_at   | transmembrane protein 106C                                                             |
| FOXM1       | 1.618  | 0.0395 | 202580_x_at | forkhead box M1                                                                        |
| APTX        | 0.638  | 0.0397 | 218527_at   | apratxin                                                                               |
| ROBO4       | -2.127 | 0.0397 | 226028_at   | roundabout, axon guidance receptor, homolog 4 (Drosophila)                             |
| FAT4        | -1.535 | 0.0398 | 219427_at   | FAT tumor suppressor homolog 4 (Drosophila)                                            |
| CCBE1       | -2.441 | 0.0399 | 229641_at   | collagen and calcium binding EGF domains 1                                             |
| SPSB1       | -0.989 | 0.04   | 226075_at   | splA/ryanodine receptor domain and SOCS box containing 1                               |
| OSBPL8      | -0.582 | 0.04   | 212585_at   | oxysterol binding protein-like 8                                                       |
| BEND7       | -1.538 | 0.0401 | 227341_at   | BEN domain containing 7                                                                |
| NUCKS1      | 0.992  | 0.0401 | 222424_s_at | nuclear casein kinase and cyclin-dependent kinase substrate 1                          |
| SEC24A      | 0.49   | 0.0401 | 212900_at   | SEC24 family, member A (S. cerevisiae)                                                 |
| MMRN2       | -1.751 | 0.0401 | 236262_at   | multimerin 2                                                                           |
| ARL8B       | 0.321  | 0.0401 | 217852_s_at | ADP-ribosylation factor-like 8B                                                        |
| SETDB1      | 0.454  | 0.0402 | 214197_s_at | SET domain, bifurcated 1                                                               |
| SEMA6A      | -1.712 | 0.0403 | 223449_at   | sema domain, transmembrane domain (TM), and cytoplasmic domain, (semaphorin) 6A        |
| QKI         | -1.121 | 0.0403 | 236154_at   | QKI, KH domain containing, RNA binding                                                 |
| IMPAD1      | 0.722  | 0.0403 | 222654_at   | inositol monophosphatase domain containing 1                                           |
| CTSF        | -1.179 | 0.0403 | 203657_s_at | cathepsin F                                                                            |
| FBXO45      | 0.724  | 0.0403 | 225100_at   | F-box protein 45                                                                       |
| TSPAN7      | -2.751 | 0.0404 | 202242_at   | tetraspanin 7                                                                          |
| LARP4       | 0.454  | 0.0404 | 212714_at   | La ribonucleoprotein domain family, member 4                                           |
| MED8        | 0.754  | 0.0404 | 213126_at   | mediator complex subunit 8                                                             |
| FAM63B      | 1.26   | 0.0404 | 222111_at   | family with sequence similarity 63, member B                                           |
| SEMA3G      | -2.478 | 0.0404 | 219689_at   | sema domain, immunoglobulin domain (Ig), short basic domain, secreted, (semaphorin) 3G |
| PLCG2       | -0.921 | 0.0405 | 204613_at   | phospholipase C, gamma 2 (phosphatidylinositol-specific)                               |
| GBP2        | -1.539 | 0.0406 | 242907_at   | guanylate binding protein 2, interferon-inducible                                      |
| NCOA1       | -0.612 | 0.0406 | 209105_at   | nuclear receptor coactivator 1                                                         |
| GATAD1      | 0.713  | 0.0406 | 214718_at   | GATA zinc finger domain containing 1                                                   |
| SGCD        | -1.556 | 0.0406 | 213543_at   | sarcoglycan, delta (35kDa dystrophin-associated glycoprotein)                          |
| EIF3B       | 0.575  | 0.0407 | 211501_s_at | eukaryotic translation initiation factor 3, subunit B                                  |
| CHCHD2      | 0.955  | 0.0407 | 217720_at   | coiled-coil-helix-coiled-coil-helix domain containing 2                                |
| FAM108B1    | -0.36  | 0.0408 | 227551_at   | family with sequence similarity 108, member B1                                         |
| C11orf80    | 1.321  | 0.0408 | 238593_at   | chromosome 11 open reading frame 80                                                    |
| CH25H       | -2.304 | 0.0408 | 206932_at   | cholesterol 25-hydroxylase                                                             |
| ATP13A1     | 0.864  | 0.0408 | 218052_s_at | ATPase type 13A1                                                                       |
| TXNDC15     | 0.271  | 0.041  | 220495_s_at | thioredoxin domain containing 15                                                       |
| GLRX2       | 0.9    | 0.041  | 219933_at   | glutaredoxin 2                                                                         |
| ZNF826P     | 1.13   | 0.041  | 1569191_at  | zinc finger protein 826, pseudogene                                                    |
| MIEN1       | 0.784  | 0.0411 | 224447_s_at | migration and invasion enhancer 1                                                      |
| LOC10065297 | -1.39  | 0.0412 | 225602_at   | GLI pathogenesis-related 2 /// uncharacterized LOC100652973                            |
| BRD8        | 0.679  | 0.0412 | 242265_at   | Bromodomain containing 8                                                               |
| CDH19       | -2.057 | 0.0412 | 206898_at   | cadherin 19, type 2                                                                    |
| VPS37B      | -0.943 | 0.0412 | 221704_s_at | vacuolar protein sorting 37 homolog B (S. cerevisiae)                                  |

|            |        |        |              |                                                                                        |
|------------|--------|--------|--------------|----------------------------------------------------------------------------------------|
| OMA1       | 0.716  | 0.0412 | 226020_s_at  | disabled homolog 1 (Drosophila) /// OMA1 zinc metallopeptidase homolog (S. cerevisiae) |
| GSK3B      | 0.904  | 0.0412 | 209945_s_at  | glycogen synthase kinase 3 beta                                                        |
| MAD2L1     | 1.916  | 0.0412 | 203362_s_at  | MAD2 mitotic arrest deficient-like 1 (yeast)                                           |
| PPAP2B     | -1.144 | 0.0412 | 212230_at    | phosphatidic acid phosphatase type 2B                                                  |
| C19orf52   | 0.687  | 0.0412 | 231901_at    | chromosome 19 open reading frame 52                                                    |
| TIGD6      | 0.601  | 0.0413 | 220986_s_at  | tigger transposable element derived 6                                                  |
| HMBS       | 1.117  | 0.0414 | 203040_s_at  | hydroxymethylbilane synthase                                                           |
| FAM13A     | -1.615 | 0.0414 | 202973_x_at  | family with sequence similarity 13, member A                                           |
| MAP7D3     | -1.263 | 0.0414 | 219626_at    | MAP7 domain containing 3                                                               |
| PLCB4      | -2.492 | 0.0415 | 203895_at    | phospholipase C, beta 4                                                                |
| HLA-DOB    | -1.034 | 0.0415 | 205671_s_at  | major histocompatibility complex, class II, DO beta                                    |
| PARN       | 0.61   | 0.0416 | 203905_at    | poly(A)-specific ribonuclease                                                          |
| MZT2A      | 1.251  | 0.0416 | 213166_x_at  | microRNA 4784 /// mitotic spindle organizing protein 2A                                |
| ODC1       | 1.179  | 0.0417 | 200790_at    | ornithine decarboxylase 1                                                              |
| NFKBIA     | -1.021 | 0.0417 | 201502_s_at  | nuclear factor of kappa light polypeptide gene enhancer in B-cells inhibitor, alpha    |
| GMCL1      | 0.8    | 0.0417 | 239355_at    | germ cell-less homolog 1 (Drosophila)                                                  |
| RACGAP1    | 1.533  | 0.0417 | 222077_s_at  | Rac GTPase activating protein 1                                                        |
| FNDC3B     | 2.29   | 0.0417 | 229865_at    | fibronectin type III domain containing 3B                                              |
| MRPL27     | 0.774  | 0.0417 | 224330_s_at  | mitochondrial ribosomal protein L27                                                    |
| Csor15     | 0.447  | 0.0418 | 203024_s_at  | chromosome 5 open reading frame 15                                                     |
| TARDBP     | 0.366  | 0.0419 | 200020_at    | TAR DNA binding protein                                                                |
| SEPP1      | -0.829 | 0.0419 | 201427_s_at  | selenoprotein F, plasma, 1                                                             |
| NFATC2     | -1.637 | 0.042  | 228442_at    | nuclear factor of activated T-cells, cytoplasmic, calcineurin-dependent 2              |
| MAD2L2     | 0.772  | 0.042  | 223234_at    | MAD2 mitotic arrest deficient-like 2 (yeast)                                           |
| AHCY       | 1.208  | 0.042  | 200903_s_at  | adenosylhomocysteinase                                                                 |
| GADD45GIP1 | 0.714  | 0.042  | 212891_s_at  | growth arrest and DNA-damage-inducible, gamma interacting protein 1                    |
| Mar-05     | 0.769  | 0.042  | 218582_at    | membrane-associated ring finger (C3HC4) 5                                              |
| TCEB1      | 0.586  | 0.0421 | 202824_s_at  | transcription elongation factor B (SIII), polypeptide 1 (15kDa, elongin C)             |
| KIF15      | 1.699  | 0.0421 | 219306_at    | kinesin family member 15                                                               |
| LRFN4      | 0.715  | 0.0421 | 219491_at    | leucine rich repeat and fibronectin type III domain containing 4                       |
| EMC1       | 0.594  | 0.0421 | 212395_s_at  | ER membrane protein complex subunit 1                                                  |
| MRPL50     | 0.304  | 0.0422 | 225581_s_at  | mitochondrial ribosomal protein L50                                                    |
| SGCE       | -1.162 | 0.0423 | 204688_at    | sarcoglycan, epsilon                                                                   |
| NCAPD3     | 1.775  | 0.0423 | 212789_at    | non-SMC condensin II complex, subunit D3                                               |
| GTF3C1     | 0.654  | 0.0423 | 202320_at    | general transcription factor IIIC, polypeptide 1, alpha 220kDa                         |
| GTF2I      | 0.969  | 0.0423 | 210892_s_at  | general transcription factor III                                                       |
| ADAM10     | 1.348  | 0.0423 | 202604_x_at  | ADAM metallopeptidase domain 10                                                        |
| TARS       | 0.949  | 0.0424 | 201263_at    | threonyl-tRNA synthetase                                                               |
| CETN2      | 0.489  | 0.0426 | 209194_at    | centrin, EF-hand protein, 2                                                            |
| PGAP3      | -0.735 | 0.0426 | 221811_at    | post-GPI attachment to proteins 3                                                      |
| LYZ        | -2.321 | 0.0426 | 213975_s_at  | lysozyme                                                                               |
| EGFL6      | -3.048 | 0.0427 | 219454_at    | EGF-like domain, multiple 6                                                            |
| CD320      | 0.811  | 0.0427 | 218529_at    | CD320 molecule                                                                         |
| NMRAL1     | 0.872  | 0.0427 | 223206_s_at  | NmrA-like family domain containing 1                                                   |
| AASDHPPT   | 0.797  | 0.0427 | 202170_s_at  | aminoadipate-semialdehyde dehydrogenase-phosphopantetheinyl transferase                |
| ORC6       | 1.316  | 0.0427 | 219105_x_at  | origin recognition complex, subunit 6                                                  |
| TM2D2      | 0.64   | 0.0427 | 224413_s_at  | TM2 domain containing 2                                                                |
| NUMB       | -0.677 | 0.0428 | 207545_s_at  | numb homolog (Drosophila)                                                              |
| CCL18      | -3.378 | 0.0429 | 32128_at     | chemokine (C-C motif) ligand 18 (pulmonary and activation-regulated)                   |
| ITGA9      | -1.795 | 0.0429 | 227297_at    | integrin, alpha 9                                                                      |
| C8orf33    | 0.976  | 0.0429 | 222551_s_at  | chromosome 8 open reading frame 33                                                     |
| DENND1A    | 2.248  | 0.043  | 219763_at    | DENN/MADD domain containing 1A                                                         |
| ZDHHC2     | -1.64  | 0.0431 | 244779_at    | zinc finger, DHHC-type containing 2                                                    |
| UNC50      | 0.279  | 0.0431 | 203583_at    | unc-50 homolog (C. elegans)                                                            |
| ZMAT3      | 1.363  | 0.0432 | 228315_at    | zinc finger, matrin-type 3                                                             |
| VTA1       | 0.729  | 0.0432 | 224437_s_at  | Vps20-associated 1 homolog (S. cerevisiae)                                             |
| CLUAP1     | 0.79   | 0.0432 | 204576_s_at  | clustrin associated protein 1                                                          |
| TTC3P1     | 0.84   | 0.0432 | 1569472_s_at | tetratricopeptide repeat domain 3 /// tetratricopeptide repeat domain 3 pseudogene 1   |
| SHB        | 1.058  | 0.0432 | 204656_at    | Src homology 2 domain containing adaptor protein B                                     |
| HJURP      | 1.753  | 0.0432 | 218726_at    | Holliday junction recognition protein                                                  |
| ZNF284     | -0.733 | 0.0433 | 239462_at    | Zinc finger protein 284                                                                |
| CXCL3      | -2.458 | 0.0433 | 207850_at    | chemokine (C-X-C motif) ligand 3                                                       |
| SNRPA1     | 0.716  | 0.0433 | 215722_s_at  | small nuclear ribonucleoprotein polypeptide A'                                         |
| MTMR2      | 0.854  | 0.0433 | 203212_s_at  | myotubularin related protein 2                                                         |
| LRRC8D     | 0.705  | 0.0433 | 218684_at    | leucine rich repeat containing 8 family, member D                                      |
| CENPH      | 0.797  | 0.0433 | 231772_x_at  | centromere protein H                                                                   |
| ZWINT      | 2.465  | 0.0436 | 204026_s_at  | ZW10 interactor                                                                        |
| FRMD3      | -1.805 | 0.0437 | 229893_at    | FERM domain containing 3                                                               |
| ZBED3      | -0.98  | 0.0437 | 235109_at    | zinc finger, BED-type containing 3                                                     |
| HAT1       | 0.622  | 0.0437 | 203138_at    | histone acetyltransferase 1                                                            |
| ZZEF1      | -0.497 | 0.0437 | 212601_at    | zinc finger, ZZ-type with EF-hand domain 1                                             |
| SPAG5      | 1.887  | 0.0437 | 203145_at    | sperm associated antigen 5                                                             |
| RRAS2      | 1.391  | 0.0441 | 208456_s_at  | related RAS viral (r-ras) oncogene homolog 2                                           |
| CYP26A1    | 3.502  | 0.0441 | 206424_at    | cytochrome P450, family 26, subfamily A, polypeptide 1                                 |
| TCF19      | 1.35   | 0.0441 | 223274_at    | transcription factor 19                                                                |

|              |        |        |              |                                                                                                                                 |
|--------------|--------|--------|--------------|---------------------------------------------------------------------------------------------------------------------------------|
| TTK          | 2.506  | 0.0442 | 204822_at    | TTK protein kinase                                                                                                              |
| C15orf38-AP3 | 1.104  | 0.0443 | 202399_s_at  | adaptor-related protein complex 3, sigma 2 subunit /// C15orf38-AP3S2 readthrough                                               |
| LRP11        | 1.604  | 0.0443 | 225060_at    | low density lipoprotein receptor-related protein 11                                                                             |
| TNFRSF14     | -0.794 | 0.0445 | 209354_at    | tumor necrosis factor receptor superfamily, member 14                                                                           |
| TSFM         | 0.714  | 0.0445 | 212656_at    | Ts translation elongation factor, mitochondrial                                                                                 |
| CSTF3        | 0.991  | 0.0446 | 229665_at    | cleavage stimulation factor, 3' pre-rRNA, subunit 3, 77kDa                                                                      |
| SGPP1        | -0.525 | 0.0446 | 223391_at    | sphingosine-1-phosphate phosphatase 1                                                                                           |
| OTUD6B       | 0.562  | 0.0447 | 222825_at    | OTU domain containing 6B                                                                                                        |
| UNG          | 0.947  | 0.0447 | 202330_s_at  | uracil-DNA glycosylase                                                                                                          |
| C3orf14      | 1.113  | 0.0447 | 219288_at    | chromosome 3 open reading frame 14                                                                                              |
| C1orf54      | -1.133 | 0.0447 | 219506_at    | chromosome 1 open reading frame 54                                                                                              |
| CNPY3        | 0.773  | 0.0447 | 1552977_a_at | canopy 3 homolog (zebrafish)                                                                                                    |
| SLC44A1      | -0.865 | 0.0449 | 228486_at    | solute carrier family 44, member 1                                                                                              |
| HNRNPAB      | 0.657  | 0.0449 | 201277_s_at  | heterogeneous nuclear ribonucleoprotein A/B                                                                                     |
| C15orf23     | 0.996  | 0.045  | 225300_at    | chromosome 15 open reading frame 23                                                                                             |
| SLAIN2       | -0.668 | 0.045  | 224844_at    | SLAIN motif family, member 2                                                                                                    |
| EPB41L2      | -1.436 | 0.045  | 201719_s_at  | erythrocyte membrane protein band 4.1-like 2                                                                                    |
| TNPO2        | 0.402  | 0.045  | 226428_at    | transportin 2                                                                                                                   |
| CTPS1        | 1.097  | 0.045  | 202613_at    | CTP synthase 1                                                                                                                  |
| HSPB11       | 1.207  | 0.0451 | 203960_s_at  | heat shock protein family B (small), member 11                                                                                  |
| MAP2         | -1.676 | 0.0451 | 225540_at    | microtubule-associated protein 2                                                                                                |
| MAPK8        | -0.569 | 0.0452 | 229664_at    | mitogen-activated protein kinase 8                                                                                              |
| IER2         | -1.976 | 0.0452 | 202081_at    | immediate early response 2                                                                                                      |
| MIR4448      | -1.148 | 0.0452 | 220692_at    | microRNA 4448                                                                                                                   |
| PPP2R3C      | -0.849 | 0.0452 | 218852_at    | protein phosphatase 2, regulatory subunit B', gamma                                                                             |
| PKC3         | -0.819 | 0.0452 | 228959_at    | pyruvate dehydrogenase kinase, isozyme 3                                                                                        |
| NOS1AP       | 0.45   | 0.0452 | 1563512_at   | Nitric oxide synthase 1 (neuronal) adaptor protein                                                                              |
| DNAJC13      | 0.572  | 0.0452 | 212467_at    | DnaJ (Hsp40) homolog, subfamily C, member 13                                                                                    |
| TMEM60       | 0.66   | 0.0452 | 223396_at    | transmembrane protein 60                                                                                                        |
| ZNF519       | 1.594  | 0.0454 | 1568873_at   | zinc finger protein 519                                                                                                         |
| SARS2        | -1.699 | 0.0454 | 220233_at    | F-box protein 17 /// seryl-tRNA synthetase 2, mitochondrial                                                                     |
| NR2F1        | -1.39  | 0.0454 | 209506_s_at  | nuclear receptor subfamily 2, group F, member 1                                                                                 |
| LARP1        | 0.354  | 0.0454 | 212137_at    | La ribonucleoprotein domain family, member 1                                                                                    |
| RNF146       | -0.586 | 0.0456 | 223886_s_at  | ring finger protein 146                                                                                                         |
| C11orf63     | -0.55  | 0.0456 | 220141_at    | chromosome 11 open reading frame 63                                                                                             |
| DCAF17       | 0.548  | 0.0456 | 220172_at    | DDB1 and CUL4 associated factor 17                                                                                              |
| LOC10050723  | 1.123  | 0.0456 | 228799_at    | uncharacterized LOC100507239                                                                                                    |
| GGPD5        | 1.468  | 0.0456 | 32502_at     | glycerophosphodiester phosphodiesterase domain containing 5                                                                     |
| PLEKHG5      | -0.296 | 0.0458 | 227142_at    | pleckstrin homology domain containing, family G (with RhoGEF domain) member 5                                                   |
| DEPDC1B      | 1.944  | 0.0458 | 226980_at    | DEP domain containing 1B                                                                                                        |
| ARMC10       | 1.129  | 0.0458 | 223328_at    | armadillo repeat containing 10                                                                                                  |
| ERCC1        | -0.929 | 0.0459 | 228131_at    | excision repair cross-complementing rodent repair deficiency, complementation group 1 (includes overlapping antisense sequence) |
| PSMB7        | 0.573  | 0.0459 | 200786_at    | proteasome (prosome, macropain) subunit, beta type, 7                                                                           |
| YEATS2       | 0.539  | 0.046  | 221203_s_at  | YEATS domain containing 2                                                                                                       |
| CAMKK2       | -0.734 | 0.046  | 213812_s_at  | calcium/calmodulin-dependent protein kinase kinase 2, beta                                                                      |
| HNRNP9       | 0.322  | 0.046  | 208766_s_at  | heterogeneous nuclear ribonucleoprotein R                                                                                       |
| UBE3A        | 0.266  | 0.0461 | 211285_s_at  | ubiquitin protein ligase E3A                                                                                                    |
| STX16        | 0.736  | 0.0461 | 1558249_s_at | syntaxin 16                                                                                                                     |
| EMC4         | 0.684  | 0.0461 | 223043_at    | ER membrane protein complex subunit 4                                                                                           |
| ND4          | -0.334 | 0.0463 | 224373_s_at  | NADH dehydrogenase, subunit 4 (complex I)                                                                                       |
| CCDC138      | 0.914  | 0.0463 | 235644_at    | coiled-coil domain containing 138                                                                                               |
| PRMT5        | 0.774  | 0.0463 | 1564520_s_at | protein arginine methyltransferase 5                                                                                            |
| SSFA2        | -1.036 | 0.0463 | 202506_at    | sperm specific antigen 2                                                                                                        |
| LCORL        | -0.497 | 0.0464 | 232293_at    | ligand dependent nuclear receptor corepressor-like                                                                              |
| LRR1         | 1.083  | 0.0464 | 235113_at    | leucine rich repeat protein 1                                                                                                   |
| C2orf47      | 0.608  | 0.0465 | 219176_at    | chromosome 2 open reading frame 47                                                                                              |
| Sep-08       | -1.248 | 0.0466 | 226627_at    | septin 8                                                                                                                        |
| PPFIA2       | -1.323 | 0.0466 | 232073_at    | protein tyrosine phosphatase, receptor type, f polypeptide (PTPRF), interacting protein (liprin), alpha 2                       |
| NPEPL1       | 0.389  | 0.0467 | 89476_r_at   | aminopeptidase-like 1                                                                                                           |
| PSMG4        | 0.582  | 0.0467 | 228217_s_at  | proteasome (prosome, macropain) assembly chaperone 4                                                                            |
| KREMEN1      | -1.648 | 0.0467 | 227250_at    | kringle containing transmembrane protein 1                                                                                      |
| SORD         | 0.637  | 0.0467 | 201562_s_at  | sorbitol dehydrogenase                                                                                                          |
| ALKBH7       | 1.096  | 0.0467 | 227878_s_at  | alkB, alkylation repair homolog 7 (E. coli)                                                                                     |
| PHF2         | -0.527 | 0.0467 | 212726_at    | PHD finger protein 2                                                                                                            |
| PARS2        | 0.444  | 0.0467 | 227348_at    | prolyl-tRNA synthetase 2, mitochondrial (putative)                                                                              |
| ARPC5        | 0.941  | 0.0467 | 1555797_a_at | actin related protein 2/3 complex, subunit 5, 16kDa                                                                             |
| PMS2P3       | 0.872  | 0.0467 | 214473_x_at  | postmeiotic segregation increased 2 pseudogene 3                                                                                |
| NSD1         | 1      | 0.0467 | 235760_at    | nuclear receptor binding SET domain protein 1                                                                                   |
| N4BP1        | -0.837 | 0.0468 | 221867_at    | NEDD4 binding protein 1                                                                                                         |
| WFS1         | -1.532 | 0.0468 | 202908_at    | Wolfram syndrome 1 (wolframin)                                                                                                  |
| SWI5         | 1.087  | 0.0469 | 226027_at    | SWI5 recombination repair homolog (yeast)                                                                                       |
| DUSP2        | -2.607 | 0.047  | 204794_at    | dual specificity phosphatase 2                                                                                                  |
| STMN1        | 0.272  | 0.047  | 217714_x_at  | microRNA 3917 /// stathmin 1                                                                                                    |
| GLG1         | 0.571  | 0.0471 | 214730_s_at  | golgi glycoprotein 1                                                                                                            |
| LGALS3       | -1.6   | 0.0471 | 1557197_a_at | lectin, galactoside-binding, soluble, 3                                                                                         |

|             |        |        |              |                                                                                                     |
|-------------|--------|--------|--------------|-----------------------------------------------------------------------------------------------------|
| MYO15B      | -1.477 | 0.0471 | 219173_at    | myosin XVB pseudogene                                                                               |
| LOC642236   | -0.858 | 0.0471 | 242770_at    | FSHD region gene 1 pseudogene                                                                       |
| PPP1R21     | 0.395  | 0.0471 | 1554145_s_at | protein phosphatase 1, regulatory subunit 21                                                        |
| TAX1BP3     | 0.484  | 0.0471 | 209154_at    | P2RX5-TAX1BP3 readthrough /// Tax1 (human T-cell leukemia virus type I) binding protein 3           |
| CLTB        | 1.028  | 0.0471 | 205172_x_at  | clathrin, light chain B                                                                             |
| TXNDC17     | 0.679  | 0.0473 | 224511_s_at  | thioredoxin domain containing 17                                                                    |
| ZNF202      | 0.999  | 0.0473 | 204329_s_at  | zinc finger protein 202                                                                             |
| WTH3DI      | 0.548  | 0.0474 | 210406_s_at  | RAB6A, member RAS oncogene family /// RAB6C, member RAS oncogene family /// RAB6C-like              |
| TRAPP4      | 0.854  | 0.0474 | 217959_s_at  | microRNA 3656 /// trafficking protein particle complex 4                                            |
| CAV1        | -1.437 | 0.0474 | 212097_at    | caveolin 1, caveolae protein, 22kDa                                                                 |
| POC1A       | 0.481  | 0.0474 | 226355_at    | POC1 centriolar protein homolog A (Chlamydomonas)                                                   |
| LRRC42      | 1.196  | 0.0474 | 215084_s_at  | leucine rich repeat containing 42                                                                   |
| ABC86       | 1.328  | 0.0474 | 203192_at    | ATP-binding cassette, sub-family B (MDR/TAP), member 6                                              |
| FBLN5       | -1.727 | 0.0474 | 203088_at    | fibulin 5                                                                                           |
| WDR61       | 0.255  | 0.0475 | 232075_at    | WD repeat domain 61                                                                                 |
| ATAD2       | 0.807  | 0.0475 | 228401_at    | ATPase family, AAA domain containing 2                                                              |
| TRIM2       | -0.8   | 0.0475 | 202342_s_at  | tripartite motif containing 2                                                                       |
| ZBTB80S     | 0.611  | 0.0475 | 228970_at    | zinc finger and BTB domain containing 8 opposite strand                                             |
| MYL12B      | 0.37   | 0.0476 | 221474_at    | myosin, light chain 12B, regulatory                                                                 |
| DPP8        | 0.423  | 0.0476 | 220939_s_at  | dipeptidyl-peptidase 8                                                                              |
| HEATR6      | 0.52   | 0.0476 | 218991_at    | HEAT repeat containing 6                                                                            |
| DPY30       | 0.697  | 0.0476 | 224129_s_at  | dpy-30 homolog (C. elegans)                                                                         |
| WDR74       | 0.918  | 0.0476 | 221712_s_at  | WD repeat domain 74                                                                                 |
| CDK1        | 2.372  | 0.0476 | 210559_s_at  | cyclin-dependent kinase 1                                                                           |
| CDC42EP5    | -1.27  | 0.0476 | 227850_x_at  | CDC42 effector protein (Rho GTPase binding) 5                                                       |
| NUDT6       | -1.191 | 0.0476 | 220183_s_at  | nudix (nucleoside diphosphate linked moiety X)-type motif 6                                         |
| CSRNP1      | -2.202 | 0.0477 | 225557_at    | cysteine-serine-rich nuclear protein 1                                                              |
| WDR46       | 0.738  | 0.0478 | 209196_at    | WD repeat domain 46                                                                                 |
| GUCY1B3     | -1.642 | 0.0478 | 203817_at    | guanylate cyclase 1, soluble, beta 3                                                                |
| MSL3        | 1.036  | 0.0479 | 236165_at    | male-specific lethal 3 homolog (Drosophila)                                                         |
| TFDP2       | 0.795  | 0.048  | 203589_s_at  | transcription factor Dp-2 (E2F dimerization partner 2)                                              |
| TRDAP       | 0.89   | 0.048  | 204649_at    | trophinin associated protein (tastin)                                                               |
| PRTG        | -0.99  | 0.048  | 229073_at    | protogenin                                                                                          |
| ELF2        | -0.393 | 0.048  | 242735_x_at  | E74-like factor 2 (ets domain transcription factor)                                                 |
| SOX17       | -2.195 | 0.048  | 230943_at    | SRY (sex determining region Y)-box 17                                                               |
| RRN3P1      | -1.848 | 0.048  | 215211_at    | RNA polymerase 1 transcription factor homolog (S. cerevisiae) pseudogene 1                          |
| TSHZ2       | -2.24  | 0.0481 | 238577_s_at  | teashirt zinc finger homeobox 2                                                                     |
| LOC10050659 | 0.759  | 0.0481 | 1559026_at   | uncharacterized LOC100506599                                                                        |
| TUFM        | 0.826  | 0.0481 | 201113_at    | Tu translation elongation factor, mitochondrial                                                     |
| ACTR2       | 0.425  | 0.0482 | 200728_at    | ARP2 actin-related protein 2 homolog (yeast)                                                        |
| SIRT2       | -1.42  | 0.0483 | 1558331_at   | sirtuin 2                                                                                           |
| SP140L      | 0.732  | 0.0483 | 223934_at    | SP140 nuclear body protein-like                                                                     |
| C19orf10    | 0.946  | 0.0483 | 216483_s_at  | chromosome 19 open reading frame 10                                                                 |
| THAP5       | 0.694  | 0.0484 | 227636_at    | THAP domain containing 5                                                                            |
| ARAP3       | -1.652 | 0.0484 | 218950_at    | ArfGAP with RhoGAP domain, ankyrin repeat and PH domain 3                                           |
| SSR2        | 0.708  | 0.0484 | 200652_at    | signal sequence receptor, beta (translocon-associated protein beta)                                 |
| NMU         | 3.451  | 0.0484 | 206023_at    | neuromedin U                                                                                        |
| UNC45A      | 0.596  | 0.0484 | 221708_s_at  | unc-45 homolog A (C. elegans)                                                                       |
| WWTR1       | 1.055  | 0.0484 | 202134_s_at  | WW domain containing transcription regulator 1                                                      |
| CD52        | -2.217 | 0.0485 | 34210_at     | CD52 molecule                                                                                       |
| VSIG2       | -2.145 | 0.0485 | 229369_at    | V-set and immunoglobulin domain containing 2                                                        |
| SIPR3       | -1.491 | 0.0485 | 228176_at    | sphingosine-1-phosphate receptor 3                                                                  |
| ANAPC7      | 0.451  | 0.0485 | 225554_s_at  | anaphase promoting complex subunit 7                                                                |
| CLNS1A      | 0.941  | 0.0485 | 209143_s_at  | chloride channel, nucleotide-sensitive, 1A                                                          |
| KRT6A       | 2.533  | 0.0485 | 209125_at    | keratin 6A                                                                                          |
| RBKS        | 1.441  | 0.0486 | 219222_at    | ribokinase                                                                                          |
| TNFSF10     | -1.685 | 0.0486 | 202687_s_at  | tumor necrosis factor (ligand) superfamily, member 10                                               |
| MYRIP       | -2.827 | 0.0487 | 214156_at    | myosin VIIA and Rab interacting protein                                                             |
| RFWD2       | 0.294  | 0.0487 | 234950_s_at  | ring finger and WD repeat domain 2, E3 ubiquitin protein ligase                                     |
| DPM2        | 0.625  | 0.0487 | 209391_at    | dolichyl-phosphate mannosyltransferase polypeptide 2, regulatory subunit                            |
| SPEF2       | -0.545 | 0.0487 | 1552716_at   | sperm flagellar 2                                                                                   |
| KIF18B      | 2.321  | 0.0487 | 222039_at    | kinesin family member 18B                                                                           |
| BMS1        | 0.439  | 0.0487 | 203082_at    | BMS1 homolog, ribosome assembly protein (yeast)                                                     |
| PLAGL1      | -1.256 | 0.0488 | 209318_x_at  | pleiomorphic adenoma gene-like 1                                                                    |
| EIF4E       | -0.264 | 0.0489 | 242674_at    | eukaryotic translation initiation factor 4E                                                         |
| OSMR        | 1.546  | 0.0489 | 205729_at    | oncostatin M receptor                                                                               |
| SERPINH1    | 1.177  | 0.0489 | 207714_s_at  | serpin peptidase inhibitor, clade H (heat shock protein 47), member 1, (collagen binding protein 1) |
| SLC25A12    | -0.675 | 0.049  | 203339_at    | solute carrier family 25 (aspartate/glutamate carrier), member 12                                   |
| LEO1        | 0.634  | 0.049  | 235096_at    | Leo1, Paf1/RNA polymerase II complex component, homolog (S. cerevisiae)                             |
| HARBI1      | 0.62   | 0.049  | 241498_at    | harbinger transposase derived 1                                                                     |
| STC2        | 1.314  | 0.049  | 203439_s_at  | stanniocalcin 2                                                                                     |
| NDRG2       | -1.277 | 0.0491 | 206453_s_at  | NDRG family member 2                                                                                |
| HOXA3       | -1.255 | 0.0491 | 235521_at    | homeobox A3                                                                                         |
| DUSP7       | -1.019 | 0.0492 | 213848_at    | dual specificity phosphatase 7                                                                      |
| DCTN4       | 0.712  | 0.0492 | 218013_x_at  | dynactin 4 (p62)                                                                                    |



|        |        |        |             |                                                                                                                                                                                                                                                                 |
|--------|--------|--------|-------------|-----------------------------------------------------------------------------------------------------------------------------------------------------------------------------------------------------------------------------------------------------------------|
| PMS2P6 | 0.77   | 0.0492 | 215667_x_at | PMS2 postmeiotic segregation increased 2 (S. cerevisiae) pseudogene /// PMS2 postmeiotic segregation increased 2 (S. cerevisiae)-like /// postmeiotic segregation increased 2-like 2 pseudogene /// postmeiotic segregation increased 2 pseudogene 1 /// postme |
| GTF3A  | 0.534  | 0.0493 | 201338_x_at | general transcription factor IIIA                                                                                                                                                                                                                               |
| UBE2E1 | -0.527 | 0.0496 | 212519_at   | ubiquitin-conjugating enzyme E2E 1                                                                                                                                                                                                                              |
| CCL13  | -1.539 | 0.0497 | 206407_s_at | chemokine (C-C motif) ligand 13                                                                                                                                                                                                                                 |
| VEZF1  | -0.414 | 0.0497 | 202173_s_at | vascular endothelial zinc finger 1                                                                                                                                                                                                                              |
| ATIC   | 1.1    | 0.0497 | 208758_at   | 5-aminoimidazole-4-carboxamide ribonucleotide formyltransferase/IMP cyclohydrolase                                                                                                                                                                              |
| TRAK1  | -0.415 | 0.0497 | 202079_s_at | trafficking protein, kinesin binding 1                                                                                                                                                                                                                          |
| HSPA9  | 0.68   | 0.0497 | 200692_s_at | heat shock 70kDa protein 9 (mortalin)                                                                                                                                                                                                                           |
| TTC7B  | -0.961 | 0.0498 | 226152_at   | tetratricopeptide repeat domain 7B                                                                                                                                                                                                                              |
| GSTM2  | -1.602 | 0.0499 | 204418_x_at | glutathione S-transferase mu 2 (muscle)                                                                                                                                                                                                                         |
