# Supplementary material for: Consistent gene expression profiles in MexTAg transgenic mouse and wild type mouse asbestos-induced mesothelioma
Source: Springer Nature journal article supplement (doi:10.1186/s12885-015-1953-y), 2015-12-01
Supplement: MOESM5 [file 9745688]

| Gene_A        | logFC_WTtu_WTn | pval_WTtu_WTn | logFC_hiTAgtu_WTn | pval_hiTAgtu_WTn | logFC_loTAgtu_WTn | pval_loTAgtu_WTn | Desc               |
|---------------|----------------|---------------|-------------------|------------------|-------------------|------------------|--------------------|
| Abcb1a        | -2.803         | .000988       | -2.772            | .000839          | -2.957            | .000482          | "ATP-binding       |
| Actl6a        | .940           | .005930       | 1.408             | .000089          | 1.503             | .000050          | actin-like         |
| Agtr1a        | -8.946         | .000006       | -8.226            | .000010          | -8.619            | .000008          | "angiotensin       |
| Angptl1       | -3.120         | .017000       | -2.548            | .038200          | -3.177            | .011400          | angiotensin-like   |
| Arhgef4       | -1.178         | .002990       | -1.108            | .003780          | -1.317            | .000852          | Rho                |
| Arid5b        | -2.632         | .005950       | -1.730            | .029900          | -2.413            | .008920          | AT                 |
| Aspm          | 4.154          | .000000       | 4.895             | .000000          | 4.556             | .000000          | "asp               |
| 4933424B01Rik | .921           | .022000       | 1.124             | .003970          | .940              | .014800          | "asunder           |
| Atad2         | 2.922          | .000047       | 3.751             | .000002          | 3.487             | .000005          | "ATPase            |
| Atxn7l1       | -.177          | .000130       | -.177             | .000096          | -.175             | .000127          | ataxin             |
| Bcl2l2        | -.791          | .031200       | -.366             | .021100          | -.366             | .020700          | BCL2-like          |
| Bms1          | .992           | .010600       | 1.038             | .005750          | .828              | .023400          | "BMS1              |
| Brca2         | 2.680          | .000824       | 3.563             | .000029          | 2.673             | .000697          | breast             |
| Bub1          | 3.686          | .000002       | 4.481             | .000000          | 4.267             | .000000          | budding            |
| 2010107G23Rik | -2.961         | .002350       | -2.451            | .008330          | -3.116            | .001180          | RIKEN              |
| 1500015O10Rik | -2.924         | .004310       | -2.993            | .002700          | -2.831            | .004400          | RIKEN              |
| Cbx1          | .885           | .030200       | .945              | .015400          | 1.140             | .003970          | chromobox          |
| Cbx5          | 1.512          | .006900       | 3.034             | .000518          | 1.155             | .030300          | chromobox          |
| Ccbe1         | -.979          | .000425       | -.978             | .000329          | -.906             | .000746          | collagen           |
| Ccnb2         | 3.141          | .000030       | 3.504             | .000006          | 3.395             | .000011          | cyclin             |
| Cd93          | -.104          | .038700       | -.104             | .029900          | -.104             | .030200          | CD93               |
| Cdc20         | 2.804          | .000076       | 3.176             | .000013          | 3.036             | .000026          | cell               |
| Cdc6          | 4.181          | .000003       | 5.031             | .000000          | 4.368             | .000001          | cell               |
| Cdk1          | 2.438          | .000045       | 2.954             | .000003          | 2.500             | .000029          | cyclin-dependent   |
| Cdk2ap1       | .860           | .032000       | .890              | .020300          | .853              | .020600          | CDK2               |
| Cds2          | -.896          | .005410       | -.875             | .004940          | -1.128            | .000537          | CDP-diacylglycerol |
| Cenpa         | 3.084          | .000168       | 3.686             | .000016          | 3.179             | .000104          | centromere         |
| Cenpc1        | .890           | .048500       | 1.106             | .011800          | 1.370             | .002300          | centromere         |
| Cenpf         | 4.341          | .000005       | 5.158             | .000000          | 4.750             | .000001          | centromere         |
| Cenph         | 3.156          | .000006       | 3.798             | .000000          | 3.608             | .000001          | centromere         |
| Cenpn         | 3.866          | .000005       | 4.655             | .000000          | 3.641             | .000010          | centromere         |
| Cgrrf1        | -.697          | .013800       | -.794             | .003910          | -.754             | .005960          | cell               |
| Chek1         | 3.508          | .000195       | 4.475             | .000009          | 4.319             | .000017          | checkpoint         |
| Ckap2         | 1.821          | .000927       | 2.344             | .000047          | 1.582             | .002680          | cytoskeleton       |
| Ckap5         | 1.225          | .003170       | 1.697             | .000091          | 1.051             | .008300          | cytoskeleton       |
| Creb3         | -.271          | .000106       | -.255             | .000155          | -.286             | .000051          | cAMP               |
| Cse1l         | 1.380          | .004460       | 1.539             | .001310          | 1.692             | .000560          | chromosome         |
| Cyb5r3        | -1.959         | .005730       | -1.624            | .003480          | -2.428            | .000075          | cytochrome         |
| Dctpp1        | 1.938          | .038600       | 2.280             | .010700          | 1.901             | .031100          | dCTP               |
| Depdc1a       | 2.951          | .000608       | 4.319             | .000006          | 4.470             | .000005          | DEP                |
| Depdc1b       | 2.503          | .001270       | 3.716             | .000013          | 2.624             | .000661          | DEP                |
| Dna2          | 2.827          | .000047       | 4.288             | .000000          | 3.510             | .000003          | DNA                |
| Dnajc9        | 1.410          | .004040       | 2.176             | .000037          | 1.629             | .000881          | "DnaJ              |
| Dock8         | -.103          | .038700       | -.103             | .029900          | -.103             | .030200          | dedicator          |
| Dpy30         | 1.342          | .007550       | 1.379             | .004620          | 1.138             | .018100          | dpy-30             |
| Dtymk         | 1.510          | .007720       | 1.198             | .027600          | 2.058             | .000385          | deoxythymidylate   |
| E2f7          | 4.257          | .000010       | 5.298             | .000000          | 4.121             | .000013          | E2F                |
| Ect2          | 2.990          | .000064       | 4.172             | .000001          | 3.812             | .000003          | ect2               |
| Egfr          | -.107          | .038700       | -.107             | .029900          | -.107             | .030200          | epidermal          |

|               |        |         |        |         |        |         |                        |
|---------------|--------|---------|--------|---------|--------|---------|------------------------|
| 2900064A13Rik | -2.430 | .004130 | -1.988 | .014300 | -1.791 | .026800 | ER                     |
| Emcn          | -.889  | .000000 | -.889  | .000000 | -.889  | .000000 | endomucin              |
| Eme1          | 3.056  | .008150 | 3.472  | .002180 | 2.658  | .016600 | essential              |
| Epha3         | -2.340 | .022000 | -2.458 | .012200 | -2.045 | .034100 | Eph                    |
| Eri2          | 1.722  | .022100 | 2.041  | .005070 | 2.220  | .002620 | exoribonuclease        |
| Espl1         | 3.012  | .000939 | 4.024  | .000032 | 2.619  | .002700 | extra                  |
| Ezh2          | 2.322  | .000021 | 3.192  | .000000 | 3.005  | .000001 | enhancer               |
| Fam13c        | -2.650 | .016700 | -2.695 | .011200 | -2.830 | .008140 | "family                |
| Fanca         | 3.037  | .000063 | 4.002  | .000002 | 2.486  | .000429 | "Fanconi               |
| Fancd2        | 2.923  | .000448 | 3.477  | .000051 | 2.923  | .000366 | "Fanconi               |
| Fancf         | 1.478  | .024700 | 1.477  | .019500 | 1.984  | .002170 | "Fanconi               |
| Fanci         | 2.161  | .004070 | 2.776  | .000295 | 2.481  | .000940 | "Fanconi               |
| Fen1          | 2.687  | .000002 | 2.965  | .000000 | 2.961  | .000000 | flap                   |
| Fgr           | -.032  | .042800 | -.032  | .034000 | -.032  | .034300 | Gardner-Rasheed        |
| Fmo2          | -9.102 | .000009 | -9.211 | .000006 | -8.368 | .000022 | flavin                 |
| Fmo3          | -5.031 | .000111 | -5.241 | .000051 | -4.021 | .000908 | flavin                 |
| Foxm1         | 4.260  | .000015 | 5.767  | .000000 | 3.485  | .000126 | forkhead               |
| Foxp1         | 2.059  | .003530 | 1.676  | .013000 | 1.874  | .010100 | forkhead               |
| Ggct          | -.049  | .039600 | -.049  | .031000 | -.049  | .031200 | gamma-glutamyl         |
| Gimap6        | -.128  | .044700 | -.129  | .033900 | -.120  | .047800 | "GTPase                |
| Gins1         | 3.550  | .000120 | 4.179  | .000013 | 3.993  | .000028 | GIN5                   |
| Gins2         | 2.691  | .000080 | 3.753  | .000001 | 2.485  | .000158 | GIN5                   |
| Gmcl1         | 1.869  | .005310 | .631   | .029500 | .687   | .017900 | germ                   |
| Gmnn          | 2.198  | .000900 | 3.044  | .000020 | 2.906  | .000040 | geminin                |
| Gtf2h2        | 1.151  | .035300 | 1.118  | .030300 | 1.477  | .005120 | "general               |
| Hat1          | 1.659  | .004310 | 2.723  | .000020 | 1.917  | .000942 | histone                |
| Hells         | 4.127  | .000000 | 5.097  | .000000 | 4.577  | .000000 | "helicase              |
| Hjurp         | 1.519  | .000593 | 2.378  | .000003 | 1.175  | .004770 | Holliday               |
| Hmmr          | 3.135  | .000029 | 3.620  | .000004 | 3.664  | .000004 | hyaluronan             |
| Hn1l          | 1.433  | .005150 | 1.221  | .012800 | 1.367  | .005800 | hematological          |
| Hnmt          | -.481  | .003870 | -.480  | .002940 | -.478  | .003110 | histamine              |
| Hnrnpab       | .934   | .001430 | .965   | .000804 | .946   | .002010 | heterogeneous          |
| Hpgd          | -6.768 | .000000 | -6.751 | .000000 | -6.020 | .000001 | hydroxyprostaglandin   |
| Il1rap        | -.035  | .041700 | -.035  | .033000 | -.035  | .033200 | interleukin            |
| Ilf3          | 1.336  | .038700 | 1.391  | .024100 | 1.505  | .014700 | interleukin            |
| Jam2          | -2.808 | .000001 | -2.837 | .000001 | -2.821 | .000001 | junction               |
| Et14          | -.723  | .000000 | -.740  | .000000 | -.755  | .000000 | enhancer               |
| C330027C09Rik | 3.267  | .000035 | 4.359  | .000001 | 3.664  | .000008 | RIKEN                  |
| Kif13b        | -.197  | .040400 | -.196  | .032700 | -2.318 | .013400 | kinesin                |
| Kif23         | 5.403  | .000000 | 6.012  | .000000 | 5.615  | .000000 | kinesin                |
| Kif2c         | 3.918  | .000006 | 4.319  | .000001 | 3.996  | .000004 | kinesin                |
| Lmbr1         | -.684  | .000163 | -.704  | .000087 | -.642  | .000264 | limb                   |
| Lmcd1         | -7.872 | .001200 | -7.345 | .001760 | -5.918 | .010000 | LIM                    |
| Lrpprc        | 1.324  | .033200 | 1.525  | .010300 | 1.323  | .025700 | leucine-rich           |
| Lrr1          | 4.090  | .000786 | 5.333  | .000034 | 5.148  | .000060 | leucine                |
| Lsm3          | 1.669  | .005400 | 2.128  | .000449 | 1.443  | .012000 | "LSM3                  |
| Lsm5          | 1.588  | .001360 | 1.739  | .000439 | 1.555  | .001350 | "LSM5                  |
| Mad2l1        | 2.374  | .000002 | 2.869  | .000000 | 2.690  | .000000 | MAD2                   |
| Mtap9         | -.066  | .040000 | -.066  | .031400 | -.064  | .037400 | microtubule-associated |
| Mark1         | -1.240 | .022200 | -3.416 | .001180 | -3.407 | .001260 | MAP/microtubule        |

|               |        |         |        |         |        |         |                             |
|---------------|--------|---------|--------|---------|--------|---------|-----------------------------|
| Mcf2          | -1.333 | .011800 | -1.487 | .003890 | -1.448 | .004930 | multiple                    |
| Mcm           | 2.627  | .000008 | 4.035  | .000000 | 2.674  | .000011 | minichromosome              |
| Mcm4          | 2.270  | .000036 | 3.213  | .000000 | 3.497  | .000000 | minichromosome              |
| Mcm6          | 2.685  | .000005 | 3.762  | .000000 | 3.315  | .000001 | "minichromosome             |
| Mcm7          | 2.168  | .000805 | 3.104  | .000008 | 2.650  | .000085 | minichromosome              |
| Melk          | 3.496  | .000051 | 4.321  | .000003 | 3.714  | .000022 | maternal                    |
| 2610039C10Rik | 1.765  | .000301 | 3.065  | .000000 | 2.663  | .000002 | MIS18                       |
| Mki67         | 3.274  | .000015 | 3.662  | .000003 | 3.389  | .000009 | antigen                     |
| Mphosph9      | 1.476  | .023900 | 2.647  | .000109 | 2.206  | .000789 | M-phase                     |
| Mrpl13        | 1.263  | .001600 | 1.165  | .002550 | 1.801  | .000034 | mitochondrial               |
| Mrpl28        | .841   | .020200 | 1.575  | .004020 | 1.023  | .003730 | mitochondrial               |
| Naa38         | 1.317  | .010700 | 2.094  | .000107 | 1.943  | .000266 | "N(alpha)-acetyltransferase |
| Nampt         | 1.440  | .045800 | 2.335  | .001260 | 1.917  | .006780 | nicotinamide                |
| Ncapd3        | 1.857  | .005680 | 2.994  | .000020 | 2.775  | .000100 | "non-SMC                    |
| Ndc80         | 3.345  | .000005 | 4.100  | .000000 | 4.060  | .000000 | "NDC80                      |
| Nmral1        | 2.354  | .030900 | 3.061  | .003740 | 2.677  | .010400 | NmrA-like                   |
| Nol7          | .966   | .022400 | 1.242  | .002660 | 1.443  | .000711 | nucleolar                   |
| Nr3c2         | -.908  | .000000 | -.897  | .000000 | -.903  | .000000 | "nuclear                    |
| Nsun3         | -.520  | .000026 | -.544  | .000011 | -.491  | .000042 | NOL1/NOP2/Sun               |
| Nucks1        | .844   | .000187 | .894   | .000074 | .772   | .000392 | nuclear                     |
| Nup107        | 2.079  | .000019 | 2.270  | .000004 | 1.952  | .000033 | nucleoporin                 |
| Nup155        | 1.974  | .000238 | 2.172  | .000062 | 1.909  | .000278 | nucleoporin                 |
| Nup37         | 1.528  | .013000 | 1.873  | .001940 | 1.714  | .004230 | nucleoporin                 |
| Nup54         | 1.151  | .004970 | 1.572  | .000195 | 1.733  | .000078 | nucleoporin                 |
| Nusap1        | 3.128  | .000009 | 4.247  | .000000 | 4.112  | .000000 | nucleolar                   |
| Oip5          | 2.197  | .000259 | 3.022  | .000005 | 2.322  | .000122 | Opa                         |
| Pam           | -.841  | .017200 | -1.365 | .000184 | -1.098 | .001670 | peptidylglycine             |
| 4930547N16Rik | 2.915  | .000047 | 3.088  | .000017 | 3.077  | .000022 | PARP1                       |
| Pcna          | 1.708  | .000018 | 2.519  | .000000 | 2.189  | .000001 | proliferating               |
| Pcxl2         | -4.383 | .000000 | -4.383 | .000000 | -4.355 | .000000 | pecanex-like                |
| Pcsk5         | -2.732 | .000428 | -2.575 | .000593 | -2.386 | .001280 | proprotein                  |
| Pdia3         | -1.980 | .001070 | -2.043 | .000615 | -1.327 | .019700 | protein                     |
| Pdia6         | -.193  | .000481 | -.193  | .000370 | -.192  | .000410 | protein                     |
| Pdpn          | -1.905 | .016400 | -1.513 | .042400 | -1.759 | .020600 | podoplanin                  |
| Pdrg1         | -1.459 | .040400 | -1.709 | .013300 | -2.094 | .002920 | p53                         |
| H2-Ke2        | .931   | .030900 | 1.133  | .006310 | 1.031  | .012400 | H2-K                        |
| Plk1          | 3.362  | .000117 | 3.649  | .000034 | 2.604  | .001260 | polo-like                   |
| Pnpt1         | 1.239  | .001200 | .942   | .009230 | .906   | .012000 | polyribonucleotide          |
| Podn          | -.390  | .017100 | -.434  | .006050 | -.432  | .006370 | podocan                     |
| Pola1         | 3.538  | .000259 | 5.035  | .000003 | 4.389  | .000021 | "polymerase                 |
| Pold3         | 1.541  | .038700 | 1.838  | .001340 | 2.312  | .001680 | "polymerase                 |
| Ppih          | 2.315  | .030800 | 2.438  | .010000 | 2.528  | .007930 | peptidyl                    |
| Prkci         | .855   | .015200 | 1.797  | .000031 | .667   | .044400 | "protein                    |
| Prpf19        | .786   | .003230 | .540   | .031400 | .658   | .010000 | PRP19/PSO4                  |
| Psmc3ip       | 2.241  | .000084 | 2.694  | .000007 | 2.641  | .000034 | "proteasome                 |
| Ptcd2         | 1.207  | .009320 | .966   | .029900 | 1.321  | .003570 | pentatricopeptide           |
| Ptdss2        | -.107  | .000232 | -.124  | .000033 | -.124  | .000039 | phosphatidylserine          |
| Pter          | -1.698 | .002720 | -1.802 | .001200 | -1.583 | .003850 | phosphotriesterase          |
| Ptplad1       | -1.266 | .018600 | -1.036 | .032600 | -1.968 | .000350 | protein                     |
| Racgap1       | 3.637  | .000010 | 4.484  | .000001 | 3.633  | .000010 | Rac                         |

|               |        |         |        |         |        |         |                    |
|---------------|--------|---------|--------|---------|--------|---------|--------------------|
| Rad18         | 3.027  | .000030 | 2.347  | .000025 | 2.013  | .000161 | RAD18              |
| Rad21         | 1.217  | .000927 | 1.674  | .000159 | 1.863  | .000008 | RAD21              |
| Rad50         | 1.214  | .003360 | .926   | .019300 | 1.178  | .003400 | RAD50              |
| Ran           | .858   | .003900 | .942   | .000697 | .983   | .000908 | "RAN               |
| Rapgef3       | -1.161 | .001600 | -1.324 | .000349 | -1.359 | .000281 | Rap                |
| Rbm14         | 1.348  | .027300 | 1.982  | .001050 | 1.516  | .009750 | RNA                |
| Rell1         | .847   | .033600 | 2.043  | .000007 | 1.743  | .000051 | RELT-like          |
| Rfc4          | 2.334  | .000106 | 3.648  | .000000 | 3.172  | .000003 | replication        |
| Rfc5          | 3.052  | .000006 | 3.795  | .000000 | 2.689  | .000022 | replication        |
| Rhobtb1       | -2.343 | .007820 | -2.460 | .004040 | -1.638 | .049000 | Rho-related        |
| Samd4b        | -1.879 | .005940 | -1.511 | .021300 | -2.313 | .000761 | sterile            |
| Scamp1        | -1.338 | .025600 | -1.463 | .010900 | -1.387 | .015800 | secretory          |
| Selp          | -4.438 | .000000 | -4.441 | .000000 | -4.441 | .000000 | "selectin          |
| Set           | 1.172  | .007450 | 1.210  | .004390 | 1.362  | .001670 | SET                |
| Setdb1        | 1.027  | .029000 | 1.762  | .000252 | 1.481  | .001450 | "SET               |
| Setdb2        | 1.309  | .012100 | 2.695  | .000007 | 2.011  | .000210 | "SET               |
| Shcbp1        | 3.400  | .000031 | 4.015  | .000003 | 3.915  | .000005 | Shc                |
| Shfm1         | .719   | .011800 | .635   | .020900 | .865   | .002140 | split              |
| Sirt2         | -1.113 | .003010 | -.931  | .009360 | -1.559 | .000087 | "sirtuin           |
| Skp2          | 2.856  | .000254 | 3.473  | .000021 | 3.946  | .000108 | S-phase            |
| Slc16a9       | -4.760 | .000000 | -5.092 | .000000 | -5.092 | .000000 | "solute            |
| Slc44a1       | -1.779 | .007040 | -1.867 | .003630 | -1.350 | .031000 | "solute            |
| Slk           | 1.319  | .030900 | 1.407  | .010600 | 1.344  | .014600 | STE20-like         |
| Smc2          | 2.427  | .000100 | 3.089  | .000004 | 2.815  | .000017 | structural         |
| Smc4          | 1.533  | .020300 | 2.750  | .000080 | 2.299  | .001120 | structural         |
| Snrpd1        | 1.013  | .004280 | 1.635  | .000024 | 1.151  | .001090 | small              |
| Snrpe         | 1.079  | .002510 | 1.146  | .001100 | 1.373  | .000196 | small              |
| Sox17         | -.088  | .038700 | -.088  | .030000 | -.088  | .030300 | SRY-box            |
| Spag5         | 4.387  | .000000 | 4.797  | .000000 | 4.127  | .000000 | sperm              |
| Spc25         | 2.351  | .000028 | 2.650  | .000005 | 2.824  | .000003 | "SPC25             |
| Spock2        | -5.212 | .000000 | -5.128 | .000000 | -5.243 | .000000 | "sparc/osteonectin |
| Spry4         | -3.103 | .000162 | -2.949 | .000209 | -2.841 | .000334 | sprouty            |
| Spsb1         | -3.225 | .000000 | -3.112 | .000000 | -3.226 | .000000 | splA/ryanodine     |
| St6galnac3    | -.124  | .038700 | -.124  | .030100 | -.124  | .030300 | "ST6               |
| Stil          | 2.358  | .005680 | 3.282  | .000190 | 2.259  | .006120 | Scl/Tal1           |
| Stmn1         | 1.710  | .001500 | 2.427  | .000028 | 1.670  | .001520 | stathmin           |
| Stom          | -2.958 | .018900 | -2.117 | .019600 | -3.157 | .009290 | stomatin           |
| Suv39h2       | 3.237  | .010600 | 4.483  | .000472 | 3.211  | .008680 | suppressor         |
| Tardbp        | .932   | .025100 | 1.112  | .005670 | 1.130  | .005120 | TAR                |
| Tcf19         | 2.202  | .010000 | 3.608  | .000070 | 2.317  | .005250 | transcription      |
| Tcf3          | 1.653  | .000045 | 1.548  | .000067 | .720   | .036600 | transcription      |
| Tfdp1         | 1.203  | .004450 | 1.336  | .001350 | .828   | .037300 | transcription      |
| Timeless      | 3.784  | .000018 | 5.041  | .000000 | 3.939  | .000010 | timeless           |
| Tmpo          | 2.403  | .000024 | 3.064  | .000001 | 2.865  | .000003 | thymopoietin       |
| Top2a         | 5.786  | .000000 | 5.150  | .000000 | 5.211  | .000000 | topoisomerase      |
| Trim27        | .943   | .011400 | 1.012  | .005080 | .700   | .046800 | tripartite         |
| Trim37        | 1.192  | .017000 | 1.606  | .001170 | 1.398  | .004030 | tripartite         |
| Trip13        | 2.539  | .000135 | 3.225  | .000006 | 2.880  | .000029 | thyroid            |
| 1190005F20Rik | -.161  | .043400 | -.167  | .029900 | -.168  | .030200 | tRNA               |
| Troap         | 3.490  | .007120 | 4.489  | .000577 | 3.032  | .014800 | trophinin          |

|        |        |         |        |         |        |         |                       |
|--------|--------|---------|--------|---------|--------|---------|-----------------------|
| Ttk    | 4.461  | .000001 | 5.071  | .000000 | 5.282  | .000000 | Ttk                   |
| Tyms   | 2.620  | .001240 | 3.099  | .000174 | 2.681  | .000813 | thymidylate           |
| Ube2c  | 2.633  | .000786 | 3.708  | .000014 | 2.317  | .002080 | ubiquitin-conjugating |
| Ube2t  | 3.088  | .000006 | 4.031  | .000000 | 3.296  | .000002 | ubiquitin-conjugating |
| Ubxn4  | -.631  | .036500 | -.586  | .040500 | -1.031 | .000648 | UBX                   |
| Ung    | 3.439  | .039500 | 4.929  | .002700 | 3.572  | .026800 | uracil                |
| Usp14  | .921   | .010100 | 1.060  | .002480 | .959   | .005780 | ubiquitin             |
| Wdr74  | 1.563  | .001240 | 1.258  | .006210 | 1.092  | .016800 | WD                    |
| Xpo1   | 1.233  | .000598 | 1.560  | .000034 | 1.604  | .000030 | "exportin             |
| Ypel2  | -1.758 | .000005 | -1.758 | .000004 | -1.756 | .000005 | yippee-like           |
| Zfp36  | -3.604 | .003880 | -2.762 | .020600 | -2.863 | .016300 | zinc                  |
| Zwilch | 3.161  | .000011 | 3.267  | .000005 | 3.408  | .000004 | zwilch                |
